# Supplementary material
Source: PubMed Central journal article supplement (PMC3725593)
Supplement: NIHMS487574-supplement-Supplementary_Data.pdf [file NIHMS487574-supplement-Supplementary_Data.pdf]

NANO MICRO  
**small**

Supporting Information

for *Small*, DOI: 10.1002/smll.201202243

Comparison of Nanotube–Protein Corona Composition in Cell Culture Media

*Jonathan H. Shannahan, Jared M. Brown, Ran Chen, Pu Chun Ke, Xianyin Lai, Somenath Mitra, and Frank A. Witzmann\**

Supporting Information Figure 1.

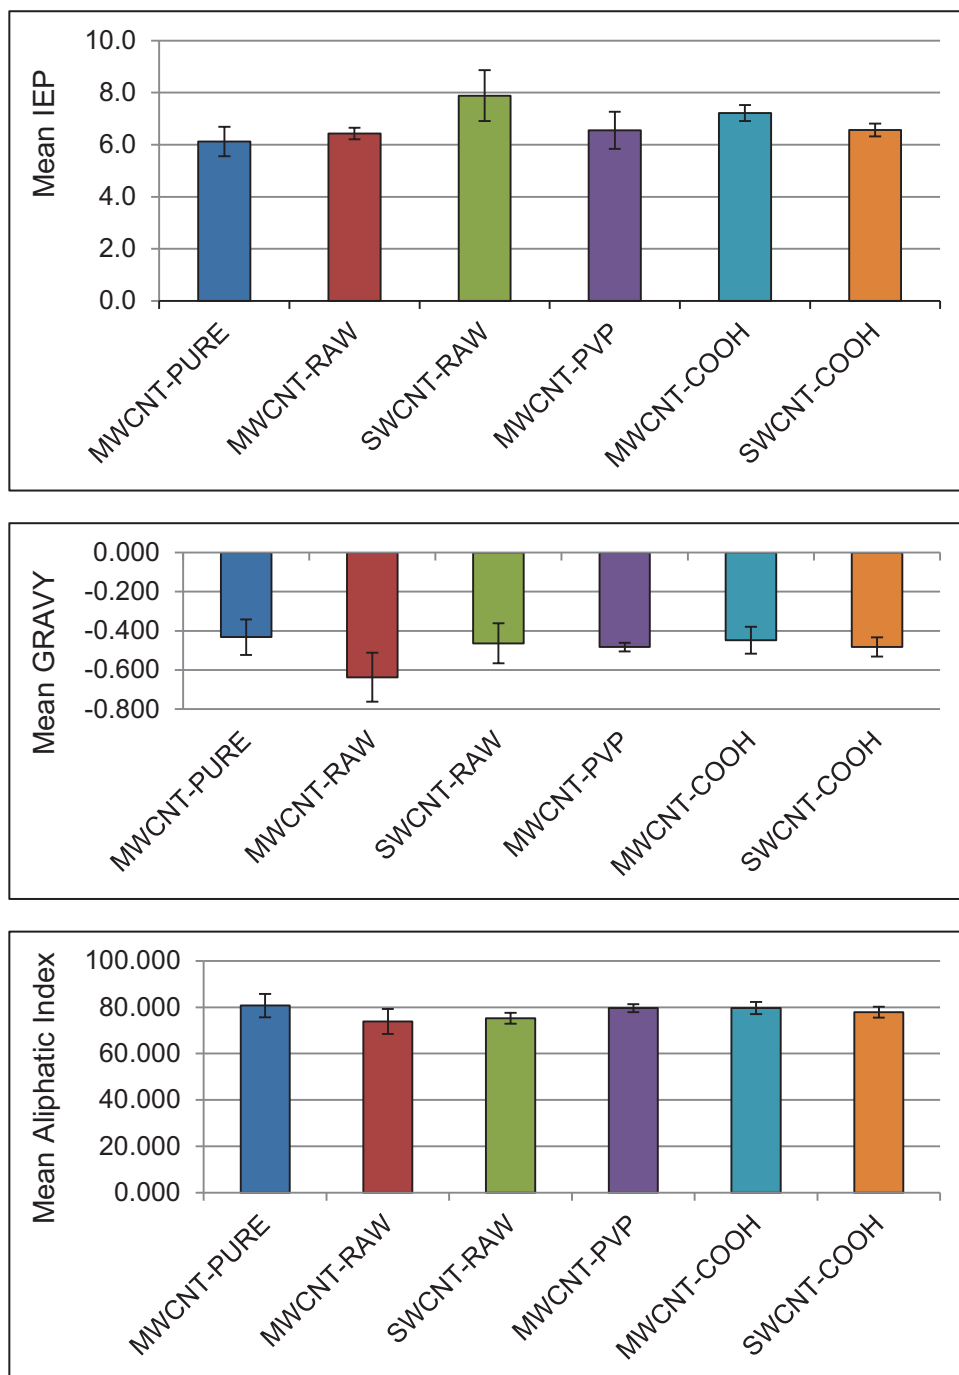

Supporting Information EDS Studies

# SWCNT-COOH

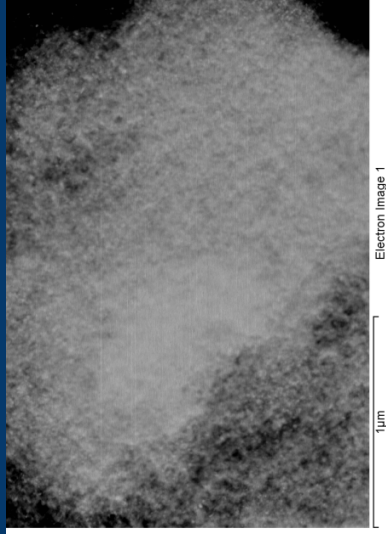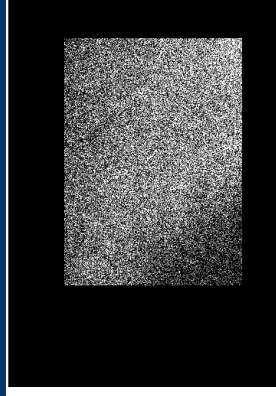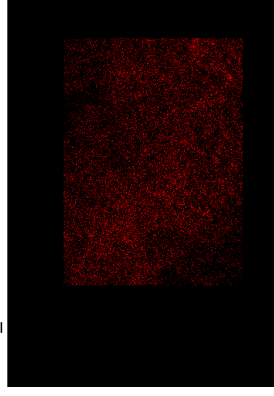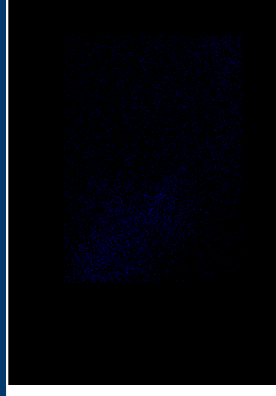

## Spectrum processing :

Peaks possibly omitted : 0.859, 1.054, 1.255, 1.490, 1.746, 2.312, 2.633, 3.330, 3.700, 4.015, 6.398, 7.474, 8.039, 8.902 keV

Quantitation method : Cliff Lorimer thin ratio section.

Processing option : All elements analyzed

Number of iterations = 1

Standardless

| Element | Weight% | Atomic% |
|---------|---------|---------|
| C K     | 96.92   | 97.67   |
| O K     | 3.08    | 2.33    |
| Totals  | 100.00  |         |

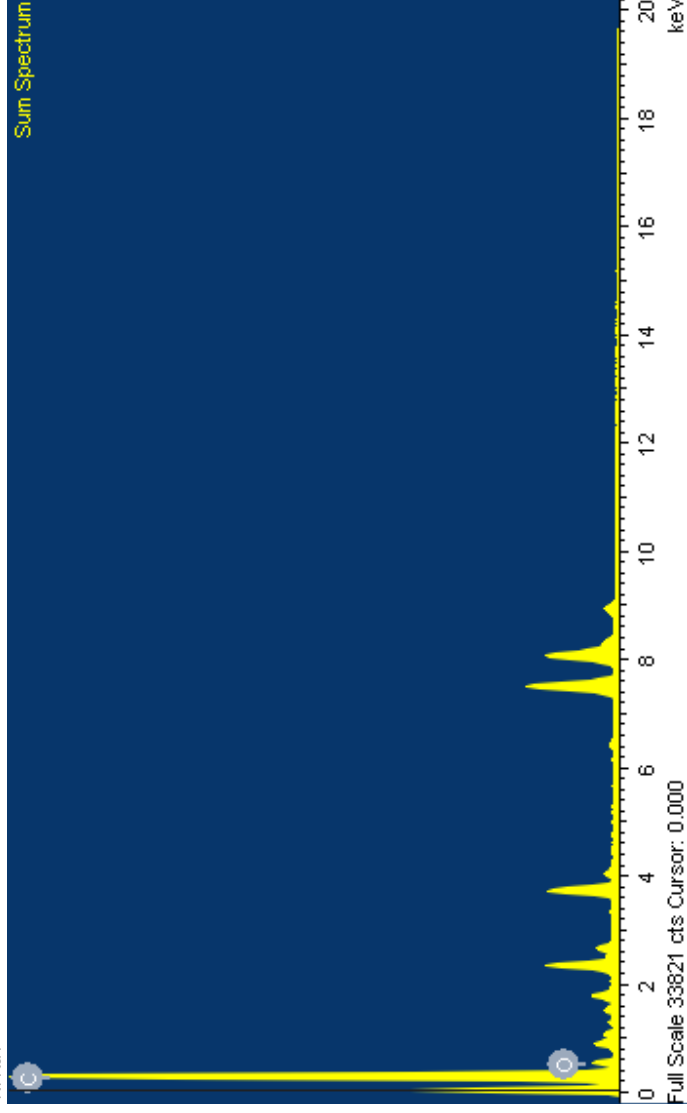

# MWCNT-COOH

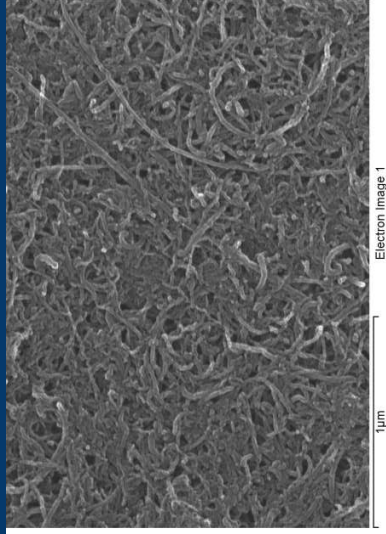

Spectrum processing :

Peaks possibly omitted : 0.929, 1.470, 1.739, 2.314, 6.947, 7.460, 8.040, 8.897 keV

Quantitation method : Cliff Lorimer thin ratio section.

Processing option : All elements analyzed

Number of iterations = 1

Standardless

| Element | Weight% | Atomic% |
|---------|---------|---------|
| C K     | 97.40   | 98.04   |
| O K     | 2.60    | 1.96    |
| Totals  | 100.00  |         |

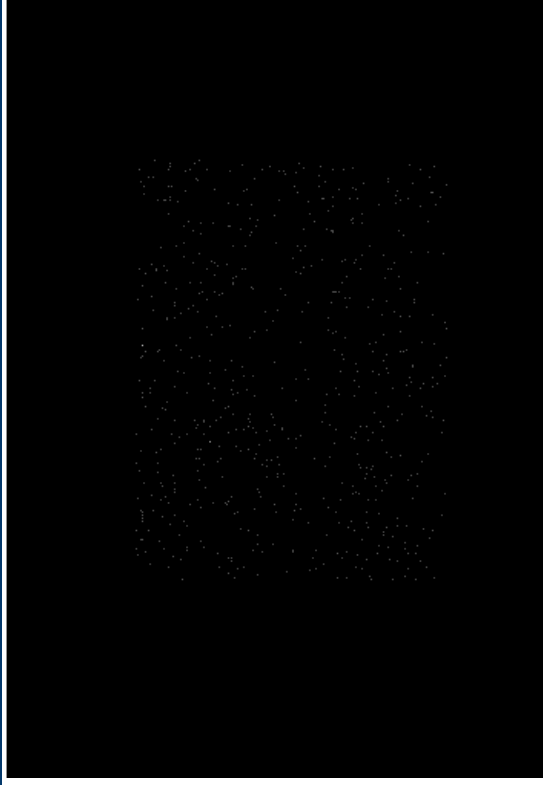

Co Ka1

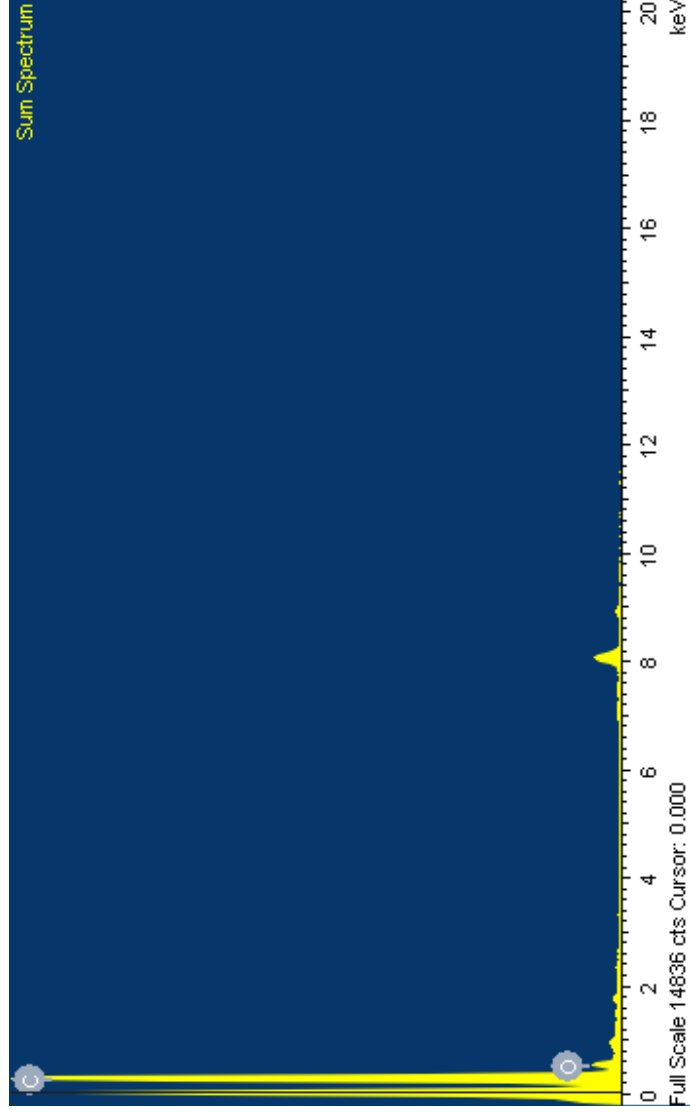

# MWCNT-PVP

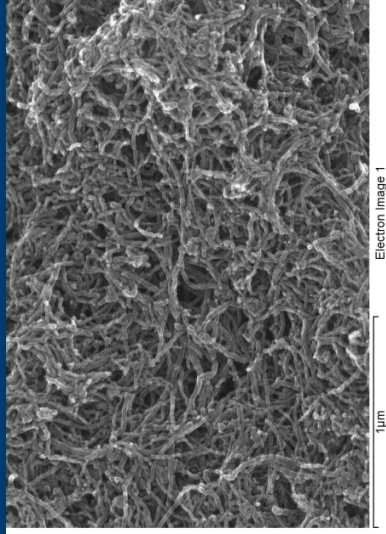

Electron Image 1

## Spectrum processing :

Peaks possibly omitted : 0.859, 1.491, 1.750, 2.315, 6.419, 7.474, 8.040, 8.899, 19.021 keV

Quantitation method : Cliff Lorimer thin ratio section.

Processing option : All elements analyzed

Number of iterations = 1

Standardless

| Element | Weight% | Atomic% |
|---------|---------|---------|
| C K     | 97.59   | 98.05   |
| N K     | 1.19    | 1.02    |
| O K     | 1.23    | 0.92    |
| Totals  | 100.00  |         |

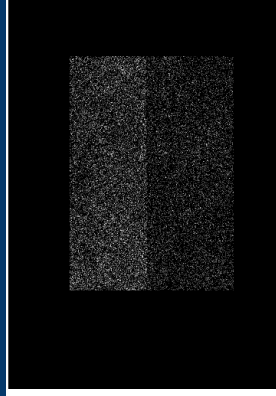

C Ka1\_2

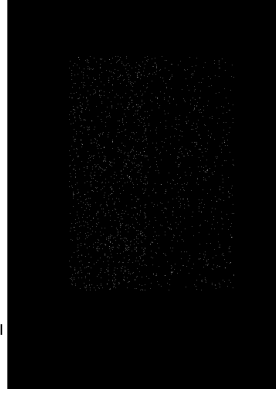

N Ka1\_2

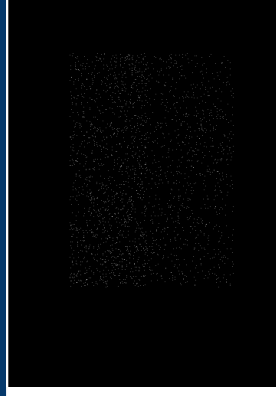

O Ka1

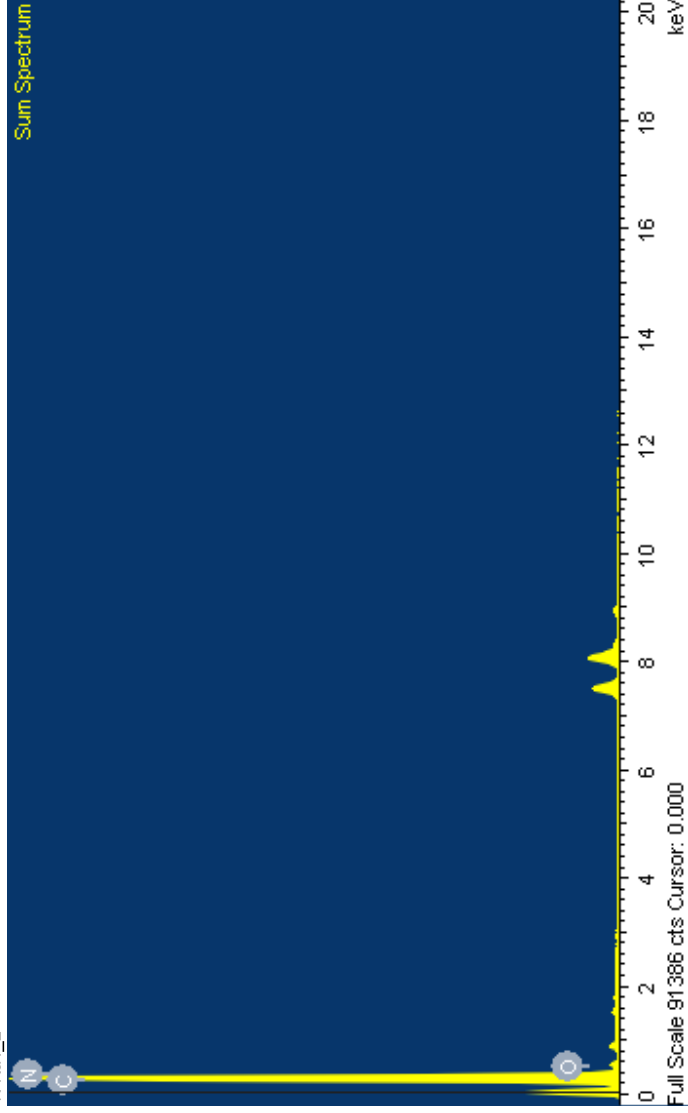

# MWCNT-Pure

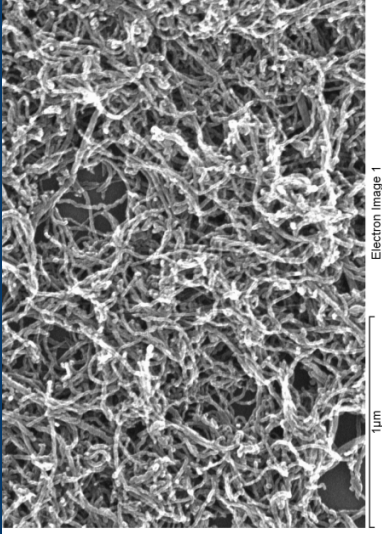

Spectrum processing :

Peaks possibly omitted : 0.859, 1.498, 1.740, 7.471, 8.043, 8.903 keV

Quantitation method : Cliff Lorimer thin ratio section.

Processing option : All elements analyzed

Number of iterations = 1

Standardless

| Element | Weight% | Atomic% |
|---------|---------|---------|
| C K     | 98.77   | 99.09   |
| N K     | -0.18   | -0.16   |
| O K     | 1.41    | 1.07    |
| Totals  | 100.00  |         |

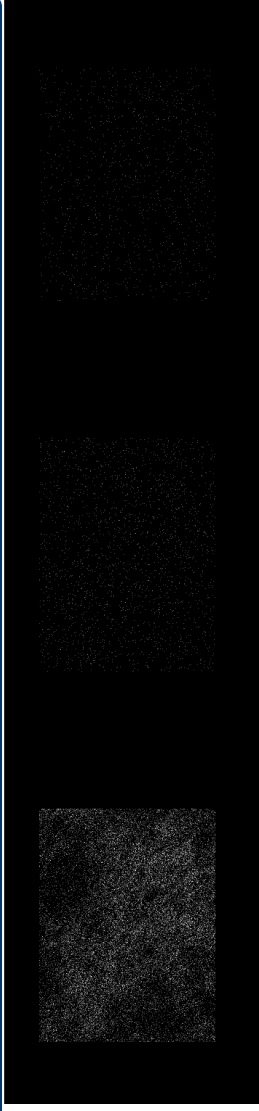

C Ka1\_2

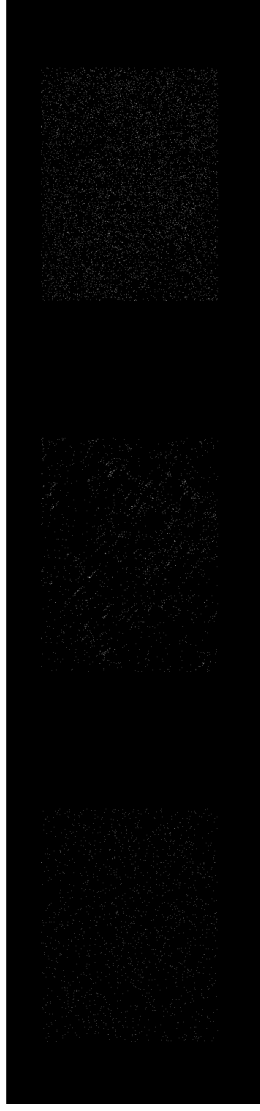

O Ka1

Al Ka1

Si Ka1

Ni Ka1

Cu Ka1

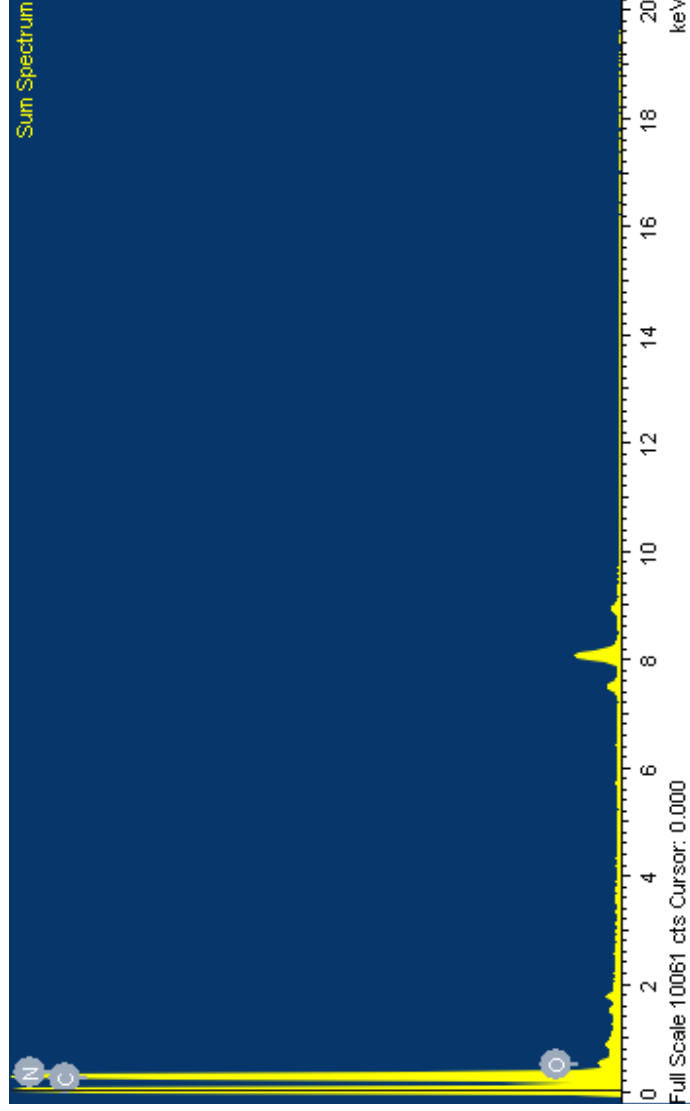

Full Scale 10061 cts Cursor: 0.000

## MWCNT-Raw

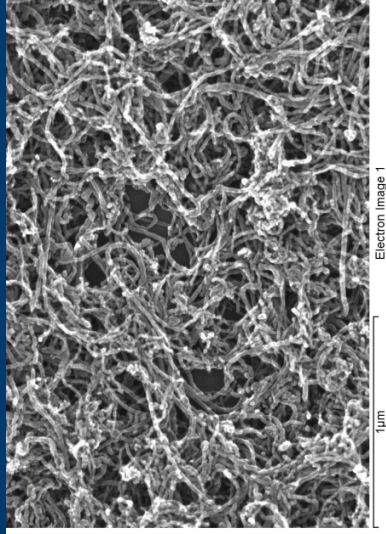

Spectrum processing :

Peaks possibly omitted : 0.854, 1.480, 1.740, 7.471, 8.044, 8.907 keV

Quantitation method : Cliff Lorimer thin ratio section.

Processing option : All elements analyzed

Number of iterations = 1

Standardless

| Element | Weight% | Atomic% |
|---------|---------|---------|
| C K     | 98.65   | 98.98   |
| N K     | 0.00    | 0.00    |
| O K     | 1.35    | 1.02    |
| Totals  | 100.00  |         |

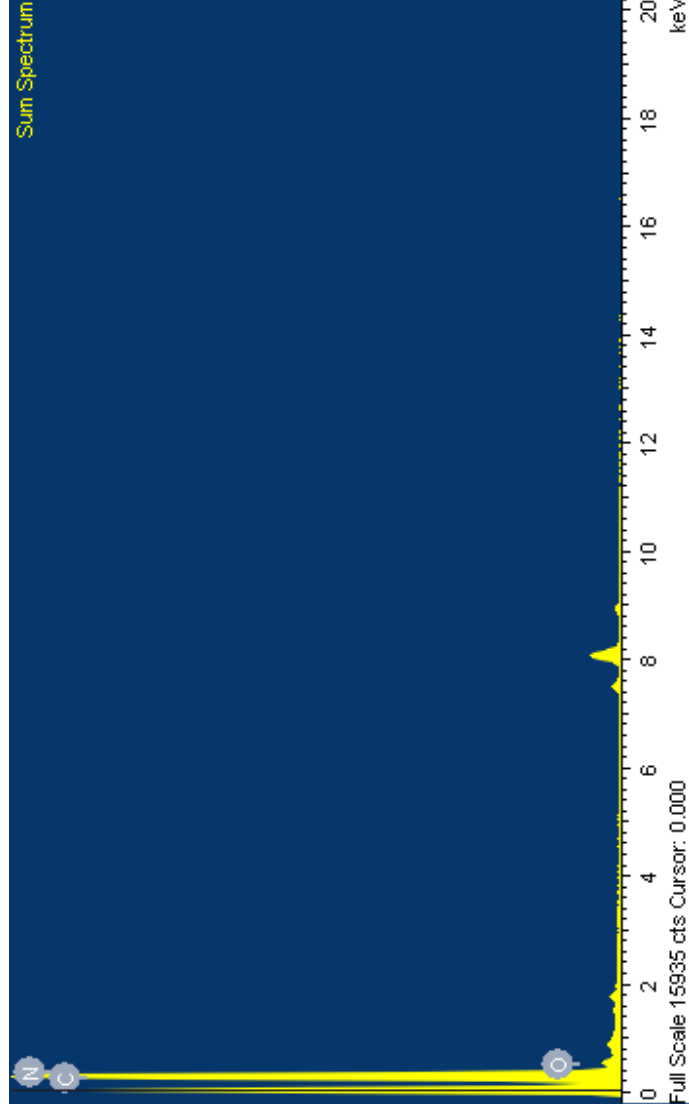



# Nanoclay

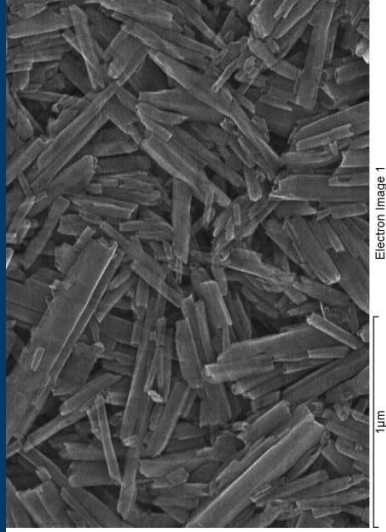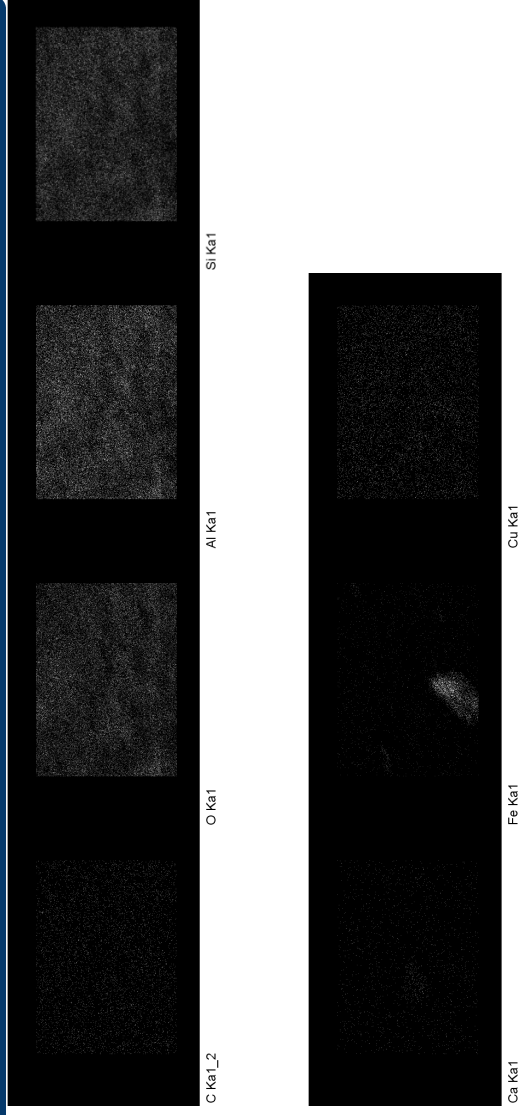

Spectrum processing :

Peak possibly omitted : 2.341 keV

Quantitation method : Cliff Lorimer thin ratio section.

Processing option : All elements analyzed

Number of iterations = 1

Standardless

| Element | Weight% | Atomic% |
|---------|---------|---------|
| C K     | 3.81    | 6.74    |
| N K     | 0.82    | 1.25    |
| O K     | 37.75   | 50.17   |
| Al K    | 25.80   | 20.33   |
| Si K    | 25.42   | 19.25   |
| Ca K    | 0.20    | 0.10    |
| Fe K    | 1.81    | 0.69    |
| Cu K    | 4.39    | 1.47    |

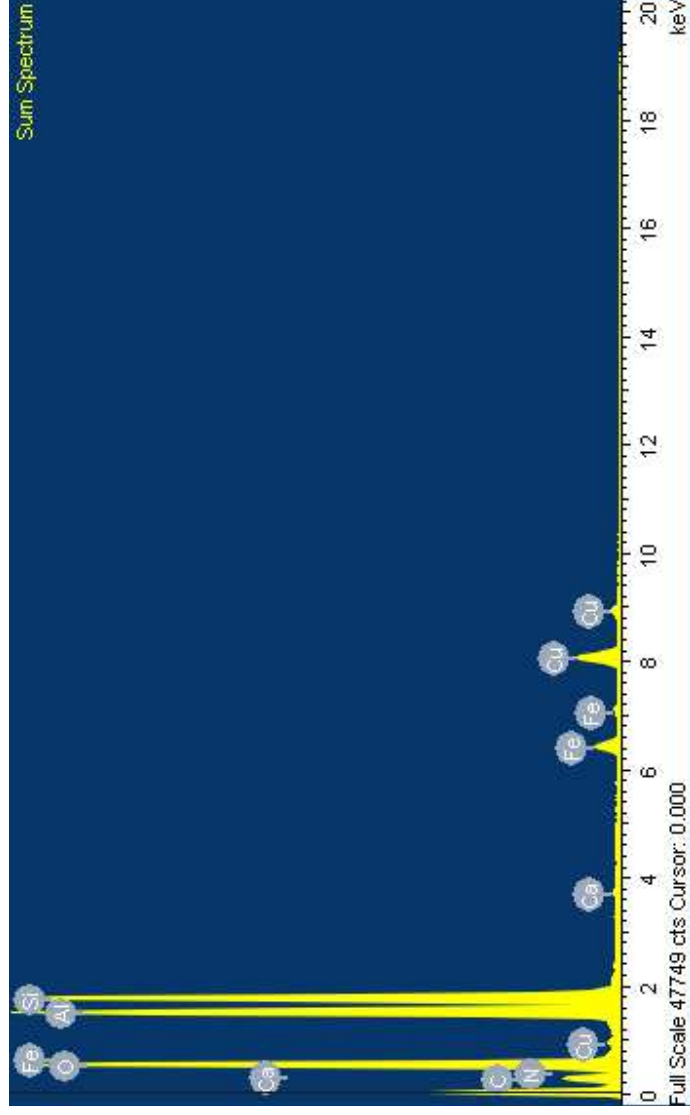

# SWCNT-Raw

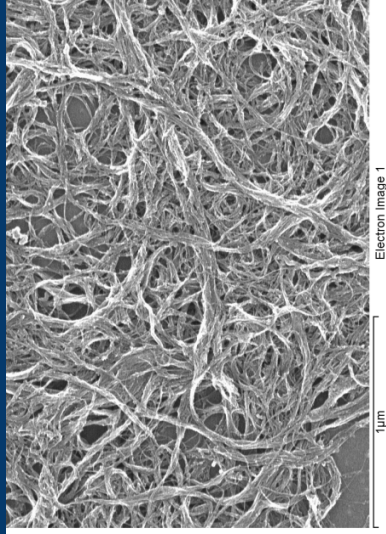

Spectrum processing :

Peaks possibly omitted : 1.501, 1.746, 2.629, 6.406, 7.058, 8.045, 8.906 keV

Quantitation method : Cliff Lorimer thin ratio section.

Processing option : All elements analyzed

Number of iterations = 1

Standardless

| Element | Weight% | Atomic% |
|---------|---------|---------|
| C K     | 94.91   | 96.06   |
| N K     | 0.68    | 0.59    |
| O K     | 4.41    | 3.35    |
| Totals  | 100.00  |         |

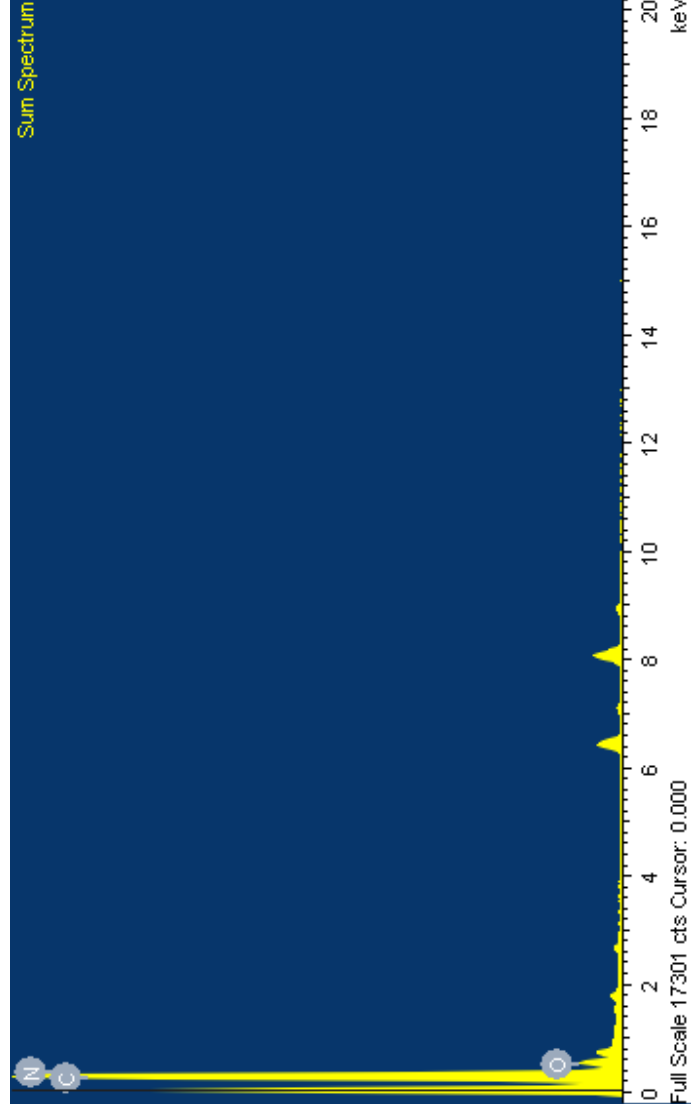

Supporting Information Table 1. Identification of all proteins.

| Protein ID | Protein Entry | Gene Name | Protein Name                                                | Protein Probability | Protein Coverage (%)               | # of Unique Sequences | # of Identified Peptides |
|------------|---------------|-----------|-------------------------------------------------------------|---------------------|------------------------------------|-----------------------|--------------------------|
|            |               |           |                                                             |                     | Peptide Sequence                   | Peptide Charge        | Peptide Probability      |
| A0JNC0     | TMOD1_BOVIN   | TMOD1     | Tropomodulin-1                                              | 0.999               | 13.37                              | 2                     | 2                        |
| G1K1R3     | G1K1R3_BOVIN  | TMOD1     | Uncharacterized protein                                     | 0.999               | 13.41                              | 2                     | 2                        |
|            |               |           |                                                             |                     | PTQYKVPDPEENATDVEETLERIK           | 3                     | 0.999                    |
|            |               |           |                                                             |                     | TLENEDELDPDNALLPAGLRQK             | 3                     | 0.999                    |
| A2VDK3     | A2VDK3_BOVIN  | DAAM1     | Dishevelled associated activator of morphogenesis 1         | 1.000               | 4.87                               | 3                     | 3                        |
|            |               |           |                                                             |                     | FVTRFDLDGLSCILNFKLTMDETSESR        | 3                     | 0.999                    |
|            |               |           |                                                             |                     | NEDELEFAKR                         | 3                     | 0.999                    |
|            |               |           |                                                             |                     | RITNQMTDSSRR                       | 3                     | 0.999                    |
| A3KN19     | FA83D_BOVIN   | FAM83D    | Protein FAM83D                                              | 0.999               | 9.47                               | 2                     | 2                        |
| F1MRT0     | F1MRT0_BOVIN  | FAM83D    | Uncharacterized protein                                     | 0.999               | 9.47                               | 2                     | 2                        |
|            |               |           |                                                             |                     | LAREVIAMVMDVFTDIDIFRDLQEISR        | 3                     | 0.999                    |
|            |               |           |                                                             |                     | YDGLDELPAACLSPCGPPNPAELYSEER       | 3                     | 0.999                    |
| A4FUE5     | A4FUE5_BOVIN  | RAB3GAP1  | RAB3GAP1 protein                                            | 0.999               | 4.48                               | 2                     | 2                        |
|            |               |           |                                                             |                     | KTSPSDNVTNTYSGDAGKSGDQLGPDNLR      | 3                     | 0.999                    |
|            |               |           |                                                             |                     | VLHYLAVQKPADLAR                    | 3                     | 0.999                    |
| A4IFK4     | A4IFK4_BOVIN  | SYNPO2    | Synaptotodin-2                                              | 1.000               | 4.92                               | 3                     | 3                        |
|            |               |           |                                                             |                     | EFYIVPIKSGAPLAEQASGAGFSGSIK        | 3                     | 0.874                    |
|            |               |           |                                                             |                     | LQGGKEQQQLQVAK                     | 3                     | 0.999                    |
|            |               |           |                                                             |                     | MDQITAQKEEERAVGVPSR                | 3                     | 0.999                    |
| A4IFN9     | A4IFN9_BOVIN  | SMG5      | SMG5 protein                                                | 0.999               | 2.76                               | 2                     | 2                        |
|            |               |           |                                                             |                     | PVSASGKEMDWQAMACHR                 | 3                     | 0.999                    |
|            |               |           |                                                             |                     | PVSASGKEMDWQAMACHRCLVYLGLDSR       | 3                     | 0.999                    |
| A5D711     | A5D711_BOVIN  | EPS15     | EPS15 protein                                               | 1.000               | 5.05                               | 2                     | 2                        |
| E1B8R2     | E1B8R2_BOVIN  | EPS15     | Uncharacterized protein                                     | 1.000               | 5.05                               | 2                     | 2                        |
|            |               |           |                                                             |                     | LPVDILGRVWELSDIDHDGMLDR            | 3                     | 0.999                    |
|            |               |           |                                                             |                     | YYRQVDTGNTGRVLASDAAVFLK            | 3                     | 0.999                    |
| A5D7M6     | A5D7M6_BOVIN  | KRT5      | KRT5 protein                                                | 1.000               | 7.04                               | 4                     | 4                        |
| Q5XQN5     | K2C5_BOVIN    | KRT5      | Keratin, type II cytoskeletal 5                             | 1.000               | 6.99                               | 4                     | 4                        |
| E1BIL2     | E1BIL2_BOVIN  | KRT5      | Uncharacterized protein                                     | 1.000               | 7.33                               | 4                     | 4                        |
|            |               |           |                                                             |                     | LRSEIDNVKK                         | 3                     | 0.999                    |
|            |               |           |                                                             |                     | NKYEDEINKR                         | 3                     | 1.000                    |
|            |               |           |                                                             |                     | SLDLSIIAEVK                        | 2                     | 0.999                    |
|            |               |           |                                                             |                     | YEELQQTAGR                         | 2                     | 0.983                    |
| A5PJE3     | A5PJE3_BOVIN  | FGA       | Fibrinogen alpha chain                                      | 1.000               | 17.72                              | 8                     | 9                        |
| P02672     | FIBA_BOVIN    | FGA       | Fibrinogen alpha chain                                      | 1.000               | 17.72                              | 8                     | 9                        |
|            |               |           |                                                             |                     | EEGSVSSGTQEFHTGK                   | 3                     | 1.000                    |
|            |               |           |                                                             |                     | GDSVSQGTGLAPGSPR                   | 2                     | 1.000                    |
|            |               |           |                                                             |                     | GNLDDFFHR                          | 2                     | 0.997                    |
|            |               |           |                                                             |                     | MSTITGPPREFKSQLQEAPELWK            | 3                     | 0.896                    |
|            |               |           |                                                             |                     | MVLETFGGDGHAR                      | 2                     | 0.999                    |
|            |               |           |                                                             |                     | MVLETFGGDGHAR                      | 3                     | 0.838                    |
|            |               |           |                                                             |                     | QFVSSSTVNR                         | 2                     | 0.969                    |
|            |               |           |                                                             |                     | SQLQEAPELWK                        | 2                     | 0.947                    |
|            |               |           |                                                             |                     | TGLAPEFAALGESGSSSSK                | 2                     | 1.000                    |
| A6H6W9     | SDS3_BOVIN    | SUDS3     | Sin3 histone deacetylase corepressor complex component SDS3 | 0.999               | 14.02                              | 2                     | 2                        |
|            |               |           |                                                             |                     | NAELFLQLETEQVERNYIKEK              | 3                     | 0.999                    |
|            |               |           |                                                             |                     | SPKRPAASPSSPEHLPTTAPAESPAQR        | 3                     | 0.999                    |
| A6H709     | A6H709_BOVIN  | HSPC321   | HSPC321 protein                                             | 1.000               | 7.35                               | 2                     | 2                        |
| P0C1G6     | SWP70_BOVIN   | SWAP70    | Switch-associated protein 70                                | 1.000               | 7.35                               | 2                     | 2                        |
|            |               |           |                                                             |                     | GIWHAFALDLHDSGKVSQSLK              | 3                     | 0.999                    |
|            |               |           |                                                             |                     | QMKELQIANENKQLEAVR                 | 3                     | 0.999                    |
| Q5EA25     | SRPX2_BOVIN   | SRPX2     | Sushi repeat-containing protein SRPX2                       | 0.999               | 7.96                               | 2                     | 2                        |
| A6H7A3     | A6H7A3_BOVIN  | SRPX2     | Sushi-repeat-containing protein, X-linked 2                 | 0.999               | 7.96                               | 2                     | 2                        |
|            |               |           |                                                             |                     | GGNYHSSLGTRCELSCDR                 | 3                     | 0.999                    |
|            |               |           |                                                             |                     | YYKMQISMLQOSTCGLDLR                | 3                     | 0.999                    |
| A6QLN9     | VWA1_BOVIN    |           | von Willebrand factor A domain-containing protein 1         | 0.999               | 15.01                              | 2                     | 2                        |
|            |               |           |                                                             |                     | ASLVHVGSRPHTEFPFGQHSSGSAVQDAIR     | 3                     | 0.999                    |
|            |               |           |                                                             |                     | QQLPGNATGWAWTGLDSDTDYDVALVPESNVR   | 3                     | 0.999                    |
| A6QLR2     | A6QLR2_BOVIN  | LARS      | LARS protein                                                | 0.999               | 2.89                               | 2                     | 2                        |
|            |               |           |                                                             |                     | EKLYLRGFDYDGMVLDVGFK               | 3                     | 0.999                    |
|            |               |           |                                                             |                     | VLEPYPSKLSGLKKGK                   | 3                     | 0.999                    |
| A6QNZ7     | A6QNZ7_BOVIN  | KRT10     | Keratin 10                                                  | 1.000               | 13.69                              | 8                     | 8                        |
| P06394     | K1C10_BOVIN   | KRT10     | Keratin, type I cytoskeletal 10                             | 1.000               | 13.69                              | 8                     | 8                        |
|            |               |           |                                                             |                     | DAEAWFNEK                          | 2                     | 0.997                    |
|            |               |           |                                                             |                     | IRLENEIQTYR                        | 3                     | 0.999                    |
|            |               |           |                                                             |                     | LAADDFR                            | 2                     | 0.990                    |
|            |               |           |                                                             |                     | QSLASLAETEGR                       | 2                     | 1.000                    |
|            |               |           |                                                             |                     | QSVVADINGLR                        | 2                     | 0.991                    |
|            |               |           |                                                             |                     | QSVVADINGLRR                       | 3                     | 0.933                    |
|            |               |           |                                                             |                     | SQVEQLAEKNR                        | 2                     | 1.000                    |
|            |               |           |                                                             |                     | VLELTLTK                           | 2                     | 1.000                    |
| A6QP52     | A6QP52_BOVIN  | SMTN      | SMTN protein                                                | 1.000               | 9.16                               | 2                     | 2                        |
|            |               |           |                                                             |                     | MPGVPGPSELAAALEERLGRALEELR         | 3                     | 0.999                    |
|            |               |           |                                                             |                     | TSTRHSQQTADGSAVSTVTK               | 3                     | 0.837                    |
| A6QP79     | COL12_BOVIN   | COLEC12   | Collectin-12                                                | 1.000               | 4.72                               | 2                     | 2                        |
|            |               |           |                                                             |                     | GLPGLPGMPGMPGIK                    | 3                     | 0.999                    |
|            |               |           |                                                             |                     | KALSTNSELSTFRSDILDLR               | 3                     | 0.999                    |
| A6QPM5     | A6QPM5_BOVIN  | ILDR2     | ILDR2 protein                                               | 1.000               | 9.22                               | 2                     | 2                        |
|            |               |           |                                                             |                     | AAKAGYPPSVSGVPGYIPSVPLGGAPSSGMLMDK | 3                     | 0.999                    |
|            |               |           |                                                             |                     | SYCQDRMGESLGMSSPRTQSLSK            | 3                     | 0.999                    |
| F1MIZ8     | F1MIZ8_BOVIN  | Bt.24236  | Uncharacterized protein                                     | 0.999               | 7.73                               | 3                     | 3                        |
| A7E300     | RHG07_BOVIN   | DLC1      | Rho GTPase-activating protein 7                             | 0.999               | 7.73                               | 3                     | 3                        |
|            |               |           |                                                             |                     | ALSNSGFSFSGNNSVNWRTGSGFHGPGHISLRR  | 3                     | 0.999                    |
|            |               |           |                                                             |                     | PSLNSVSLQINCQSVAAQMNLLQK           | 3                     | 0.999                    |
|            |               |           |                                                             |                     | RSISSSTQTSSSSSQSETSSNVSTPSPVTR     | 3                     | 0.999                    |
| A7MBA4     | A7MBA4_BOVIN  | PAG17     | PAG17 protein                                               | 0.999               | 13.95                              | 2                     | 2                        |
|            |               |           |                                                             |                     | IIACSGGCEALVDTGTALIKGPR            | 3                     | 0.999                    |
|            |               |           |                                                             |                     | NLNNFLKEHTYLSQISSRGSNLTIHPLR       | 3                     | 0.999                    |
| A7Z025     | A7Z025_BOVIN  | PRPF8     | PRPF8 protein                                               | 0.999               | 2.01                               | 2                     | 2                        |
|            |               |           |                                                             |                     | ATKFFQSTKLDVWVVGLOVQR              | 3                     | 0.999                    |
|            |               |           |                                                             |                     | VESHFDLELRAAVMHDLDMMEPEGIK         | 3                     | 0.999                    |
| A8E4N1     | A8E4N1_BOVIN  | AIM1L     | AIM1L protein                                               | 0.999               | 3.03                               | 2                     | 2                        |
|            |               |           |                                                             |                     | DYITPEISLYSEELK                    | 3                     | 0.999                    |
|            |               |           |                                                             |                     | SAPGPAGFLEEAAHPTPSQEVPAAHFDQEQDR   | 3                     | 0.999                    |
| E1AXU0     | E1AXU0_BOVIN  | CMYA1     | Cardiomyopathy associated protein 1                         | 1.000               | 2.47                               | 2                     | 2                        |
|            |               |           |                                                             |                     | EQQEREEEEEGKPGGQPOPEIPIHK          | 3                     | 0.999                    |
|            |               |           |                                                             |                     | WLSKPAALAHSAEEEGGQKHK              | 3                     | 0.999                    |
| E1B6X6     | E1B6X6_BOVIN  | Bt.32325  | Tyrosine-protein kinase BAZ1B                               | 0.954               | 2.43                               | 2                     | 2                        |
|            |               |           |                                                             |                     | EVVKFEPQVDTEADMISAVKSR             | 3                     | 0.804                    |
|            |               |           |                                                             |                     | YAVGEECDFEVVGK                     | 3                     | 0.851                    |
| G3MX12     | G3MX12_BOVIN  | HERC2     | E3 ubiquitin-protein ligase HERC2                           | 1.000               | 1.14                               | 2                     | 2                        |
| E1B782     | E1B782_BOVIN  | HERC2     | Uncharacterized protein                                     | 1.000               | 1.11                               | 2                     | 2                        |

|        |              |           |                                                                              |       |                                   |   |       |
|--------|--------------|-----------|------------------------------------------------------------------------------|-------|-----------------------------------|---|-------|
|        |              |           |                                                                              |       | LCSHRQALGDHAQAFLOAIADNNIQDHNVK    | 3 | 0.999 |
|        |              |           |                                                                              |       | LGVGGTESVSTPTLLESIQHVFVK          | 3 | 0.999 |
| E1B783 | E1B783_BOVIN | TTC13     | Tetratricopeptide repeat protein 13                                          | 0.999 | 5.01                              | 2 | 2     |
|        |              |           |                                                                              |       | QKVDIFDAYKSLGQAYR                 | 3 | 0.999 |
|        |              |           |                                                                              |       | SWMNLKISISPKYTLPSVSETFTPLR        | 3 | 0.999 |
| E1B7S3 | E1B7S3_BOVIN | EPB41L3   | Band 4.1-like protein 3                                                      | 0.999 | 5.39                              | 2 | 2     |
|        |              |           |                                                                              |       | DSVSAAEVGTGQYITTKGMSQTNLITTVTPEKK | 3 | 0.999 |
|        |              |           |                                                                              |       | SPGLGTDSCPLPPSAHRPPASPTGLR        | 3 | 0.999 |
| E1B7T1 | E1B7T1_BOVIN | Bt.77420  | Filamin-A-interacting protein 1                                              | 1.000 | 2.14                              | 2 | 2     |
|        |              |           |                                                                              |       | KEEDVMASGTVK                      | 3 | 0.839 |
|        |              |           |                                                                              |       | SECTQLHLNLEKEK                    | 3 | 0.999 |
| E1B7V9 | E1B7V9_BOVIN | MAG1      | Membrane-associated guanylate kinase, WW and PDZ domain-containing protein 1 | 0.999 | 4.07                              | 3 | 3     |
|        |              |           |                                                                              |       | GFGFTVVGGDPEDFELQIK               | 3 | 0.999 |
|        |              |           |                                                                              |       | LKVGDRILAVNGCSITNK                | 3 | 0.999 |
|        |              |           |                                                                              |       | PDPFKIWAQSRSMYENR                 | 3 | 0.999 |
| E1B805 | E1B805_BOVIN | C3        | Complement C3                                                                | 0.999 | 3.41                              | 3 | 3     |
|        |              |           |                                                                              |       | GTGQDPELVADSLIDVNDKCEKLEK         | 3 | 0.999 |
|        |              |           |                                                                              |       | NHGSVFASTIIDVTSKMLPSFR            | 3 | 0.999 |
|        |              |           |                                                                              |       | NHGSVFASTIIDVTSKMLPSFRILAFYLLPK   | 3 | 0.999 |
| E1B835 | E1B835_BOVIN | Bt.106471 | Uncharacterized protein                                                      | 0.999 | 9.31                              | 2 | 2     |
| E1B834 | E1B834_BOVIN | CRNN      | Cornulin                                                                     | 0.999 | 7.8                               | 2 | 2     |
|        |              |           |                                                                              |       | ETVIRRODQGSLSHASVPSAQGR           | 3 | 0.999 |
|        |              |           |                                                                              |       | GQITRHTGAGEGQGPQRQSGSSQR          | 3 | 0.999 |
| E1B842 | E1B842_BOVIN | HIVEP2    | Transcription factor HIVEP2                                                  | 0.999 | 2.25                              | 2 | 2     |
|        |              |           |                                                                              |       | ALYHNPPLSMGOYLQAEPIVLPNNLRR       | 3 | 0.999 |
|        |              |           |                                                                              |       | TLVTNAAMQGIGFNIAQVLGQHAGLEK       | 3 | 0.999 |
| E1B884 | E1B884_BOVIN | Bt.7490   | Uncharacterized protein                                                      | 0.999 | 3.98                              | 2 | 2     |
| Q0VCR7 | C1TM_BOVIN   | MTHFD1L   | Monofunctional C1-tetrahydrofolate synthase, mitochondrial                   | 0.999 | 3.9                               | 2 | 2     |
|        |              |           |                                                                              |       | GPGSPAPPARDSIVREVIQNSK            | 3 | 0.999 |
|        |              |           |                                                                              |       | YVLVAGITPTPLGEGK                  | 3 | 0.999 |
| E1B8H0 | E1B8H0_BOVIN | Bt.65579  | Pseudopodium-enriched atypical kinase 1                                      | 0.999 | 4.01                              | 3 | 3     |
|        |              |           |                                                                              |       | LENLLLVHYQPGGPTQGLGPAEPPSPPTPCPTR | 3 | 0.999 |
|        |              |           |                                                                              |       | PAIVFMYRCDPAQGLSMDQGGK            | 3 | 0.999 |
|        |              |           |                                                                              |       | QSEPNYEGLSGNDQEK                  | 3 | 0.829 |
| E1B8L6 | E1B8L6_BOVIN | Bt.4662   | Nitric oxide synthase                                                        | 0.999 | 3.16                              | 2 | 2     |
| F1MY54 | F1MY54_BOVIN | Bt.4662   | Nitric oxide synthase                                                        | 0.999 | 3.15                              | 2 | 2     |
| P29473 | NOS3_BOVIN   | NOS3      | Nitric oxide synthase, endothelial                                           | 0.999 | 3.15                              | 2 | 2     |
|        |              |           |                                                                              |       | DEVODAQRGVFGRVLTAFSR              | 3 | 0.999 |
|        |              |           |                                                                              |       | LQEVAEVASTGYHLR                   | 3 | 0.999 |
| E1B8T3 | E1B8T3_BOVIN | Bt.44586  | Transcription factor 20                                                      | 0.999 | 1.37                              | 2 | 2     |
|        |              |           |                                                                              |       | DLPSPDSRNCPAVTLTSPAKTK            | 3 | 0.999 |
|        |              |           |                                                                              |       | NCPAVTLTSPAKTKILPPR               | 3 | 0.999 |
| E1B8Z3 | E1B8Z3_BOVIN | DAAM2     | Disheveled-associated activator of morphogenesis 2                           | 0.986 | 4.1                               | 2 | 2     |
|        |              |           |                                                                              |       | ELGSTEDIHLASRKVK                  | 3 | 0.863 |
|        |              |           |                                                                              |       | FVPMVDFITVSSFSFSELEDQLNEARAK      | 3 | 0.900 |
| E1B925 | E1B925_BOVIN | Bt.21378  | AT-rich interactive domain-containing protein 1A                             | 0.999 | 2.84                              | 2 | 2     |
|        |              |           |                                                                              |       | IQPPSPAGSGSMQGPQTPQSTSSMAEGGDLK   | 3 | 0.999 |
|        |              |           |                                                                              |       | LLDISVPLMNSLVSOVICDVLFLIGQS       | 3 | 0.999 |
| E1B935 | E1B935_BOVIN | Bt.11942  | Uncharacterized protein                                                      | 0.999 | 3.74                              | 2 | 2     |
| F1N6W9 | F1N6W9_BOVIN | COL18A1   | Collagen alpha-1(XVIII) chain                                                | 0.999 | 2.92                              | 2 | 2     |
|        |              |           |                                                                              |       | EENIAGVGAKILNVAQIR                | 3 | 0.999 |
|        |              |           |                                                                              |       | PASARAGVLFVTDPAQAVVSVGVK          | 3 | 0.999 |
| E1B971 | E1B971_BOVIN | RPTN      | Repetin                                                                      | 1.000 | 6.29                              | 3 | 3     |
|        |              |           |                                                                              |       | ENGDSTSLCKEELKQLLAEFGDILR         | 3 | 0.999 |
|        |              |           |                                                                              |       | QGQSSHYGQTDRLGQLSSQYGGQDR         | 3 | 0.895 |
|        |              |           |                                                                              |       | RHEGERQDSCHSQSEK                  | 3 | 0.999 |
| E1B990 | E1B990_BOVIN | Bt.29236  | Uncharacterized protein                                                      | 1.000 | 8                                 | 3 | 3     |
| Q29S21 | K2C7_BOVIN   | KRT7      | Keratin, type II cytoskeletal 7                                              | 1.000 | 6.87                              | 3 | 3     |
|        |              |           |                                                                              |       | AQYEEIANR                         | 2 | 0.989 |
|        |              |           |                                                                              |       | LALDIEIATYR                       | 2 | 0.995 |
|        |              |           |                                                                              |       | SLDLSIIAEVK                       | 2 | 0.999 |
| E1B9D3 | E1B9D3_BOVIN | GPR179    | Probable G-protein coupled receptor 179                                      | 0.999 | 2.34                              | 2 | 2     |
|        |              |           |                                                                              |       | AEVTAEDGEGKVSSELPVHLQESTAPR       | 3 | 0.999 |
|        |              |           |                                                                              |       | VLTNDLGLSLGSPKWPOGDGYVGDVQHVHR    | 3 | 0.999 |
| E1B9H2 | E1B9H2_BOVIN | Bt.103171 | KIAA0232                                                                     | 0.999 | 3.84                              | 2 | 2     |
|        |              |           |                                                                              |       | AFETTAQACSESPRGDGYSSGVKIDWTK      | 3 | 0.999 |
|        |              |           |                                                                              |       | SWSSGSSEAGSSSSGNQGEKASAK          | 3 | 0.999 |
| E1B9K2 | E1B9K2_BOVIN | Bt.23129  | Uncharacterized protein                                                      | 0.999 | 9.22                              | 2 | 2     |
| Q0VCP3 | OLFL3_BOVIN  | OLFML3    | Olfactomedin-like protein 3                                                  | 0.999 | 9.36                              | 2 | 2     |
|        |              |           |                                                                              |       | EVDYLETQNPALPCVEVDEK              | 3 | 0.999 |
|        |              |           |                                                                              |       | YDMITDCGYTISQVRSMK                | 3 | 0.999 |
| E1B9K4 | E1B9K4_BOVIN | HMCN2     | Hemicentin-2                                                                 | 0.990 | 1.42                              | 3 | 3     |
|        |              |           |                                                                              |       | EGLSVPAGAGTQVLPGGQLR              | 3 | 0.876 |
|        |              |           |                                                                              |       | PPLVEGWGSGSLRGEPAATHLLFLLSPQIEK   | 3 | 0.841 |
|        |              |           |                                                                              |       | SALLACRATGHPLPTTWHR               | 3 | 0.846 |
| G3N309 | G3N309_BOVIN | DNAH8     | Dynein heavy chain 8, axonemal                                               | 1.000 | 1                                 | 2 | 2     |
| E1B9R5 | E1B9R5_BOVIN | Bt.100108 | Uncharacterized protein                                                      | 1.000 | 0.97                              | 2 | 2     |
|        |              |           |                                                                              |       | KGENIFVLVDGVPDAIWIENLSVLDNDK      | 3 | 0.999 |
|        |              |           |                                                                              |       | SRKNLHVLLCFSPVGEK                 | 3 | 0.999 |
| E1BA03 | E1BA03_BOVIN | PAK6      | Serine/threonine-protein kinase PAK 6                                        | 1.000 | 5.73                              | 2 | 2     |
|        |              |           |                                                                              |       | HGPEEARPQSCVLGSAAGR               | 3 | 0.999 |
|        |              |           |                                                                              |       | QVPWPELQSPRVLNGLAAK               | 3 | 0.999 |
| E1BA17 | E1BA17_BOVIN | Bt.56329  | Collagen alpha-1(XIV) chain                                                  | 0.999 | 2.5                               | 2 | 2     |
|        |              |           |                                                                              |       | ELGLTGKVGKGNPQIGTQGPR             | 3 | 0.999 |
|        |              |           |                                                                              |       | KIEDELITFVCETASATCPLVHK           | 3 | 0.999 |
| E1BA65 | E1BA65_BOVIN | Bt.38732  | Mismatch repair endonuclease PMS2                                            | 1.000 | 6.81                              | 2 | 2     |
|        |              |           |                                                                              |       | LKDYGVLEIEVSDNGCGVEEENFEGLTLK     | 3 | 0.999 |
|        |              |           |                                                                              |       | LVFDHNGKILQKTPYPR                 | 3 | 0.999 |
| E1BA80 | E1BA80_BOVIN | Bt.89517  | Unconventional myosin-XVIIIb                                                 | 0.989 | 1.94                              | 3 | 3     |
|        |              |           |                                                                              |       | DPLWSPTLR                         | 3 | 0.893 |
|        |              |           |                                                                              |       | LCVDADGSGVTEVEEHHVHR              | 2 | 0.940 |
|        |              |           |                                                                              |       | TPSPATDPGGGKGDIPGTPR              | 3 | 0.816 |
| E1BAA5 | E1BAA5_BOVIN | Bt.53895  | Probable tRNA (uracil-O(2)-)-methyltransferase                               | 0.999 | 4.19                              | 2 | 2     |
|        |              |           |                                                                              |       | GGSLSLAEVAGELDRETLQR              | 3 | 0.999 |
|        |              |           |                                                                              |       | SPAGGSAQAWNRRGSLSLAEVAGELDRETLQR  | 3 | 0.999 |
| E1BAF6 | E1BAF6_BOVIN | Bt.7325   | Protein PRRC2A                                                               | 0.999 | 0.97                              | 2 | 2     |
|        |              |           |                                                                              |       | QAADEDEKGMIR                      | 3 | 0.869 |
|        |              |           |                                                                              |       | WGPRPGSSRR                        | 3 | 0.999 |
| E1BAR2 | E1BAR2_BOVIN | Bt.42314  | Terminal uridylyltransferase 7                                               | 0.999 | 3.07                              | 2 | 2     |
|        |              |           |                                                                              |       | GQVPLIFDSKQQPSVPIGQLWELLR         | 3 | 0.999 |
|        |              |           |                                                                              |       | MEYFFDPDVLTEGELAPNDR              | 3 | 0.999 |
| E1BAT5 | E1BAT5_BOVIN | ANKRD11   | Ankyrin repeat domain-containing protein 11                                  | 1.000 | 1.5                               | 2 | 2     |
|        |              |           |                                                                              |       | HNTGHADPHAKHWRTDNWK               | 3 | 0.999 |
|        |              |           |                                                                              |       | QQSVPAAPSYGSPGQHPEDK              | 3 | 0.999 |
| E1BAU4 | E1BAU4_BOVIN | PCDH17    | Protocadherin-17                                                             | 0.999 | 3.7                               | 2 | 2     |
|        |              |           |                                                                              |       | EQQNHTLVLTALDGGGPPR               | 3 | 0.999 |
|        |              |           |                                                                              |       | VLGGGPGGGGLGGPGGSPVFK             | 3 | 0.999 |

|        |              |           |                                                     |       |                                    |   |       |
|--------|--------------|-----------|-----------------------------------------------------|-------|------------------------------------|---|-------|
| G5E518 | G5E518_BOVIN | Bt.67418  | Uncharacterized protein                             | 0.999 | 2.82                               | 2 | 2     |
| E1BB50 | CDK12_BOVIN  | CDK12     | Cyclin-dependent kinase 12                          | 0.999 | 3.32                               | 2 | 2     |
|        |              |           |                                                     |       | FDIIIGILEGTYGQVYK                  | 3 | 0.999 |
|        |              |           |                                                     |       | KDGGSGAGSLQPSSGGSSNSRER            | 3 | 0.999 |
| E1BBR6 | E1BBR6_BOVIN | FYCO1     | Uncharacterized protein                             | 0.999 | 3.58                               | 2 | 2     |
| G3MZW6 | G3MZW6_BOVIN | FYCO1     | Uncharacterized protein                             | 0.999 | 3.53                               | 2 | 2     |
| G3NZ5  | G3NZ5_BOVIN  | FYCO1     | FYVE and coiled-coil domain-containing protein 1    | 0.999 | 3.6                                | 2 | 2     |
|        |              |           |                                                     |       | ERVEGALAHTIQELREAQEAASR            | 3 | 0.999 |
|        |              |           |                                                     |       | SPFLKPKLSSDIVGQLYELTDVQFDLASR      | 3 | 0.999 |
| E1BBZ7 | E1BBZ7_BOVIN | EGR3      | Early growth response protein 3                     | 0.999 | 10.85                              | 2 | 2     |
|        |              |           |                                                     |       | PNPELSYSGSFQAPQNKVTVYLGK           | 3 | 0.999 |
|        |              |           |                                                     |       | QHHPFGSLPQPPLTLK                   | 3 | 0.999 |
| E1BC24 | E1BC24_BOVIN | Bt.46644  | Midasin                                             | 0.999 | 0.96                               | 3 | 3     |
|        |              |           |                                                     |       | FMKKFEAVLSEPCR                     | 3 | 0.831 |
|        |              |           |                                                     |       | KMVAFNQIDHEVTVEKK                  | 3 | 0.999 |
|        |              |           |                                                     |       | YPSLSAATDHLLDIYFQLIGEK             | 3 | 0.999 |
| E1BC55 | E1BC55_BOVIN | LOC533883 | Uncharacterized protein                             | 0.999 | 2.67                               | 2 | 2     |
|        |              |           |                                                     |       | NVSLFPKAAISQPMNPVIFESNK            | 3 | 0.999 |
|        |              |           |                                                     |       | TTLEAQHPGTEGAGIQGERAPPR            | 3 | 0.999 |
| E1BC86 | E1BC86_BOVIN | Bt.37491  | Polycystin-1                                        | 1.000 | 1.74                               | 3 | 3     |
|        |              |           |                                                     |       | SEGLVPLEETSPREAVCLTR               | 3 | 1.000 |
|        |              |           |                                                     |       | SSYVYLEGRCDNCDGGLHGLWAAR           | 3 | 0.999 |
|        |              |           |                                                     |       | YSPAVGLHAAVTLRLEFFAAGHVAVALSVR     | 3 | 1.000 |
| E1BCE1 | E1BCE1_BOVIN | ATAD5     | ATPase family AAA domain-containing protein 5       | 0.999 | 1.79                               | 2 | 2     |
|        |              |           |                                                     |       | EVIDLSESLAEELNFKK                  | 3 | 0.999 |
|        |              |           |                                                     |       | TLANYFKVSSKPK                      | 3 | 0.999 |
| E1BCH1 | E1BCH1_BOVIN | MAPKBP1   | Mitogen-activated protein kinase-binding protein 1  | 0.999 | 3.13                               | 2 | 2     |
|        |              |           |                                                     |       | EYSLQQLTDEHSSSITAVKFAASDGQVR       | 3 | 0.999 |
|        |              |           |                                                     |       | GSEKHSPPDSACSVDFSSSR               | 3 | 0.999 |
| E1BCJ1 | E1BCJ1_BOVIN | ATP6V1B1  | V-type proton ATPase subunit B, kidney isoform      | 0.999 | 15.79                              | 3 | 3     |
|        |              |           |                                                     |       | GLPGGGASLGAAREHVQAVTRNYTHPR        | 3 | 0.999 |
|        |              |           |                                                     |       | IYPEEMIEGTGISPIDVMNSIAR            | 3 | 0.999 |
|        |              |           |                                                     |       | QVASPLYPLPSLSTISKNDYMSPTAPQPK      | 3 | 0.999 |
| E1BCY7 | E1BCY7_BOVIN | Bt.45696  | Tyrosine-protein kinase Sgk223                      | 1.000 | 3.34                               | 2 | 2     |
|        |              |           |                                                     |       | GPPSQQAEPAGGEEPSAGQGLSRESRHR       | 3 | 0.999 |
|        |              |           |                                                     |       | VGCLPPPPRLHPRPESDR                 | 3 | 0.999 |
| E1BCZ9 | E1BCZ9_BOVIN | ADNP      | ADNP homeobox protein 2                             | 0.999 | 3.9                                | 2 | 2     |
|        |              |           |                                                     |       | IFHAPNASAPSSSLSTFKDK               | 3 | 0.999 |
|        |              |           |                                                     |       | TQAPARYSLQSPNAPSLSGGQLK            | 3 | 0.999 |
| E1BD77 | E1BD77_BOVIN | ZFH2      | Zinc finger homeobox protein 2                      | 1.000 | 2.26                               | 2 | 2     |
|        |              |           |                                                     |       | EGGTLPALGGSPEDPGDPAQPYR            | 3 | 0.999 |
|        |              |           |                                                     |       | NASDGGPAPSGGGTGGAGCRRCHATFSCVFDLVR | 3 | 0.999 |
| Q3B7M1 | KLH36_BOVIN  | KLHL36    | Kelch-like protein 36                               | 0.999 | 7.79                               | 2 | 2     |
| E1BDD0 | E1BDD0_BOVIN | KLHL36    | Uncharacterized protein                             | 0.999 | 7.8                                | 2 | 2     |
|        |              |           |                                                     |       | CLELSDDTCYLDAQSEQVWK               | 3 | 0.999 |
|        |              |           |                                                     |       | FTYGHAGTIYKDFVYISGGHDYQIGPYR       | 3 | 0.999 |
| E1BDN7 | E1BDN7_BOVIN | JAG1      | Protein jagged-1                                    | 0.999 | 3.45                               | 2 | 2     |
|        |              |           |                                                     |       | PGSHARAASEDNTTNNVREQLNQIK          | 3 | 0.999 |
|        |              |           |                                                     |       | TCMEGWMGPECNKAICR                  | 3 | 0.999 |
| E1BDU8 | E1BDU8_BOVIN | Bt.58516  | LIM domain and actin-binding protein 1              | 0.999 | 4.99                               | 2 | 2     |
|        |              |           |                                                     |       | KFOAPARETCVEQCK                    | 3 | 0.999 |
|        |              |           |                                                     |       | WENPVLGADSLPDSVRNSSAEVR            | 3 | 0.999 |
| E1BDV8 | E1BDV8_BOVIN | DPY19L3   | Protein dpy-19 homolog 3                            | 0.999 | 5.3                                | 2 | 2     |
|        |              |           |                                                     |       | QMLQAPTLMQGFRGLYDNK                | 3 | 0.999 |
|        |              |           |                                                     |       | SFGTDYVILEDSICYERR                 | 3 | 0.999 |
| E1BE11 | E1BE11_BOVIN | Bt.37052  | Hemicentin-1                                        | 1.000 | 1.32                               | 3 | 3     |
|        |              |           |                                                     |       | KCVDINECRQNVCR                     | 3 | 0.999 |
|        |              |           |                                                     |       | MSWLRDGRPLGLDAHLSISSQGMVLQLIK      | 3 | 0.999 |
|        |              |           |                                                     |       | SDGSLHIERVRLQDGGEYTCVASNAVAGITNK   | 3 | 0.830 |
| E1BE13 | E1BE13_BOVIN | BIRC6     | Baculoviral IAP repeat-containing protein 6         | 0.999 | 1.03                               | 2 | 2     |
|        |              |           |                                                     |       | KSDISTLGHVITVQGGYVK                | 3 | 0.999 |
|        |              |           |                                                     |       | TCPVESLSAINQVEALNNLNLSALCNRR       | 3 | 0.999 |
| E1BE19 | E1BE19_BOVIN | AHDC1     | AT-hook DNA-binding motif-containing protein 1      | 0.999 | 2.5                                | 2 | 2     |
|        |              |           |                                                     |       | EPVVVAEEAATATASMAMPEVK             | 3 | 0.999 |
|        |              |           |                                                     |       | LDLCSPPHPPGPEGHPK                  | 3 | 0.999 |
| E1BE25 | E1BE25_BOVIN | FLNC      | Filamin-C                                           | 1.000 | 2.72                               | 3 | 3     |
|        |              |           |                                                     |       | ARVPOTFTVDCSQAGR                   | 3 | 0.999 |
|        |              |           |                                                     |       | LTVTSLQETGLKVNQASFAVLNARGVIDAR     | 3 | 0.999 |
|        |              |           |                                                     |       | VVTRGPGLSQAQFVGQKNSFTVDCSK         | 3 | 0.845 |
| E1BE29 | E1BE29_BOVIN | RYR2      | Ryanodine receptor 2                                | 1.000 | 0.89                               | 2 | 2     |
| E1BHV1 | E1BHV1_BOVIN | RYR2      | Uncharacterized protein                             | 1.000 | 0.9                                | 2 | 2     |
|        |              |           |                                                     |       | GSTPLDVAASVMDNNLALALREPDLEKVVVR    | 3 | 0.999 |
|        |              |           |                                                     |       | LSKGCSLTKAQR                       | 3 | 0.999 |
| E1BE63 | E1BE63_BOVIN | Bt.103153 | Uncharacterized protein                             | 0.999 | 6.49                               | 3 | 3     |
| E1BFX6 | E1BFX6_BOVIN | Bt.103153 | Uncharacterized protein                             | 0.999 | 6.89                               | 3 | 3     |
| E1BHD6 | E1BHD6_BOVIN | Bt.103153 | Putative RNA-binding protein 15                     | 0.999 | 6.44                               | 3 | 3     |
|        |              |           |                                                     |       | DSYPPASVVGSSVSGHRHPPGGGGGQQR       | 3 | 0.999 |
|        |              |           |                                                     |       | LWVGGGLGPWWPLAALAREFDR             | 3 | 0.999 |
|        |              |           |                                                     |       | SSRLLLERPSPIR                      | 3 | 0.852 |
| E1BEK7 | E1BEK7_BOVIN | TTLL7     | Tubulin polyglutamylase TTLL7                       | 0.999 | 3.16                               | 2 | 2     |
|        |              |           |                                                     |       | PANGAMGHGSLIR                      | 3 | 0.999 |
|        |              |           |                                                     |       | PLSSMPESTEIMKR                     | 3 | 0.999 |
| E1BEW9 | E1BEW9_BOVIN | WDR87     | WD repeat-containing protein 87                     | 1.000 | 1.04                               | 2 | 2     |
|        |              |           |                                                     |       | ETFREMOEQEMVGDTELDR                | 3 | 0.999 |
|        |              |           |                                                     |       | LPGEEELTEKR                        | 3 | 0.999 |
| E1BF46 | E1BF46_BOVIN | ZNF407    | Zinc finger protein 407                             | 0.999 | 2.76                               | 2 | 2     |
|        |              |           |                                                     |       | DDASTDENRCHCEFKAHSSTSLHLVK         | 3 | 0.999 |
|        |              |           |                                                     |       | SSQSFNGDSALQTFPLSTLESENKAVSVSEAGK  | 3 | 0.999 |
| E1BF59 | E1BF59_BOVIN | PLEC      | Plectin                                             | 0.999 | 1.14                               | 3 | 3     |
|        |              |           |                                                     |       | LQNVQIALDYLRHRQVK                  | 3 | 0.999 |
|        |              |           |                                                     |       | LRGTPRHPELEDSTLR                   | 3 | 0.999 |
|        |              |           |                                                     |       | QVQVALETAQRSQAQELQSK               | 3 | 0.999 |
| E1BF85 | E1BF85_BOVIN | GARNL3    | GTPase-activating Rap/Ran-GAP domain-like protein 3 | 0.999 | 4.53                               | 2 | 2     |
|        |              |           |                                                     |       | TKGCHLYAINTHHKELR                  | 3 | 0.999 |
|        |              |           |                                                     |       | VNFVAIVIDVYEDGEALLLCYNYSYCIYKK     | 3 | 0.999 |
| E1BF91 | E1BF91_BOVIN | Q58CX6    | Alpha-tubulin N-acetyltransferase                   | 0.999 | 9.5                                | 2 | 2     |
|        |              |           |                                                     |       | LCPHPHTARLLLATDPGGSPAQR            | 3 | 0.999 |
|        |              |           |                                                     |       | TSGTTPPGLVAQSCYSYR                 | 3 | 0.999 |
| E1BFB0 | E1BFB0_BOVIN | SPTAN1    | Spectrin alpha chain, brain                         | 1.000 | 3.03                               | 4 | 4     |
|        |              |           |                                                     |       | ALINADELANDVAGAEALLDR              | 3 | 0.999 |
|        |              |           |                                                     |       | DLTSWVTEMKALINADELANDVAGAEALLDR    | 3 | 0.999 |
|        |              |           |                                                     |       | FMLFREANELQGWINEK                  | 3 | 0.999 |
|        |              |           |                                                     |       | QQVAPMDDDETGKELVLALYDYQEKSPR       | 3 | 0.999 |
| E1BFB4 | E1BFB4_BOVIN | MTOR      | Serine/threonine-protein kinase mTOR                | 0.999 | 2.08                               | 2 | 2     |
|        |              |           |                                                     |       | ELLEPLAVGLSPALTAVLYDLRSRQIPQLKK    | 3 | 0.999 |
|        |              |           |                                                     |       | SLVVSHPHEDMRTWLKYASLCGK            | 3 | 0.999 |
| E1BFH7 | E1BFH7_BOVIN | SMC6      | Structural maintenance of chromosomes protein 6     | 0.999 | 3.45                               | 2 | 2     |
|        |              |           |                                                     |       | FRQFILLTPQSMSSLPSSKLIR             | 3 | 0.999 |
|        |              |           |                                                     |       | TKEQINGEERLSELK                    | 3 | 0.999 |

|        |              |              |                                                                     |       |                                 |   |       |
|--------|--------------|--------------|---------------------------------------------------------------------|-------|---------------------------------|---|-------|
| E1BFM5 | E1BFM5_BOVIN |              | Uncharacterized protein                                             | 0.999 | 3.74                            | 3 | 3     |
| F1MGK2 | F1MGK2_BOVIN |              | Uncharacterized protein                                             | 0.999 | 3.6                             | 3 | 3     |
| G3MWW2 | G3MWW2_BOVIN | TET1         | Methylcytosine dioxygenase TET1                                     | 0.999 | 3.67                            | 3 | 3     |
|        |              |              |                                                                     |       | DTANHNNVMSTIASASCDHLKGSNVLVIQK  | 3 | 0.999 |
|        |              |              |                                                                     |       | ITLDSRNQLQLTTITSK               | 3 | 0.999 |
|        |              |              |                                                                     |       | TGHHCPTAVMVLVIMWWDGIPLPMADK     | 3 | 0.999 |
| E1BFW7 | E1BFW7_BOVIN | Bt.33460     | DNA-binding protein RFX7                                            | 0.999 | 2.74                            | 2 | 2     |
|        |              |              |                                                                     |       | SHYIGTKSMAALTVMAAAPPGIK         | 3 | 0.999 |
|        |              |              |                                                                     |       | TRQLVTSPPMSSSDGK                | 3 | 0.999 |
| E1BG53 | E1BG53_BOVIN | Bt.63860     | Peroxisome proliferator-activated receptor gamma coactivator 1-beta | 0.984 | 3.92                            | 2 | 2     |
|        |              |              |                                                                     |       | EDEEAGEDCPSPQLAPASPGDSPALGR     | 3 | 0.872 |
|        |              |              |                                                                     |       | EEDGSCDVGAPTK                   | 3 | 0.871 |
| E1BG99 | E1BG99_BOVIN | EIF4ENIF1    | Eukaryotic translation initiation factor 4E transporter             | 1.000 | 5.79                            | 3 | 3     |
|        |              |              |                                                                     |       | TPTLASVPVPGTFFLR                | 3 | 0.999 |
|        |              |              |                                                                     |       | TPTLASVPVPGTFFLRPVHQVPLVPHVPIVR | 3 | 0.999 |
|        |              |              |                                                                     |       | VDQQVKNSTPFMAEHLEETLSTVASNR     | 3 | 0.999 |
| E1BGB2 | E1BGB2_BOVIN | Bt.103069    | Protein PRRC2B                                                      | 1.000 | 2.02                            | 2 | 2     |
|        |              |              |                                                                     |       | LHSWASGPDYQQKSSMGTVFR           | 3 | 0.845 |
|        |              |              |                                                                     |       | RDHIIQIRAIGLSHMSFPTADLTLK       | 3 | 0.999 |
| E1BGF3 | E1BGF3_BOVIN | HCFC1        | Host cell factor 1                                                  | 0.999 | 1.8                             | 2 | 2     |
|        |              |              |                                                                     |       | SGTVTVAAQQAQVVTTVVGGVTK         | 3 | 0.999 |
|        |              |              |                                                                     |       | VASSPVMVSNPATR                  | 3 | 0.999 |
| E1BGJ0 | E1BGJ0_BOVIN | Bt.854       | Prolow-density lipoprotein receptor-related protein 1               | 1.000 | 1.03                            | 2 | 2     |
|        |              |              |                                                                     |       | MLTPLLLLPLLSALVAAVDVPKTCSPK     | 3 | 0.859 |
|        |              |              |                                                                     |       | RELLGRGPEDEIGDPLA               | 3 | 1.000 |
| E1BGY9 | E1BGY9_BOVIN | JPH3         | Junctophilin-3                                                      | 1.000 | 5.84                            | 2 | 2     |
|        |              |              |                                                                     |       | HGYGCMFFPDGKKEEGKYK             | 3 | 0.999 |
|        |              |              |                                                                     |       | LSNYEMEMKPLLRLMDSYAQDMHPPK      | 3 | 0.999 |
| F1MVK1 | F1MVK1_BOVIN |              | Uncharacterized protein (Fragment)                                  | 0.999 | 2.22                            | 2 | 2     |
| E1BH06 | E1BH06_BOVIN | Bt.105154    | Uncharacterized protein                                             | 0.999 | 2.01                            | 2 | 2     |
| P01030 | CO4_BOVIN    | C4           | Complement C4 (Fragments)                                           | 0.999 | 3.8                             | 2 | 2     |
|        |              |              |                                                                     |       | LGQYTSVPAK                      | 2 | 0.988 |
|        |              |              |                                                                     |       | LPQGCAEQMTLLAPTLAASRYLDK        | 3 | 0.999 |
| E1BH49 | E1BH49_BOVIN | LOC100140733 | Uncharacterized protein                                             | 1.000 | 0.77                            | 2 | 2     |
| F1MB15 | F1MB15_BOVIN | FSIP2        | Fibrous sheath-interacting protein 2                                | 1.000 | 0.77                            | 2 | 2     |
|        |              |              |                                                                     |       | AKELEYSLLLLLPHLEDNENRFSYCFK     | 3 | 0.999 |
|        |              |              |                                                                     |       | PQTPAAAGIYTETVREIVARLLSK        | 3 | 0.999 |
| E1BHF2 | E1BHF2_BOVIN | Bt.104141    | Uncharacterized protein                                             | 0.976 | 9.18                            | 2 | 2     |
| F1MAX6 | F1MAX6_BOVIN | Bt.104141    | Katanin p60 ATPase-containing subunit A-like 1                      | 0.976 | 9.02                            | 2 | 2     |
|        |              |              |                                                                     |       | QELLEEEYQVKSIVSTLESFK           | 3 | 0.833 |
|        |              |              |                                                                     |       | RVKSELLIQMDGVGGALENDDPSK        | 3 | 0.816 |
| E1BHF6 | E1BHF6_BOVIN | SIPA1L3      | Signal-induced proliferation-associated 1-like protein 3            | 0.999 | 1.73                            | 2 | 2     |
|        |              |              |                                                                     |       | AAAGSPSGGGGGGEVFR               | 3 | 0.999 |
|        |              |              |                                                                     |       | RGWPETYDMNTSEPK                 | 3 | 0.999 |
| E1BHM6 | E1BHM6_BOVIN | Bt.88468     | Uncharacterized protein                                             | 0.999 | 2.47                            | 2 | 2     |
| E1BI61 | E1BI61_BOVIN | Bt.88468     | Sodium channel protein type 11 subunit alpha                        | 0.999 | 2.46                            | 2 | 2     |
|        |              |              |                                                                     |       | CYPVIFPDGRNFR                   | 3 | 0.999 |
|        |              |              |                                                                     |       | LHCLDILFAFTTRVLGESSGLDSMKAAIEEK | 3 | 0.999 |
| E1BI97 | E1BI97_BOVIN | C13ORF40     | Coiled-coil domain-containing protein 168                           | 1.000 | 3.44                            | 4 | 4     |
|        |              |              |                                                                     |       | DYESERLDYFPSSKYK                | 3 | 0.999 |
|        |              |              |                                                                     |       | LPPQAEPIVLTNLTDLQGTGKTKGK       | 3 | 0.999 |
|        |              |              |                                                                     |       | RLDAGIKELLESSGTGK               | 3 | 0.999 |
|        |              |              |                                                                     |       | VDSSGESGGHSINTQPLEHIPFK         | 3 | 0.883 |
| E1BIN0 | E1BIN0_BOVIN | FHOD1        | FH1/FH2 domain-containing protein 1                                 | 1.000 | 3.18                            | 2 | 2     |
| G3MYQ1 | G3MYQ1_BOVIN | FHOD1        | Uncharacterized protein                                             | 1.000 | 4.12                            | 2 | 2     |
|        |              |              |                                                                     |       | PDSSDLYSEIPALARCAK              | 3 | 0.999 |
|        |              |              |                                                                     |       | SPFPPTPPPPPAAPLPHSAPDGPALPTKR   | 3 | 0.815 |
| E1BIR8 | E1BIR8_BOVIN | FLG2         | Filaggrin-2                                                         | 0.999 | 2.44                            | 3 | 3     |
|        |              |              |                                                                     |       | GRHGTAHGQSGDTSRHDHSR            | 3 | 0.999 |
|        |              |              |                                                                     |       | HGSSSEELASARQKHGSSSK            | 3 | 0.999 |
|        |              |              |                                                                     |       | NOHGSSQGTGDSRRHSHSQGRHNSGR      | 3 | 0.999 |
| E1BIU4 | E1BIU4_BOVIN | ZC3H7B       | Zinc finger CCCH domain-containing protein 7B                       | 1.000 | 4.92                            | 2 | 2     |
|        |              |              |                                                                     |       | KYWQQMEAHTKASSSLGAPR            | 3 | 0.999 |
|        |              |              |                                                                     |       | PAPSPPEMPNTALLIKNPLAATHEFK      | 3 | 0.821 |
| E1BIU8 | E1BIU8_BOVIN | PTPRS        | Receptor-type tyrosine-protein phosphatase S                        | 1.000 | 1.88                            | 2 | 2     |
|        |              |              |                                                                     |       | DENVYECVAQNSVGEITVHAK           | 3 | 0.999 |
|        |              |              |                                                                     |       | QYGGFDNRGLPEGHR                 | 3 | 0.999 |
| E1BJ11 | E1BJ11_BOVIN | CELSR2       | Cadherin EGF LAG seven-pass G-type receptor 2                       | 0.999 | 1.64                            | 2 | 2     |
|        |              |              |                                                                     |       | LERQYVLAVTASDTR                 | 3 | 0.999 |
|        |              |              |                                                                     |       | STITLQLREGRVLSVEGTGLQASSLQLEPGR | 3 | 0.999 |
| E1BJC1 | E1BJC1_BOVIN | OSBPL11      | Oxysterol-binding protein-related protein 11                        | 0.999 | 5.15                            | 2 | 2     |
|        |              |              |                                                                     |       | LHRVTGEVKHNITNTVCR              | 3 | 0.999 |
|        |              |              |                                                                     |       | NSSNSCGGGISSSSSSSR              | 3 | 0.999 |
| E1BJV9 | E1BJV9_BOVIN | Bt.40077     | Actin filament-associated protein 1-like 2                          | 0.999 | 6.21                            | 2 | 2     |
|        |              |              |                                                                     |       | LSSERPSSDGEVANGIAMCNKEQVK       | 3 | 0.999 |
|        |              |              |                                                                     |       | NRGLGEEALYDNAVLDNLPSPK          | 3 | 0.999 |
| E1BJW7 | E1BJW7_BOVIN | VPS53        | Vacuolar protein sorting-associated protein 53 homolog              | 0.999 | 5.17                            | 2 | 2     |
|        |              |              |                                                                     |       | GQTNVQDGRQALEEAQK               | 3 | 0.999 |
|        |              |              |                                                                     |       | QHLSEYLVLFQENQDVAWLKIDRRR       | 3 | 0.999 |
| E1BK68 | E1BK68_BOVIN | FBXO41       | F-box only protein 41                                               | 0.999 | 6.84                            | 2 | 2     |
|        |              |              |                                                                     |       | EGLKGLEMLVLTATVPTKALLHFNISICR   | 3 | 0.999 |
|        |              |              |                                                                     |       | MREHHAGPAMPSTYAVSRHGSSPSTGASSR  | 3 | 0.999 |
| E1BK89 | E1BK89_BOVIN | LCT          | Lactase-phlorizin hydrolase                                         | 0.999 | 1.76                            | 2 | 2     |
|        |              |              |                                                                     |       | QCPSVAQLPEFTEAEK                | 3 | 0.999 |
|        |              |              |                                                                     |       | QKHTQPGEQLSHRSSF                | 3 | 0.999 |
| E1BK87 | E1BK87_BOVIN | MGA          | MAX gene associated                                                 | 1.000 | 1.3                             | 2 | 2     |
|        |              |              |                                                                     |       | EESKVEFGSRVAEQSNPK              | 3 | 0.999 |
|        |              |              |                                                                     |       | MFPYCRYWITGLDSNMK               | 3 | 0.999 |
| E1BKN0 | E1BKN0_BOVIN | Bt.8035      | Histone-lysine N-methyltransferase MLL4                             | 1.000 | 2.25                            | 3 | 3     |
|        |              |              |                                                                     |       | DALAPGPFASFPPNGWTGKQK           | 3 | 0.999 |
|        |              |              |                                                                     |       | GGGAAGPGGAEPGEDTALLRLLGLHR      | 3 | 0.999 |
|        |              |              |                                                                     |       | HAYHPACLGPSYPTR                 | 3 | 0.999 |
| E1BKN6 | E1BKN6_BOVIN | ANKRD12      | Uncharacterized protein                                             | 0.999 | 1.76                            | 2 | 2     |
|        |              |              |                                                                     |       | DRFNARQFMSWLQDQDDK              | 3 | 0.999 |
|        |              |              |                                                                     |       | VSRVPOPVQVSPSLQAK               | 3 | 0.999 |
| E1BKQ9 | E1BKQ9_BOVIN | GALNT5       | Uncharacterized protein                                             | 0.999 | 4.57                            | 2 | 2     |
|        |              |              |                                                                     |       | DPKAPGQFGRPVVPHGK               | 3 | 0.999 |
|        |              |              |                                                                     |       | TPFIAARGTPLAKISVHTGPGVINK       | 3 | 0.999 |
| E1BKS0 | E1BKS0_BOVIN | Bt.105467    | Uncharacterized protein                                             | 0.999 | 5.19                            | 2 | 2     |
|        |              |              |                                                                     |       | MSTTSGPEASLKQSAK                | 3 | 0.999 |
|        |              |              |                                                                     |       | PPSGAEYDVLQKIKYAFSLAR           | 3 | 0.888 |
| E1BKW7 | E1BKW7_BOVIN |              | Uncharacterized protein                                             | 0.999 | 1.29                            | 2 | 2     |
|        |              |              |                                                                     |       | ELSKTDGMSTQLNVACK               | 3 | 0.999 |
|        |              |              |                                                                     |       | LMETLGAEPYFKICR                 | 3 | 0.999 |
| E1BL04 | E1BL04_BOVIN | XIRP2        | Uncharacterized protein                                             | 0.999 | 2.25                            | 4 | 4     |
|        |              |              |                                                                     |       | KGILIQEDERGDINMTIYCLLHENAGDTIK  | 3 | 0.999 |
|        |              |              |                                                                     |       | NIKQESRSFK                      | 3 | 0.894 |
|        |              |              |                                                                     |       | VEAPGIIIEADEVDGVRMAKYK          | 3 | 0.873 |

|        |              |           |                                    |       |                                    |   |       |
|--------|--------------|-----------|------------------------------------|-------|------------------------------------|---|-------|
| E1BLB4 | E1BLB4_BOVIN | Bt.67656  | Uncharacterized protein (Fragment) | 1.000 | WLFETQPLDSIKHFSNMEEVER             | 3 | 0.999 |
|        |              |           |                                    |       | 2.23                               | 4 | 4     |
|        |              |           |                                    |       | GNALLVGVGGSGKQSLRSLAAYISALDVFQITLK | 3 | 0.999 |
|        |              |           |                                    |       | SCGNIYKGLAQTGAWGCFDEFNR            | 3 | 0.999 |
|        |              |           |                                    |       | SIAAMESIMDALCKSGSLFEVSPDYK         | 3 | 0.999 |
|        |              |           |                                    |       | SWPVMLVGNAGTGK                     | 3 | 0.830 |
| E1BLD1 | E1BLD1_BOVIN | Bt.76331  | Uncharacterized protein            | 0.999 | 1.88                               | 2 | 2     |
|        |              |           |                                    |       | DCLYIWSDAALELSNGSNGWFRFILDGK       | 3 | 0.999 |
|        |              |           |                                    |       | MGCWSIEHVEQYLGTDLPK                | 3 | 0.999 |
| E1BM04 | E1BM04_BOVIN | TBKBP1    | Uncharacterized protein            | 0.999 | 5.85                               | 2 | 2     |
|        |              |           |                                    |       | AQDLASNQSERDMAWVKR                 | 3 | 0.999 |
|        |              |           |                                    |       | VSLQQRNLNQFQHELQKNK                | 3 | 0.999 |
| E1BM25 | E1BM25_BOVIN | C10orf93  | Uncharacterized protein            | 0.999 | 1.95                               | 2 | 2     |
|        |              |           |                                    |       | GFDFGWHSGVSGKK                     | 3 | 0.999 |
|        |              |           |                                    |       | IKTYTREAVELQFLAER                  | 3 | 0.999 |
| E1BM83 | E1BM83_BOVIN | FAM179B   | Uncharacterized protein            | 1.000 | 2.6                                | 2 | 2     |
|        |              |           |                                    |       | ALFTQMGNLLNQAASQPSHIK              | 3 | 0.999 |
|        |              |           |                                    |       | SSYSGPNSSSGAVLLPSYPLSSPR           | 3 | 0.999 |
| E1BMF6 | E1BMF6_BOVIN |           | Uncharacterized protein            | 0.999 | 2.67                               | 2 | 2     |
|        |              |           |                                    |       | ELMDKFLRVNFSK                      | 3 | 0.999 |
|        |              |           |                                    |       | FLRVNFSKGCPLFTTLK                  | 3 | 0.999 |
| E1BMG2 | E1BMG2_BOVIN | Bt.65326  | Uncharacterized protein            | 1.000 | 2.34                               | 5 | 5     |
|        |              |           |                                    |       | HLMFYQDVEVETGQLGSPGGVNSVSGMKM      | 3 | 0.866 |
|        |              |           |                                    |       | LKVIQLFETOR                        | 3 | 1.000 |
|        |              |           |                                    |       | LTSTQGSLEVESLILVLSKTKK             | 3 | 0.871 |
|        |              |           |                                    |       | MGTTYGPPAGKK                       | 2 | 0.913 |
|        |              |           |                                    |       | PLLIEDVGEELDPALDNVLERNFIKTGSTFK    | 3 | 0.999 |
| E1BMG8 | E1BMG8_BOVIN | DOCK4     | Uncharacterized protein            | 0.999 | 2.79                               | 2 | 2     |
|        |              |           |                                    |       | SDPNLSAPEKAVNPTSPSSWLDGSKKEAK      | 3 | 0.999 |
|        |              |           |                                    |       | SVLEEDIVIVASLLDILLRTILEITSR        | 3 | 0.999 |
| E1BMH5 | E1BMH5_BOVIN | Bt.60929  | Uncharacterized protein            | 0.999 | 3.82                               | 2 | 2     |
| E1BMT0 | E1BMT0_BOVIN | Bt.60929  | Uncharacterized protein            | 0.999 | 3.82                               | 2 | 2     |
| F1MXC3 | F1MXC3_BOVIN | Bt.60929  | Uncharacterized protein            | 0.999 | 3.82                               | 2 | 2     |
| Q27ID4 | TERT_BOVIN   | TERT      | Telomerase reverse transcriptase   | 0.999 | 3.82                               | 2 | 2     |
|        |              |           |                                    |       | IWSQLQRLGVRQHLDR                   | 3 | 0.999 |
|        |              |           |                                    |       | RSFLLCSLPPSLAGARTLVETIFLDSK        | 3 | 0.999 |
| E1BMN2 | E1BMN2_BOVIN | DIAPH3    | Uncharacterized protein            | 0.977 | 4.06                               | 2 | 2     |
|        |              |           |                                    |       | IFPPPEDLHDKFVTKMSIFVISA            | 3 | 0.866 |
|        |              |           |                                    |       | LIDECVSQLVHRDGMDFTYRK              | 3 | 0.831 |
| E1BMN9 | E1BMN9_BOVIN | BSN       | Uncharacterized protein            | 0.999 | 2.6                                | 4 | 4     |
|        |              |           |                                    |       | PAAAKGPGTGGPPPELPAGAAR             | 3 | 0.999 |
|        |              |           |                                    |       | PSRASEPSRTPSAQEK                   | 3 | 0.999 |
|        |              |           |                                    |       | QPVVYGDPPQSRDLDFGQGAGSPVCLAQVK     | 3 | 0.999 |
|        |              |           |                                    |       | TAGTAPPKQKQPGQLGQSPGPPPAK          | 3 | 0.999 |
| E1BMP2 | E1BMP2_BOVIN | SEC31A    | Uncharacterized protein            | 1.000 | 2.93                               | 2 | 2     |
|        |              |           |                                    |       | FASSPLRVLENHAR                     | 3 | 0.999 |
|        |              |           |                                    |       | LLTLGVNESEHYLSNINFSK               | 3 | 0.999 |
| E1BMP8 | E1BMP8_BOVIN | SBNO1     | Uncharacterized protein            | 0.999 | 6.16                               | 3 | 3     |
|        |              |           |                                    |       | AGFLIGDAGVGGKRTIAGIYENYLLSR        | 3 | 0.999 |
|        |              |           |                                    |       | DVRQGLIGVGLINVEDRSGILTLDK          | 3 | 0.999 |
|        |              |           |                                    |       | LAEDLPPNLTDELDELGGPENVAEMTRKGR     | 3 | 0.999 |
| E1BMR3 | E1BMR3_BOVIN | RBL1      | Uncharacterized protein            | 0.999 | 5.24                               | 2 | 2     |
|        |              |           |                                    |       | IAPSSSITAEINISIPGSHLLTATAIVAGTTGHK | 3 | 0.999 |
|        |              |           |                                    |       | QQPGSPRRISQOHSIYVSPHK              | 3 | 0.999 |
| E1BN35 | E1BN35_BOVIN | CYP27B1   | Uncharacterized protein            | 0.999 | 4.13                               | 2 | 2     |
|        |              |           |                                    |       | PQAAARYAGTLHGVRDLVR                | 3 | 0.999 |
|        |              |           |                                    |       | YAGTLHGVRDLVRR                     | 3 | 0.999 |
| E1BNC2 | E1BNC2_BOVIN | KCTD3     | Uncharacterized protein            | 0.999 | 5.87                               | 2 | 2     |
|        |              |           |                                    |       | FRGMISTQPGSTPLASF                  | 3 | 0.999 |
|        |              |           |                                    |       | LLDQCDLSTSRCATPNISPATSVVQHSRLR     | 3 | 0.999 |
| E1BNC3 | E1BNC3_BOVIN | Bt.80160  | Uncharacterized protein            | 0.999 | 1.76                               | 2 | 2     |
| F1N2K7 | F1N2K7_BOVIN | PIKFYVE   | Uncharacterized protein            | 0.999 | 1.76                               | 2 | 2     |
|        |              |           |                                    |       | NRSASITNLSLDR                      | 3 | 0.999 |
|        |              |           |                                    |       | THPNCIVGKELVNWLRNGHIATR            | 3 | 0.999 |
| E1BND5 | E1BND5_BOVIN | NCOA6     | Uncharacterized protein            | 0.999 | 2.24                               | 2 | 2     |
|        |              |           |                                    |       | LDTILENVPNLLHMGDOESSKLVQK          | 3 | 0.999 |
|        |              |           |                                    |       | PPGLTDLVETPPGVSGEDPK               | 3 | 0.999 |
| E1BNF6 | E1BNF6_BOVIN | Bt.5804   | Uncharacterized protein (Fragment) | 1.000 | 1.64                               | 3 | 3     |
| F1MRK2 | F1MRK2_BOVIN | Bt.5804   | Uncharacterized protein (Fragment) | 1.000 | 1.64                               | 3 | 3     |
|        |              |           |                                    |       | QQEDO EKAL TASKGK                  | 3 | 0.999 |
|        |              |           |                                    |       | TAGEKTGEGPPVPEEKTIEPASVPEEAK       | 3 | 0.999 |
|        |              |           |                                    |       | TLFIGNLEKTTTYHDLR                  | 3 | 0.999 |
| E1BNF9 | E1BNF9_BOVIN | Bt.103903 | Uncharacterized protein            | 0.999 | 16.55                              | 2 | 2     |
|        |              |           |                                    |       | LATVVEPEKEGHPATIMVTPDR             | 3 | 0.999 |
|        |              |           |                                    |       | PIQAGSFCADPGYPLEKASTSFCLLAK        | 3 | 0.999 |
| E1BNH7 | E1BNH7_BOVIN | Bt.105989 | Uncharacterized protein            | 0.999 | 5.21                               | 3 | 3     |
|        |              |           |                                    |       | MDFSFSFMQGMGNTIQPPQLIDSANIR        | 3 | 0.812 |
|        |              |           |                                    |       | PSPPPPPPPPSVPQTVIPK                | 3 | 0.999 |
|        |              |           |                                    |       | TEPKLHEDFCFCQGDGGLVMCDR            | 3 | 0.999 |
| E1BNJ1 | E1BNJ1_BOVIN | Bt.53716  | Uncharacterized protein            | 1.000 | 1.13                               | 2 | 2     |
|        |              |           |                                    |       | DHRDKLAAILR                        | 3 | 0.999 |
|        |              |           |                                    |       | WWTLAGOEITVSFRFRK                  | 3 | 0.999 |
| E1BNV7 | E1BNV7_BOVIN | Bt.1774   | Uncharacterized protein            | 0.999 | 3.33                               | 3 | 3     |
|        |              |           |                                    |       | GSSSSGPEELGLVEEEAAGGDEDR           | 3 | 0.999 |
|        |              |           |                                    |       | SNLKTMYSVPNK                       | 3 | 0.999 |
|        |              |           |                                    |       | TEMEMAAPKKQVPPQAAAPSSLDGSEAGAGSPR  | 3 | 0.999 |
| E1BNY8 | E1BNY8_BOVIN | GTF3C1    | Uncharacterized protein            | 0.999 | 2.15                               | 2 | 2     |
|        |              |           |                                    |       | DFGFGWALVSDLLCLPLSIFTQVVQVSYK      | 3 | 0.999 |
|        |              |           |                                    |       | YDILMEKLLSLSAR                     | 3 | 0.999 |
| E1BNZ0 | E1BNZ0_BOVIN | KNDC1     | Uncharacterized protein            | 0.999 | 2.1                                | 2 | 2     |
| G3N205 | G3N205_BOVIN | KNDC1     | Uncharacterized protein            | 0.999 | 2.08                               | 2 | 2     |
|        |              |           |                                    |       | PPADODRGLDK                        | 3 | 0.999 |
|        |              |           |                                    |       | SADDGSTWVAEIVTSHTSK                | 3 | 0.999 |
| E1BP53 | E1BP53_BOVIN | PIP5K1C   | Uncharacterized protein (Fragment) | 0.999 | 8.08                               | 2 | 2     |
|        |              |           |                                    |       | SIPTYKDLDFIQDMPEGLMDADTFALVK       | 3 | 0.826 |
|        |              |           |                                    |       | VSPSVPLMTGQPGPGHGKGLGHR            | 3 | 0.999 |
| E1BP74 | E1BP74_BOVIN | Bt.59143  | Uncharacterized protein            | 0.999 | 2.58                               | 2 | 2     |
|        |              |           |                                    |       | EQGNRGLVCLLPSSQAR                  | 3 | 0.802 |
|        |              |           |                                    |       | LIELLEAVPHVLOILGMGSKRLLTLTHR       | 3 | 0.999 |
| E1BP91 | E1BP91_BOVIN | NPEPPS    | Uncharacterized protein            | 0.999 | 5.43                               | 2 | 2     |
|        |              |           |                                    |       | LLFLGPPPPPLLLLLSRSSR               | 3 | 0.999 |
|        |              |           |                                    |       | QILSADLRSVYLVTLKHGDGTTLDIMLK       | 3 | 0.999 |
| E1BPD7 | E1BPD7_BOVIN | MKI67     | Uncharacterized protein            | 0.999 | 2.32                               | 3 | 3     |
|        |              |           |                                    |       | PQQTPEITHTSPREPEDGDRGTAVSQEAPEEK   | 3 | 0.999 |
|        |              |           |                                    |       | PTHPTGVTTHSPKEPEGDRGAAVSR          | 3 | 0.999 |
|        |              |           |                                    |       | PVAHGEDVTATHAVSGR                  | 3 | 0.999 |
| E1BPN4 | E1BPN4_BOVIN | CHST3     | Uncharacterized protein            | 0.999 | 7.1                                | 2 | 2     |
|        |              |           |                                    |       | MEKGLSLPQDCRHFHLSLR                | 3 | 0.999 |
|        |              |           |                                    |       | RCGPLNMTLAAEACR                    | 3 | 0.999 |

|        |              |           |                                    |       |                                    |   |       |
|--------|--------------|-----------|------------------------------------|-------|------------------------------------|---|-------|
| E1BPS1 | E1BPS1_BOVIN | BRPF1     | Uncharacterized protein            | 0.999 | 3.63                               | 2 | 2     |
|        |              |           |                                    |       | NRESQMPSPHGGSPVGGPPQLPIMGSLRQR     | 3 | 0.999 |
|        |              |           |                                    |       | PMDFFTMKQNLAYR                     | 3 | 0.999 |
| E1BPS3 | E1BPS3_BOVIN | Bt.105149 | Uncharacterized protein            | 0.999 | 1.47                               | 2 | 2     |
| F1N6Q9 | F1N6Q9_BOVIN | Bt.105149 | Uncharacterized protein            | 0.999 | 1.48                               | 2 | 2     |
|        |              |           |                                    |       | PDTGTEEEFGGLVANSILLRNR             | 3 | 0.999 |
|        |              |           |                                    |       | VLIIIDLCLTPASKOTPLIDLLLEASPER      | 3 | 0.999 |
| E1BPS4 | E1BPS4_BOVIN | LOC522232 | Uncharacterized protein (Fragment) | 1.000 | 2.81                               | 2 | 2     |
|        |              |           |                                    |       | GLGEVDCKEIGDCVPGGAASPDLCPLALDYLR   | 3 | 0.999 |
|        |              |           |                                    |       | SDVSDIGSDNCSLADEEQTPRDCLGHR        | 3 | 0.999 |
| E9QB09 | E9QB09_BOVIN |           | Uncharacterized protein (Fragment) | 0.974 | 6.32                               | 2 | 2     |
|        |              |           |                                    |       | HEQDAGVRCGARTTLPLATAGTK            | 3 | 0.837 |
|        |              |           |                                    |       | HYCDHSEDAGVCSGRFVRLAGGDGPCSGR      | 3 | 0.844 |
| F1MB97 | F1MB97_BOVIN | Bt.5804   | Uncharacterized protein (Fragment) | 0.999 | 5.03                               | 2 | 2     |
|        |              |           |                                    |       | QQEEOEKALTASKGK                    | 3 | 0.999 |
|        |              |           |                                    |       | TLFIGNLEKTTTYHDLR                  | 3 | 0.999 |
| F1MC03 | F1MC03_BOVIN | Bt.59025  | Uncharacterized protein            | 0.999 | 2.29                               | 2 | 2     |
| F1MK79 | F1MK79_BOVIN | Bt.59025  | Uncharacterized protein            | 0.999 | 2.36                               | 2 | 2     |
| F1N4A0 | F1N4A0_BOVIN | Bt.59025  | Uncharacterized protein            | 0.999 | 2.19                               | 2 | 2     |
|        |              |           |                                    |       | SQGNVSSGQICPSTFPRLGQLSLTSLPSAESR   | 3 | 0.999 |
|        |              |           |                                    |       | YPSMSATPVIPDSVTSVPPKSER            | 3 | 0.999 |
| F1MC11 | F1MC11_BOVIN | Bt.91072  | Uncharacterized protein            | 1.000 | 6.29                               | 3 | 3     |
|        |              |           |                                    |       | ALEEANADLEVK                       | 2 | 0.999 |
|        |              |           |                                    |       | VDELTLAR                           | 2 | 0.980 |
|        |              |           |                                    |       | VTMQLNDR                           | 2 | 0.979 |
| F1MC30 | F1MC30_BOVIN | GCNT4     | Uncharacterized protein            | 0.999 | 12.11                              | 2 | 2     |
|        |              |           |                                    |       | LVSEEEKSFFIAYSLVHKDAMVER           | 3 | 0.999 |
|        |              |           |                                    |       | NRYTHVKNEIGYEINC SGVYEGPELEIGK     | 3 | 0.868 |
| F1MC48 | F1MC48_BOVIN | Bt.97636  | Uncharacterized protein            | 0.999 | 3.81                               | 3 | 3     |
|        |              |           |                                    |       | GQNALRQILAPVVEIMDDK                | 3 | 0.999 |
|        |              |           |                                    |       | KQIPAITCISQWRGK                    | 3 | 0.999 |
|        |              |           |                                    |       | VNLLAALTNIDLALAEQGSAPALFK          | 3 | 0.999 |
| F1MC84 | F1MC84_BOVIN | LOC535409 | Uncharacterized protein (Fragment) | 0.999 | 1                                  | 2 | 2     |
|        |              |           |                                    |       | FNIDDES GVI STADILDR               | 3 | 0.999 |
|        |              |           |                                    |       | VTQVLSGFQGLDVSVNNLPLQNKR           | 3 | 0.999 |
| F1MC90 | F1MC90_BOVIN | ZFP106    | Uncharacterized protein            | 1.000 | 3.73                               | 4 | 4     |
|        |              |           |                                    |       | GSLKIEFOVQVQLEDES DGEISDTEK        | 3 | 0.999 |
|        |              |           |                                    |       | GSLKIEFOVQVQLEDES DGEISDTEKHETK    | 3 | 0.999 |
|        |              |           |                                    |       | PTMSLKQEVTPLAASLRDTER              | 3 | 0.999 |
|        |              |           |                                    |       | TLDLQSGMKEVTGNKSEMIDK              | 3 | 0.999 |
| F1MCH3 | F1MCH3_BOVIN | Bt.24813  | Uncharacterized protein            | 0.999 | 6.37                               | 2 | 2     |
|        |              |           |                                    |       | AGPPPQSSSQPIWKAIPK                 | 3 | 0.999 |
|        |              |           |                                    |       | CSRSQFEKPDFSPSSK                   | 3 | 0.999 |
| F1MCL3 | F1MCL3_BOVIN | Bt.61353  | Uncharacterized protein            | 1.000 | 2.81                               | 2 | 2     |
|        |              |           |                                    |       | NLSFSEDGYMHPKLVILLNKER             | 3 | 0.999 |
|        |              |           |                                    |       | VFASTGYGAIQKDSGWK                  | 3 | 0.848 |
| F1MCL8 | F1MCL8_BOVIN | ARHGAP31  | Uncharacterized protein (Fragment) | 1.000 | 3.77                               | 2 | 2     |
|        |              |           |                                    |       | SLTLPALSLPMLVSLLEEAQARSLATNHPAR    | 3 | 0.999 |
|        |              |           |                                    |       | TSESPLGSHSSELEKLDDEK               | 3 | 0.999 |
| F1MCM3 | F1MCM3_BOVIN | UHRF1BP1  | Uncharacterized protein (Fragment) | 0.999 | 2.17                               | 2 | 2     |
|        |              |           |                                    |       | AQASDSPAALKPPGSR                   | 3 | 0.999 |
|        |              |           |                                    |       | VVEGMFIMVNSITIK                    | 3 | 0.999 |
| F1MD25 | F1MD25_BOVIN | Bt.62085  | Uncharacterized protein            | 0.999 | 1.62                               | 2 | 2     |
|        |              |           |                                    |       | ATLGSYTYVMVKMQR                    | 3 | 0.999 |
|        |              |           |                                    |       | RSPQNVMQAQQVTK                     | 3 | 0.999 |
| F1MD40 | F1MD40_BOVIN | COL6A6    | Uncharacterized protein            | 1.000 | 4.8                                | 4 | 4     |
|        |              |           |                                    |       | IHAGTPQVLLVLDGQSQDEVAQAAEELR       | 3 | 0.999 |
|        |              |           |                                    |       | KNQGVQPIAVLVTHSPSQDNVTKAAVNLNLR    | 3 | 0.999 |
|        |              |           |                                    |       | RTTAHGRGQHTGPQK                    | 3 | 0.999 |
|        |              |           |                                    |       | TGLPGFGSEGLYEGEETGAGERGASGPVGEQGTK | 3 | 0.999 |
| F1MD64 | F1MD64_BOVIN | FAM38A    | Uncharacterized protein (Fragment) | 0.999 | 3.04                               | 3 | 3     |
|        |              |           |                                    |       | GAEEEPALPAQOEEPPGGAARPPAEDNVQAEAK  | 3 | 0.999 |
|        |              |           |                                    |       | RQLASLLEGTSDQSVVPHLFPK             | 3 | 0.999 |
|        |              |           |                                    |       | VPVLGAGAVQASAPGLSPVPRR             | 3 | 0.999 |
| F1MDB9 | F1MDB9_BOVIN | TACC2     | Uncharacterized protein (Fragment) | 0.999 | 1.94                               | 2 | 2     |
|        |              |           |                                    |       | PAGLLFQQPDLDSALQIARAEIITKER        | 3 | 0.884 |
|        |              |           |                                    |       | QASDLRGE GEGLEGGPSEIPAPIPEER       | 3 | 0.999 |
| F1MDF3 | F1MDF3_BOVIN | ALS2      | Uncharacterized protein            | 0.999 | 2.89                               | 2 | 2     |
|        |              |           |                                    |       | LNKQTDLALLGFLGVQRK                 | 3 | 0.999 |
|        |              |           |                                    |       | NLGSEVHLIEDLMDPYLQHQEGGIMFTLK      | 3 | 0.999 |
| F1MDU7 | F1MDU7_BOVIN |           | DNA topoisomerase 2                | 0.999 | 1.89                               | 2 | 2     |
|        |              |           |                                    |       | EDLAAFVEEELVEAKEK                  | 3 | 0.999 |
|        |              |           |                                    |       | GIPVVEHKVEK                        | 3 | 0.999 |
| F1ME37 | F1ME37_BOVIN | Bt.63162  | Uncharacterized protein (Fragment) | 0.999 | 10.94                              | 2 | 2     |
| F1MIP0 | F1MIP0_BOVIN | Bt.63162  | Uncharacterized protein (Fragment) | 0.999 | 8.06                               | 2 | 2     |
| F1MUL5 | F1MUL5_BOVIN | Bt.63162  | Uncharacterized protein (Fragment) | 0.999 | 8.45                               | 2 | 2     |
|        |              |           |                                    |       | LLADELSLESVLCYLEEAMK               | 3 | 0.999 |
|        |              |           |                                    |       | PLRIGYYESDGFQPSPMAR                | 3 | 0.999 |
| F1ME62 | F1ME62_BOVIN | Bt.82462  | Uncharacterized protein (Fragment) | 0.999 | 1.55                               | 3 | 3     |
|        |              |           |                                    |       | PSFLTPTDTSVATFLETAK                | 3 | 0.999 |
|        |              |           |                                    |       | QRAEPSVSAPEDLSQLPSTNAEAKAEIK       | 3 | 0.999 |
|        |              |           |                                    |       | SEGVSEHKTVLEEEK                    | 3 | 0.999 |
| F1MEQ5 | F1MEQ5_BOVIN | DARS2     | Uncharacterized protein            | 0.999 | 7.07                               | 2 | 2     |
|        |              |           |                                    |       | FIMEEQGLGLVKLLETQEEVDVLLTAGEHK     | 3 | 0.999 |
|        |              |           |                                    |       | IHNSELQHYVLDTVLK                   | 3 | 0.999 |
| F1MER4 | F1MER4_BOVIN | VIT       | Uncharacterized protein            | 0.999 | 5.67                               | 2 | 2     |
| Q95LI2 | VITRN_BOVIN  | VIT       | Vitrin                             | 0.999 | 5.67                               | 2 | 2     |
|        |              |           |                                    |       | GGAPNVAVVMVDGWPTDK                 | 3 | 0.999 |
|        |              |           |                                    |       | GVTYPSSLYSSSKSPAAK                 | 3 | 0.999 |
| F1MER7 | F1MER7_BOVIN | HSPG2     | Uncharacterized protein (Fragment) | 1.000 | 1.53                               | 3 | 3     |
|        |              |           |                                    |       | AHSVEECRCPIGYSLSCESCDAHFTR         | 3 | 0.999 |
|        |              |           |                                    |       | AQVHRGILRLPAVEASDQGGYLCR           | 3 | 0.844 |
|        |              |           |                                    |       | LRPGIVQSGGIVRIAR                   | 3 | 0.999 |
| F1MEU0 | F1MEU0_BOVIN | RP9       | Uncharacterized protein (Fragment) | 1.000 | 13.19                              | 2 | 2     |
|        |              |           |                                    |       | AASAAPRGAAMSSRAR                   | 3 | 0.999 |
|        |              |           |                                    |       | PEDCIPDVPGNEHAR                    | 3 | 0.999 |
| F1MEY0 | F1MEY0_BOVIN | Bt.105538 | Uncharacterized protein            | 0.999 | 3.6                                | 2 | 2     |
|        |              |           |                                    |       | DSTISNESSQSCSSGR                   | 3 | 0.999 |
|        |              |           |                                    |       | TAPLVLRRPRDSDMDDGQSSSEATTSR        | 3 | 0.999 |
| F1MEY1 | F1MEY1_BOVIN | Bt.105691 | Uncharacterized protein            | 0.999 | 3.48                               | 2 | 2     |
|        |              |           |                                    |       | AVMSSGHALSPIIKPLLLERSFNILAVLQK     | 3 | 0.999 |
|        |              |           |                                    |       | LEALECSTNEKLEPGDPVEVK              | 3 | 0.999 |
| F1MF78 | F1MF78_BOVIN | SYNE2     | Uncharacterized protein (Fragment) | 1.000 | 0.63                               | 2 | 2     |
|        |              |           |                                    |       | EEFNHELVVDKINQICKNLQFHNLN          | 3 | 0.999 |
|        |              |           |                                    |       | EVIIIDNLQEEVPEISK                  | 3 | 0.822 |
| F1MF87 | F1MF87_BOVIN | Bt.91527  | Uncharacterized protein (Fragment) | 1.000 | 1.53                               | 2 | 2     |
|        |              |           |                                    |       | FALIAVPSIRLSLSPQAKSHLR             | 3 | 0.999 |
|        |              |           |                                    |       | SQAASSSPVTIKPK                     | 3 | 0.999 |
| F1MFT9 | F1MFT9_BOVIN | MTMR3     | Uncharacterized protein            | 0.999 | 3.23                               | 2 | 2     |



|        |              |           |                                    |       |                                      |   |       |
|--------|--------------|-----------|------------------------------------|-------|--------------------------------------|---|-------|
|        |              |           |                                    |       | PVLAHCSGDWRTPQIVALAK                 | 3 | 0.999 |
|        |              |           |                                    |       | SPAHSALPLAECK                        | 3 | 0.999 |
| F1MFX9 | F1MFX9 BOVIN | Bt.42860  | Uncharacterized protein (Fragment) | 0.999 | 16.06                                | 2 | 2     |
|        |              |           |                                    |       | ITDTSLVFSFSAEDSESGVYMR               | 3 | 0.999 |
|        |              |           |                                    |       | LVVVNEADSVIGIISLSDILOALITPAGAK       | 3 | 0.999 |
| F1MFY5 | F1MFY5 BOVIN | LOC768315 | Uncharacterized protein            | 1.000 | 1.66                                 | 2 | 2     |
| F1MPW9 | F1MPW9 BOVIN | LOC768315 | Uncharacterized protein            | 1.000 | 1.66                                 | 2 | 2     |
|        |              |           |                                    |       | NNVMIETWNKVRSPGDDK                   | 3 | 0.999 |
|        |              |           |                                    |       | YYYYNVRDQMVAKGTLPLSR                 | 3 | 0.999 |
| P42916 | CL43 BOVIN   | CL43      | Collectin-43                       | 0.999 | 15.26                                | 2 | 2     |
| F1MFY6 | F1MFY6 BOVIN | LOC790293 | Uncharacterized protein            | 0.999 | 20                                   | 2 | 2     |
|        |              |           |                                    |       | AVLFPDGGQAVGEKIFKTAGAVK              | 3 | 0.999 |
|        |              |           |                                    |       | GERGTPGPGGAIGPQGPSGAMGPPGLK          | 3 | 0.999 |
| F1MG06 | F1MG06 BOVIN | Bt.88378  | Uncharacterized protein            | 1.000 | 2.92                                 | 2 | 2     |
|        |              |           |                                    |       | DNGHKYFLSVLADPYMPAEHR                | 3 | 0.890 |
|        |              |           |                                    |       | ILSTSSLTQSAPASPTNK                   | 3 | 0.999 |
| F1MG24 | F1MG24 BOVIN | 785381    | Uncharacterized protein            | 1.000 | 4.11                                 | 4 | 4     |
|        |              |           |                                    |       | DVESLSSCRNSSSTVSYLKK                 | 3 | 0.820 |
|        |              |           |                                    |       | ICVGIPPGECFLLGVNGAGK                 | 3 | 0.816 |
|        |              |           |                                    |       | LNAAQVLRSLDILKPVLTG                  | 3 | 0.999 |
|        |              |           |                                    |       | NSILSDIHEVHONMGYCPQFADITELTGR        | 3 | 0.999 |
| F1MG39 | F1MG39 BOVIN | SPOCD1    | Uncharacterized protein (Fragment) | 0.999 | 4.35                                 | 2 | 2     |
| F1MNK4 | F1MNK4 BOVIN | SPOCD1    | Uncharacterized protein (Fragment) | 0.999 | 5.04                                 | 2 | 2     |
|        |              |           |                                    |       | NHAFQRATSOVQVSPFDPMPQNEK             | 3 | 0.999 |
|        |              |           |                                    |       | VVHGDIPTHGLVRMSSVQLAPQELAR           | 3 | 0.907 |
| O02776 | PARG BOVIN   | PARG      | Poly(ADP-ribose) glycohydrolase    | 1.000 | 5.22                                 | 2 | 2     |
| F1MG95 | F1MG95 BOVIN | PARG      | Uncharacterized protein            | 1.000 | 5.22                                 | 2 | 2     |
|        |              |           |                                    |       | GGEIRLHFQFEGGESRAGMNDVNAK            | 3 | 0.999 |
|        |              |           |                                    |       | PGVSSENLSAVATGNWGCAGFGGDAR           | 3 | 0.999 |
| F1MGG8 | F1MGG8 BOVIN | Bt.88826  | Uncharacterized protein            | 0.999 | 3.59                                 | 2 | 2     |
|        |              |           |                                    |       | DQGAGDGHGSGGKNSGGKSGSGSK             | 3 | 0.999 |
|        |              |           |                                    |       | SSPLGQSDHSEYVPMPLPGK                 | 3 | 0.999 |
| F1MGK5 | F1MGK5 BOVIN | Bt.39123  | Uncharacterized protein            | 1.000 | 1.89                                 | 2 | 2     |
|        |              |           |                                    |       | QEEENPSTSLDSNGAALADGNIAESLESV        | 3 | 0.999 |
|        |              |           |                                    |       | SPPTNVPPQKHNDGK                      | 3 | 0.999 |
| F1MGQ6 | F1MGQ6 BOVIN | KRT6A     | Uncharacterized protein            | 1.000 | 7.18                                 | 4 | 4     |
|        |              |           |                                    |       | AQYEEIAQR                            | 2 | 0.973 |
|        |              |           |                                    |       | NKYEDEINKR                           | 3 | 1.000 |
|        |              |           |                                    |       | NLDLSIIAEVK                          | 2 | 0.999 |
|        |              |           |                                    |       | WTLLEQEGTK                           | 2 | 0.987 |
| F1MGS8 | F1MGS8 BOVIN | NAALAD2   | Uncharacterized protein            | 1.000 | 5.81                                 | 2 | 2     |
|        |              |           |                                    |       | NKYAGESFPGIFDAMFIENKADPHSAWK         | 3 | 0.999 |
|        |              |           |                                    |       | SIYNSRRKHEQACR                       | 3 | 0.902 |
| F1MGT1 | F1MGT1 BOVIN | SYNE1     | Uncharacterized protein (Fragment) | 1.000 | 0.83                                 | 4 | 4     |
|        |              |           |                                    |       | EHMTLEKGLHLTKFESDK                   | 3 | 0.999 |
|        |              |           |                                    |       | ELVKEQTSHLQORWFQLEDLVK               | 3 | 0.823 |
|        |              |           |                                    |       | NVISEKORTLYEALR                      | 3 | 0.999 |
|        |              |           |                                    |       | QWKDLQAEAPYHLLHLK                    | 3 | 0.999 |
| F1MGW0 | F1MGW0 BOVIN | Bt.23316  | Uncharacterized protein (Fragment) | 0.999 | 2.77                                 | 2 | 2     |
| P02453 | CO1A1 BOVIN  | COL1A1    | Collagen alpha-1(I) chain          | 0.999 | 2.67                                 | 2 | 2     |
|        |              |           |                                    |       | GPPGPPGKNGDDGEAGKPGR                 | 3 | 0.999 |
|        |              |           |                                    |       | RGARGEPGAPLPGPPGER                   | 3 | 0.824 |
| F1MH31 | F1MH31 BOVIN | NUP214    | Uncharacterized protein (Fragment) | 0.999 | 2.51                                 | 2 | 2     |
|        |              |           |                                    |       | QLAVGKQNGTVVQYLPQLQEK                | 3 | 0.999 |
|        |              |           |                                    |       | RQMASQAPAVSTLTESTLKNVQVNVNVELK       | 3 | 0.999 |
| F1MHS0 | F1MHS0 BOVIN | KIAA0586  | Uncharacterized protein            | 1.000 | 3.69                                 | 3 | 3     |
|        |              |           |                                    |       | LTA AAAENLFR                         | 3 | 0.999 |
|        |              |           |                                    |       | PTKVDSKLQHSITLSPGQQYLFSPSR           | 3 | 0.999 |
|        |              |           |                                    |       | TPDSSPSVSDHDVAFPMK                   | 3 | 0.999 |
| F1MHT1 | F1MHT1 BOVIN | AGL       | Uncharacterized protein            | 1.000 | 4.83                                 | 3 | 3     |
|        |              |           |                                    |       | GFNYHQPEWLWVPGYFLRAKLYFSR            | 3 | 0.999 |
|        |              |           |                                    |       | GYDELVPHQISVSEER                     | 2 | 0.978 |
|        |              |           |                                    |       | YLEARNIILAFASLRLHGLIPNLLGEGTHAR      | 3 | 0.999 |
| F1MI25 | F1MI25 BOVIN | Bt.18057  | Uncharacterized protein (Fragment) | 0.999 | 0.9                                  | 2 | 2     |
|        |              |           |                                    |       | GSIDSPKSYIFK                         | 3 | 0.806 |
|        |              |           |                                    |       | SNLSKRALGNQK                         | 3 | 0.999 |
| F1MI56 | F1MI56 BOVIN | ANKRD17   | Uncharacterized protein            | 1.000 | 1.45                                 | 2 | 2     |
|        |              |           |                                    |       | APSPAPSSVPLGSEKPSNVSQDRK             | 3 | 0.999 |
|        |              |           |                                    |       | PPLQQSQVPPPEVR                       | 3 | 0.895 |
| F1MI60 | F1MI60 BOVIN | MAP4K4    | Uncharacterized protein (Fragment) | 0.999 | 4.54                                 | 2 | 2     |
|        |              |           |                                    |       | SPVLSRRDSPLOGSGQQSQNOAGQR            | 3 | 0.999 |
|        |              |           |                                    |       | TMVHDDVESEPALTPSKEGTLIVRQSAVDQK      | 3 | 0.999 |
| F1MIE6 | F1MIE6 BOVIN | IGF2R     | Uncharacterized protein            | 0.999 | 1.52                                 | 2 | 2     |
|        |              |           |                                    |       | PWQEPGRPRAELNISFLSGGR                | 3 | 0.999 |
|        |              |           |                                    |       | SLLEFNTTVNCKQONHK                    | 3 | 0.845 |
| F1MIL0 | F1MIL0 BOVIN | Bt.18332  | Uncharacterized protein (Fragment) | 0.999 | 1.32                                 | 2 | 2     |
| F1MMT2 | F1MMT2 BOVIN | Bt.18332  | Uncharacterized protein (Fragment) | 0.999 | 0.97                                 | 2 | 2     |
|        |              |           |                                    |       | GKVSFLWDVGSVGRVEYDILTIDDSYWYR        | 3 | 0.999 |
|        |              |           |                                    |       | VSFLLWDVGSVGRVEYDILTIDDSYWYR         | 3 | 0.999 |
| F1MJ07 | F1MJ07 BOVIN | Bt.62452  | Uncharacterized protein (Fragment) | 0.999 | 3.34                                 | 3 | 3     |
| F1MJ08 | F1MJ08 BOVIN | QRICH2    | Uncharacterized protein (Fragment) | 0.999 | 4.84                                 | 3 | 3     |
|        |              |           |                                    |       | RESLDKLAPSFPIAVETFR                  | 3 | 0.999 |
|        |              |           |                                    |       | SIPDDLQEQKTLK                        | 3 | 0.999 |
|        |              |           |                                    |       | TFSGTSGIGYFDGPPSGRER                 | 3 | 0.999 |
| F1MJ19 | F1MJ19 BOVIN | PCIF1     | Uncharacterized protein            | 0.999 | 7.75                                 | 2 | 2     |
|        |              |           |                                    |       | ELCQQREGIEPPRESFNR                   | 3 | 0.999 |
|        |              |           |                                    |       | MANENHSGPREASLLSHSPGTSSQSQCPSPK      | 3 | 0.999 |
| F1MJ88 | F1MJ88 BOVIN | ZNF345    | Uncharacterized protein            | 0.999 | 3.14                                 | 2 | 2     |
|        |              |           |                                    |       | DERIHADKILLECK                       | 3 | 0.999 |
|        |              |           |                                    |       | PYECKECKGKAFSGSLIR                   | 3 | 0.999 |
| F1MJJ0 | F1MJJ0 BOVIN | DNAH9     | Uncharacterized protein            | 1.000 | 1.02                                 | 2 | 2     |
|        |              |           |                                    |       | EFYRQLVANLELTATWYNKVMK               | 3 | 0.882 |
|        |              |           |                                    |       | PGPGGLAVRLGLDAGPEAGPPRAK             | 3 | 0.999 |
| F1MJK2 | F1MJK2 BOVIN | Bt.62664  | Uncharacterized protein (Fragment) | 0.999 | 2.16                                 | 2 | 2     |
| G3MXV5 | G3MXV5 BOVIN | Bt.62664  | Uncharacterized protein (Fragment) | 0.999 | 2.24                                 | 2 | 2     |
|        |              |           |                                    |       | HLRRSLSTPNVHNVSSSR                   | 3 | 0.999 |
|        |              |           |                                    |       | RSKEGCTSENPHALTVSPFK                 | 3 | 0.999 |
| F1MJQ6 | F1MJQ6 BOVIN | COL5A3    | Uncharacterized protein (Fragment) | 0.999 | 1.94                                 | 2 | 2     |
|        |              |           |                                    |       | GSKGSPGSGQPRGDAGPPGPPGPAELHGLR       | 3 | 0.999 |
|        |              |           |                                    |       | GSPGSGQPRGDAGPPGPPGPAELHGLRR         | 3 | 0.999 |
| F1MJY3 | F1MJY3 BOVIN | TET3      | Uncharacterized protein (Fragment) | 1.000 | 3.22                                 | 2 | 2     |
|        |              |           |                                    |       | PPNCCDGPCEPDYLEWLEGGIK               | 3 | 0.806 |
|        |              |           |                                    |       | PSDPYSVNVSYSHYQAQPLAAVNGFHSK         | 3 | 0.999 |
| F1MJY9 | F1MJY9 BOVIN | COL4A6    | Uncharacterized protein (Fragment) | 0.999 | 4.74                                 | 3 | 3     |
|        |              |           |                                    |       | GEKSGPGIGAPKPGIR                     | 3 | 0.999 |
|        |              |           |                                    |       | GPPGLDGCNGTQAVGFPDPDYGSLGPPGLPGQK    | 3 | 0.999 |
|        |              |           |                                    |       | GTHGTPGSPITGVPGAPGLPGKPKGKSGPGIGAPGK | 3 | 0.999 |
| F1MK99 | F1MK99 BOVIN | UNC13A    | Uncharacterized protein (Fragment) | 0.999 | 2.83                                 | 2 | 2     |
|        |              |           |                                    |       | EDRTVGLAVLQLREKVR                    | 3 | 0.999 |

|        |              |              |                                     |       |                                      |   |       |
|--------|--------------|--------------|-------------------------------------|-------|--------------------------------------|---|-------|
| F1MKA6 | F1MKA6_BOVIN | LOC100337465 | Uncharacterized protein             | 0.999 | GSGVEDPVGEVSVHVELFTHPGTGEHKVTVK      | 3 | 0.999 |
|        |              |              |                                     |       | 3.76                                 | 2 | 2     |
|        |              |              |                                     |       | AQVCGGFILHEVWAPER                    | 3 | 0.999 |
|        |              |              |                                     |       | VGDOVQLHVDEAWRLSCMEK                 | 3 | 0.999 |
| F1MKE7 | F1MKE7_BOVIN |              | Uncharacterized protein (Fragment)  | 1.000 | 3.93                                 | 2 | 2     |
|        |              |              |                                     |       | AQYEEIAQR                            | 2 | 0.973 |
|        |              |              |                                     |       | NLDLSIAEVK                           | 2 | 0.999 |
| F1ML50 | F1ML50_BOVIN | SLC35E1      | Uncharacterized protein             | 0.999 | 7.77                                 | 2 | 2     |
|        |              |              |                                     |       | AWRVPPAPPVSGPGPHQSSGGLPPRFYPR        | 3 | 0.999 |
|        |              |              |                                     |       | VPPAPPVSGPGPHQSSGGLPPR               | 3 | 0.999 |
| F1ML89 | F1ML89_BOVIN | CPS1         | Uncharacterized protein             | 0.999 | 2.33                                 | 2 | 2     |
|        |              |              |                                     |       | LTSIDKWFLYKMR                        | 3 | 0.999 |
|        |              |              |                                     |       | QAFITAQNHGYALDSTLPAGWK               | 3 | 0.999 |
| F1MLB1 | F1MLB1_BOVIN | Bt.84314     | Uncharacterized protein             | 0.999 | 1.24                                 | 2 | 2     |
|        |              |              |                                     |       | APGAAVSAPPKQSPAQNAAPPQDSSQDK         | 3 | 0.999 |
|        |              |              |                                     |       | RLPKLQEAER                           | 3 | 0.999 |
| F1MLF8 | F1MLF8_BOVIN | HGD          | Uncharacterized protein             | 1.000 | 7.22                                 | 2 | 2     |
|        |              |              |                                     |       | TSNCLDENYYKWEPLK                     | 3 | 0.999 |
|        |              |              |                                     |       | YISGFNGECASEDR                       | 3 | 0.999 |
| F1MLJ1 | F1MLJ1_BOVIN | PCDHB1       | Uncharacterized protein             | 1.000 | 7.58                                 | 2 | 2     |
|        |              |              |                                     |       | LVYRAQVPENSANGSLVATVTDLDEGSNK        | 3 | 0.999 |
|        |              |              |                                     |       | PLDREOPEVNMITAVDGGSPKSGTAHIR         | 3 | 0.999 |
| O02811 | PI4KA_BOVIN  | PI4KA        | Phosphatidylinositol 4-kinase alpha | 0.999 | 2.1                                  | 2 | 2     |
| F1MLV0 | F1MLV0_BOVIN | PI4KA        | Uncharacterized protein             | 0.999 | 2.1                                  | 2 | 2     |
|        |              |              |                                     |       | SFPDAILFYIPOIVQALRYDKMGYVR           | 3 | 0.999 |
|        |              |              |                                     |       | YLTASQLVPPDNQDTR                     | 2 | 0.937 |
| F1MM15 | F1MM15_BOVIN | RGS3         | Uncharacterized protein (Fragment)  | 1.000 | 4.17                                 | 2 | 2     |
|        |              |              |                                     |       | DPSPGQEPLPGQELPKEDSSGQK              | 3 | 0.999 |
|        |              |              |                                     |       | TPGGEDAENGEKLTIPR                    | 3 | 0.999 |
| F1MNA8 | F1MNA8_BOVIN | ZMYM2        | Uncharacterized protein             | 0.999 | 2.18                                 | 2 | 2     |
|        |              |              |                                     |       | PHMQSKSCQTDGDWR                      | 3 | 0.858 |
|        |              |              |                                     |       | SWQPSILPDGSIFR                       | 3 | 0.999 |
| F1MNH3 | F1MNH3_BOVIN | SVEP1        | Uncharacterized protein             | 0.999 | 1.43                                 | 2 | 2     |
|        |              |              |                                     |       | KCLSNSSWSGSPSCLPCK                   | 3 | 0.999 |
|        |              |              |                                     |       | LFPEAAPGAPGRLEPPAPSEDAAAESKVER       | 3 | 0.999 |
| F1MNM6 | F1MNM6_BOVIN | TMCO7        | Uncharacterized protein             | 0.999 | 3.4                                  | 2 | 2     |
|        |              |              |                                     |       | GILEGAGAGAAGGSDAEATAADWKK            | 3 | 0.999 |
|        |              |              |                                     |       | LMRPSGVQAVVRGILEGAGAGAAGGSDAEATAADWK | 3 | 0.999 |
| F1MPT4 | F1MPT4_BOVIN | SDK2         | Uncharacterized protein (Fragment)  | 1.000 | 3.04                                 | 3 | 3     |
|        |              |              |                                     |       | NTSVWAGSSEVTMECVANARPLIK             | 3 | 0.999 |
|        |              |              |                                     |       | TTTWAEAGRTSPSLGSGCCFAGSDR            | 3 | 0.999 |
|        |              |              |                                     |       | YSRADGHGKTLSHVHDR                    | 3 | 0.828 |
| F1MPT5 | F1MPT5_BOVIN | DST          | Uncharacterized protein (Fragment)  | 1.000 | 0.61                                 | 2 | 2     |
|        |              |              |                                     |       | RRAADPSSLQSHIPVLDK                   | 3 | 0.999 |
|        |              |              |                                     |       | TIAEENLLKTOGSEKVALQLQNTIK            | 3 | 0.999 |
| F1MPX8 | F1MPX8_BOVIN | GRIP1        | Uncharacterized protein (Fragment)  | 0.999 | 7.8                                  | 3 | 3     |
| G3MZP1 | G3MZP1_BOVIN | GRIP1        | Uncharacterized protein (Fragment)  | 0.999 | 9.5                                  | 3 | 3     |
|        |              |              |                                     |       | EGNTFGFVIRGGAHDDRNK                  | 3 | 0.999 |
|        |              |              |                                     |       | PGDRLLSVDGIRLLGTTAAEMSILK            | 3 | 0.999 |
|        |              |              |                                     |       | VLAINGIPTEDSTFEANQLRDSISITSK         | 3 | 0.999 |
| F1MQI3 | F1MQI3_BOVIN | NEB          | Uncharacterized protein             | 0.999 | 1.24                                 | 4 | 4     |
|        |              |              |                                     |       | CMSYYETVLDTPEMQVR                    | 3 | 0.859 |
|        |              |              |                                     |       | ENVGKGTPTVPTQMQR                     | 3 | 0.824 |
|        |              |              |                                     |       | TTVHIMPDTPEVLLAKQINQYSEKLYK          | 3 | 0.999 |
|        |              |              |                                     |       | YRQPAVQLKFTSITDTPVILAK               | 3 | 0.999 |
| F1MRU4 | F1MRU4_BOVIN | Bt.63231     | Uncharacterized protein             | 0.999 | 2.01                                 | 4 | 4     |
|        |              |              |                                     |       | FLEDVELDDNIRIQVISMCKYFQESVK          | 3 | 0.999 |
|        |              |              |                                     |       | GHLLLVGIGSGRQASAK                    | 3 | 0.999 |
|        |              |              |                                     |       | GLAAGAWACDFEENR                      | 3 | 0.999 |
|        |              |              |                                     |       | VIQGVLLCPHTLQDVEKFR                  | 3 | 0.999 |
| F1MS10 | F1MS10_BOVIN | Bt.65326     | Uncharacterized protein (Fragment)  | 0.999 | 2.12                                 | 3 | 3     |
|        |              |              |                                     |       | LTSTQGSVLEDESILVLVSKTKK              | 3 | 0.871 |
|        |              |              |                                     |       | MGTTYGPPAGKK                         | 2 | 0.913 |
|        |              |              |                                     |       | PLLIEDVGEELDPALDNVLERNFIKTGSTFK      | 3 | 0.999 |
| F1MSF2 | F1MSF2_BOVIN | Bt.50224     | Uncharacterized protein (Fragment)  | 0.999 | 5.82                                 | 2 | 2     |
|        |              |              |                                     |       | LAGLSPLGHHSPKLDHFSNVDOYLYHMR         | 3 | 0.999 |
|        |              |              |                                     |       | VEMESQIYAIPEDIMR                     | 3 | 0.999 |
| F1MSG6 | F1MSG6_BOVIN | Bt.17143     | Uncharacterized protein             | 0.999 | 2.83                                 | 2 | 2     |
|        |              |              |                                     |       | DVSLDADSSMTAVTAEAK                   | 3 | 0.999 |
|        |              |              |                                     |       | PAAMAHAIVTSPAAGLIARK                 | 3 | 0.999 |
| F1MSH1 | F1MSH1_BOVIN | Bt.13071     | Uncharacterized protein (Fragment)  | 0.999 | 1.52                                 | 2 | 2     |
| F1N1E0 | F1N1E0_BOVIN | CACNA1A      | Uncharacterized protein             | 0.999 | 1.32                                 | 2 | 2     |
|        |              |              |                                     |       | HPFDVGLRR                            | 3 | 0.999 |
|        |              |              |                                     |       | YPGPVAEPLAGERPPTGGHGSSR              | 3 | 0.999 |
| F1MSK0 | F1MSK0_BOVIN | Bt.92800     | Uncharacterized protein             | 0.999 | 2.77                                 | 3 | 3     |
|        |              |              |                                     |       | ERKIPDEDFILIDGLNEAEFHK               | 3 | 0.999 |
|        |              |              |                                     |       | PHPPTPRLLHSQSVGLR                    | 3 | 0.999 |
|        |              |              |                                     |       | YQSSQGDIGVSQSR                       | 3 | 0.999 |
| F1MT60 | F1MT60_BOVIN | NEB          | Uncharacterized protein             | 0.999 | 1.04                                 | 2 | 2     |
|        |              |              |                                     |       | TTVHIMPDTPEVLLAKQINQYSEKLYK          | 3 | 0.999 |
|        |              |              |                                     |       | YRQPAVQLKFTSITDTPVILAK               | 3 | 0.999 |
| F1MTE8 | F1MTE8_BOVIN | Bt.63797     | Uncharacterized protein             | 0.999 | 2.22                                 | 2 | 2     |
|        |              |              |                                     |       | AKQLLQILVMDQDTKIATDYFLMEEK           | 3 | 0.999 |
|        |              |              |                                     |       | SSTPKASQRVLLDQECVFAQQSK              | 3 | 0.999 |
| Q08DG4 | FBXL8_BOVIN  | FBXL8        | F-box/LRR-repeat protein 8          | 0.999 | 10.43                                | 2 | 2     |
| F1MU23 | F1MU23_BOVIN | FBXL8        | Uncharacterized protein             | 0.999 | 10.43                                | 2 | 2     |
|        |              |              |                                     |       | DVLDAVHALCGAASALRHLDLR               | 3 | 0.999 |
|        |              |              |                                     |       | EVHCFVVRPSVLHAFR                     | 3 | 0.999 |
| F1MU48 | F1MU48_BOVIN | TOP2B        | Uncharacterized protein (Fragment)  | 0.999 | 2.13                                 | 2 | 2     |
|        |              |              |                                     |       | GIPVVEHKVEK                          | 3 | 0.999 |
|        |              |              |                                     |       | NMTCIKVSDPESNIISWNGKIPVVEHK          | 3 | 0.999 |
| F1MUF3 | F1MUF3_BOVIN | P2RX5        | Uncharacterized protein             | 0.999 | 7.72                                 | 2 | 2     |
|        |              |              |                                     |       | CYQDQDTSLQSSITKVK                    | 3 | 0.999 |
|        |              |              |                                     |       | TFLKSCKFSPEPNPCYPIFR                 | 3 | 0.999 |
| F1MUK2 | F1MUK2_BOVIN | MED24        | Uncharacterized protein             | 0.999 | 5.46                                 | 2 | 2     |
|        |              |              |                                     |       | EGLEAGTPAAGEKQAMCQRLEK               | 3 | 0.999 |
|        |              |              |                                     |       | ILNPDHPCFRPDSTKVESLVALLNNSSEIK       | 3 | 0.999 |
| F1MUY2 | F1MUY2_BOVIN | KRT6C        | Uncharacterized protein             | 1.000 | 5.43                                 | 3 | 3     |
|        |              |              |                                     |       | AQYEEIAQR                            | 2 | 0.973 |
|        |              |              |                                     |       | NKYEDEINKR                           | 3 | 1.000 |
|        |              |              |                                     |       | NLDLSIAEVK                           | 2 | 0.999 |
| F1MVG5 | F1MVG5_BOVIN | Bt.106492    | Uncharacterized protein             | 0.999 | 7.74                                 | 2 | 2     |
|        |              |              |                                     |       | CPECRGIAETPDFK                       | 3 | 0.999 |
|        |              |              |                                     |       | PEHTAHSHPHRAAESREK                   | 3 | 0.999 |
| F1MVT7 | F1MVT7_BOVIN | Bt.35384     | Uncharacterized protein             | 1.000 | 9.7                                  | 2 | 2     |
|        |              |              |                                     |       | DLGQFYAGLPAESYPIIKGVACKVASLFDSSK     | 3 | 0.999 |
|        |              |              |                                     |       | EWLCDGFLVDIMDHLREISELLRVSK           | 3 | 0.999 |
| F1MW73 | F1MW73_BOVIN | MGC148692    | Uncharacterized protein             | 0.999 | 3.42                                 | 2 | 2     |
|        |              |              |                                     |       | PAGQTPPPSPLSKVSRPYVELLTR             | 3 | 0.999 |

|        |              |          |                                                  |       |                                     |   |       |
|--------|--------------|----------|--------------------------------------------------|-------|-------------------------------------|---|-------|
| F1MX14 | F1MX14_BOVIN | MDGA2    | Uncharacterized protein (Fragment)               | 1.000 | PAWQKFSDDGGEGESIR                   | 3 | 0.999 |
|        |              |          |                                                  |       | 5.58                                | 2 | 2     |
|        |              |          |                                                  |       | GPGEIDIAIDVSVIAEGEACAKDQLTTK        | 3 | 0.999 |
|        |              |          |                                                  |       | SIRVDVYYLDDPVVTVHQSIGEAK            | 3 | 0.999 |
| F1MX58 | F1MX58_BOVIN | Bt.74139 | Uncharacterized protein                          | 0.999 | 3.39                                | 3 | 3     |
|        |              |          |                                                  |       | ANSLGDLIAQKNSGVTANGGPR              | 3 | 0.999 |
|        |              |          |                                                  |       | KKTILDQIFVWEQNLQEQFMDLFR            | 3 | 0.999 |
|        |              |          |                                                  |       | NSGVTANGGPRSKLAGYCR                 | 3 | 0.999 |
| F1MX80 | F1MX80_BOVIN | METTL3   | Uncharacterized protein                          | 0.999 | 15.86                               | 3 | 3     |
|        |              |          |                                                  |       | RAEQDSTTAAFTSSLASGLASSASEVAK        | 3 | 0.999 |
|        |              |          |                                                  |       | SDSPVPAAPTSGGPKPTASAVPELATDPELEK    | 3 | 0.999 |
|        |              |          |                                                  |       | SLLQDDAHPPTLVTYADHSKLSAMMGAVAOK     | 3 | 0.999 |
| F1MX93 | F1MX93_BOVIN | MYO5C    | Uncharacterized protein                          | 0.999 | 2.6                                 | 3 | 3     |
|        |              |          |                                                  |       | IQKLESELDRAAHR                      | 3 | 0.999 |
|        |              |          |                                                  |       | REDEAKLIQNLILDK                     | 3 | 0.999 |
|        |              |          |                                                  |       | VLENHFQSQKDCYEK                     | 3 | 0.999 |
| F1MXJ2 | F1MXJ2_BOVIN | Bt.37052 | Uncharacterized protein (Fragment)               | 0.999 | 1.45                                | 2 | 2     |
|        |              |          |                                                  |       | MSWLRDGRPLGLDAHLSSSQGMVLQLIK        | 3 | 0.999 |
|        |              |          |                                                  |       | SDGSLHIERVRLQDGGEYTCVASNAGITNK      | 3 | 0.830 |
| Q8HXQ5 | MRP1_BOVIN   | ABCC1    | Multidrug resistance-associated protein 1        | 1.000 | 3.2                                 | 2 | 2     |
| F1MY01 | F1MY01_BOVIN | ABCC1    | Uncharacterized protein (Fragment)               | 1.000 | 3.24                                | 2 | 2     |
| F1MXK7 | F1MXK7_BOVIN | Bt.88646 | Uncharacterized protein (Fragment)               | 1.000 | 3.2                                 | 2 | 2     |
|        |              |          |                                                  |       | LECVGNCIVLFAVLSR                    | 3 | 0.999 |
|        |              |          |                                                  |       | VSLRAVYCDSDVYLLDDPLSAVDAHVGK        | 3 | 0.999 |
| P04258 | CO3A1_BOVIN  | COL3A1   | Collagen alpha-1(III) chain                      | 1.000 | 5.53                                | 2 | 2     |
| F1N2Y4 | F1N2Y4_BOVIN | COL3A1   | Uncharacterized protein (Fragment)               | 1.000 | 5.54                                | 2 | 2     |
| F1MXS8 | F1MXS8_BOVIN | COL3A1   | Uncharacterized protein                          | 1.000 | 3.96                                | 2 | 2     |
|        |              |          |                                                  |       | DGPRGPTGPIGPPGAPGQPKGEGSAGPVPIAGPR  | 3 | 0.999 |
|        |              |          |                                                  |       | GFPGPPGMKGPAGMPGFPGMK               | 3 | 0.999 |
| F1MXV4 | F1MXV4_BOVIN | Bt.77614 | Uncharacterized protein                          | 0.999 | 2.93                                | 2 | 2     |
|        |              |          |                                                  |       | NSPSSLSSSSETGSGGGTYRQK              | 3 | 0.831 |
|        |              |          |                                                  |       | SNSDITISELDVDSFDECISPTYKTGPSLHR     | 3 | 0.999 |
| F1MYB0 | F1MYB0_BOVIN | STOX2    | Uncharacterized protein (Fragment)               | 0.999 | 5.87                                | 2 | 2     |
|        |              |          |                                                  |       | GPGGPVAPGTVVEGLANGLRQHHGAEPSLTK     | 3 | 0.999 |
|        |              |          |                                                  |       | RTEMPFPEPSRGSSESK                   | 3 | 0.999 |
| F1MYC9 | F1MYC9_BOVIN | SPTBN1   | Uncharacterized protein                          | 1.000 | 2.84                                | 3 | 3     |
|        |              |          |                                                  |       | HALVEADIGIAQERVRGNVNSAQK            | 3 | 0.999 |
|        |              |          |                                                  |       | HQLEQAVEDYAETVHLSKTSR               | 3 | 0.882 |
|        |              |          |                                                  |       | LVSQDNFGFDLPAVEAATKK                | 3 | 0.999 |
| F1MYE0 | F1MYE0_BOVIN | IRS1     | Uncharacterized protein                          | 0.999 | 3.72                                | 2 | 2     |
|        |              |          |                                                  |       | CPSQLQAPREEDTGAEEYMNMDLGPGR         | 3 | 0.999 |
|        |              |          |                                                  |       | SSAPKRSIPLESCEFNINK                 | 3 | 0.999 |
| F1MYJ6 | F1MYJ6_BOVIN | Bt.31718 | Uncharacterized protein (Fragment)               | 0.999 | 3.14                                | 2 | 2     |
|        |              |          |                                                  |       | DVILTLEKLSIKGIEHFSMLLEQR            | 3 | 0.999 |
|        |              |          |                                                  |       | RDPVLGFGFVAGSEK                     | 3 | 0.999 |
| F1MYN2 | F1MYN2_BOVIN | CGN      | Uncharacterized protein                          | 0.999 | 4.19                                | 2 | 2     |
|        |              |          |                                                  |       | ASTYGVAVRVQGIAGQPFVVLNSGEK          | 3 | 0.999 |
|        |              |          |                                                  |       | QDCEEASKAQMMAETEAAVLGQRR            | 3 | 0.873 |
| F1MYQ7 | F1MYQ7_BOVIN | FRY      | Uncharacterized protein (Fragment)               | 0.999 | 1.39                                | 2 | 2     |
|        |              |          |                                                  |       | NEVNVPCLRNFVESLYDITLLESSR           | 3 | 0.999 |
|        |              |          |                                                  |       | TLDHFDISETPIIGR                     | 3 | 0.999 |
| F1MYW0 | F1MYW0_BOVIN | NT5DC3   | Uncharacterized protein                          | 0.999 | 6.24                                | 2 | 2     |
|        |              |          |                                                  |       | MATAAVTAAARGAGAR                    | 3 | 0.999 |
|        |              |          |                                                  |       | YEYDPNFAIRGLHYDVQR                  | 3 | 0.999 |
| F1MYW2 | F1MYW2_BOVIN | Bt.32395 | Uncharacterized protein                          | 0.999 | 1.97                                | 2 | 2     |
|        |              |          |                                                  |       | LGQGRNARSGR                         | 3 | 0.999 |
|        |              |          |                                                  |       | TDSFFLEPLMPAVLRPAEK                 | 3 | 0.999 |
| F1MZA7 | F1MZA7_BOVIN | Bt.9590  | Uncharacterized protein                          | 0.999 | 3.79                                | 3 | 3     |
|        |              |          |                                                  |       | EAPDDFLPIVHYVYLGQRTQGCFTIR          | 3 | 0.999 |
|        |              |          |                                                  |       | MARACLNLMAMVTQGPAAARDVCSHFDLNK      | 3 | 0.999 |
|        |              |          |                                                  |       | MVLDTAEDLGGGNEEAIVLRCRDIAATVPDI     | 3 | 0.999 |
| F1N061 | F1N061_BOVIN | KIF7     | Uncharacterized protein                          | 1.000 | 3.33                                | 2 | 2     |
|        |              |          |                                                  |       | HTGATHLNRSSRSHTIFTVLEQR             | 3 | 0.999 |
|        |              |          |                                                  |       | LEENRDFLALEDAMEQYK                  | 3 | 0.999 |
| F1N0A6 | F1N0A6_BOVIN | Bt.63011 | Uncharacterized protein (Fragment)               | 0.999 | 0.93                                | 2 | 2     |
|        |              |          |                                                  |       | SFIISARDNNEEGEELFIK                 | 3 | 0.999 |
|        |              |          |                                                  |       | VAVLTILDSEPEDDEIIVSLVYTEGGSR        | 3 | 0.999 |
| G3MYZ7 | G3MYZ7_BOVIN | USP34    | Ubiquitin carboxyl-terminal hydrolase (Fragment) | 0.999 | 1.07                                | 2 | 2     |
| F1N0A8 | F1N0A8_BOVIN | USP34    | Uncharacterized protein (Fragment)               | 0.999 | 1.07                                | 2 | 2     |
|        |              |          |                                                  |       | FMDFSFEKTHSAYMLFYKR                 | 3 | 0.999 |
|        |              |          |                                                  |       | PPRPELNMCLLPTMVTSK                  | 3 | 0.999 |
| F1N0D4 | F1N0D4_BOVIN | Bt.51583 | Protein phosphatase methyltransferase 1          | 0.999 | 13.99                               | 2 | 2     |
| Q58DN4 | PPME1_BOVIN  | PPME1    | Protein phosphatase methyltransferase 1          | 0.999 | 14.21                               | 2 | 2     |
|        |              |          |                                                  |       | VYKSGSEGPVLLLLHGGGHSALSWAVFTAIIISR  | 3 | 0.999 |
|        |              |          |                                                  |       | YWDGWFRLGSLNLFSLCPIPK               | 3 | 0.999 |
| F1N0J3 | F1N0J3_BOVIN | Bt.73262 | Uncharacterized protein (Fragment)               | 0.974 | 4.41                                | 2 | 2     |
|        |              |          |                                                  |       | EHPITLAIGDGANDVSMILEAHVIGVIGK       | 3 | 0.852 |
|        |              |          |                                                  |       | SATGEIYLFCKGADSSIFPR                | 3 | 0.825 |
| Q28083 | COBA1_BOVIN  | COL11A1  | Collagen alpha-1(XI) chain (Fragment)            | 0.999 | 6.59                                | 2 | 2     |
| F1N0K0 | F1N0K0_BOVIN | COL11A1  | Uncharacterized protein                          | 0.999 | 3.3                                 | 2 | 2     |
|        |              |          |                                                  |       | GHPGPPGPPGEOQLPGAAGKEGAKGDPGPOGVSGK | 3 | 0.999 |
|        |              |          |                                                  |       | PGLAGLPADGPPGHPGKEGQSGEK            | 3 | 0.999 |
| F1N0Q7 | F1N0Q7_BOVIN | FDPS     | Uncharacterized protein                          | 0.999 | 4.83                                | 2 | 2     |
|        |              |          |                                                  |       | ILLEMGEFFQIQENYGOKEAEK              | 3 | 0.999 |
|        |              |          |                                                  |       | VLTEEDIGHPEIGDAITRLK                | 3 | 0.999 |
| F1N0S1 | F1N0S1_BOVIN | ASAP3    | Uncharacterized protein                          | 1.000 | 4.31                                | 2 | 2     |
|        |              |          |                                                  |       | CGVYKGLTISHSTINR                    | 3 | 0.852 |
|        |              |          |                                                  |       | SARQPVPGRNVMVGFPEGDGSR              | 3 | 0.999 |
| F1N0V8 | F1N0V8_BOVIN | GLT25D2  | Uncharacterized protein                          | 1.000 | 6.23                                | 2 | 2     |
|        |              |          |                                                  |       | IHRNAKNTAELPPASLDTAPSR              | 3 | 0.999 |
|        |              |          |                                                  |       | IVEAVDGKALNTSQLK                    | 3 | 0.999 |
| F1N121 | F1N121_BOVIN | Bt.62297 | Uncharacterized protein                          | 0.999 | 8.6                                 | 2 | 2     |
|        |              |          |                                                  |       | DTPNPPGIFSLRHAKESLVGATALSDR         | 3 | 0.999 |
|        |              |          |                                                  |       | HFDTIQICLSLSEVLGSPAGGQWHIHTFQGR     | 3 | 0.999 |
| F1N1K6 | F1N1K6_BOVIN | 617212   | Uncharacterized protein (Fragment)               | 1.000 | 0.99                                | 2 | 2     |
|        |              |          |                                                  |       | ELAASVFYGGPVDKDKDR                  | 3 | 0.999 |
|        |              |          |                                                  |       | LKGHSSTVLGDTLLCSAAINLGPFPVVR        | 3 | 0.999 |
| F1N1N9 | F1N1N9_BOVIN | HERC5    | Uncharacterized protein                          | 0.999 | 4.8                                 | 2 | 2     |
|        |              |          |                                                  |       | KSYFFGLLCLSLFNVCNVADIPFLALFK        | 3 | 0.999 |
|        |              |          |                                                  |       | PVPGRVSESRPPASR                     | 3 | 0.999 |
| F1N1R6 | F1N1R6_BOVIN | PDGFR1   | Uncharacterized protein                          | 0.999 | 9.87                                | 2 | 2     |
|        |              |          |                                                  |       | DRDSADPTPKTPTSIMTQMDK               | 3 | 0.999 |
|        |              |          |                                                  |       | RDEAKTGSTYIFFTEK                    | 3 | 0.999 |
| Q2KHZ2 | HBS1L_BOVIN  | HBS1L    | HBS1-like protein                                | 0.961 | 4.52                                | 2 | 2     |
| F1N1V0 | F1N1V0_BOVIN | HBS1L    | Uncharacterized protein                          | 0.961 | 4.52                                | 2 | 2     |
|        |              |          |                                                  |       | FDVQKALSVLEQDK                      | 3 | 0.805 |
|        |              |          |                                                  |       | YSGSTIAAGVVTIHKD                    | 3 | 0.801 |
| F1N2D3 | F1N2D3_BOVIN | ZO1      | Uncharacterized protein (Fragment)               | 1.000 | 2.28                                | 2 | 2     |
|        |              |          |                                                  |       | AEQLASVQYTLPKTAGGDRADFWR            | 3 | 0.999 |

|        |              |           |                                                              |       |                                 |    |       |
|--------|--------------|-----------|--------------------------------------------------------------|-------|---------------------------------|----|-------|
| F1N300 | F1N300_BOVIN | Bt.76801  | Condensin complex subunit 1 (Fragment)                       | 1.000 | PVTFIGPIADVAREK                 | 3  | 0.999 |
| F1N3G4 | F1N3G4_BOVIN | NCAPD2    | Condensin complex subunit 1                                  | 1.000 | 1.83                            | 2  | 2     |
|        |              |           |                                                              |       | 1.72                            | 2  | 2     |
|        |              |           |                                                              |       | GOVSEMAVLLIDPAPQIAALAK          | 3  | 0.999 |
|        |              |           |                                                              |       | VKGQVSEMAVLLIDPAPQIAALAK        | 3  | 0.999 |
| F1N329 | F1N329_BOVIN | Bt.56498  | Uncharacterized protein                                      | 1.000 | 3.91                            | 2  | 2     |
|        |              |           |                                                              |       | PFLLNRTHEFHIFEFISFAR            | 3  | 0.999 |
|        |              |           |                                                              |       | RELATSAPVVRPAPASSEIMASAAK       | 3  | 0.999 |
| F1N3L2 | F1N3L2_BOVIN | ABCG5     | Uncharacterized protein                                      | 0.999 | 4.16                            | 2  | 2     |
|        |              |           |                                                              |       | TGTLLEGEVFNQQLHR                | 3  | 0.999 |
|        |              |           |                                                              |       | TLLDAMSGR                       | 3  | 0.999 |
| Q0VCA3 | LETM1_BOVIN  | LETM1     | LETM1 and EF-hand domain-containing protein 1, mitochondrial | 1.000 | 8.06                            | 2  | 2     |
| F1N3R4 | F1N3R4_BOVIN | LETM1     | Uncharacterized protein                                      | 1.000 | 8.06                            | 2  | 2     |
|        |              |           |                                                              |       | VAEVEGEQVDNKAKLEATLQEEAAIQQEHR  | 3  | 0.999 |
|        |              |           |                                                              |       | VIELVDKEDVHISTSQVAEIVATLEKEEK   | 3  | 0.999 |
| F1N415 | F1N415_BOVIN | PCLO      | Uncharacterized protein                                      | 0.976 | 0.62                            | 2  | 2     |
|        |              |           |                                                              |       | DDMTSTVDFDR                     | 3  | 0.805 |
|        |              |           |                                                              |       | TIPQPGPAKPLAQQLGTAK             | 3  | 0.803 |
| F1N439 | F1N439_BOVIN | STXBP5L   | Uncharacterized protein                                      | 0.999 | 2.19                            | 2  | 2     |
|        |              |           |                                                              |       | HEITTEIVSLEVR                   | 3  | 0.999 |
|        |              |           |                                                              |       | TVLLSMGTIDLYR                   | 3  | 0.999 |
| F1N482 | F1N482_BOVIN | RGNEF     | Uncharacterized protein (Fragment)                           | 0.999 | 3.67                            | 2  | 2     |
|        |              |           |                                                              |       | GMFLISSAGPEMVEIHTNSKEER         | 3  | 0.999 |
|        |              |           |                                                              |       | LVLQQRSLAPGPAFRGSPFQDQEK        | 3  | 0.999 |
| F1N4I1 | F1N4I1_BOVIN | Bt.45632  | Uncharacterized protein (Fragment)                           | 0.999 | 1.83                            | 2  | 2     |
|        |              |           |                                                              |       | IPDAFLFRSPWAIPKIEQLPMPAATFIR    | 3  | 0.999 |
|        |              |           |                                                              |       | YIFTANKCK                       | 1  | 0.999 |
| Q0IH7  | ST14_BOVIN   | ST14      | Suppressor of tumorigenicity 14 protein homolog              | 0.999 | 4.21                            | 2  | 2     |
| F1N4X7 | F1N4X7_BOVIN | ST14      | Uncharacterized protein                                      | 0.999 | 4.23                            | 2  | 2     |
|        |              |           |                                                              |       | FKAFFLQEPNVPVGSCTK              | 3  | 0.999 |
|        |              |           |                                                              |       | RGAGGSGDLGAGFKYTSR              | 3  | 0.999 |
| F1N510 | F1N510_BOVIN | CBLB      | Uncharacterized protein                                      | 1.000 | 5.7                             | 3  | 3     |
|        |              |           |                                                              |       | ASQDYDPLPSSSDGQAPARPPK          | 3  | 0.999 |
|        |              |           |                                                              |       | LAQLSENEYFKYIDSLMK              | 3  | 0.999 |
|        |              |           |                                                              |       | RALEIAQNNVEVAR                  | 3  | 0.832 |
| F1N5I4 | F1N5I4_BOVIN | ADAM11    | Uncharacterized protein (Fragment)                           | 0.999 | 6.41                            | 2  | 2     |
|        |              |           |                                                              |       | GPSGTNIIIGSIAGAVLVAAILGGTGWGFK  | 3  | 0.999 |
|        |              |           |                                                              |       | LGDLGGDISSVTFYHQGK              | 3  | 0.809 |
| F1N5M2 | F1N5M2_BOVIN | Bt.53584  | Uncharacterized protein                                      | 0.999 | 8.86                            | 2  | 2     |
| Q3MHN5 | VTDB_BOVIN   | GC        | Vitamin D-binding protein                                    | 0.999 | 8.86                            | 2  | 2     |
|        |              |           |                                                              |       | ILESTLKSDECHSESSSTAACLNAKGPQLTR | 3  | 0.999 |
|        |              |           |                                                              |       | VLDQYIFELSR                     | 2  | 0.995 |
| F1N5T2 | F1N5T2_BOVIN |           | Uncharacterized protein (Fragment)                           | 0.999 | 9.3                             | 2  | 2     |
|        |              |           |                                                              |       | AEVAQREAEITLREQLSSANHSLOASQIQK  | 3  | 0.999 |
|        |              |           |                                                              |       | LEQDLSTIQSIQRPDAAEAGAELEK       | 3  | 0.999 |
| F1N643 | F1N643_BOVIN | SHROOM3   | Uncharacterized protein (Fragment)                           | 1.000 | 1.81                            | 2  | 2     |
|        |              |           |                                                              |       | RLLTLEGHSPHPSER                 | 3  | 0.999 |
|        |              |           |                                                              |       | TTMDLMEGLFPRDVLNLLK             | 3  | 0.999 |
| P31407 | VATB1_BOVIN  | ATP6V1B1  | V-type proton ATPase subunit B, kidney isoform               | 0.999 | 9.75                            | 2  | 2     |
| F1N688 | F1N688_BOVIN | Bt.4211   | Uncharacterized protein                                      | 0.999 | 9.75                            | 2  | 2     |
|        |              |           |                                                              |       | GLPGGGASLGAAREHVQAVTRNRYTHPR    | 3  | 0.999 |
|        |              |           |                                                              |       | IYPEEMIEGTGSPIDVMNSIAR          | 3  | 0.999 |
| F1N693 | F1N693_BOVIN | Bt.8487   | Uncharacterized protein (Fragment)                           | 0.999 | 3.97                            | 2  | 2     |
|        |              |           |                                                              |       | AEVAQREAEITLREQLSSANHSLOASQIQK  | 3  | 0.999 |
|        |              |           |                                                              |       | EEAPRPAEKAEPSPGTPVDAADDEGR      | 3  | 0.999 |
| F1N6H4 | F1N6H4_BOVIN | MACF1     | Uncharacterized protein (Fragment)                           | 1.000 | 1.13                            | 4  | 4     |
|        |              |           |                                                              |       | EGLDKLVSDANEQYKLVSDTVGOR        | 3  | 0.850 |
|        |              |           |                                                              |       | EGRLTNKATLSSEMMNGIDPESYR        | 3  | 0.855 |
|        |              |           |                                                              |       | FEQLCQQQEKESLKK                 | 3  | 0.818 |
|        |              |           |                                                              |       | NLLSVESLKEEWQLR                 | 3  | 0.809 |
| F1N6Y5 | F1N6Y5_BOVIN | SETD1B    | Uncharacterized protein                                      | 0.999 | 2.14                            | 2  | 2     |
|        |              |           |                                                              |       | MENSHPPHHHQPPQPGPSGERR          | 3  | 0.999 |
|        |              |           |                                                              |       | VDHDTIIDATKGNFAR                | 3  | 0.999 |
| Q3ZBU3 | CP059_BOVIN  |           | Uncharacterized protein C16orf59 homolog                     | 0.999 | 9.71                            | 2  | 2     |
| F1N6Y6 | F1N6Y6_BOVIN | Bt.49344  | Uncharacterized protein                                      | 0.999 | 9.71                            | 2  | 2     |
|        |              |           |                                                              |       | LPMCASSLWAQLSSMOTR              | 3  | 0.999 |
|        |              |           |                                                              |       | PEAGLRDQVQQAASQVPEAFTLK         | 3  | 0.999 |
| F1N724 | F1N724_BOVIN | Bt.105725 | Uncharacterized protein                                      | 0.999 | 0.57                            | 2  | 2     |
|        |              |           |                                                              |       | ELMERTAKIK                      | 3  | 0.863 |
|        |              |           |                                                              |       | RFKASSITEIWSLEK                 | 3  | 0.999 |
| F1N757 | F1N757_BOVIN | TTN       | Uncharacterized protein                                      | 1.000 | 2.15                            | 37 | 37    |
|        |              |           |                                                              |       | AENEVIGIGEPSLPSRPVAK            | 3  | 0.897 |
|        |              |           |                                                              |       | DEADVLEDDRTHIKITPTTLALEK        | 3  | 1.000 |
|        |              |           |                                                              |       | DPIYPPDPPIKIKGLVTK              | 3  | 1.000 |
|        |              |           |                                                              |       | EQLLPPKILMPEQITIK               | 3  | 0.824 |
|        |              |           |                                                              |       | EVSRDSVTITWEVPTIDGGAPVNNYIEK    | 3  | 1.000 |
|        |              |           |                                                              |       | FGGPPVEIGPILAVDPLGPTSPER        | 3  | 1.000 |
|        |              |           |                                                              |       | FVSMDDGKTHSITFRNLSIDDTSIQK      | 3  | 0.999 |
|        |              |           |                                                              |       | IGVGKPSAATPFK                   | 3  | 0.829 |
|        |              |           |                                                              |       | IKAANIVGEGEPRELAESVIAK          | 3  | 1.000 |
|        |              |           |                                                              |       | IREYTLTHLPQGAEYFR               | 3  | 0.868 |
|        |              |           |                                                              |       | ITNLQEGAIYFR                    | 3  | 0.821 |
|        |              |           |                                                              |       | KPNQKGSIVASDVTK                 | 3  | 0.861 |
|        |              |           |                                                              |       | LEMREVTMDDISQIKAQVK             | 3  | 0.933 |
|        |              |           |                                                              |       | LLAGITVKGTKIELPATVTGK           | 3  | 1.000 |
|        |              |           |                                                              |       | LTVLEGDPIYFTGK                  | 3  | 0.889 |
|        |              |           |                                                              |       | LVCEVSKPGAETVYKGDDEIETGR        | 3  | 0.833 |
|        |              |           |                                                              |       | LVIKAGDNIK                      | 3  | 0.826 |
|        |              |           |                                                              |       | MAHEGALTGVTTDQKEKQK             | 3  | 0.882 |
|        |              |           |                                                              |       | MGQKYSFRVAANVVK                 | 3  | 0.840 |
|        |              |           |                                                              |       | NPFVVPDAPKAPEITAVTK             | 3  | 0.921 |
|        |              |           |                                                              |       | NRSSVTLYVNAPEPPQILQELQIPITVQSGK | 3  | 1.000 |
|        |              |           |                                                              |       | NSITLAWGKPIYDGGSEILGYVVEICK     | 3  | 0.932 |
|        |              |           |                                                              |       | RCNEHLVPLVITYAKGLEEGK           | 3  | 0.930 |
|        |              |           |                                                              |       | SEKDEKFEELVSFIQOR               | 3  | 1.000 |
|        |              |           |                                                              |       | SPLLVRKAQPTMPPEVPEVPPVVK        | 3  | 0.916 |
|        |              |           |                                                              |       | SVRADAGIYTVLENKLGATASINVK       | 3  | 1.000 |
|        |              |           |                                                              |       | TEEVVKEDLOKPLDLK                | 3  | 1.000 |
|        |              |           |                                                              |       | TSVSLAWSVPEDEGGSKVTGYLIEMQK     | 3  | 0.934 |
|        |              |           |                                                              |       | VAARNVAVGSLPR                   | 3  | 0.884 |
|        |              |           |                                                              |       | VDGLLEGLTYVFRVCAENAAGPGK        | 3  | 0.908 |
|        |              |           |                                                              |       | VDKGDGQYTCYAVNEVGK              | 3  | 0.885 |
|        |              |           |                                                              |       | VRAENRFVGVGAPAEITQR             | 3  | 0.853 |
|        |              |           |                                                              |       | VTSNDLMSRKYTVK                  | 3  | 0.891 |
|        |              |           |                                                              |       | WKGEDDVTSSHLAVHK                | 3  | 0.881 |
|        |              |           |                                                              |       | YGVGEPLSESEPTAKNPFVVPDAPK       | 3  | 0.834 |
|        |              |           |                                                              |       | YSIQNTDSSSILIPQVTRHDTGK         | 3  | 1.000 |
|        |              |           |                                                              |       | YVITATNSCGSK                    | 3  | 0.813 |

|        |              |           |                                    |       |                                   |   |       |
|--------|--------------|-----------|------------------------------------|-------|-----------------------------------|---|-------|
| F1N773 | F1N773 BOVIN | CNKS2     | Uncharacterized protein (Fragment) | 0.999 | 4.63                              | 2 | 2     |
|        |              |           |                                    |       | NLVNAREDPSPGVILTKK                | 3 | 0.999 |
|        |              |           |                                    |       | PLALQPLIPRSPSSVATPSSITSTPTR       | 3 | 0.999 |
| F1N7B8 | F1N7B8 BOVIN | EML5      | Uncharacterized protein            | 0.999 | 2.53                              | 2 | 2     |
|        |              |           |                                    |       | TVKAHDGPFVSMHALEKGFVTGGK          | 3 | 0.999 |
|        |              |           |                                    |       | YLAVASHDSFDIYINVMSSKRVGICK        | 3 | 0.999 |
| F1N7E7 | F1N7E7 BOVIN | Bt.30463  | Uncharacterized protein (Fragment) | 0.999 | 5.48                              | 2 | 2     |
|        |              |           |                                    |       | EDAKVLCMCGHFSFLODLSVHMIK          | 3 | 0.999 |
|        |              |           |                                    |       | ENALSDISDMLKNLTESHTKSSSTPSSISEK   | 3 | 0.999 |
| F1N7G8 | F1N7G8 BOVIN | PDS5B     | Uncharacterized protein            | 0.999 | 2.28                              | 2 | 2     |
|        |              |           |                                    |       | AIFSKVMVITRNLPDPGK                | 3 | 0.999 |
|        |              |           |                                    |       | EDILENEDEQNSPPK                   | 3 | 0.999 |
| F1N7N4 | F1N7N4 BOVIN | Bt.62495  | Uncharacterized protein (Fragment) | 0.999 | 4.76                              | 3 | 3     |
|        |              |           |                                    |       | DLRVPVNASFCSPDAR                  | 3 | 0.831 |
|        |              |           |                                    |       | PLPSHLAGSPSDSTGGRPPSHLYKR         | 3 | 0.999 |
|        |              |           |                                    |       | VPVNASFCSPDARVPTGVVPCCK           | 3 | 0.903 |
| F1N7Q1 | F1N7Q1 BOVIN | Bt.21054  | Uncharacterized protein            | 1.000 | 6.34                              | 2 | 2     |
|        |              |           |                                    |       | EAEDVPGPAAAPLPPGGPSLPPGQK         | 3 | 0.999 |
|        |              |           |                                    |       | FHPDQLQVLLVFTKEDNQCNGFCRACEK      | 3 | 0.999 |
| F6QK33 | F6QK33 BOVIN | Bt.11917  | Uncharacterized protein            | 0.999 | 7.12                              | 2 | 2     |
|        |              |           |                                    |       | EESPSNLATLCYKAVEKLVQGAESGCHSEK    | 3 | 0.999 |
|        |              |           |                                    |       | VGLMHIGVFILLLLSGERNFGVRLNK        | 3 | 0.999 |
| F6QQ19 | F6QQ19 BOVIN | Bt.105989 | Uncharacterized protein            | 0.999 | 7.74                              | 2 | 2     |
|        |              |           |                                    |       | MDFSFSFMOGMINTIQPPQLIDSANIR       | 3 | 0.812 |
|        |              |           |                                    |       | PSPPPPPPPPPSPVQTVIPKK             | 3 | 0.999 |
| F6QVR0 | F6QVR0 BOVIN | Bt.9097   | Uncharacterized protein            | 0.999 | 5.57                              | 2 | 2     |
|        |              |           |                                    |       | AHGDGTPHPDPPCAR                   | 3 | 0.999 |
|        |              |           |                                    |       | MAEFLPLLPCTPLLTQDVCAGDSRVPPAK     | 3 | 0.999 |
| F6RF21 | F6RF21 BOVIN | Bt.3161   | Uncharacterized protein            | 0.999 | 1.4                               | 2 | 2     |
|        |              |           |                                    |       | EAIYSGFIR                         | 3 | 0.999 |
|        |              |           |                                    |       | LANSGNRPPANAEIFSCNK               | 3 | 0.999 |
| P02081 | HBBF BOVIN   |           | Hemoglobin fetal subunit beta      | 1.000 | 62.76                             | 8 | 8     |
| F6RFA2 | F6RFA2 BOVIN | Bt.102944 | Uncharacterized protein (Fragment) | 1.000 | 56.17                             | 8 | 8     |
|        |              |           |                                    |       | AAVTSLFAK                         | 2 | 0.997 |
|        |              |           |                                    |       | FFESFGDLSSADAILGNPK               | 2 | 1.000 |
|        |              |           |                                    |       | FGSEFSPQLQASFOK                   | 2 | 0.959 |
|        |              |           |                                    |       | LLGNVLVVLAR                       | 2 | 1.000 |
|        |              |           |                                    |       | LLVYYPWTQR                        | 2 | 0.980 |
|        |              |           |                                    |       | RFGSEFSPQLQASFOK                  | 3 | 1.000 |
|        |              |           |                                    |       | VKVDEVGSEALGR                     | 3 | 1.000 |
|        |              |           |                                    |       | VVTGVANALAH                       | 2 | 1.000 |
| G3MW09 | G3MW09 BOVIN | Bt.82323  | Uncharacterized protein            | 0.999 | 2.88                              | 2 | 2     |
|        |              |           |                                    |       | IDGILTSIGLHDLRKK                  | 3 | 0.999 |
|        |              |           |                                    |       | ILKSSYLKGMNLASFVAVSK              | 3 | 0.999 |
| G3MWN6 | G3MWN6 BOVIN | ABCA2     | Uncharacterized protein (Fragment) | 1.000 | 2.98                              | 3 | 3     |
|        |              |           |                                    |       | CTCSGGQGTGFCSPGGVGGHPQMR          | 3 | 0.999 |
|        |              |           |                                    |       | RKLSTAIALIGYPAFIVLSP              | 3 | 0.851 |
|        |              |           |                                    |       | TPRLSVMEEQDQACAMESR               | 3 | 0.999 |
| G3MXA5 | G3MXA5 BOVIN | Bt.74139  | Uncharacterized protein            | 0.999 | 4.62                              | 2 | 2     |
|        |              |           |                                    |       | ANSLGDLYAQKNVGTANGGPR             | 3 | 0.999 |
|        |              |           |                                    |       | NSGVTANGGPRSKLAGYCR               | 3 | 0.999 |
| G3MXC3 | G3MXC3 BOVIN | LTBP4     | Uncharacterized protein (Fragment) | 0.999 | 3.44                              | 2 | 2     |
|        |              |           |                                    |       | PPSGSPKKGEMIR                     | 3 | 0.999 |
|        |              |           |                                    |       | SEAAAPYTVLAQSAAPREDGYSDASGFYCYFR  | 3 | 0.999 |
| G3MXE8 | G3MXE8 BOVIN |           | Uncharacterized protein (Fragment) | 0.999 | 2.1                               | 2 | 2     |
|        |              |           |                                    |       | AIFFTPKENMSSSILFSAAPLSCK          | 3 | 0.805 |
|        |              |           |                                    |       | LMETLQGAEPYFKCIR                  | 3 | 0.999 |
| G3MXJ0 | G3MXJ0 BOVIN | LOC531152 | Uncharacterized protein (Fragment) | 0.999 | 8.8                               | 2 | 2     |
|        |              |           |                                    |       | NLSHVKGGCVLGGFLKLLPMFISVMPGMISR   | 3 | 0.999 |
|        |              |           |                                    |       | PTVTOEGNWTAPMECFVPRADAFHVFR       | 3 | 0.999 |
| G3MXU5 | G3MXU5 BOVIN |           | Uncharacterized protein            | 0.999 | 4.47                              | 2 | 2     |
|        |              |           |                                    |       | NEDNRTSVGTNYESR                   | 3 | 0.999 |
|        |              |           |                                    |       | VRTQAVMLGARQPTETVAVTETHPK         | 3 | 0.999 |
| G3MXX3 | G3MXX3 BOVIN | Bt.103298 | Uncharacterized protein (Fragment) | 0.999 | 2.6                               | 2 | 2     |
|        |              |           |                                    |       | KFNYGGGNSNLWGGSDRHQHQEQHWYK       | 3 | 0.999 |
|        |              |           |                                    |       | RQAQRSSASESETDDSDDK               | 3 | 0.999 |
| G3MXX8 | G3MXX8 BOVIN | SCRT1     | Uncharacterized protein            | 0.999 | 17.33                             | 2 | 2     |
|        |              |           |                                    |       | AGAGTEARAGPGAGSSGGRHACGECGK       | 3 | 0.999 |
|        |              |           |                                    |       | PELATAAGGYINGDAVSEGYAADAFFITDGRSR | 3 | 0.999 |
| G3MYU1 | G3MYU1 BOVIN | Bt.20209  | Uncharacterized protein            | 0.999 | 9.04                              | 2 | 2     |
|        |              |           |                                    |       | PPGSNINGVPPNPTPIVQRLPAFLDNHNYAK   | 3 | 0.999 |
|        |              |           |                                    |       | PSSPVTSHISVLFGEDDLSLRVDCIRYNR     | 3 | 0.999 |
| G3MYU9 | G3MYU9 BOVIN | Bt.105569 | Uncharacterized protein            | 0.999 | 8.62                              | 2 | 2     |
|        |              |           |                                    |       | SLLNHNETSAHRQKTESALNALLQR         | 3 | 0.999 |
|        |              |           |                                    |       | VSLPLRTNLYGK                      | 3 | 0.999 |
| G3MZ21 | G3MZ21 BOVIN |           | Uncharacterized protein            | 1.000 | 33.04                             | 3 | 3     |
|        |              |           |                                    |       | AAVTSLFAK                         | 2 | 0.997 |
|        |              |           |                                    |       | FFESFGDLSSADAILGNPK               | 2 | 1.000 |
|        |              |           |                                    |       | LLVYYPWTQR                        | 2 | 0.980 |
| G3MZM6 | G3MZM6 BOVIN | RRP1B     | Uncharacterized protein            | 0.999 | 7.34                              | 2 | 2     |
|        |              |           |                                    |       | ELGALLVNGSGPPVLAWPLPQREGPPANPADRR | 3 | 0.999 |
|        |              |           |                                    |       | LVPALCRTPEGQGGGAHGPKL             | 3 | 0.999 |
| G3N078 | G3N078 BOVIN | ZNF215    | Uncharacterized protein            | 1.000 | 7.01                              | 2 | 2     |
|        |              |           |                                    |       | HQKHAATKAWEGNCCGK                 | 3 | 0.999 |
|        |              |           |                                    |       | NLNSLHKEHLLSKPVTESK               | 3 | 0.999 |
| G3N0C1 | G3N0C1 BOVIN | ANK2      | Uncharacterized protein (Fragment) | 1.000 | 2.22                              | 2 | 2     |
|        |              |           |                                    |       | DLEFCLVTNNGTVSIEHITRIDMTSEKSK     | 3 | 0.844 |
|        |              |           |                                    |       | FCCFSFLSLLGLSITCLSK               | 3 | 0.999 |
| G3N0D7 | G3N0D7 BOVIN | CBLB      | Uncharacterized protein (Fragment) | 1.000 | 4.63                              | 2 | 2     |
|        |              |           |                                    |       | ASQDYDPLPSSSDGSGQAPARPPK          | 3 | 0.999 |
|        |              |           |                                    |       | RALEIAQNNVEVAR                    | 3 | 0.832 |
| G3N0V2 | G3N0V2 BOVIN | Bt.96692  | Uncharacterized protein            | 1.000 | 6.77                              | 5 | 5     |
|        |              |           |                                    |       | AQYEEIAQR                         | 2 | 0.973 |
|        |              |           |                                    |       | DYQELMNTK                         | 2 | 0.990 |
|        |              |           |                                    |       | KYEDEINKR                         | 3 | 1.000 |
|        |              |           |                                    |       | SLNNQFASFIDK                      | 2 | 0.999 |
|        |              |           |                                    |       | SLNNQFASFIDKVR                    | 3 | 1.000 |
| G3N0X4 | G3N0X4 BOVIN |           | Uncharacterized protein (Fragment) | 0.999 | 12.87                             | 2 | 2     |
|        |              |           |                                    |       | GHOAVVAPEVNLHIK                   | 3 | 0.999 |
|        |              |           |                                    |       | VHFLTMFWEAMATLKNVLLFER            | 3 | 0.999 |
| G3N1C8 | G3N1C8 BOVIN | DNAH1     | Uncharacterized protein            | 1.000 | 1.43                              | 3 | 3     |
|        |              |           |                                    |       | FGPLGFNIPYFTDGDRLICISOLK          | 3 | 0.999 |
|        |              |           |                                    |       | TPPLPLSVTPMPSDLGQPRK              | 3 | 0.999 |
|        |              |           |                                    |       | VFQGLMLMADPAKVEDK                 | 3 | 0.999 |
| G3N1N7 | G3N1N7 BOVIN | MKI67     | Uncharacterized protein            | 0.999 | 1.64                              | 2 | 2     |
|        |              |           |                                    |       | PQQTPTGETTHSPREPEDGDRGTAVSQEAPEEK | 3 | 0.999 |
|        |              |           |                                    |       | PVAHGEDVTATHAVSGR                 | 3 | 0.999 |
| G3N1Y3 | G3N1Y3 BOVIN |           | Uncharacterized protein (Fragment) | 1.000 | 45.3                              | 4 | 4     |
|        |              |           |                                    |       | FFESFGDLSSADAILGNPK               | 2 | 1.000 |

|          |              |          |                                    |       |  |                                |    |       |
|----------|--------------|----------|------------------------------------|-------|--|--------------------------------|----|-------|
|          |              |          |                                    |       |  | LLGNLVVVLAR                    | 2  | 1.000 |
|          |              |          |                                    |       |  | LLVVPWTQR                      | 2  | 0.980 |
|          |              |          |                                    |       |  | VVTGVANALHR                    | 2  | 1.000 |
| G3N2E4   | G3N2E4_BOVIN | TCTN1    | Uncharacterized protein            | 0.999 |  | 7.14                           | 2  | 2     |
|          |              |          |                                    |       |  | ALTCRLVAQKMK                   | 3  | 0.999 |
|          |              |          |                                    |       |  | STTEQDCLAAEGIRAPVLFYGNMQSGCKLR | 3  | 0.999 |
| G3N356   | G3N356_BOVIN | ZSCAN30  | Uncharacterized protein            | 0.999 |  | 5.76                           | 2  | 2     |
|          |              |          |                                    |       |  | HCGEDRNSVWAGEFIGMKM            | 3  | 0.999 |
|          |              |          |                                    |       |  | SFNQNSALTDQHR                  | 3  | 0.999 |
| G3X684   | G3X684_BOVIN | TOPBP1   | Uncharacterized protein            | 0.999 |  | 3.08                           | 2  | 2     |
|          |              |          |                                    |       |  | AFRTVMSQHSQQASVSPSPGQSLQK      | 3  | 0.999 |
|          |              |          |                                    |       |  | DAHSEKEDAPKPLENVVVCVSK         | 3  | 0.999 |
| G3X6N3   | G3X6N3_BOVIN | Bt.5336  | Uncharacterized protein            | 1.000 |  | 12.78                          | 8  | 8     |
| Q29443   | TRFE_BOVIN   | TF       | Serotransferrin                    | 1.000 |  | 12.78                          | 8  | 8     |
|          |              |          |                                    |       |  | DQTVIQNTDGNNEAWAK              | 2  | 1.000 |
|          |              |          |                                    |       |  | GYLAVAVVK                      | 2  | 0.914 |
|          |              |          |                                    |       |  | HSTVFDNLNPNEDRK                | 3  | 1.000 |
|          |              |          |                                    |       |  | KTYDSYLGDDYVR                  | 3  | 1.000 |
|          |              |          |                                    |       |  | LYKELPDPQESIQR                 | 3  | 0.999 |
|          |              |          |                                    |       |  | TSDANINWNNLK                   | 2  | 0.994 |
|          |              |          |                                    |       |  | TYDSYLGDDYVR                   | 2  | 0.938 |
|          |              |          |                                    |       |  | YYGYTGAFR                      | 2  | 0.901 |
| G3X6V3   | G3X6V3_BOVIN |          | Uncharacterized protein (Fragment) | 0.999 |  | 2.87                           | 2  | 2     |
|          |              |          |                                    |       |  | KPSQSSDLSKNVTTAPT              | 3  | 0.999 |
|          |              |          |                                    |       |  | SATLPAMLQPQVPEAPEVWFSLAKK      | 3  | 0.999 |
| G3X7A5   | G3X7A5_BOVIN | Bt.19562 | Uncharacterized protein            | 1.000 |  | 1.2                            | 2  | 2     |
| Q2UVX4   | CO3_BOVIN    | C3       | Complement C3                      | 1.000 |  | 1.2                            | 2  | 2     |
|          |              |          |                                    |       |  | AGQYSSDLRK                     | 3  | 1.000 |
|          |              |          |                                    |       |  | ILWESASLLR                     | 2  | 0.994 |
| G3X7E3   | G3X7E3_BOVIN | Bt.90677 | Uncharacterized protein            | 0.999 |  | 4.82                           | 2  | 2     |
|          |              |          |                                    |       |  | EEVEVKESDVLESASSHSLSTK         | 3  | 0.999 |
|          |              |          |                                    |       |  | SEGNEKGEDAEVLETMPGILK          | 3  | 0.999 |
| G3X7Z2   | G3X7Z2_BOVIN | Bt.286   | Uncharacterized protein            | 0.987 |  | 1.8                            | 2  | 2     |
|          |              |          |                                    |       |  | GGGAGVAGGPGGGLQPGQRVLYK        | 3  | 0.885 |
|          |              |          |                                    |       |  | PEGGEAGEGADPPRRHHR             | 3  | 0.856 |
| G5E580   | G5E580_BOVIN | Bt.67708 | Uncharacterized protein            | 0.999 |  | 2.46                           | 2  | 2     |
|          |              |          |                                    |       |  | IPNHVFEIDEDCEKEDSSSLCSQKGGVIK  | 3  | 0.999 |
|          |              |          |                                    |       |  | PIFKDIQGSLDVDRGRFSPLYK         | 3  | 0.999 |
| G5E5A7   | G5E5A7_BOVIN | MUC5B    | Uncharacterized protein            | 0.999 |  | 0.57                           | 2  | 2     |
|          |              |          |                                    |       |  | LVNTS5YLEACRHDLCCHSR           | 3  | 0.999 |
|          |              |          |                                    |       |  | VNESWFLEDCTVAR                 | 3  | 0.999 |
| G5E5V6   | G5E5V6_BOVIN | CGNL1    | Uncharacterized protein            | 0.999 |  | 2.94                           | 2  | 2     |
|          |              |          |                                    |       |  | PLPTPSLQAHLEAKKTR              | 3  | 0.999 |
|          |              |          |                                    |       |  | SRAAGSTQGNNAQASNSSEVK          | 3  | 0.999 |
| G5E5W1   | G5E5W1_BOVIN | Bt.1262  | Uncharacterized protein            | 0.999 |  | 2.37                           | 2  | 2     |
|          |              |          |                                    |       |  | ECQIPLGMASGRIRDFQITASQYQGWAPK  | 3  | 0.999 |
|          |              |          |                                    |       |  | ISSSSNNLMPLTIPSDKLSAGTKK       | 3  | 0.999 |
| Q0VCK5   | AP2A2_BOVIN  | AP2A2    | AP-2 complex subunit alpha-2       | 0.999 |  | 5.22                           | 2  | 2     |
| G5E675   | G5E675_BOVIN | AP2A2    | Uncharacterized protein (Fragment) | 0.999 |  | 5.36                           | 2  | 2     |
|          |              |          |                                    |       |  | IIGFSALLLEEDPNPANFVGGAIHTR     | 3  | 0.999 |
|          |              |          |                                    |       |  | SDSOLKNADVELQQRVAYELR          | 3  | 0.999 |
| O97817-2 | LPHN2_BOVIN  | LPHN2    | Isoform 2 of Latrophilin-2         | 0.999 |  | 3.4                            | 2  | 2     |
| O97817-3 | LPHN2_BOVIN  | LPHN2    | Isoform 3 of Latrophilin-2         | 0.999 |  | 3.43                           | 2  | 2     |
| O97817-4 | LPHN2_BOVIN  | LPHN2    | Isoform 4 of Latrophilin-2         | 0.999 |  | 3.44                           | 2  | 2     |
|          |              |          |                                    |       |  | AKPEGTDSYVSQLTAEAEHDHLSQPNR    | 3  | 0.999 |
|          |              |          |                                    |       |  | YSLEFGPPDPAQERFCEALDAR         | 3  | 0.999 |
| P01044   | KNG1_BOVIN   | KNG1     | Kininogen-1                        | 0.992 |  | 3.38                           | 2  | 2     |
| P01045   | KNG2_BOVIN   | KNG2     | Kininogen-2                        | 0.992 |  | 3.39                           | 2  | 2     |
|          |              |          |                                    |       |  | LISDFPETTSPK                   | 2  | 0.914 |
|          |              |          |                                    |       |  | SPDLEPVL                       | 2  | 0.907 |
| P01966   | HBA_BOVIN    | HBA      | Hemoglobin subunit alpha           | 1.000 |  | 42.96                          | 5  | 6     |
|          |              |          |                                    |       |  | FLANVSTVLTSK                   | 2  | 0.994 |
|          |              |          |                                    |       |  | LRVDPVNFK                      | 3  | 1.000 |
|          |              |          |                                    |       |  | MFLSFPTTK                      | 2  | 0.999 |
|          |              |          |                                    |       |  | TYFFPHFDLSHGSAQVK              | 3  | 1.000 |
|          |              |          |                                    |       |  | VGGHAAEYGAELER                 | 2  | 1.000 |
|          |              |          |                                    |       |  | VGGHAAEYGAELER                 | 3  | 1.000 |
| P02465   | CO1A2_BOVIN  | COL1A2   | Collagen alpha-2(I) chain          | 0.999 |  | 3.3                            | 2  | 2     |
|          |              |          |                                    |       |  | GAAGIPGGKGEKGETGLR             | 3  | 0.861 |
|          |              |          |                                    |       |  | PKDYVDATLKSLLNQIETLLTPEGR      | 3  | 0.999 |
| P02662   | CASA1_BOVIN  | CSN1S1   | Alpha-S1-casein                    | 1.000 |  | 17.29                          | 3  | 4     |
|          |              |          |                                    |       |  | FFVAPPPEVFGK                   | 2  | 0.972 |
|          |              |          |                                    |       |  | HQGLPQEVLENLLR                 | 2  | 0.999 |
|          |              |          |                                    |       |  | HQGLPQEVLENLLR                 | 3  | 0.999 |
|          |              |          |                                    |       |  | YLGYLEQLLR                     | 2  | 0.999 |
| P02769   | ALBU_BOVIN   | ALB      | Serum albumin                      | 1.000 |  | 32.62                          | 19 | 27    |
|          |              |          |                                    |       |  | DAFLGSFLYEYSR                  | 2  | 1.000 |
|          |              |          |                                    |       |  | DLGEEHFK                       | 2  | 0.989 |
|          |              |          |                                    |       |  | FKDLGEEHFK                     | 2  | 0.945 |
|          |              |          |                                    |       |  | FKDLGEEHFK                     | 3  | 1.000 |
|          |              |          |                                    |       |  | GLVLIAFSQYLQCCPFDEHVK          | 3  | 1.000 |
|          |              |          |                                    |       |  | HLVDEPQNLK                     | 2  | 1.000 |
|          |              |          |                                    |       |  | HLVDEPQNLK                     | 3  | 1.000 |
|          |              |          |                                    |       |  | HPEYAVSVLLR                    | 2  | 0.995 |
|          |              |          |                                    |       |  | HPEYAVSVLLR                    | 3  | 0.897 |
|          |              |          |                                    |       |  | KQTALVELLK                     | 2  | 0.992 |
|          |              |          |                                    |       |  | KQTALVELLK                     | 3  | 1.000 |
|          |              |          |                                    |       |  | KVPQVSTPTLVEVSR                | 2  | 1.000 |
|          |              |          |                                    |       |  | KVPQVSTPTLVEVSR                | 3  | 1.000 |
|          |              |          |                                    |       |  | LCVLHEKTPVSEKVTK               | 3  | 0.864 |
|          |              |          |                                    |       |  | LGEYGFQNALIVR                  | 2  | 1.000 |
|          |              |          |                                    |       |  | LSQKFPK                        | 2  | 0.863 |
|          |              |          |                                    |       |  | LVNELTEFAK                     | 1  | 1.000 |
|          |              |          |                                    |       |  | LVNELTEFAK                     | 2  | 1.000 |
|          |              |          |                                    |       |  | LVVSTQATAL                     | 2  | 0.993 |
|          |              |          |                                    |       |  | MPCTEDYLSLILNR                 | 2  | 0.999 |
|          |              |          |                                    |       |  | RHPEYAVSVLLR                   | 2  | 0.989 |
|          |              |          |                                    |       |  | RHPEYAVSVLLR                   | 3  | 1.000 |
|          |              |          |                                    |       |  | SLHTLFGDELCK                   | 2  | 0.999 |
|          |              |          |                                    |       |  | SLHTLFGDELCK                   | 3  | 1.000 |
|          |              |          |                                    |       |  | TVMENFVAFVDK                   | 2  | 1.000 |
|          |              |          |                                    |       |  | VPQVSTPTLVEVSR                 | 2  | 1.000 |
|          |              |          |                                    |       |  | YICDNQDTISSK                   | 2  | 1.000 |
| P12763   | FETUA_BOVIN  | AHSG     | Alpha-2-HS-glycoprotein            | 1.000 |  | 39.83                          | 10 | 12    |
|          |              |          |                                    |       |  | AQFVPLPVSVSVEFAVAATDCIAK       | 2  | 1.000 |
|          |              |          |                                    |       |  | AQFVPLPVSVSVEFAVAATDCIAK       | 3  | 1.000 |
|          |              |          |                                    |       |  | EVVDPTK                        | 1  | 0.927 |
|          |              |          |                                    |       |  | EVVDPTKCNLLAEK                 | 3  | 0.963 |
|          |              |          |                                    |       |  | GKHTLNQIDSVK                   | 3  | 1.000 |

|        |              |           |                                                               |       |                                |    |       |
|--------|--------------|-----------|---------------------------------------------------------------|-------|--------------------------------|----|-------|
|        |              |           |                                                               |       | HTFSGVASVSSSSGEAFHV GK         | 2  | 1.000 |
|        |              |           |                                                               |       | HTFSGVASVSSSSGEAFHV GK         | 3  | 1.000 |
|        |              |           |                                                               |       | HTLNQIDSVK                     | 2  | 1.000 |
|        |              |           |                                                               |       | QDGFQSVLFTK                    | 2  | 1.000 |
|        |              |           |                                                               |       | QQTQHAVEGDCDIHVLK              | 3  | 0.941 |
|        |              |           |                                                               |       | TPVIGQPSIPGGPVR                | 2  | 1.000 |
|        |              |           |                                                               |       | VVHAVEVALTFNAESNGSYLQLVEISR    | 3  | 1.000 |
| P15497 | APOA1_BOVIN  | APOA1     | Apolipoprotein A-I                                            | 1.000 | 36.6                           | 9  | 9     |
|        |              |           |                                                               |       | DYVAQFEASALGK                  | 2  | 0.999 |
|        |              |           |                                                               |       | LEALKEGGGSLAEYHAK              | 3  | 0.999 |
|        |              |           |                                                               |       | LLDNWDTLASTLSK                 | 2  | 1.000 |
|        |              |           |                                                               |       | LSPLAQELR                      | 2  | 0.927 |
|        |              |           |                                                               |       | QQLAPYSDDL                     | 2  | 0.983 |
|        |              |           |                                                               |       | VKDFATVYVEAIK                  | 3  | 0.933 |
|        |              |           |                                                               |       | VOELQDKLSPLAQELR               | 3  | 0.999 |
|        |              |           |                                                               |       | VSILAAIDEASK                   | 2  | 0.932 |
|        |              |           |                                                               |       | VSILAAIDEASK                   | 3  | 1.000 |
| P34955 | A1AT_BOVIN   | SERPINA1  | Alpha-1-antiproteinase                                        | 1.000 | 23.32                          | 10 | 11    |
|        |              |           |                                                               |       | DFHVDEQTTVK                    | 2  | 0.995 |
|        |              |           |                                                               |       | HTTERDFHVDEQTTVK               | 3  | 1.000 |
|        |              |           |                                                               |       | KYASSANLHLPK                   | 3  | 1.000 |
|        |              |           |                                                               |       | LGMFDLHYCDK                    | 3  | 1.000 |
|        |              |           |                                                               |       | LQQLQEDKLNELLAK                | 2  | 0.996 |
|        |              |           |                                                               |       | LQQLQEDKLNELLAK                | 3  | 1.000 |
|        |              |           |                                                               |       | LSISETYDLK                     | 2  | 1.000 |
|        |              |           |                                                               |       | LVDTFLEDVK                     | 2  | 0.999 |
|        |              |           |                                                               |       | SVLGDVIGITEVFSDR               | 2  | 1.000 |
|        |              |           |                                                               |       | SVLGDVIGITEVFSDRADLSGITK       | 3  | 1.000 |
|        |              |           |                                                               |       | YASSANLHLPK                    | 2  | 0.875 |
| P56722 | PTPRN_BOVIN  | PTPRN     | Receptor-type tyrosine-protein phosphatase-like N             | 1.000 | 5.01                           | 2  | 2     |
|        |              |           |                                                               |       | PSAEYGYIVTDQKPLSLAAGVR         | 3  | 0.999 |
|        |              |           |                                                               |       | SVLLTLVALAGVAGLLVALVALCVR      | 3  | 0.999 |
| P62285 | ASPM_BOVIN   | ASPM      | Abnormal spindle-like microcephaly-associated protein homolog | 0.999 | 1.07                           | 2  | 2     |
|        |              |           |                                                               |       | TESQHEAGESPALVAQGLYK           | 3  | 0.999 |
|        |              |           |                                                               |       | VCHAAVVIQRYRAHR                | 3  | 0.999 |
| P79134 | ANXA6_BOVIN  | ANXA6     | Annexin A6                                                    | 0.999 | 4.9                            | 2  | 2     |
|        |              |           |                                                               |       | LILGLMPPAHYDAK                 | 3  | 0.999 |
|        |              |           |                                                               |       | SLYKDLIADLKYELTGK              | 3  | 0.999 |
| P81644 | APOA2_BOVIN  | APOA2     | Apolipoprotein A-II                                           | 1.000 | 49                             | 5  | 7     |
|        |              |           |                                                               |       | AGTDLNLFSSFDPK                 | 2  | 1.000 |
|        |              |           |                                                               |       | KAGTDLNLFSSFDPK                | 2  | 0.930 |
|        |              |           |                                                               |       | KAGTDLNLFSSFDPK                | 3  | 1.000 |
|        |              |           |                                                               |       | MKLLALTVLLLTICGLEGALVR         | 3  | 0.884 |
|        |              |           |                                                               |       | TQEELTPFFK                     | 2  | 0.999 |
|        |              |           |                                                               |       | TQEELTPFFK                     | 2  | 0.966 |
|        |              |           |                                                               |       | TQEELTPFFK                     | 3  | 1.000 |
| Q08D91 | K2C75_BOVIN  | KRT75     | Keratin, type II cytoskeletal 75                              | 1.000 | 5.71                           | 2  | 3     |
|        |              |           |                                                               |       | AQYEEIANR                      | 3  | 0.989 |
|        |              |           |                                                               |       | LRAEIDNVKK                     | 3  | 0.999 |
|        |              |           |                                                               |       | SLDLDISIAEVK                   | 2  | 0.999 |
| Q0III9 | ACTN3_BOVIN  | ACTN3     | Alpha-actinin-3                                               | 1.000 | 3.55                           | 2  | 2     |
|        |              |           |                                                               |       | LVSDIANAWRGLEQAEK              | 3  | 0.999 |
|        |              |           |                                                               |       | LVSIGAEIIVDGNLK                | 3  | 0.999 |
| Q0P5J8 | FA40A_BOVIN  | FAM40A    | Protein FAM40A                                                | 1.000 | 3.58                           | 2  | 2     |
|        |              |           |                                                               |       | EVFSKPISEWELLQ                 | 3  | 0.809 |
|        |              |           |                                                               |       | TAGLLPGGKAREFNR                | 3  | 0.999 |
| Q0VCD2 | TBG1_BOVIN   | TUBG1     | Tubulin gamma-1 chain                                         | 0.999 | 10.86                          | 2  | 2     |
| Q32KM1 | TBG2_BOVIN   | TUBG2     | Tubulin gamma-2 chain                                         | 0.999 | 10.86                          | 2  | 2     |
|        |              |           |                                                               |       | LHFLMTGYPLTTDQSVASVRKTTVLVDVMR | 3  | 0.999 |
|        |              |           |                                                               |       | RLTQNADCVVLDNTALNR             | 3  | 0.999 |
| Q17QL7 | Q17QL7_BOVIN | KRT15     | KRT15 protein                                                 | 1.000 | 7.06                           | 3  | 3     |
|        |              |           |                                                               |       | ALEEANADLEVK                   | 2  | 0.999 |
|        |              |           |                                                               |       | QSVEADINGLR                    | 2  | 0.991 |
|        |              |           |                                                               |       | VLDELTLTK                      | 2  | 1.000 |
| Q17QU7 | DHR13_BOVIN  | DHRS13    | Dehydrogenase/reductase SDR family member 13                  | 0.999 | 9.81                           | 2  | 2     |
|        |              |           |                                                               |       | APPCRGLASLRGR                  | 3  | 0.999 |
|        |              |           |                                                               |       | MEALLGVGLLLGAYVLVYYNLVKAPPCCR  | 3  | 0.999 |
| Q17QW1 | BORG5_BOVIN  | CDC42EP1  | Cdc42 effector protein 1                                      | 1.000 | 10.53                          | 2  | 2     |
|        |              |           |                                                               |       | LSPVGWVSSSQGKRR                | 3  | 0.999 |
|        |              |           |                                                               |       | SPASSTDGHSAYGLDSGFCTISR        | 3  | 0.999 |
| Q1JQC5 | RMD3_BOVIN   | FAM82A2   | Regulator of microtubule dynamics protein 3                   | 1.000 | 16.14                          | 3  | 3     |
|        |              |           |                                                               |       | AGLGLLLGTAAGLFLCALYSQRWK       | 3  | 0.999 |
|        |              |           |                                                               |       | DSERESDGDGEDEVSCETVKMGR        | 3  | 0.999 |
|        |              |           |                                                               |       | LALELPNVTKEDSAFOKDLLEEVILGE    | 3  | 0.999 |
| Q27991 | MYH10_BOVIN  | MYH10     | Myosin-10                                                     | 0.999 | 1.72                           | 2  | 2     |
|        |              |           |                                                               |       | ESLTKLMATLRNTNPNFVR            | 3  | 0.999 |
|        |              |           |                                                               |       | IRNKQEVMSIDLEER                | 3  | 0.999 |
| Q2HJG5 | VPS35_BOVIN  | VPS35     | Vacuolar protein sorting-associated protein 35                | 0.999 | 3.02                           | 2  | 2     |
|        |              |           |                                                               |       | ALKIANQCMDPSLQVQLFIEILNR       | 3  | 0.999 |
|        |              |           |                                                               |       | IANOCMDPSLQVQLFIEILNR          | 3  | 0.999 |
| Q2NKS5 | Q2NKS5_BOVIN | MGC137053 | Putative uncharacterized protein MGC137053                    | 0.999 | 20.59                          | 2  | 2     |
|        |              |           |                                                               |       | PKLLQHYLHAGVSECLNWSR           | 3  | 0.999 |
|        |              |           |                                                               |       | PQPPAVFLQRCQEPQPHFFSK          | 3  | 0.999 |
| Q2TA17 | ZN668_BOVIN  | ZNF668    | Zinc finger protein 668                                       | 0.999 | 5.82                           | 2  | 2     |
|        |              |           |                                                               |       | MFSDPSSFR                      | 1  | 0.999 |
|        |              |           |                                                               |       | THPVPIGTPTLEPLVALLGMPEEGPA     | 3  | 0.999 |
| Q2TBM9 | SRAC1_BOVIN  | SERAC1    | Protein SERAC1                                                | 0.999 | 6.73                           | 2  | 2     |
|        |              |           |                                                               |       | IFRGPADTFSTVDIEDHDCAVWLLLR     | 3  | 0.999 |
|        |              |           |                                                               |       | ILGNMALNEHLHSTIVR              | 3  | 0.999 |
| Q32PG0 | Q32PG0_BOVIN | WWP1      | Uncharacterized protein                                       | 1.000 | 2.71                           | 2  | 2     |
|        |              |           |                                                               |       | DPRNGKSSVTK                    | 3  | 0.999 |
|        |              |           |                                                               |       | FIGRFIAMALFHGK                 | 3  | 0.999 |
| Q3MHY7 | RM10_BOVIN   | MRPL10    | 39S ribosomal protein L10, mitochondrial                      | 0.999 | 16.03                          | 2  | 2     |
|        |              |           |                                                               |       | LPSLALAQGELVGLTLLTAR           | 3  | 0.999 |
|        |              |           |                                                               |       | YQNLPLFVGHNLLLVSEEPK           | 3  | 0.999 |
| Q3ZC31 | HEM0_BOVIN   | ALAS2     | 5-aminolevulinate synthase, erythroid-specific, mitochondrial | 1.000 | 10.73                          | 4  | 4     |
|        |              |           |                                                               |       | ICDLLLLSKYGIYQAINPTVPR         | 3  | 0.999 |
|        |              |           |                                                               |       | LLEAWTEVGLPLQDISIAACNFCR       | 3  | 0.999 |
|        |              |           |                                                               |       | NSGAAKFVFR                     | 3  | 0.999 |
|        |              |           |                                                               |       | YGIYQAINPTVPRGEELLR            | 3  | 0.857 |
| Q58D62 | FETUB_BOVIN  | FETUB     | Fetuin-B                                                      | 1.000 | 7.49                           | 2  | 2     |
|        |              |           |                                                               |       | FMETATESLAK                    | 2  | 0.999 |
|        |              |           |                                                               |       | TSSQWVFGPAYFVEYLK              | 2  | 0.992 |
| Q5E9N5 | CLPB_BOVIN   | CLPB      | Caseinolytic peptidase B protein homolog                      | 0.999 | 2.95                           | 2  | 2     |
|        |              |           |                                                               |       | IAENLGDVQISDKITISK             | 3  | 0.999 |
|        |              |           |                                                               |       | NRIAENLGDVQISDKITISK           | 3  | 0.999 |
| Q5EA98 | MFAP1_BOVIN  | MFAP1     | Microfibrillar-associated protein 1                           | 0.999 | 7.29                           | 2  | 2     |

|        |             |          |                                                                                                     |       |                                  |   |       |
|--------|-------------|----------|-----------------------------------------------------------------------------------------------------|-------|----------------------------------|---|-------|
|        |             |          |                                                                                                     |       | AQERKNEELEVMEVEDEGR              | 3 | 0.999 |
|        |             |          |                                                                                                     |       | RLQNRISEDVEER                    | 3 | 0.999 |
| Q9BG10 | GABT_BOVIN  | ABAT     | 4-aminobutyrate aminotransferase, mitochondrial                                                     | 0.999 | 16                               | 3 | 3     |
|        |             |          |                                                                                                     |       | GTFCSEFDTPDDSIKLNKLIAR           | 3 | 0.999 |
|        |             |          |                                                                                                     |       | KTVAGIIVEPIQSEGGDNHASDDFRK       | 3 | 0.999 |
|        |             |          |                                                                                                     |       | LRQSLLSVAPKGMSQLITMACGSCSNEGLK   | 3 | 0.999 |
| Q9N212 | IPSP_BOVIN  | SERPINA5 | Plasma serine protease inhibitor                                                                    | 1.000 | 12.13                            | 2 | 2     |
|        |             |          |                                                                                                     |       | STHEQDFYVTPETVVR                 | 3 | 0.999 |
|        |             |          |                                                                                                     |       | VSEMVHKAVVEDESGTQAAAATGMVITFKSAR | 3 | 0.999 |
| Q9TTA5 | SMAL1_BOVIN | SMARCAL1 | SWI/SNF-related matrix-associated actin-dependent regulator of chromatin subfamily A-like protein 1 | 1.000 | 4.14                             | 2 | 2     |
|        |             |          |                                                                                                     |       | IPSIEYILDLLLESGREK               | 3 | 0.999 |
|        |             |          |                                                                                                     |       | SMPGPEPPWMPPAKEMTTKDK            | 3 | 0.999 |



Supporting Information Table 2. Quantification of all proteins associated with NTs.

| Protein ID | Protein Entry | Gene Name | Protein Name            | Human Homolog                                                                  | mean MWCNT- RAW | mean MWCNT- PURE | mean MWCNT- RAW | mean MWCNT- PURE | mean MWCNT- RAW | mean MWCNT- PURE | SEM MWCNT- RAW | SEM MWCNT- PURE |
|------------|---------------|-----------|-------------------------|--------------------------------------------------------------------------------|-----------------|------------------|-----------------|------------------|-----------------|------------------|----------------|-----------------|----------------|-----------------|----------------|-----------------|----------------|-----------------|
| E1B104     | EIF572        | XIRP2     | Uncharacterized protein | Xin actin-binding repeat-containing protein 2                                  | 303.027,900     | 306.126,891      | 303.027,900     | 306.126,891      | 303.027,900     | 306.126,891      | 30.208,342     | 30.208,342      | 30.208,342     | 30.208,342      | 30.208,342     | 30.208,342      | 30.208,342     | 30.208,342      |
| E1B105     | EIF573        | TIN       | Uncharacterized protein | Tin                                                                            | 222,285,701     | 287,786,014      | 222,285,701     | 287,786,014      | 222,285,701     | 287,786,014      | 15,613,039     | 15,613,039      | 15,613,039     | 15,613,039      | 15,613,039     | 15,613,039      | 15,613,039     | 15,613,039      |
| E1B106     | EIF574        | NCOA6     | Uncharacterized protein | Nuclear receptor coactivator 6                                                 | 217,553,081     | 235,313,725      | 217,553,081     | 235,313,725      | 217,553,081     | 235,313,725      | 3,918,956      | 3,918,956       | 3,918,956      | 3,918,956       | 3,918,956      | 3,918,956       | 3,918,956      | 3,918,956       |
| E1B107     | EIF575        | ALB       | Uncharacterized protein | Serum albumin                                                                  | 175,003,916     | 228,617,883      | 175,003,916     | 228,617,883      | 175,003,916     | 228,617,883      | 31,673,488     | 31,673,488      | 31,673,488     | 31,673,488      | 31,673,488     | 31,673,488      | 31,673,488     | 31,673,488      |
| E1B108     | EIF576        | P2RX5     | Uncharacterized protein | P2X purinergic receptor 5                                                      | 28,639,533      | 28,639,533       | 28,639,533      | 28,639,533       | 28,639,533      | 28,639,533       | 3,953,469      | 3,953,469       | 3,953,469      | 3,953,469       | 3,953,469      | 3,953,469       | 3,953,469      | 3,953,469       |
| E1B109     | EIF577        | ATAD2B    | Uncharacterized protein | ATPase family AAA domain-containing protein 2B                                 | 24,960,567      | 24,960,567       | 24,960,567      | 24,960,567       | 24,960,567      | 24,960,567       | 2,642,280      | 2,642,280       | 2,642,280      | 2,642,280       | 2,642,280      | 2,642,280       | 2,642,280      | 2,642,280       |
| E1B110     | EIF578        | ALS2      | Uncharacterized protein | ALS2 C-terminal-like protein                                                   | 24,281,533      | 24,281,533       | 24,281,533      | 24,281,533       | 24,281,533      | 24,281,533       | 1,619,744      | 1,619,744       | 1,619,744      | 1,619,744       | 1,619,744      | 1,619,744       | 1,619,744      | 1,619,744       |
| E1B111     | EIF579        | LC7       | Uncharacterized protein | Lactase-phi-ribin hydrolase                                                    | 34,493,021      | 34,493,021       | 34,493,021      | 34,493,021       | 34,493,021      | 34,493,021       | 1,902,402      | 1,902,402       | 1,902,402      | 1,902,402       | 1,902,402      | 1,902,402       | 1,902,402      | 1,902,402       |
| E1B112     | EIF580        | KIF7      | Uncharacterized protein | Kinesin-like protein in KIF7                                                   | 44,527,167      | 44,527,167       | 44,527,167      | 44,527,167       | 44,527,167      | 44,527,167       | 3,261,067      | 3,261,067       | 3,261,067      | 3,261,067       | 3,261,067      | 3,261,067       | 3,261,067      | 3,261,067       |
| E1B113     | EIF581        | ABCCL1    | Uncharacterized protein | ABC transporter-like                                                           | 10,380,700      | 10,380,700       | 10,380,700      | 10,380,700       | 10,380,700      | 10,380,700       | 16,558,511     | 16,558,511      | 16,558,511     | 16,558,511      | 16,558,511     | 16,558,511      | 16,558,511     | 16,558,511      |
| E1B114     | EIF582        | PTPRN     | Uncharacterized protein | Receptor-type tyrosine-protein phosphatase-like N                              | 12,664,033      | 12,664,033       | 12,664,033      | 12,664,033       | 12,664,033      | 12,664,033       | 216,183        | 216,183         | 216,183        | 216,183         | 216,183        | 216,183         | 216,183        | 216,183         |
| E1B115     | EIF583        | APOL1     | Uncharacterized protein | Apolipoprotein A-1                                                             | 15,747,789      | 16,884,667       | 15,747,789      | 16,884,667       | 15,747,789      | 16,884,667       | 20,862,300     | 20,862,300      | 20,862,300     | 20,862,300      | 20,862,300     | 20,862,300      | 20,862,300     | 20,862,300      |
| E1B116     | EIF584        | VPS35     | Uncharacterized protein | Vacuolar protein sorting-associated protein 35                                 | 6,674,815       | 6,674,815        | 6,674,815       | 6,674,815        | 6,674,815       | 6,674,815        | 14,967,306     | 14,967,306      | 14,967,306     | 14,967,306      | 14,967,306     | 14,967,306      | 14,967,306     | 14,967,306      |
| E1B117     | EIF585        | HPSG      | Uncharacterized protein | Alpha-2-HS-glycoprotein                                                        | 24,758,827      | 27,448,186       | 24,758,827      | 27,448,186       | 24,758,827      | 27,448,186       | 907,504        | 907,504         | 907,504        | 907,504         | 907,504        | 907,504         | 907,504        | 907,504         |
| E1B118     | EIF586        | CSRP1     | Uncharacterized protein | Collagen alpha-1(V) chain                                                      | 11,817,688      | 11,817,688       | 11,817,688      | 11,817,688       | 11,817,688      | 11,817,688       | 1,080,471      | 1,080,471       | 1,080,471      | 1,080,471       | 1,080,471      | 1,080,471       | 1,080,471      | 1,080,471       |
| E1B119     | EIF587        | ATAT1     | Uncharacterized protein | Alpha-tubulin N-acetyltransferase                                              | 17,344,813      | 17,344,813       | 17,344,813      | 17,344,813       | 17,344,813      | 17,344,813       | 13,261,277     | 13,261,277      | 13,261,277     | 13,261,277      | 13,261,277     | 13,261,277      | 13,261,277     | 13,261,277      |
| E1B120     | EIF588        | ATF1      | Uncharacterized protein | Activator protein 1                                                            | 11,836,000      | 11,836,000       | 11,836,000      | 11,836,000       | 11,836,000      | 11,836,000       | 875,238        | 875,238         | 875,238        | 875,238         | 875,238        | 875,238         | 875,238        | 875,238         |
| E1B121     | EIF589        | CAS1      | Uncharacterized protein | Alpha-S1-casein                                                                | 18,695,400      | 18,695,400       | 18,695,400      | 18,695,400       | 18,695,400      | 18,695,400       | 5,465,815      | 5,465,815       | 5,465,815      | 5,465,815       | 5,465,815      | 5,465,815       | 5,465,815      | 5,465,815       |
| E1B122     | EIF590        | PKRAG1    | Uncharacterized protein | 5'-AMP-activated protein kinase subunit gamma                                  | 13,329,767      | 13,329,767       | 13,329,767      | 13,329,767       | 13,329,767      | 13,329,767       | 2,078,101      | 2,078,101       | 2,078,101      | 2,078,101       | 2,078,101      | 2,078,101       | 2,078,101      | 2,078,101       |
| E1B123     | EIF591        | COL12     | Uncharacterized protein | Collagen-12                                                                    | 11,938,133      | 11,938,133       | 11,938,133      | 11,938,133       | 11,938,133      | 11,938,133       | 1,299,572      | 1,299,572       | 1,299,572      | 1,299,572       | 1,299,572      | 1,299,572       | 1,299,572      | 1,299,572       |
| E1B124     | EIF592        | ADAMTS16  | Uncharacterized protein | ADAMTS-16                                                                      | 6,899,695       | 6,899,695        | 6,899,695       | 6,899,695        | 6,899,695       | 6,899,695        | 150,646        | 150,646         | 150,646        | 150,646         | 150,646        | 150,646         | 150,646        | 150,646         |
| E1B125     | EIF593        | RGS3      | Uncharacterized protein | Regulator of G-protein signaling 3                                             | 19,676,667      | 19,676,667       | 19,676,667      | 19,676,667       | 19,676,667      | 19,676,667       | 7,086,558      | 7,086,558       | 7,086,558      | 7,086,558       | 7,086,558      | 7,086,558       | 7,086,558      | 7,086,558       |
| E1B126     | EIF594        | WCI1      | Uncharacterized protein | Tetratricopeptide repeat protein 13                                            | 47,126,637      | 47,126,637       | 47,126,637      | 47,126,637       | 47,126,637      | 47,126,637       | 32,877,096     | 32,877,096      | 32,877,096     | 32,877,096      | 32,877,096     | 32,877,096      | 32,877,096     | 32,877,096      |
| E1B127     | EIF595        | AP0A2     | Uncharacterized protein | Apolipoprotein A-II                                                            | 18,727,535      | 18,727,535       | 18,727,535      | 18,727,535       | 18,727,535      | 18,727,535       | 5,455,191      | 5,455,191       | 5,455,191      | 5,455,191       | 5,455,191      | 5,455,191       | 5,455,191      | 5,455,191       |
| E1B128     | EIF596        | AGL       | Uncharacterized protein | Glycogen branching enzyme                                                      | 11,502,959      | 11,502,959       | 11,502,959      | 11,502,959       | 11,502,959      | 11,502,959       | 9,924,531      | 9,924,531       | 9,924,531      | 9,924,531       | 9,924,531      | 9,924,531       | 9,924,531      | 9,924,531       |
| E1B129     | EIF597        | GNCT4     | Uncharacterized protein | Beta-1,3-galactosyl-O-glycosyl-glycoprotein beta-1,6-N-acetylglucosaminidase 4 | 15,023,782      | 15,023,782       | 15,023,782      | 15,023,782       | 15,023,782      | 15,023,782       | 9,650,800      | 9,650,800       | 9,650,800      | 9,650,800       | 9,650,800      | 9,650,800       | 9,650,800      | 9,650,800       |
| E1B130     | EIF598        | PLCE1     | Uncharacterized protein | 1-phosphatidylinositol-4,5-bisphosphate phosphodiesterase 1                    | 7,943,172       | 7,943,172        | 7,943,172       | 7,943,172        | 7,943,172       | 7,943,172        | 1,883,369      | 1,883,369       | 1,883,369      | 1,883,369       | 1,883,369      | 1,883,369       | 1,883,369      | 1,883,369       |
| E1B131     | EIF599        | HBG       | Uncharacterized protein | Hemoglobin fetal subunit beta                                                  | 13,805,644      | 13,805,644       | 13,805,644      | 13,805,644       | 13,805,644      | 13,805,644       | 1,524,699      | 1,524,699       | 1,524,699      | 1,524,699       | 1,524,699      | 1,524,699       | 1,524,699      | 1,524,699       |
| E1B132     | EIF600        | SLAMF1    | Uncharacterized protein | SLAMF1 family member 9                                                         | 13,790,700      | 13,790,700       | 13,790,700      | 13,790,700       | 13,790,700      | 13,790,700       | 8,685,600      | 8,685,600       | 8,685,600      | 8,685,600       | 8,685,600      | 8,685,600       | 8,685,600      | 8,685,600       |
| E1B133     | EIF601        | TKB1      | Uncharacterized protein | TANK-binding kinase-1-binding protein 1                                        | 10,212,644      | 10,212,644       | 10,212,644      | 10,212,644       | 10,212,644      | 10,212,644       | 217,183        | 217,183         | 217,183        | 217,183         | 217,183        | 217,183         | 217,183        | 217,183         |
| E1B134     | EIF602        | MKI67     | Uncharacterized protein | MKI67 FHA domain-interacting nucleolar phosphoprotein                          | 16,995,502      | 16,995,502       | 16,995,502      | 16,995,502       | 16,995,502      | 16,995,502       | 7,102,260      | 7,102,260       | 7,102,260      | 7,102,260       | 7,102,260      | 7,102,260       | 7,102,260      | 7,102,260       |
| E1B135     | EIF603        | BSN       | Uncharacterized protein | Protein bassoon                                                                | 7,872,799       | 7,872,799        | 7,872,799       | 7,872,799        | 7,872,799       | 7,872,799        | 6,282,199      | 6,282,199       | 6,282,199      | 6,282,199       | 6,282,199      | 6,282,199       | 6,282,199      | 6,282,199       |
| E1B136     | EIF604        | RPTN      | Uncharacterized protein | Reptin                                                                         | 7,404,333       | 7,404,333        | 7,404,333       | 7,404,333        | 7,404,333       | 7,404,333        | 1,369,385      | 1,369,385       | 1,369,385      | 1,369,385       | 1,369,385      | 1,369,385       | 1,369,385      | 1,369,385       |
| E1B137     | EIF605        | DOCK4     | Uncharacterized protein | Dedicator of cytokinesis protein 4                                             | 8,176,516       | 8,176,516        | 8,176,516       | 8,176,516        | 8,176,516       | 8,176,516        | 4,338,157      | 4,338,157       | 4,338,157      | 4,338,157       | 4,338,157      | 4,338,157       | 4,338,157      | 4,338,157       |
| E1B138     | EIF606        | USP24     | Uncharacterized protein | Ubiquitin carboxyl-terminal hydrolase 34                                       | 7,858,621       | 7,858,621        | 7,858,621       | 7,858,621        | 7,858,621       | 7,858,621        | 1,025,197      | 1,025,197       | 1,025,197      | 1,025,197       | 1,025,197      | 1,025,197       | 1,025,197      | 1,025,197       |
| E1B139     | EIF607        | POGRL     | Uncharacterized protein | Platelet-derived growth factor receptor-like protein                           | 8,632,700       | 8,632,700        | 8,632,700       | 8,632,700        | 8,632,700       | 8,632,700        | 8,029,570      | 8,029,570       | 8,029,570      | 8,029,570       | 8,029,570      | 8,029,570       | 8,029,570      | 8,029,570       |
| E1B140     | EIF608        | SPB1      | Uncharacterized protein | Spectrin beta chain, brain 1                                                   | 6,527,751       | 6,527,751        | 6,527,751       | 6,527,751        | 6,527,751       | 6,527,751        | 150,646        | 150,646         | 150,646        | 150,646         | 150,646        | 150,646         | 150,646        | 150,646         |
| E1B141     | EIF609        | PRK2      | Uncharacterized protein | Receptor-type tyrosine-protein phosphatase zeta                                | 5,187,597       | 5,187,597        | 5,187,597       | 5,187,597        | 5,187,597       | 5,187,597        | 389,093        | 389,093         | 389,093        | 389,093         | 389,093        | 389,093         | 389,093        | 389,093         |
| E1B142     | EIF610        | FNC1      | Uncharacterized protein | Fingercin                                                                      | 4,548,500       | 4,548,500        | 4,548,500       | 4,548,500        | 4,548,500       | 4,548,500        | 583,682        | 583,682         | 583,682        | 583,682         | 583,682        | 583,682         | 583,682        | 583,682         |
| E1B143     | EIF611        | ZYX       | Uncharacterized protein | Zinc finger MYM-type protein 2                                                 | 5,059,770       | 5,059,770        | 5,059,770       | 5,059,770        | 5,059,770       | 5,059,770        | 205,615        | 205,615         | 205,615        | 205,615         | 205,615        | 205,615         | 205,615        | 205,615         |
| E1B144     | EIF612        | MYO2      | Uncharacterized protein | Myosin IIa                                                                     | 14,880,200      | 14,880,200       | 14,880,200      | 14,880,200       | 14,880,200      | 14,880,200       | 6,542,524      | 6,542,524       | 6,542,524      | 6,542,524       | 6,542,524      | 6,542,524       | 6,542,524      | 6,542,524       |
| E1B145     | EIF613        | KLH12     | Uncharacterized protein | Kelch domain-containing protein 12                                             | 8,305,850       | 8,305,850        | 8,305,850       | 8,305,850        | 8,305,850       | 8,305,850        | 1,172,925      | 1,172,925       | 1,172,925      | 1,172,925       | 1,172,925      | 1,172,925       | 1,172,925      | 1,172,925       |
| E1B146     | EIF614        | NR11      | Uncharacterized protein | Neuronal cell adhesion molecule 11                                             | 6,632,760       | 6,632,760        | 6,632,760       | 6,632,760        | 6,632,760       | 6,632,760        | 346,384        | 346,384         | 346,384        | 346,384         | 346,384        | 346,384         | 346,384        | 346,384         |
| E1B147     | EIF615        | NEB       | Uncharacterized protein | Nebulin                                                                        | 8,215,372       | 8,215,372        | 8,215,372       | 8,215,372        | 8,215,372       | 8,215,372        | 1,246,353      | 1,246,353       | 1,246,353      | 1,246,353       | 1,246,353      | 1,246,353       | 1,246,353      | 1,246,353       |
| E1B148     | EIF616        | FLG2      | Uncharacterized protein | F                                                                              |                 |                  |                 |                  |                 |                  |                |                 |                |                 |                |                 |                |                 |



|        |        |              |           |                                                        |                                                                              |            |   |   |            |           |         |            |   |   |   |         |        |        |            |           |   |        |   |           |           |           |         |
|--------|--------|--------------|-----------|--------------------------------------------------------|------------------------------------------------------------------------------|------------|---|---|------------|-----------|---------|------------|---|---|---|---------|--------|--------|------------|-----------|---|--------|---|-----------|-----------|-----------|---------|
| G3MX8  | Q37D4  | GMXX8_BOVIN  | SCRT1     | Uncharacterized protein                                | Transcriptional repressor scratch 1                                          | -          | - | - | -          | 839,686   | -       | -          | - | - | - | 743,967 | -      | -      | 242,300    | -         | - | -      | - | 147,654   |           |           |         |
| F1MC1  | F1MC1  | TERT_BOVIN   | TERT      | Telomerase reverse transcriptase                       | Telomerase reverse transcriptase                                             | 461,260    | - | - | -          | 889,754   | -       | -          | - | - | - | 701,099 | -      | -      | 36,778     | -         | - | -      | - | 69,795    |           |           |         |
| F1M11  | F1M11  | FM11_BOVIN   | Bi-91072  | Uncharacterized protein                                | Keratin, type I cytoskeletal 14                                              | 887,338    | - | - | -          | 889,754   | 778,992 | 777,113    | - | - | - | 681,963 | 81,737 | 86,222 | 148,965    | -         | - | 46,961 | - | 67,174    | 42,209    |           |         |
| AKN19  | FAM83D | FAM83D_BOVIN | FAM83D    | Protein FAM83D                                         | Protein FAM83D                                                               | 696,184    | - | - | -          | -         | -       | -          | - | - | - | 563,884 | -      | -      | 148,566    | -         | - | -      | - | 172,978   |           |           |         |
| F1M3D4 | F1M3D4 | F1M3D4_BOVIN | F1M3D4    | Uncharacterized protein                                | Collagen alpha-6(VI) chain                                                   | 67,331,556 | - | - | 21,690,563 | -         | -       | -          | - | - | - | -       | -      | -      | 10,091,824 | -         | - | -      | - | -         |           |           |         |
| ELBNC2 | ELBNC2 | ELBNC2_BOVIN | KCTD3     | Uncharacterized protein                                | BTF/POZ domain-containing protein KCTD3                                      | 20,861,151 | - | - | 2,885,823  | -         | -       | -          | - | - | - | -       | -      | -      | 496,500    | -         | - | -      | - | -         |           |           |         |
| PO1966 | PO1966 | HBA_BOVIN    | HBA       | Hemoglobin subunit alpha                               | Hemoglobin subunit alpha                                                     | 20,365,677 | - | - | 16,449,018 | -         | -       | 15,433,363 | - | - | - | -       | -      | -      | 865,453    | -         | - | -      | - | 3,322,560 | 566,958   |           |         |
| G3N1C8 | G3N1C8 | G3N1C8_BOVIN | DNAH1     | Uncharacterized protein                                | Dynein heavy chain 1, axonemal                                               | 20,713,359 | - | - | 6,383,105  | 4,804,137 | -       | -          | - | - | - | -       | -      | -      | 15,072,461 | -         | - | -      | - | 1,273,318 | 248,688   |           |         |
| ELBMR3 | ELBMR3 | ELBMR3_BOVIN | FAM179B   | Uncharacterized protein                                | Protein FAM179B                                                              | 17,139,033 | - | - | 12,058,433 | -         | -       | -          | - | - | - | -       | -      | -      | 3,531,412  | -         | - | -      | - | 3,407,457 | -         |           |         |
| ELBPS1 | ELBPS1 | ELBPS1_BOVIN | BRP1      | Uncharacterized protein                                | Peregryn                                                                     | 16,891,833 | - | - | -          | -         | -       | 15,006,484 | - | - | - | -       | -      | -      | 2,353,141  | -         | - | -      | - | -         | 2,113,695 |           |         |
| F1N1N9 | F1N1N9 | BOVIN        | HERC5     | Uncharacterized protein                                | E3, UBR5-like protein ligase HERC5                                           | 13,774,733 | - | - | 7,219,300  | -         | -       | -          | - | - | - | -       | -      | -      | 6,095,343  | -         | - | -      | - | -         | 1,775,958 |           |         |
| ELBHR2 | ELBHR2 | ELBHR2_BOVIN | KLAA0232  | Uncharacterized protein                                | KLAA0232                                                                     | 12,370,053 | - | - | 7,152,660  | -         | -       | 5,137,792  | - | - | - | -       | -      | -      | 4,908,107  | -         | - | -      | - | -         | 1,466,208 |           |         |
| G3MX0  | G3MX0  | GLUCOSYLLASE | OC631152  | Solute carrier family 5 (Sodium/glucose cotransporter) | Solute carrier family 5 (Sodium/glucose cotransporter)                       | 10,709,533 | - | - | -          | -         | -       | -          | - | - | - | -       | -      | -      | 905,575    | -         | - | -      | - | -         | -         |           |         |
| ELB7V9 | ELB7V9 | ELB7V9_BOVIN | MAGI1     | Uncharacterized protein                                | Membrane-associated guanylate kinase, WW and PDZ domain-containing protein 1 | 9,468,467  | - | - | 7,651,500  | -         | -       | -          | - | - | - | -       | -      | -      | 2,790,045  | -         | - | -      | - | 757,701   | -         |           |         |
| F0K33  | F0K33  | BOVIN        | LOC782087 | Uncharacterized protein                                | UPP085 transmembrane protein C17orf28, isoform 2                             | 7,839,433  | - | - | 6,867,893  | -         | -       | -          | - | - | - | -       | -      | -      | 436,394    | -         | - | -      | - | 420,421   | -         |           |         |
| ELBMP8 | ELBMP8 | ELBMP8_BOVIN | SRN1      | Uncharacterized protein                                | Protein strawberry notch homolog 1                                           | 7,447,725  | - | - | 5,773,534  | -         | -       | -          | - | - | - | -       | -      | -      | 3,258,827  | -         | - | -      | - | 1,307,708 | -         |           |         |
| ELBCZ9 | ELBCZ9 | BOVIN        | ADNP      | Uncharacterized protein                                | ADNP homeobox protein 2                                                      | 6,940,550  | - | - | -          | -         | -       | -          | - | - | - | -       | -      | -      | 359,450    | -         | - | -      | - | -         | -         |           |         |
| F1MW2  | F1MW2  | BOVIN        | CAMISAP1  | Uncharacterized protein                                | Calcmodulin-regulated spectrin-associated protein 1                          | 6,749,457  | - | - | 6,998,361  | -         | -       | -          | - | - | - | -       | -      | -      | 375,874    | -         | - | -      | - | -         | 632,104   |           |         |
| ELBKN0 | ELBKN0 | ELBKN0_BOVIN | MIL4      | Uncharacterized protein                                | Histone-lysine N-methyltransferase MIL4                                      | 6,457,227  | - | - | 3,163,658  | -         | -       | 2,606,139  | - | - | - | -       | -      | -      | 638,652    | -         | - | -      | - | -         | 549,979   |           |         |
| ELB7D7 | ELB7D7 | BOVIN        | ZFH2      | Uncharacterized protein                                | Zinc finger homeobox protein 2                                               | 6,359,200  | - | - | 3,342,150  | -         | -       | -          | - | - | - | -       | -      | -      | 1,030,911  | -         | - | -      | - | -         | 104,413   |           |         |
| F1M50  | F1M50  | BOVIN        | SLC35E1   | Uncharacterized protein                                | Solute carrier family 35 member E1                                           | 6,266,618  | - | - | -          | -         | -       | -          | - | - | - | -       | -      | -      | 84,648     | -         | - | -      | - | -         | 84,648    |           |         |
| ELB6K6 | ELB6K6 | BOVIN        | BAZ1B     | Uncharacterized protein                                | Tyrosine-protein kinase BAZ1B                                                | 5,971,733  | - | - | -          | -         | -       | 5,275,633  | - | - | - | -       | -      | -      | 623,546    | -         | - | -      | - | -         | 729,308   |           |         |
| F1MEV0 | F1MEV0 | BOVIN        | SG5W1     | Uncharacterized protein                                | Small G protein signaling modulator 1                                        | 5,638,933  | - | - | 4,355,533  | -         | -       | -          | - | - | - | -       | -      | -      | 703,898    | -         | - | -      | - | -         | 438,720   |           |         |
| F1MG68 | F1MG68 | BOVIN        | IR54      | Uncharacterized protein                                | Insulin receptor substrate 4                                                 | 5,603,668  | - | - | 3,597,700  | -         | -       | -          | - | - | - | -       | -      | -      | 1,079,487  | -         | - | -      | - | -         | -         |           |         |
| ELBMP6 | ELBMP6 | BOVIN        | NAAL16    | Uncharacterized protein                                | N-alpha-acetyltransferase 16, NaAa auxiliary subunit                         | 5,300,167  | - | - | 3,922,933  | -         | -       | -          | - | - | - | -       | -      | -      | 366,500    | -         | - | -      | - | -         | 559,034   |           |         |
| F1MP74 | F1MP74 | BOVIN        | SDQ2      | Uncharacterized protein                                | Protein sidelielc2                                                           | 5,200,767  | - | - | 4,905,700  | -         | -       | -          | - | - | - | -       | -      | -      | 1,049,890  | -         | - | -      | - | -         | 1,049,890 |           |         |
| G5ESW1 | G5ESW1 | BOVIN        | F8        | Uncharacterized protein                                | Coagulation factor VIII                                                      | 4,672,178  | - | - | -          | -         | -       | 4,087,215  | - | - | - | -       | -      | -      | 147,301    | -         | - | -      | - | -         | 638,140   |           |         |
| ELB6Z7 | ELB6Z7 | BOVIN        | TIL7      | Uncharacterized protein                                | Tubulin poly(ADP-ribose) polymerase 1                                        | 4,406,971  | - | - | -          | -         | -       | -          | - | - | - | -       | -      | -      | 390,823    | -         | - | -      | - | -         | 174,085   |           |         |
| F1M1K2 | F1M1K2 | BOVIN        | ME23A     | Uncharacterized protein                                | Mediator of RNA polymerase II transcription subunit 24                       | 4,392,167  | - | - | 4,278,844  | -         | -       | -          | - | - | - | -       | -      | -      | 995,229    | -         | - | -      | - | -         | 1,072,703 |           |         |
| F1M1L1 | F1M1L1 | BOVIN        | MED13L    | Uncharacterized protein                                | Mediator of RNA polymerase II transcription subunit 13                       | 4,291,867  | - | - | 3,403,116  | -         | -       | 3,695,364  | - | - | - | -       | -      | -      | 55,971     | -         | - | -      | - | -         | 472,529   | 737,147   |         |
| F1MPT5 | F1MPT5 | BOVIN        | DST       | Uncharacterized protein                                | Dystonin                                                                     | 3,863,367  | - | - | -          | -         | -       | -          | - | - | - | -       | -      | -      | 451,654    | -         | - | -      | - | -         | -         |           |         |
| ELBCH1 | ELBCH1 | BOVIN        | MARBP1    | Uncharacterized protein                                | Mitogen-activated protein kinase-binding protein 1                           | 3,596,003  | - | - | 3,616,338  | -         | -       | -          | - | - | - | -       | -      | -      | 144,181    | -         | - | -      | - | -         | -         | 312,267   |         |
| F1M06  | F1M06  | BOVIN        | COL3A3    | Uncharacterized protein                                | Collagen alpha-3(I) chain                                                    | 3,212,744  | - | - | 2,164,573  | -         | -       | -          | - | - | - | -       | -      | -      | 76,912     | -         | - | -      | - | -         | -         | 317,676   |         |
| G3MW2  | G3MW2  | BOVIN        | TET1      | Uncharacterized protein                                | Methylcrotonoyl-dioxygenase TET1                                             | 3,205,723  | - | - | 2,369,600  | -         | -       | -          | - | - | - | -       | -      | -      | 3,147,485  | -         | - | -      | - | -         | -         | 2,456,662 |         |
| F1MD64 | F1MD64 | BOVIN        | FAM38A    | Uncharacterized protein                                | Pleio-type 1 chaperonin-like protein 1                                       | 3,147,485  | - | - | 2,433,210  | -         | -       | 1,413,331  | - | - | - | -       | -      | -      | 374,332    | -         | - | -      | - | -         | -         | 374,332   |         |
| F1M80  | F1M80  | BOVIN        | METT3     | Uncharacterized protein                                | N6-adenosine-methyltransferase 70kDa subunit                                 | 2,857,563  | - | - | 1,834,618  | -         | -       | -          | - | - | - | -       | -      | -      | 390,971    | -         | - | -      | - | -         | -         | 949,099   |         |
| ELBNU1 | ELBNU1 | BOVIN        | STB1      | Uncharacterized protein                                | Stabilin-1                                                                   | 2,451,507  | - | - | -          | -         | -       | -          | - | - | - | -       | -      | -      | 57,648     | -         | - | -      | - | -         | -         | 145,164   |         |
| Q02811 | Q02811 | PKKA_BOVIN   | PKKA      | Phosphatidylinositol 4-kinase alpha                    | Phosphatidylinositol 4-kinase alpha                                          | 2,428,667  | - | - | 2,069,660  | -         | -       | -          | - | - | - | -       | -      | -      | 375,193    | -         | - | -      | - | -         | 103,344   |           |         |
| F1M121 | F1M121 | BOVIN        | CAPN12    | Uncharacterized protein                                | Capnain-12                                                                   | 2,375,090  | - | - | -          | -         | -       | 1,932,069  | - | - | - | -       | -      | -      | 542,999    | -         | - | -      | - | -         | -         | 694,810   |         |
| Q17R02 | Q17R02 | BOVIN        | WH5CLL1   | Wolf-Hirschhorn syndrome candidate 1                   | Wolf-Hirschhorn syndrome candidate 1                                         | 2,331,225  | - | - | 3,173,418  | -         | -       | -          | - | - | - | -       | -      | -      | 370,652    | -         | - | -      | - | -         | -         | 536,224   |         |
| ELBPS4 | ELBPS4 | BOVIN        | RH1A1244  | Uncharacterized protein                                | BrefeldinA-inhibited guanine nucleotide-exchange protein 1                   | 1,750,005  | - | - | -          | -         | -       | -          | - | - | - | -       | -      | -      | 263,490    | -         | - | -      | - | -         | -         | 263,490   |         |
| F1MT60 | F1MT60 | BOVIN        | NEB       | Uncharacterized protein                                | Nebulin                                                                      | 1,699,569  | - | - | -          | -         | -       | 1,397,459  | - | - | - | -       | -      | -      | 281,179    | -         | - | -      | - | -         | -         | 300,960   |         |
| PO1030 | PO1030 | CO4_BOVIN    | C4        | Complement C4                                          | Complement C4                                                                | 1,598,293  | - | - | 1,633,119  | -         | -       | -          | - | - | - | -       | -      | 33,247 | -          | -         | - | -      | - | -         | 23,365    |           |         |
| A4HFK4 | A4HFK4 | BOVIN        | SNRPD2    | Uncharacterized protein                                | Synactopodin-2                                                               | 9,814,833  | - | - | 12,187,533 | -         | -       | -          | - | - | - | -       | -      | -      | 334,965    | -         | - | -      | - | -         | -         | 667,083   |         |
| A6HW9  | A6HW9  | BOVIN        | SUD3      | Snr3 histone deacetylase corepressor complex component | Snr3 histone deacetylase corepressor complex component                       | 4,328,467  | - | - | -          | -         | -       | 4,609,014  | - | - | - | -       | -      | -      | -          | 327,052   | - | -      | - | -         | -         | 1,172,884 |         |
| A6L0R2 | A6L0R2 | BOVIN        | LARS      | Leucine-tRNA ligase, cytoplasmic                       | Leucine-tRNA ligase, cytoplasmic                                             | -          | - | - | -          | -         | -       | -          | - | - | - | -       | -      | -      | -          | -         | - | -      | - | -         | -         | 173,384   |         |
| AGP52  | AGP52  | BOVIN        | SMTN      | SMTN protein                                           | SMTN protein                                                                 | -          | - | - | -          | -         | -       | 5,745,756  | - | - | - | -       | -      | -      | -          | -         | - | -      | - | -         | -         | 4,015,270 |         |
| AGP9M5 | AGP9M5 | BOVIN        | LDZ2      | LDZ2 protein                                           | Limingoglobulin-like domain-containing receptor 2                            | 3,381,448  | - | - | -          | -         | -       | 3,285,204  | - | - | - | -       | -      | -      | 389,857    | -         | - | -      | - | -         | -         | 608,497   |         |
| A7F500 | A7F500 | RHDG7_BOVIN  | DIC1      | Rho GTPase-activating protein 7                        | Rho GTPase-activating protein 7                                              | 1,884,760  | - | - | 1,426,675  | -         | -       | -          | - | - | - | -       | -      | -      | 328,857    | -         | - | -      | - | -         | -         | 249,348   |         |
| ELB753 | ELB753 | BOVIN        | EP4L3     | Uncharacterized protein                                | Band 4.1-like protein 3                                                      | 1,981,975  | - | - | 1,777,986  | -         | -       | -          | - | - | - | -       | -      | -      | 45,443     | -         | - | -      | - | -         | -         | 212,280   |         |
| ELB805 | ELB805 | BOVIN        | C3        | Uncharacterized protein                                | Complement C3                                                                | 3,050,566  | - | - | 2,829,296  | -         | -       | -          | - | - | - | -       | -      | -      | 553,106    | -         | - | -      | - | -         | -         | 787,009   |         |
| ELB842 | ELB842 | BOVIN        | HIVEP2    | Uncharacterized protein                                | Transcription factor HIVEP2                                                  | 6,793,067  | - | - | -          | -         | -       | 13,682,707 | - | - | - | -       | -      | -      | -          | 1,053,876 | - | -      | - | -         | -         | -         | 857,651 |
| ELB846 | ELB846 | BOVIN        | Br-65579  | Uncharacterized protein                                | Pseudopodium-enriched atypical kinase 1                                      | 6,793,067  | - | - | -          | -         | -       | -          | - | - | - | -       | -      | -      | 74,009     | -         | - | -      | - | -         | -         | 405,282   |         |
| ELB886 | ELB886 | BOVIN        | NO53      | Nitric oxide synthase                                  | Nitric oxide synthase                                                        | 513,657    | - | - | -          | -         | -       | 553,358    | - | - | - | -       | -      | -      | 74,009     | -         | - | -      | - | -         | -         | 74,009    |         |
| ELB925 | ELB925 | BOVIN        | ARID1A    | Uncharacterized protein                                | AT-rich interactive domain-containing protein 1A                             | 4,956,500  | - | - | 4,218,133  | -         | -       | -</        |   |   |   |         |        |        |            |           |   |        |   |           |           |           |         |





### Supporting Information Table 3. FBS-DMEM Culture Media- Quantification and Identification of all proteins.

| Protein ID | Protein Entry | Gene Name  | Protein Name                                                         | Protein Probability | Protein Coverage (%) | Peptide Sequence                                     | Peptide Charge | Peptide Probability | Mean Abundance | SEM       |
|------------|---------------|------------|----------------------------------------------------------------------|---------------------|----------------------|------------------------------------------------------|----------------|---------------------|----------------|-----------|
| A0JN62     | CE120_BOVIN   | CEP120     | Centrosomal protein of 120 kDa                                       | 0.999               | 1.9                  |                                                      |                |                     | 248,987        | 16,730    |
| A0JN62-2   | CE120_BOVIN   | CEP120     | Isoform 2 of Centrosomal protein of 120 kDa                          | 0.999               | 2.0                  |                                                      |                |                     | 248,987        | 16,730    |
| A0JN96     | A0JN96_BOVIN  | STK3       | Serine/threonine kinase 3 (STE20 homolog, yeast)                     | 1.000               | 3.9                  | PVTVEGAFITLPPNRAKQK                                  | 3              | 0.999               | 792,006        | 59,747    |
| A0JNA3     | A0JNA3_BOVIN  | IMPDH1     | Inosine-5'-monophosphate dehydrogenase                               | 0.999               | 3.3                  | NKSHENCNQNMEHPFMSK                                   | 3              | 0.999               | 782,446        | 180,413   |
| A0JNB1     | ZN227_BOVIN   | ZNF227     | Zinc finger protein 227                                              | 0.999               | 1.5                  | TMSAQIEGGVHGLHSYEKR                                  | 3              | 0.999               | 1,927,763      | 167,570   |
| Q95L39     | LOXL1_BOVIN   | LOXL1      | Lysyl oxidase homolog 1                                              | 1.000               | 1.7                  | GFNSHNSPLICHR                                        | 3              | 0.999               | 1,402,146      | 185,162   |
| A0JNB6     | A0JNB6_BOVIN  | LOXL1      | Lysyl oxidase-like 1                                                 | 1.000               | 1.7                  | GFNSHNSPLICHR                                        | 3              | 0.999               | 1,402,146      | 185,162   |
| A0JNC0     | TMOD1_BOVIN   | TMOD1      | Tropomodulin-1                                                       | 0.999               | 13.4                 | TYDQGVYYR                                            | 3              | 0.999               | 2,592,644      | 171,387   |
| G1K1R3     | G1K1R3_BOVIN  | TMOD1      | Uncharacterized protein                                              | 0.999               | 13.4                 |                                                      |                |                     | 2,592,644      | 171,387   |
| A0JNE6     | A0JNE6_BOVIN  | EIF2AK2    | Eukaryotic translation initiation factor 2-alpha kinase              | 0.999               | 4.7                  | PTQYKFPVDEEPNATDVEETLERIK<br>TLENELDELDPDNALLPAGLRQK | 3              | 0.999               | 3,578,021      | 485,586   |
| A0JNF4     | A0JNF4_BOVIN  | PRIM2      | Primase, DNA, polypeptide 2 (58kDa)                                  | 0.999               | 3.6                  | LFNDFTEVTPIGSGGGFQGVFKAKHR                           | 3              | 0.999               | 2,255,075      | 235,288   |
| A0JNF9     | A0JNF9_BOVIN  | STAP1      | Signal transducing adaptor family member 1                           | 0.999               | 10.4                 | IILTNTPGQGDYHGCPFR                                   | 3              | 0.999               | 1,510,675      | 310,880   |
| A0JNH1     | K1Z_BOVIN     | PLK1S1     | Centrosomal protein kizuna                                           | 0.999               | 2.6                  | VMSAGKNVITDELKPVTLNPLFSDVYFK                         | 3              | 0.999               | 3,169,388      | 713,917   |
| A0JNH7     | A0JNH7_BOVIN  | PRKCZ      | Protein kinase C, zeta                                               | 0.999               | 4.7                  | SSCSLSPSTPDESIGRNGK                                  | 3              | 0.999               | 3,719,000      | 322,288   |
| A0JNK9     | A0JNK9_BOVIN  | STEAP2     | Six transmembrane epithelial antigen of the prostate                 | 0.999               | 5.9                  | PVIDMGDGIKISQGLQDLDLRVIGR                            | 3              | 0.999               | 1,723,173      | 497,347   |
| A0RZB4     | SPRN_BOVIN    | SPRN       | Shadow of prion protein                                              | 0.999               | 12.6                 | AFEEEEYRFYTPPNFVLLVLPVILGK                           | 3              | 0.999               | 3,383,346      | 1,151,739 |
| F1MCU1     | F1MCU1_BOVIN  | Bl.2644    | Uncharacterized protein (Fragment)                                   | 0.999               | 2.4                  | GVYSYVAWWTSGTGPTGHR                                  | 3              | 0.999               | 1,086,179      | 126,039   |
| A1A4H6     | DDX27_BOVIN   | DDX27      | Probable ATP-dependent RNA helicase DDX27                            | 0.999               | 2.5                  |                                                      |                |                     | 1,086,179      | 126,039   |
| A1A4J8     | SCO1_BOVIN    | SCO1       | Protein SCO1 homolog, mitochondria                                   | 0.999               | 7.9                  | SQEALRAAPDILIATPGR                                   | 3              | 0.999               | 1,805,918      | 241,992   |
| A1A4J9     | A1A4J9_BOVIN  | DNAJA3     | DnaJ (Hsp40) homolog, subfamily A, member 3                          | 0.999               | 4.0                  | PGPVSWKSLAVTFAIGGALLAGMK                             | 3              | 0.999               | 8,393,145      | 454,341   |
| A1A4K8     | U2AF1_BOVIN   | U2AF1      | Splicing factor U2AF 35 kDa subunit                                  | 0.999               | 10.1                 | KKVIVPAGVEDGQTVR                                     | 3              | 0.999               | 1,154,508      | 167,017   |
| E1BDJ5     | E1BDJ5_BOVIN  | Bt.64822   | Uncharacterized protein                                              | 0.999               | 3.7                  | EACCRQYEMGECTRGFCFMHLK                               | 3              | 0.999               | 845,593        | 126,382   |
| F1MGQ9     | F1MGQ9_BOVIN  | Bt.64822   | Uncharacterized protein                                              | 0.999               | 3.7                  |                                                      |                |                     | 845,593        | 126,382   |
| A1A4L4     | F188B_BOVIN   | FAM188B    | Protein FAM188B                                                      | 0.999               | 3.7                  |                                                      |                |                     | 845,593        | 126,382   |
| A1A4N2     | A1A4N2_BOVIN  | BTBD6      | BTBD6 protein                                                        | 0.999               | 5.4                  | KNLQSVSNKLEGLDLDLQLEDVEDELR                          | 3              | 0.999               | 3,074,756      | 624,270   |
| A1A4R0     | A1A4R0_BOVIN  | BGLAP      | BGLAP protein                                                        | 0.999               | 14.5                 | YVLAVGSSVYVAMIFYGLAEVK                               | 3              | 0.999               | 1,587,415      | 209,097   |
| P02820     | OSTCN_BOVIN   | BGLAP      | Osteocalcin                                                          | 0.999               | 19.0                 |                                                      |                |                     | 1,587,415      | 209,097   |
| A1L520     | ARFG2_BOVIN   | ARFGAP2    | ADP-ribosylation factor GTPase-activating protein 2                  | 0.999               | 4.6                  | ADAKPGDAESGKGAFFVSK                                  | 3              | 0.999               | 200,128        | 25,679    |
| A6QR32     | A6QR32_BOVIN  | ARFGAP2    | ADP-ribosylation factor GTPase-activating protein 2                  | 0.999               | 4.9                  |                                                      |                |                     | 200,128        | 25,679    |
| A1L595     | K1C17_BOVIN   | KRT17      | Keratin, type 1 cytoskeletal 17                                      | 0.999               | 4.1                  | SLGVHLSFIRSTELDSTWSWFQLR                             | 3              | 0.999               | 5,099,817      | 913,486   |
| A1L5A7     | A1L5A7_BOVIN  | PDLIM7     | Enigma protein                                                       | 0.999               | 5.2                  | ADLEMOIENLKEELAYLR                                   | 3              | 0.999               | 2,248,496      | 242,843   |
| Q3SX40-2   | PDL17_BOVIN   | PDLIM7     | Isoform 2 of POZ and LIM domain protein 7                            | 0.999               | 10.8                 |                                                      |                |                     | 2,248,496      | 242,843   |
| A1L5B7     | A1L5B7_BOVIN  | SERPBP1    | SERPINE1 mRNA binding protein 1                                      | 0.999               | 4.4                  | ALAPAAPPRYPRTFAPSASLNKTR                             | 3              | 0.999               | 853,991        | 108,768   |
| A2BCP4     | A2BCP4_BOVIN  | SIAT 8B    | Alpha-2,8-sialyltransferase ST8Sia I                                 | 0.999               | 7.7                  | HEDKRGSGSHNWTGTVK                                    | 3              | 0.999               | 255,302        | 36,509    |
| A2I7M9     | SPA32_BOVIN   | SERPINA3-2 | Serpin A3-2                                                          | 1.000               | 22.1                 | YHYDLSLKYGYTSQASPHMTPLFEKALK                         | 3              | 0.999               | 25,082,861     | 3,463,598 |
|            |               |            |                                                                      |                     |                      | FIEDAQVLYSSEAFPTNFR                                  | 2              | 0.972               |                |           |
|            |               |            |                                                                      |                     |                      | GSTLTELLEGLK                                         | 2              | 0.988               |                |           |
|            |               |            |                                                                      |                     |                      | LLDKFIEDAQVLYSSEAFPTNFR                              | 3              | 1.000               |                |           |
|            |               |            |                                                                      |                     |                      | RIHELFLPK                                            | 2              | 0.982               |                |           |
|            |               |            |                                                                      |                     |                      | RIHELFLPK                                            | 3              | 1.000               |                |           |
|            |               |            |                                                                      |                     |                      | RVDGHTLASSNTDFAFSLYK                                 | 3              | 0.992               |                |           |
|            |               |            |                                                                      |                     |                      | SNYELNDILSQLGIR                                      | 2              | 1.000               |                |           |
|            |               |            |                                                                      |                     |                      | SNYELNDILSQLGIR                                      | 3              | 1.000               |                |           |
|            |               |            |                                                                      |                     |                      | TELVLVNIYIFK                                         | 2              | 1.000               |                |           |
| A2VDK3     | A2VDK3_BOVIN  | DAAM1      | Dishevelled associated activator of morphogenesis                    | 1.000               | 4.9                  | FVTRFDLDGLSCILNFKTMDYETSESR                          | 3              | 0.999               | 3,488,295      | 639,933   |
|            |               |            |                                                                      |                     |                      | NEDELEFAKR                                           | 3              | 0.999               |                |           |
|            |               |            |                                                                      |                     |                      | RITNQMIDSSRER                                        | 3              | 0.999               |                |           |
| A2VDM8     | BAP1_BOVIN    | BAP1       | Ubiquitin carboxyl-terminal hydrolase BAP                            | 0.999               | 4.4                  |                                                      |                |                     | 116,030        | 20,477    |
| A2VDN6     | SF3A1_BOVIN   | SF3A1      | Splicing factor 3A subunit 1                                         | 0.914               |                      | PPGSNINGVPNPPTPIVQRLPAFLDNHNYAK                      | 3              | 0.999               | 2,502,351      | 385,498   |
| A2VDP2     | PCMD1_BOVIN   | PCMTD1     | Protein-L-isoaspartate O-methyltransferase domain-containing protein | 0.999               | 5.1                  | EDSTPSKLVGIYPPPEVR                                   | 3              | 0.868               | 2,667,496      | 336,018   |
| F1MN09     | F1MN09_BOVIN  | Bl.53071   | Uncharacterized protein (Fragment)                                   | 0.999               | 2.3                  | AIDRQDYLEGYRDNAYK                                    | 3              | 0.999               | 1,579,538      | 231,991   |
| A2VDP8     | A2VDP8_BOVIN  | PDE4B      | PDE4B protein                                                        | 0.999               | 3.0                  |                                                      |                |                     | 1,579,538      | 231,991   |
| A2VE32     | A2VE32_BOVIN  | PDE4B      | PDE4B protein                                                        | 0.999               | 2.1                  |                                                      |                |                     | 1,579,538      | 231,991   |
| G3X795     | G3X795_BOVIN  | Bt.40554   | Uncharacterized protein (Fragment)                                   | 0.999               | 3.8                  | KLMHSSLNNTSISR                                       | 3              | 0.999               | 1,277,879      | 422,120   |
| A2VDQ5     | NEUL_BOVIN    | NLN        | Neurolysin, mitochondria                                             | 0.999               | 3.0                  |                                                      |                |                     | 1,277,879      | 422,120   |
| A2VDQ9     | A2VDQ9_BOVIN  | MGC151839  | Similar to calpain                                                   | 0.999               | 7.6                  | LVASRLVNTGLLRLQIVLSK                                 | 3              | 0.999               | 356,745        | 42,901    |
| E1BKJ3     | E1BKJ3_BOVIN  | MGC151839  | Uncharacterized protein (Fragment)                                   | 0.999               | 4.0                  |                                                      |                |                     | 356,745        | 42,901    |
| A2VDR1     | A2VDR1_BOVIN  | RAB40C     | RAB40C, member RAS oncogene family                                   | 0.999               | 6.4                  | TDICQGLGDCWVLLAAIASLTNRELLYR                         | 3              | 0.999               | 2,400,763      | 353,500   |
| A2VDR8     | COG7_BOVIN    | COG7       | Conserved oligomeric Golgi complex subunit                           | 0.999               | 2.9                  | SYSRGAQGIILVYDITNR                                   | 3              | 0.999               | 2,872,321      | 261,947   |
| F1N6U9     | F1N6U9_BOVIN  | Bl.102295  | Uncharacterized protein (Fragment)                                   | 0.999               | 3.2                  | CHKVQLLAWQELCQTDLPLDR                                | 3              | 0.999               | 658,173        | 148,555   |
| A2VDU3     | M3K7_BOVIN    | MAP3K7     | Mitogen-activated protein kinase kinase kinase                       | 0.999               | 3.1                  |                                                      |                |                     | 658,173        | 148,555   |
| F1MBL1     | F1MBL1_BOVIN  | Bl.16911   | Uncharacterized protein                                              | 0.999               | 4.7                  | SIQDLTVITGDPGQVSSR                                   | 3              | 0.999               | 478,803        | 46,126    |
| A2VDV2     | STK38_BOVIN   | STK38      | Serine/threonine-protein kinase 38                                   | 0.999               | 4.7                  | VTLENFYSNLIQHEEREMROK                                | 3              | 0.999               | 478,803        | 46,126    |
| A2VDW7     | A2VDW7_BOVIN  | SLCO1A2    | Solute carrier organic anion transporter family, member 1A2          | 0.999               | 3.9                  | VLAGIPAPIYFGALVDTSLHWGTLK                            | 3              | 0.999               | 406,391        | 53,161    |
| A2VDX0     | A2VDX0_BOVIN  | TWF2       | TWF2 protein                                                         | 0.999               | 6.3                  |                                                      |                |                     | 1,086,717      | 215,419   |
| F1MG94     | F1MG94_BOVIN  | WDR82P1    | Uncharacterized protein                                              | 0.999               | 3.7                  |                                                      |                |                     | 1,086,717      | 215,419   |
| E1B8I1     | E1B8I1_BOVIN  | Bt.104938  | Uncharacterized protein                                              | 0.999               | 1.8                  | KIEIGDGAELTADFLYDEVHFK                               | 3              | 0.999               | 1,121,413      | 82,794    |
| A2VDZ4     | PLK4_BOVIN    | PLK4       | Serine/threonine-protein kinase PLK4                                 | 0.999               | 1.9                  |                                                      |                |                     | 1,121,413      | 82,794    |
| A2VE00     | CC126_BOVIN   | CCDC126    | Coiled-coil domain-containing protein 126                            | 0.999               | 20.0                 | RLLEQLPLNKMFTFPK                                     | 3              | 0.999               | 859,757        | 158,049   |
| A2VE19     | A2VE19_BOVIN  | PLEKHF1    | PLEKHF1 protein                                                      | 0.999               | 2.2                  | VDYIVVNGSAASTTSGTSGNPVPLTTNK                         | 3              | 0.999               | 9,315,671      | 645,302   |
| A2VE30     | A2VE30_BOVIN  | IL2RA      | IL2RA protein                                                        | 0.999               | 8.4                  | IAAVESCFGASQPLALPGR                                  | 3              | 0.999               | 2,041,777      | 254,692   |
| P12342     | IL2RA_BOVIN   | IL2RA      | Interleukin-2 receptor subunit alpha                                 | 0.999               | 8.4                  |                                                      |                |                     | 2,041,777      | 254,692   |
| F1N2C8     | F1N2C8_BOVIN  | Bl.20073   | Uncharacterized protein (Fragment)                                   | 0.999               | 5.1                  | FVFIWPGCVTEACHDDPPSLR                                | 3              | 0.999               | 480,562        | 99,479    |
| Q5E9J9     | STRAA_BOVIN   | STRAA      | STE20-related kinase adapter protein alpha                           | 0.999               | 5.4                  |                                                      |                |                     | 480,562        | 99,479    |
| A2VE62     | A2VE62_BOVIN  | STRAA      | STE20-related kinase adapter protein alpha                           | 0.999               | 5.1                  |                                                      |                |                     | 480,562        | 99,479    |
| A2VE72     | A2VE72_BOVIN  | FAM8A1     | Family with sequence similarity 8, member A1                         | 0.999               | 5.0                  | VYLSGLRNSLMSHIGQRQR                                  | 3              | 0.999               | 282,443        | 23,392    |

|          |              |           |                                                                 |       |                       |   |       |             |            |
|----------|--------------|-----------|-----------------------------------------------------------------|-------|-----------------------|---|-------|-------------|------------|
|          |              |           |                                                                 |       | NFSIASFFPAFITLLFFQHNR | 3 | 0.999 |             |            |
| A2VE87   | A2VE87_BOVIN | GREM1     | GREM1 protein                                                   | 0.999 | 8.7                   |   |       | 2,832,512   | 323,652    |
| A3KMV1   | SHKB1_BOVIN  | SHKBP1    | SH3KBP1-binding protein 1                                       | 0.999 | 2.6                   |   |       | 10,381,190  | 7,594,250  |
| A3KMW9   | A3KMW9_BOVIN | ZNF644    | Uncharacterized protein                                         | 0.999 | 2.2                   |   |       | 2,867,508   | 552,418    |
| A3KMx8   | CF211_BOVIN  |           | UPF0364 protein C6orf211 homolog                                | 0.999 | 2.5                   |   |       | 3,706,817   | 170,196    |
| F1MC76   | F1MC76_BOVIN | Bt.48133  | Uncharacterized protein                                         | 0.999 | 2.5                   |   |       | 3,706,817   | 170,196    |
| A3KMY4   | CTL4_BOVIN   | SLC44A4   | Choline transporter-like protein -                              | 0.999 | 3.0                   |   |       | 3,681,838   | 231,858    |
| A3KN15   | A3KN15_BOVIN | VPS41     | Uncharacterized protein                                         | 0.999 | 2.0                   |   |       | 3,723,988   | 369,174    |
| A3KN19   | FA83D_BOVIN  | FAM83D    | Protein FAM83D                                                  | 0.999 | 9.3                   |   |       | 2,248,717   | 153,157    |
| F1MRT0   | F1MRT0_BOVIN | FAM83D    | Uncharacterized protein                                         | 0.999 | 9.5                   |   |       | 2,248,717   | 153,157    |
| A3KN28   | ST7L_BOVIN   | ST7L      | Suppressor of tumorigenicity 7 protein-like                     | 0.999 | 4.7                   |   |       | 2,374,029   | 286,485    |
| A3KN51   | A3KN51_BOVIN | TSG101    | TSG101 protein                                                  | 0.999 | 4.4                   |   |       | 2,628,525   | 185,271    |
| A4FUC2   | A4FUC2_BOVIN | HNRNPUL1  | HNRNPUL1 protein                                                | 0.999 | 1.8                   |   |       | 6,978,424   | 441,871    |
| A4FUE3   | A4FUE3_BOVIN | RBBP5     | RBBP5 protein                                                   | 0.999 | 3.5                   |   |       | 4,217,933   | 704,108    |
| A4FUE5   | A4FUE5_BOVIN | RAB3GAP1  | RAB3GAP1 protein                                                | 0.999 | 4.5                   |   |       | 5,618,056   | 250,703    |
| A4FUF0-2 | GLYR1_BOVIN  | GLYR1     | Isoform 2 of Putative oxidoreductase GLYR1                      | 0.999 | 10.8                  |   |       | 1,654,573   | 189,864    |
| A4FUF0   | GLYR1_BOVIN  | GLYR1     | Putative oxidoreductase GLYR1                                   | 0.999 | 5.2                   |   |       | 1,654,573   | 189,864    |
| E1B817   | E1B817_BOVIN | Bt.18876  | Uncharacterized protein                                         | 0.999 | 4.8                   |   |       | 2,665,998   | 583,638    |
| A4FUW5   | A4FUW5_BOVIN | LEO1      | LEO1 protein                                                    | 0.999 | 5.5                   |   |       | 2,665,998   | 583,638    |
| A4FUY2   | A4FUY2_BOVIN | ATF6B     | ATF6B protein                                                   | 0.999 | 2.1                   |   |       | 26,194,953  | 5,094,083  |
| A4FV12   | A4FV12_BOVIN | UBA2      | UBA2 protein                                                    | 0.999 | 3.6                   |   |       | 1,539,682   | 225,940    |
| A4FV36   | A4FV36_BOVIN | SPATA20   | SPATA20 protein                                                 | 0.999 | 3.9                   |   |       | 8,100,917   | 2,414,355  |
| A4FV70   | A4FV70_BOVIN | ALOX12E   | ALOX12E protein                                                 | 0.999 | 2.8                   |   |       | 9,162,863   | 303,346    |
| E1BDS0   | E1BDS0_BOVIN | Bt.56010  | Uncharacterized protein                                         | 0.999 | 2.7                   |   |       | 9,162,863   | 303,346    |
| A4FV80   | A4FV80_BOVIN | FBR5      | FBR5 protein                                                    | 0.999 | 4.8                   |   |       | 9,619,183   | 391,303    |
| A4FV89   | A4FV89_BOVIN | KCNF1     | KCNF1 protein                                                   | 0.999 | 3.0                   |   |       | 2,068,738   | 529,085    |
| Q5I2E5   | FCN2_BOVIN   | FCN2      | Ficolin-2                                                       | 0.999 | 4.3                   |   |       | 1,867,000   | 988,080    |
| A4FV99   | A4FV99_BOVIN | FCNB      | FCNB protein                                                    | 0.999 | 3.5                   |   |       | 1,867,000   | 988,080    |
| A4IF62   | RPC1_BOVIN   | POLR3A    | DNA-directed RNA polymerase III subunit RPC1                    | 0.999 | 1.1                   |   |       | 4,371,513   | 815,143    |
| A4IF73   | A4IF73_BOVIN | IRX4      | IRX4 protein                                                    | 0.999 | 4.4                   |   |       | 10,265,065  | 3,428,181  |
| A4IF97   | ML12B_BOVIN  | MYL12B    | Myosin regulatory light chain 12f                               | 0.999 | 10.5                  |   |       | 1,382,275   | 161,885    |
| Q5E9E2   | MYL9_BOVIN   | MYL9      | Myosin regulatory light polypeptide f                           | 0.999 | 10.5                  |   |       | 1,382,275   | 161,885    |
| A4IFA6   | ISLR_BOVIN   | ISLR      | Immunoglobulin superfamily containing leucine-rich repeat prote | 1.000 | 7.9                   |   |       | 1,647,061   | 259,998    |
| E1BQ17   | E1BQ17_BOVIN | Bt.12876  | DNA ligase                                                      | 0.999 | 3.1                   |   |       | 345,262     | 136,943    |
| A4IFC8   | A4IFC8_BOVIN | LIG1      | DNA ligase                                                      | 0.999 | 3.1                   |   |       | 345,262     | 136,943    |
| A4IFi6   | A4IFi6_BOVIN | DOC2A     | DOC2A protein                                                   | 0.999 | 8.0                   |   |       | 1,218,294   | 434,843    |
| A4IFi7   | A4IFi7_BOVIN | TMEM25    | TMEM25 protein                                                  | 0.999 | 4.1                   |   |       | 14,685,575  | 5,569,318  |
| A4IFK4   | A4IFK4_BOVIN | SYNPO2    | SYNPO2 protein                                                  | 1.000 | 3.4                   |   |       | 9,980,224   | 641,307    |
| A4IFM1   | F155A_BOVIN  | FAM155A   | Transmembrane protein FAM155A                                   | 0.999 | 6.1                   |   |       | 1,346,244   | 383,185    |
| A4IFM5   | A4IFM5_BOVIN | CDCA8     | CDCA8 protein                                                   | 0.999 | 6.8                   |   |       | 2,448,811   | 230,647    |
| A4IFN4   | A4IFN4_BOVIN | LOC615589 | LOC615589 protein                                               | 0.999 | 8.7                   |   |       | 2,668,871   | 359,585    |
| F1MLC6   | F1MLC6_BOVIN | Bt.1350   | Uncharacterized protein (Fragment                               | 0.999 | 3.3                   |   |       | 735,387     | 134,908    |
| A4IFN7   | A4IFN7_BOVIN | UBE3A     | UBE3A protein                                                   | 0.999 | 3.2                   |   |       | 735,387     | 134,908    |
| A4IFN9   | A4IFN9_BOVIN | SMG5      | SMG5 protein                                                    | 0.999 | 2.8                   |   |       | 45,085,238  | 20,661,201 |
| A4IFP2   | A4IFP2_BOVIN | KRT4      | KRT4 protein                                                    | 1.000 | 2.0                   |   |       | 1,593,251   | 122,762    |
| A4IF00-2 | THOC5_BOVIN  | THOC5     | Isoform 2 of THO complex subunit 5 homolog                      | 0.999 | 4.2                   |   |       | 88,092      | 15,542     |
| A4IF00   | THOC5_BOVIN  | THOC5     | THO complex subunit 5 homolog                                   | 0.999 | 4.3                   |   |       | 88,092      | 15,542     |
| F1MS93   | F1MS93_BOVIN | THOC5     | Uncharacterized protein                                         | 0.999 | 4.3                   |   |       | 88,092      | 15,542     |
| A4IFR5   | A4IFR5_BOVIN | SH3RF2    | SH3RF2 protein                                                  | 0.999 | 2.5                   |   |       | 7,099,629   | 894,298    |
| A4IFS7   | A4IFS7_BOVIN | CTSL1     | CTSL1 protein                                                   | 0.999 | 9.0                   |   |       | 36,793,250  | 5,050,648  |
| A4IFV6   | A4IFV6_BOVIN | ZFAND2A   | Uncharacterized protein                                         | 0.999 | 15.1                  |   |       | 1,484,254   | 217,149    |
| A5D791   | A5D791_BOVIN | EIF2AK3   | EIF2AK3 protein                                                 | 0.999 | 2.5                   |   |       | 1,174,063   | 236,920    |
| A5D795   | A5D795_BOVIN | HRH1      | HRH1 protein                                                    | 0.999 | 4.9                   |   |       | 5,315,837   | 1,093,006  |
| P30546   | HRH1_BOVIN   | HRH1      | Histamine H1 receptor                                           | 0.999 | 4.9                   |   |       | 5,315,837   | 1,093,006  |
| A5D7B4   | A5D7B4_BOVIN | ST5       | ST5 protein                                                     | 1.000 | 3.1                   |   |       | 4,403,052   | 1,252,110  |
| E1B7D6   | E1B7D6_BOVIN | Bt.19687  | Uncharacterized protein                                         | 0.999 | 2.9                   |   |       | 190,206     | 18,456     |
| F1N222   | F1N222_BOVIN | Bt.19687  | Uncharacterized protein                                         | 0.999 | 2.9                   |   |       | 190,206     | 18,456     |
| A5D7C2   | SDA1_BOVIN   | SDA1      | Protein SDA1 homolog                                            | 0.999 | 2.9                   |   |       | 190,206     | 18,456     |
| A5D7C7   | A5D7C7_BOVIN | LOC522691 | LOC522691 protein                                               | 0.999 | 5.8                   |   |       | 2,876,358   | 404,852    |
| A5D7D1   | ACTN4_BOVIN  | ACTN4     | Alpha-actinin-4                                                 | 0.999 | 2.7                   |   |       | 613,265     | 100,075    |
| A5D7H5   | CASC3_BOVIN  | CASC3     | Protein CASC3                                                   | 0.999 | 4.0                   |   |       | 2,107,017   | 240,528    |
| A5D7I0   | T10IP_BOVIN  | TSGA10IP  | Testis-specific protein 10-interacting protei                   | 0.999 | 2.9                   |   |       | 2,464,162   | 415,770    |
| A5D7I1   | A5D7I1_BOVIN | EPS15     | EPS15 protein                                                   | 1.000 | 5.1                   |   |       | 2,733,289   | 566,680    |
| E1B8R2   | E1B8R2_BOVIN | EPS15     | Uncharacterized protein                                         | 1.000 | 5.1                   |   |       | 2,733,289   | 566,680    |
| A5D7I4   | EXT1_BOVIN   | EXT1      | Exostosin-1                                                     | 0.999 | 3.6                   |   |       | 292,926     | 49,465     |
| A5D7I5   | A5D7I5_BOVIN | FGD1      | FGD1 protein                                                    | 1.000 | 2.5                   |   |       | 146,591,442 | 55,267,856 |
| A5D7I7   | A5D7I7_BOVIN | RASA3     | RASA3 protein                                                   | 0.999 | 2.0                   |   |       | 2,524,898   | 293,284    |
| Q28013   | RASA3_BOVIN  | RASA3     | Ras GTPase-activating protein :                                 | 0.999 | 2.0                   |   |       | 2,524,898   | 293,284    |
| A5D7J5   | RHOU_BOVIN   | RHOU      | Rho-related GTP-binding protein RhoL                            | 0.999 | 8.6                   |   |       | 4,569,537   | 325,625    |

| Accession | Gene   | Species | Protein Name                                                | Score          | Sequence                                                              | Score | Score      | Score                   |           |
|-----------|--------|---------|-------------------------------------------------------------|----------------|-----------------------------------------------------------------------|-------|------------|-------------------------|-----------|
| A5D7L8    | CA170  | BOVIN   | Uncharacterized protein C1orf170 homolog                    | 0.999          | MPPQGDPAPFGRCEAPPVPPR                                                 | 3     | 0.999      |                         |           |
| A5D7M3    | GAS8   | BOVIN   | GAS8                                                        | 0.999          | 2.3                                                                   |       | 10,293,033 | 1,211,282               |           |
| F1MYR3    | F1MYR3 | BOVIN   | Growth arrest-specific protein 8<br>Uncharacterized protein | 0.999<br>0.999 | PQSTPAFKPODEPQSTPAFK                                                  | 3     | 0.999      | 14,729,458<br>1,232,484 |           |
| A5D7M6    | A5D7M6 | BOVIN   | KRT5                                                        | 1.000          | KVQALVAVEKK                                                           | 3     | 0.999      |                         |           |
| Q5XQNS    | K2C5   | BOVIN   | KRT5                                                        | 1.000          | 5.4                                                                   |       | 2,140,921  | 209,301                 |           |
| E1BIL2    | E1BIL2 | BOVIN   | KRT5                                                        | 1.000          | 5.3                                                                   |       | 2,140,921  | 209,301                 |           |
|           |        |         |                                                             |                | 5.6                                                                   |       | 2,140,921  | 209,301                 |           |
|           |        |         |                                                             |                | LRSEIDNVKK                                                            | 3     | 0.999      |                         |           |
|           |        |         |                                                             |                | NKYEDEINKR                                                            | 3     | 1.000      |                         |           |
|           |        |         |                                                             |                | SLDLDSIIAEVK                                                          | 2     | 0.999      |                         |           |
| A5D7N6    | A5D7N6 | BOVIN   | KIF23                                                       | 0.999          | KIF23 protein                                                         | 1.8   |            | 1,372,841               | 240,291   |
| A5D7S7    | A5D7S7 | BOVIN   | LOX                                                         | 0.999          | LOX protein                                                           | 4.6   |            | 830,643                 | 260,554   |
| F33072    | LYOX   | BOVIN   | LOX                                                         | 0.999          | Protein-lysine 6-oxidase                                              | 4.6   |            | 830,643                 | 260,554   |
| A5D973    | A5D973 | BOVIN   | PPP2R1A                                                     | 0.999          | Alpha isoform of regulatory subunit A, protein phosphatase            | 4.1   |            | 1,515,081               | 192,833   |
| Q32PI5    | 2AAA   | BOVIN   | PPP2R1A                                                     | 0.999          | Serine/threonine-protein phosphatase 2A 65 kDa regulatory subunit A   | 4.1   |            | 1,515,081               | 192,833   |
| A5D980    | A5D980 | BOVIN   | PTPN6                                                       | 0.999          | Protein tyrosine phosphatase, non-receptor type                       | 3.4   |            | 29,070,750              | 2,345,124 |
| P19879    | MIME   | BOVIN   | OGN                                                         | 0.999          | Mimecan                                                               | 6.7   |            | 3,596,699               | 646,302   |
| A5D9E8    | A5D9E8 | BOVIN   | OGN                                                         | 0.999          | Osteoglycin preproprotein                                             | 6.7   |            | 3,596,699               | 646,302   |
| G3N088    | G3N088 | BOVIN   | OGN                                                         | 0.999          | Uncharacterized protein                                               | 5.6   |            | 3,596,699               | 646,302   |
| A5D9E9    | A5D9E9 | BOVIN   | C1R                                                         | 0.999          | Complement component 1, r subcomponent                                | 3.0   |            | 293,985                 | 31,443    |
| Q3SYT3    | Q3SYT3 | BOVIN   | C1R                                                         | 0.999          | Complement component 1, r subcomponent                                | 5.3   |            | 293,985                 | 31,443    |
| A5P369    | A5P369 | BOVIN   | SERPINA10                                                   | 0.991          | SERPINA10 protein                                                     | 3.5   |            | 721,305                 | 176,576   |
| A5PJE3    | A5PJE3 | BOVIN   | FGA                                                         | 1.000          | Fibrinogen alpha chain                                                | 20.0  |            | 14,983,587              | 1,335,208 |
| P02672    | FIBA   | BOVIN   | FGA                                                         | 1.000          | Fibrinogen alpha chain                                                | 20.0  |            | 14,983,587              | 1,335,208 |
|           |        |         |                                                             |                | EEGSVSSGTEKQEFHTGK                                                    | 3     | 1.000      |                         |           |
|           |        |         |                                                             |                | GDSVSGQGLAPGSPR                                                       | 2     | 1.000      |                         |           |
|           |        |         |                                                             |                | GNLDDFFHR                                                             | 2     | 0.997      |                         |           |
|           |        |         |                                                             |                | GNLDDFFHR                                                             | 3     | 0.959      |                         |           |
|           |        |         |                                                             |                | MEDEAESLEDLGFK                                                        | 2     | 0.960      |                         |           |
|           |        |         |                                                             |                | MSTITGPVPPREFKSQLQEAPELWK                                             | 3     | 0.896      |                         |           |
|           |        |         |                                                             |                | MVLETFGGDGHAR                                                         | 2     | 0.999      |                         |           |
|           |        |         |                                                             |                | MVLETFGGDGHAR                                                         | 3     | 0.838      |                         |           |
|           |        |         |                                                             |                | QFVSSSTVNR                                                            | 2     | 1.000      |                         |           |
|           |        |         |                                                             |                | SQLQEAPELWK                                                           | 2     | 0.947      |                         |           |
|           |        |         |                                                             |                | TGLAPEFAALGEGSSSSK                                                    | 2     | 1.000      |                         |           |
| A5PJJ8    | A5PJJ8 | BOVIN   | FANCC                                                       | 0.999          | FANCC protein                                                         | 4.1   |            | 629,809                 | 110,547   |
| O19104    | FANCC  | BOVIN   | FANCC                                                       | 0.999          | Fanconi anemia group C protein homolog                                | 4.1   |            | 629,809                 | 110,547   |
| E1B183    | E1B183 | BOVIN   | Bt.11377                                                    | 0.999          | Uncharacterized protein                                               | 5.8   |            | 856,294                 | 112,863   |
| A5PJL3    | A5PJL3 | BOVIN   | MAPK12                                                      | 0.999          | MAPK12 protein                                                        | 5.7   |            | 856,294                 | 112,863   |
| A6QLR9    | A6QLR9 | BOVIN   | MAPK14                                                      | 0.999          | MAPK14 protein                                                        | 5.8   |            | 856,294                 | 112,863   |
| A5PJ9     | A5PJ9  | BOVIN   | UNC5B                                                       | 0.999          | UNC5B protein                                                         | 1.3   |            | 1,408,585               | 239,945   |
| A5PJR2    | A5PJR2 | BOVIN   | MCL1                                                        | 0.999          | MCL1 protein                                                          | 8.0   |            | 1,482,335               | 258,907   |
| A5PJS2    | S5A1   | BOVIN   | SRDSA1                                                      | 0.999          | 3-oxo-5-alpha-steroid 4-dehydrogenase                                 | 10.5  |            | 1,349,425               | 137,202   |
| A5PJS6    | UBP10  | BOVIN   | USP10                                                       | 0.999          | Ubiquitin carboxyl-terminal hydrolase 1                               | 3.0   |            | 3,289,187               | 1,146,022 |
| A5PJT1    | A5PJT1 | BOVIN   | EPAS1                                                       | 0.999          | Endothelial PAS domain protein 1                                      | 2.2   |            | 1,944,998               | 249,791   |
| A5PJT2    | A5PJT2 | BOVIN   | INTS10                                                      | 0.999          | INTS10 protein                                                        | 3.7   |            | 2,081,484               | 163,779   |
| F1MW76    | F1MW76 | BOVIN   | Bt.5525                                                     | 0.999          | Uncharacterized protein                                               | 3.3   |            | 905,438                 | 132,453   |
| A5PJ77    | A5PJ77 | BOVIN   | ECM1                                                        | 0.999          | ECM1 protein                                                          | 3.3   |            | 905,438                 | 132,453   |
| A5PJU0    | A5PJU0 | BOVIN   | NOL6                                                        | 0.999          | NOL6 protein                                                          | 2.1   |            | 2,480,522               | 603,766   |
| A5PJU9    | SEPT1  | BOVIN   | 1-Sep                                                       | 0.999          | Septin-1                                                              | 3.5   |            | 6,293,354               | 3,186,613 |
| A5PVJ0    | MAFG   | BOVIN   | MAFG                                                        | 0.999          | Transcription factor MafG                                             | 12.4  |            | 8,628,446               | 2,362,157 |
| A5PJW8    | A5PJW8 | BOVIN   | POLR2B                                                      | 0.999          | DNA-directed RNA polymerase                                           | 1.7   |            | 1,185,349               | 164,320   |
| A5PJW9    | A5PJW9 | BOVIN   | HHIP                                                        | 0.999          | HHIP protein                                                          | 3.0   |            | 6,955,946               | 727,360   |
| F1MUJ6    | F1MUJ6 | BOVIN   | Bt.104547                                                   | 0.999          | Uncharacterized protein (Fragment)                                    | 6.1   |            | 160,921                 | 29,409    |
| A5PJZ1    | SCMC1  | BOVIN   | SLC25A24                                                    | 0.999          | Calcium-binding mitochondrial carrier protein SCA24                   | 6.1   |            | 160,921                 | 29,409    |
| A5PJZ5    | NUP93  | BOVIN   | NUP93                                                       | 0.999          | Nuclear pore complex protein Nup93                                    | 2.6   |            | 1,429,997               | 116,007   |
| A5PK26    | ACAP1  | BOVIN   | ACAP1                                                       | 0.999          | Art-GAP with coiled-coil, ANK repeat and PH domain-containing protein | 2.3   |            | 1,753,579               | 176,346   |
| F1ME87    | F1ME87 | BOVIN   | ACAP1                                                       | 0.999          | Uncharacterized protein                                               | 2.3   |            | 1,753,579               | 176,346   |
| A5PK42    | A5PK42 | BOVIN   | TTC25                                                       | 0.999          | TTC25 protein                                                         | 4.0   |            | 1,086,212               | 179,501   |
| A5PK67    | A5PK67 | BOVIN   | MGC165862                                                   | 0.999          | MGC165862 protein                                                     | 32.5  |            | 2,214,743               | 537,838   |
| A5PK75    | A5PK75 | BOVIN   | TOR1A                                                       | 0.999          | TOR1A protein                                                         | 5.4   |            | 274,846                 | 34,844    |
| A5PKC2    | A5PKC2 | BOVIN   | SHBG                                                        | 0.990          | SHBG protein                                                          | 3.5   |            | 1,413,763               | 214,189   |
| A5PKC7    | CX049  | BOVIN   | Uncharacterized protein CX049 homolog                       | 0.999          | Uncharacterized protein CX049 homolog                                 | 4.5   |            | 520,837                 | 110,302   |
| A5PKG0    | A5PKG0 | BOVIN   | ARL4C                                                       | 0.999          | ARL4C protein                                                         | 10.9  |            | 3,810,917               | 468,798   |
| A5PKH8    | A5PKH8 | BOVIN   | PGM2L1                                                      | 1.000          | PGM2L1 protein                                                        | 4.8   |            | 646,727                 | 84,899    |
| A5PKI3    | FAM3C  | BOVIN   | FAM3C                                                       | 0.999          | Protein FAM3C                                                         | 11.5  |            | 1,840,359               | 249,988   |
| A5PKI6    | A5PKI6 | BOVIN   | CC2D1A                                                      | 0.999          | CC2D1A protein                                                        | 2.8   |            | 1,353,681               | 213,534   |
| A5PKK4    | A5PKK4 | BOVIN   | MBNL2                                                       | 0.999          | MBNL2 protein                                                         | 5.3   |            | 9,376,004               | 758,952   |
| A5PKM2    | A5PKM2 | BOVIN   | CDKN1A                                                      | 0.999          | CDKN1A protein                                                        | 16.8  |            | 5,509,113               | 465,667   |
| A6H6W9    | SDS3   | BOVIN   | SUDS3                                                       | 0.999          | Sin3 histone deacetylase corepressor complex component SDS            | 14.0  |            | 5,875,206               | 697,023   |
|           |        |         |                                                             |                | NAELFQLETEQVERNYYKEK                                                  | 3     | 0.999      |                         |           |
|           |        |         |                                                             |                | SPKRPAWSSPEHPTTPAESPAQR                                               | 3     | 0.999      |                         |           |
| A6H709    | A6H709 | BOVIN   | HSPC321                                                     | 1.000          | HSPC321 protein                                                       | 7.4   |            | 1,771,022               | 343,674   |
| P0C1G6    | SWP70  | BOVIN   | SWAP70                                                      | 1.000          | Switch-associated protein 70                                          | 7.4   |            | 1,771,022               | 343,674   |
|           |        |         |                                                             |                | GIWHAFALDLHSGKVSQSLK                                                  | 3     | 0.999      |                         |           |
|           |        |         |                                                             |                | QMKELQIANENKQEQEIAVR                                                  | 3     | 0.999      |                         |           |
| A6H788    | A6H788 | BOVIN   | SNRPA1                                                      | 0.999          | SNRPA1 protein                                                        | 5.8   |            | 30,200,667              | 3,248,157 |
| A6H795    | UBE2W  | BOVIN   | UBE2W                                                       | 0.999          | Ubiquitin-conjugating enzyme E2 W                                     | 11.9  |            | 7,815,478               | 1,654,794 |
| Q5EA25    | SRPX2  | BOVIN   | SRPX2                                                       | 0.999          | Sushi repeat-containing protein SRPX2                                 | 8.0   |            | 5,259,998               | 310,927   |
| A6H7A3    | A6H7A3 | BOVIN   | SRPX2                                                       | 0.999          | Sushi repeat-containing protein, X-linked                             | 8.0   |            | 5,259,998               | 310,927   |
|           |        |         |                                                             |                | GGNYHSSLGTRELSCLDR                                                    | 3     | 0.999      |                         |           |
|           |        |         |                                                             |                | YKMGISMLQGSTCGLDLR                                                    | 3     | 0.999      |                         |           |
| A6H7C6    | A6H7C6 | BOVIN   | NECAB2                                                      | 0.999          | NECAB2 protein                                                        | 10.4  |            | 1,519,429               | 407,823   |
| A6H7E3    | A6H7E3 | BOVIN   | PDLIM1                                                      | 0.922          | PDZ and LIM domain 1                                                  | 8.2   |            | 1,459,735               | 171,258   |
| Q5E9E1    | PDL1   | BOVIN   | PDLIM1                                                      | 0.922          | PDZ and LIM domain protein 1                                          | 8.2   |            | 1,459,735               | 171,258   |



|        |              |            |                                                                            |       |                             |                                            |       |            |            |
|--------|--------------|------------|----------------------------------------------------------------------------|-------|-----------------------------|--------------------------------------------|-------|------------|------------|
|        |              |            |                                                                            |       | GCTDNMTLTVARSEQKIWSPLVTEEGK | 3                                          | 0.832 |            |            |
| A6H7G2 | DBNL_BOVIN   | DBNL       | Drebrin-like protein                                                       | 0.999 | 7.1                         |                                            |       | 2,198,430  | 255,611    |
| A6H7G8 | A6H7G8_BOVIN | GTF2H4     | GTF2H4 protein                                                             | 0.999 | 5.4                         | ASGANYTFHKESSRFQDTGPOAPVGSVYQK             | 3     | 0.999      | 1,002,631  |
| A6H7H6 | A6H7H6_BOVIN | CDH17      | CDH17 protein                                                              | 0.999 | 1.8                         | QNLRIALLGGGKAWSDDTSQLGPKD                  | 3     | 0.999      | 1,047,294  |
| A6H7I7 | GRPP1_BOVIN  | GRRP1      | Glycine/arginine-rich protein                                              | 0.999 | 9.6                         | PPLERTVSLPVTFFCK                           | 3     | 0.999      | 1,686,415  |
| G3N2V2 | G3N2V2_BOVIN | Bt.34523   | Uncharacterized protein                                                    | 0.999 | 3.6                         | DGAEGGSSAAAGSERDGRPQVSVVER                 | 3     | 0.999      | 1,890,519  |
| A6H7J1 | INSM1_BOVIN  | INSM1      | Insulinoma-associated protein                                              | 0.999 | 3.1                         | PAPAAAARACEPETPAR                          | 3     | 0.999      | 1,890,519  |
| A6QL68 | A6QL68_BOVIN | CLYBL      | CLYBL protein                                                              | 0.999 | 6.2                         |                                            |       | 5,517,221  | 1,160,359  |
| E1B168 | E1B168_BOVIN | CLYBL      | Uncharacterized protein                                                    | 0.999 | 12.6                        | GATAAAALPRLLKASLAAEVSR                     | 3     | 0.999      | 5,517,221  |
| F1MAZ6 | F1MAZ6_BOVIN | Bt.89090   | Uncharacterized protein (Fragment                                          | 0.999 | 2.6                         |                                            |       | 2,084,862  | 601,449    |
| A6QL72 | MTA3_BOVIN   | MTA3       | Metastasis-associated protein MTA3                                         | 0.999 | 2.5                         |                                            |       | 2,084,862  | 601,449    |
| A6QL85 | A6QL85_BOVIN | RCC2       | RCC2 protein                                                               | 0.999 | 6.0                         | IEELNKATATGNVEAK                           | 3     | 0.999      | 862,635    |
| A6QL98 | A6QL98_BOVIN | APLNR      | APLNR protein                                                              | 0.999 | 10.3                        | SSTAAQEVKTLDGIFTEQVAMGYSHSLVIAR            | 3     | 0.999      | 1,006,693  |
| F1MP16 | F1MP16_BOVIN | Bt.34427   | Uncharacterized protein (Fragment                                          | 0.999 | 4.8                         | AGGGGGGGGGRRGGGGGDKSASSSSSSASSGHQQGPGGGAGK | 3     | 0.999      |            |
| A6QLA9 | A6QLA9_BOVIN | TOX        | TOX protein                                                                | 0.999 | 3.4                         |                                            |       | 355,910    | 47,698     |
| E1BK72 | E1BK72_BOVIN | TOX3       | Uncharacterized protein                                                    | 0.999 | 3.2                         |                                            |       | 355,910    | 47,698     |
| Q0P5K4 | TOX4_BOVIN   | TOX4       | TOX high mobility group box family member                                  | 0.999 | 2.9                         |                                            |       | 355,910    | 47,698     |
| A6QLB7 | A6QLB7_BOVIN | CAP1       | Adenylyl cyclase-associated protein                                        | 0.999 | 4.5                         | KDPNEPKPVSAYALFFR                          | 3     | 0.999      | 3,069,146  |
| Q3SYV4 | CAP1_BOVIN   | CAP1       | Adenylyl cyclase-associated protein                                        | 0.999 | 4.5                         |                                            |       | 3,069,146  | 383,547    |
| F1MXL8 | F1MXL8_BOVIN | Bt.19916   | Uncharacterized protein                                                    | 0.999 | 1.7                         | KWRVENQENVSNLMIEDTELK                      | 3     | 0.999      | 399,131    |
| A6QLC7 | TPC11_BOVIN  | TRAPPC11   | Trafficking protein particle complex subunit 1                             | 0.999 | 1.7                         |                                            |       | 399,131    | 74,151     |
| A6QLE0 | A6QLE0_BOVIN | RNF111     | RNF111 protein                                                             | 0.999 | 1.4                         | PMAFVTLTGLDVVYNAVHR                        | 3     | 0.999      |            |
| E1B939 | E1B939_BOVIN | Bt.76294   | Uncharacterized protein                                                    | 0.999 | 4.2                         | SQAGSPYMQNCAK                              | 3     | 0.999      | 1,595,207  |
| A6QLE9 | A6QLE9_BOVIN | MTMR14     | MTMR14 protein                                                             | 0.999 | 4.5                         |                                            |       | 296,330    | 81,620     |
| A6QLH6 | NTKL_BOVIN   | SCYL1      | N-terminal kinase-like protein                                             | 0.999 | 2.7                         | LSKGEEIFFCFNFKHIIEEFSALK                   | 3     | 0.999      | 296,330    |
| F1MVK2 | F1MVK2_BOVIN | SCYL1      | Uncharacterized protein                                                    | 0.999 | 2.7                         |                                            |       | 2,257,883  | 133,871    |
| A6QLI8 | T2EA_BOVIN   | GTF2E1     | General transcription factor IIE subunit                                   | 0.999 | 4.8                         | ARAEAGLKELELSWGLHQIVK                      | 3     | 0.999      | 2,257,883  |
| A6QLJ3 | GUF1_BOVIN   | GUF1       | Translation factor GUF1, mitochondria                                      | 0.999 | 3.4                         | ERPIWLRESTVQGGAYNSEEMK                     | 3     | 0.999      | 1,415,051  |
| A6QLJ9 | A6QLJ9_BOVIN | C22H3ORF18 | C22H3ORF18 protein                                                         | 0.999 | 16.1                        |                                            |       | 531,424    | 60,271     |
| A6QLN9 | VWA1_BOVIN   |            | von Willebrand factor A domain-containing protein                          | 0.999 | 15.0                        | TTLPSQGPVQPSRLVFTDVANAIHA                  | 3     | 0.999      | 1,673,075  |
| A6QLP0 | A6QLP0_BOVIN | FOXO4      | FOXO4 protein                                                              | 0.999 | 3.9                         | ASLVHVGSRPHTEFFPGOHSSGSVAQDAIR             | 3     | 0.999      | 3,777,951  |
| A6QLR1 | A6QLR1_BOVIN | PVRL4      | Poliovirus receptor-related 4                                              | 0.999 | 6.1                         | QQLPGNATGWAWTGLDSDTDYDVALVPESNVR           | 3     | 0.999      | 635,185    |
| Q5E9Z9 | PVRL4_BOVIN  | PVRL4      | Poliovirus receptor-related protein                                        | 0.999 | 6.1                         | WSGSPCSRNRREEDAWSTR                        | 3     | 0.999      | 1,769,083  |
| A6QLR2 | A6QLR2_BOVIN | LARS       | LARS protein                                                               | 0.999 | 2.9                         |                                            |       | 297,729    | 51,446     |
| A6QLR4 | FLOT2_BOVIN  | FLOT2      | Flotillin-2                                                                | 0.999 | 5.1                         | SYSLTIVREIETOTELPSPGPRAEEDR                | 3     | 0.999      | 297,729    |
| G3X6T9 | G3X6T9_BOVIN | FLOT2      | Uncharacterized protein (Fragment                                          | 0.999 | 5.7                         |                                            |       | 5,050,654  | 372,187    |
| A6QLS3 | A6QLS3_BOVIN | CDKN1B     | CDKN1B protein                                                             | 0.999 | 12.1                        | EKLYLRGFYDGVMLVDGFK                        | 3     | 0.999      |            |
| A6QLS8 | A6QLS8_BOVIN | BRWD2      | BRWD2 protein                                                              | 0.999 | 1.8                         | VLEPYPSKLSQLKGGK                           | 3     | 0.999      | 3,858,184  |
| F1N3Y1 | F1N3Y1_BOVIN | BL40997    | Uncharacterized protein                                                    | 0.999 | 2.8                         | AEAYQKYGDAAKMALVLDALPR                     | 3     | 0.999      | 3,858,184  |
| A6QLU7 | F115C_BOVIN  | FAM115C    | Protein FAM115C                                                            | 0.999 | 2.8                         | ANRTEENVSDGSPNAGSVEQTPKK                   | 3     | 0.999      | 5,741,675  |
| E1BA49 | E1BA49_BOVIN | Bt.27545   | Uncharacterized protein                                                    | 0.999 | 8.4                         | ALLVLLSLGCFSSVAETLHSMR                     | 3     | 0.999      | 1,041,006  |
| A6QLV8 | A6QLV8_BOVIN | NRIP3      | NRIP3 protein                                                              | 0.999 | 8.8                         | GRVWLAHEGMLSPSLGPFLLNAVR                   | 3     | 0.999      | 1,447,342  |
| A6QLW1 | A6QLW1_BOVIN | PIK3R4     | PIK3R4 protein                                                             | 0.999 | 1.9                         |                                            |       | 194,372    |            |
| A6QLY4 | ISOC1_BOVIN  | ISOC1      | Isochorismatase domain-containing protein                                  | 0.999 | 4.0                         | F1N3Y1                                     |       | 5,047,185  | 404,927    |
| A6QM04 | ZWILC_BOVIN  | ZWILCH     | Protein zwilch homolog                                                     | 0.999 | 2.4                         | A6QLU7                                     |       | 5,047,185  | 404,927    |
| A6QNM9 | A6QNM9_BOVIN | SLC25A12   | SLC25A12 protein                                                           | 0.999 | 4.7                         | E1BA49                                     |       | 5,047,185  | 404,927    |
| A6QNQ9 | A6QNQ9_BOVIN | ILDR1      | ILDR1 protein                                                              | 0.999 | 3.5                         | A6QLV8                                     |       | 665,866    | 79,713     |
| A6QNS7 | A6QNS7_BOVIN | PDE4DIP    | Cardiomyopathy-associated protein                                          | 0.999 | 1.5                         | A6QLW1                                     |       | 33,754,708 | 2,231,245  |
| E1BD61 | E1BD61_BOVIN | Bt.3611    | Uncharacterized protein                                                    | 0.999 | 2.1                         | A6QLY4                                     |       | 5,017,882  | 1,392,444  |
| A6QNX5 | K2C78_BOVIN  | KRT78      | Keratin, type II cytoskeletal 78                                           | 0.999 | 2.1                         | A6QM04                                     |       | 877,026    | 163,760    |
| A6QNY2 | A6QNY2_BOVIN | TACC2      | TACC2 protein                                                              | 0.964 | 2.7                         | A6QNM9                                     |       | 4,733,867  | 625,937    |
| A6QNZ7 | A6QNZ7_BOVIN | KRT10      | Keratin 10 (Epidermolytic hyperkeratosis; keratosis palmaris et plantaris) | 1.000 | 11.6                        | A6QNQ9                                     |       | 949,712    | 274,272    |
| P06394 | K1C10_BOVIN  | KRT10      | Keratin, type I cytoskeletal 10                                            | 1.000 | 11.6                        | A6QNS7                                     |       | 840,578    | 143,769    |
|        |              |            |                                                                            |       |                             | MEMESKVEDLK                                | 3     | 0.999      | 840,578    |
|        |              |            |                                                                            |       |                             | PAGLLFQQPDLDSALQIARAEITKER                 | 3     | 0.884      | 1,049,105  |
|        |              |            |                                                                            |       |                             | DAEAWFNEK                                  | 2     | 0.997      | 313,821    |
|        |              |            |                                                                            |       |                             | IRLENIQTYR                                 | 3     | 0.999      | 19,283,054 |
|        |              |            |                                                                            |       |                             | LAADDFR                                    | 2     | 0.990      | 771,267    |
|        |              |            |                                                                            |       |                             | OSLEASLAETGR                               | 2     | 1.000      | 19,283,054 |
|        |              |            |                                                                            |       |                             | QSVEADINGLR                                | 2     | 0.991      |            |
|        |              |            |                                                                            |       |                             | QSVEADINGLRR                               | 3     | 0.933      |            |
|        |              |            |                                                                            |       |                             | VLDELTLTK                                  | 2     | 1.000      |            |
| A6QP15 | HOT_BOVIN    | ADHFE1     | Hydroxyacid-oxoacid transhydrogenase, mitochondria                         | 0.999 | 4.1                         |                                            |       | 1,263,398  | 110,918    |
| F1MAZ7 | F1MAZ7_BOVIN | ADHFE1     | Uncharacterized protein                                                    | 0.999 | 4.1                         |                                            |       | 1,263,398  | 110,918    |
| A6QP36 | A6QP36_BOVIN | LMAN2      | LMAN2 protein                                                              | 0.999 | 7.2                         | KFLFDLDDVDDGLAAIGYSK                       | 3     | 0.999      | 6,018,692  |
| A6QP39 | A6QP39_BOVIN | MSLN       | MSLN protein                                                               | 0.999 | 4.2                         | VFLLLLCALLGIIVCAVVGAVVFOKR                 | 3     | 0.999      | 4,298,204  |
| A6QP44 | A6QP44_BOVIN | FUK        | FUK protein                                                                | 0.999 | 2.2                         | KLTTTEAVLSLTVAEVQK                         | 3     | 0.999      | 410,227    |
| A6QP52 | A6QP52_BOVIN | SMTN       | SMTN protein                                                               | 1.000 | 9.2                         | PPEMGGGDADVAGYLHGARAELWR                   | 3     | 0.999      | 1,211,049  |
| A6QP55 | SFXN3_BOVIN  | SFXN3      | Sideroflexin-3                                                             | 0.999 | 9.0                         | MPGVPGGSELAAALEERLGRALEELR                 | 3     | 0.999      | 185,107    |
| A6QP79 | COL12_BOVIN  | COLEC12    | Collectin-12                                                               | 1.000 | 4.7                         | TSTRHSQQTADGSAVSTVTK                       | 3     | 0.837      | 10,497,637 |
| A6QP85 | A6QP85_BOVIN | KLHL31     | KLHL31 protein                                                             | 0.999 | 3.3                         |                                            |       | 2,828,645  |            |
| G3N1Y0 | G3N1Y0_BOVIN | KLHL31     | Uncharacterized protein                                                    | 0.999 | 2.1                         | HLPLPLVGRFVFAVAANANCINILMRQR               | 3     | 0.999      | 585,318    |
| A6QP94 | A6QP94_BOVIN | LAS1L      | LAS1L protein                                                              | 0.999 | 3.2                         | GLPGLMPGMPGPK                              | 3     | 0.999      | 95,471     |
| A6QPE8 | A6QPE8_BOVIN | KIF2C      | KIF2C protein                                                              | 0.999 | 2.1                         | KALSTNSELSFRSDILDLR                        | 3     | 0.999      | 13,119,460 |
| A6QPG6 | A6QPG6_BOVIN | LANCL2     | LANCL2 protein                                                             | 0.999 | 4.4                         |                                            |       | 668,004    | 113,537    |
| A6QPH2 | A6QPH2_BOVIN | SIPA1      | SIPA1 protein                                                              | 0.999 | 1.8                         | DVLYRDPFEGWSK                              | 3     | 0.999      | 668,004    |
|        |              |            |                                                                            |       |                             | PAGSSSGAEGEAGKQEEQGNLNDVK                  | 3     | 0.999      | 5,132,771  |
|        |              |            |                                                                            |       |                             | ALGQNKATPFRESK                             | 3     | 0.999      | 431,317    |
|        |              |            |                                                                            |       |                             | YLKDAVECSDIWQRGLLR                         | 3     | 0.999      | 14,256,913 |
|        |              |            |                                                                            |       |                             | GTISEDALPPGPPRGLSPR                        | 3     | 0.999      | 3,385,169  |
|        |              |            |                                                                            |       |                             |                                            |       | 2,141,140  | 235,472    |
|        |              |            |                                                                            |       |                             |                                            |       | 2,956,063  | 247,343    |

|        |              |           |                                                                       |       |                                  |   |       |           |           |
|--------|--------------|-----------|-----------------------------------------------------------------------|-------|----------------------------------|---|-------|-----------|-----------|
| A6QPJ4 | A6QPJ4_BOVIN | SLC17A9   | SLC17A9 protein                                                       | 0.999 | 6.6                              |   |       | 457,918   | 149,768   |
| A6QPJ6 | A6QPJ6_BOVIN | FKBP7     | FKBP7 protein                                                         | 0.999 | KPSVWAAIISQLSAACSFILLSWLPFFK     | 3 | 0.999 | 1,885,671 | 207,209   |
| A6QPL4 | KIF22_BOVIN  | KIF22     | Kinesin-like protein KIF22                                            | 0.999 | GPRSVETFKQIDTNDNR                | 3 | 0.999 | 413,155   | 50,394    |
| A6QPM5 | A6QPM5_BOVIN | ILDR2     | ILDR2 protein                                                         | 1.000 | KAVVMPLQLIQEQAASNAK              | 3 | 0.999 | 4,617,390 | 441,154   |
| A6QPP2 | A6QPP2_BOVIN | SERPIND1  | SERPIND1 protein                                                      | 0.992 | AAKAGYPPSVGVPGYPSVPLGGAPSSGMLMDK | 3 | 0.999 | 1,698,539 | 956,549   |
| A6QPR4 | A6QPR4_BOVIN | APOL3     | APOL3 protein                                                         | 0.999 | SYCQDRMGESLGMSSPRTQLSLK          | 3 | 0.999 | 2,733,896 | 378,645   |
| A6OPT4 | A6OPT4_BOVIN | MPO       | MPO protein                                                           | 0.999 | DALQDVPATQMLLNCLYFK              | 2 | 0.992 | 2,042,704 | 325,119   |
| F1MVB0 | F1MVB0_BOVIN | MPO       | Uncharacterized protein                                               | 0.999 | EAWETFVAEADLSREANVLYEYLLLEK      | 3 | 0.999 | 2,042,704 | 325,119   |
| A6QPT7 | ERAP2_BOVIN  | ERAP2     | Endoplasmic reticulum aminopeptidase 2                                | 0.999 | LFEQVMRIGLDLPALNMQRSR            | 3 | 0.999 | 505,548   | 120,025   |
| A6QPU5 | SYDM_BOVIN   | DARS2     | Aspartyl-tRNA synthetase, mitochondria                                | 0.999 | DFLSEETFRKGIHYLK                 | 3 | 0.999 | 988,030   | 187,713   |
| A6QPV0 | A6QPV0_BOVIN | EBI3      | EBI3 protein                                                          | 0.999 | FIMEEQGLVLKLETOEEDVLLTAGEHK      | 3 | 0.999 | 484,951   | 64,677    |
| A6QPV3 | A6QPV3_BOVIN | GBP4      | GBP4 protein                                                          | 0.999 | MALRLVLAFAVSLWLGCSFCR            | 3 | 0.999 | 2,328,100 | 232,331   |
| A6QPY0 | OST48_BOVIN  | DDOST     | Dolichyl-diphosphooligosaccharide--protein glycosyltransferase 48 kDa | 0.999 | TGKSYLMNRLAGQNHGFCLGSTVR         | 3 | 0.999 | 1,440,714 | 171,067   |
| F1N632 | F1N632_BOVIN | DDOST     | Uncharacterized protein                                               | 0.999 | 4.6                              |   |       | 1,440,714 | 171,067   |
| F1MJN2 | F1MJN2_BOVIN |           | Uncharacterized protein (Fragment)                                    | 0.999 | DRGFVLTFTKADDPSSLK               | 3 | 0.999 | 744,877   | 64,477    |
| F1MVM8 | F1MVM8_BOVIN |           | Uncharacterized protein (Fragment)                                    | 0.999 | 5.8                              |   |       | 744,877   | 64,477    |
| F1N7W1 | F1N7W1_BOVIN |           | Uncharacterized protein (Fragment)                                    | 0.999 | 5.7                              |   |       | 744,877   | 64,477    |
| F1MN78 | F1MN78_BOVIN | Bt.103611 | Uncharacterized protein                                               | 0.999 | 5.8                              |   |       | 744,877   | 64,477    |
| A6QPZ4 | A6QPZ4_BOVIN | SERPINB4  | SERPINB4 protein                                                      | 0.999 | 5.9                              |   |       | 744,877   | 64,477    |
| A6QPZ6 | A6QPZ6_BOVIN | TAP1      | TAP1 protein                                                          | 0.999 | ELFPEDSLKSSTVLVNNAVYFK           | 3 | 0.999 | 731,065   | 206,821   |
| F1MVB8 | F1MVB8_BOVIN | TAP1      | Uncharacterized protein                                               | 0.999 | 4.1                              |   |       | 731,065   | 206,821   |
| A6QQ20 | A6QQ20_BOVIN | TGOLN2    | TGOLN2 protein (Fragment)                                             | 0.999 | 4.1                              |   |       |           |           |
| A6QQ54 | A6QQ54_BOVIN | LOC616319 | LOC616319 protein                                                     | 0.999 | WYKWLAEQVQESLAKSSQVAIEVLSAMPTVR  | 3 | 0.999 | 3,640,432 | 1,096,652 |
| A6QQ82 | A6QQ82_BOVIN | WDR38     | Uncharacterized protein                                               | 0.999 | 10.3                             |   |       | 7,555,839 | 2,686,313 |
| A6QQ91 | RASL3_BOVIN  | RASAL3    | RAS protein activator like-3                                          | 0.999 | TEPGGKVLADPSSPQQELEGKPLELTDVEPK  | 3 | 0.999 | 6,855,550 | 645,936   |
| A6QQ94 | DMTA2_BOVIN  | DMRTA2    | Doublesex- and mab-3-related transcription factor A                   | 0.999 | GWAPTFLGYSMQGLFKFGLYEVFK         | 3 | 0.999 | 2,157,254 | 194,863   |
| A6QQA1 | A6QQA1_BOVIN | MFS2      | MFS2 protein                                                          | 0.999 | FFGRHRGVEVNSAFSPDQGR             | 3 | 0.999 | 1,185,482 | 132,664   |
| A6QQI5 | A6QQI5_BOVIN | ATG4D     | ATG4D protein                                                         | 0.999 | TTPRAGPGQLFWAER                  | 3 | 0.999 | 3,616,654 | 367,194   |
| E1BI38 | E1BI38_BOVIN | Bl.99087  | Uncharacterized protein                                               | 0.999 | 6.4                              |   |       | 531,782   | 64,484    |
| E1BI39 | E1BI39_BOVIN | Bl.99087  | Uncharacterized protein                                               | 0.999 | 5.6                              |   |       | 5,561,920 | 274,731   |
| A6QQP0 | A6QQP0_BOVIN | MYEF2     | MYEF2 protein                                                         | 0.999 | 3.0                              |   |       | 5,561,920 | 274,731   |
| A6QQR3 | A6QQR3_BOVIN | APOL3     | APOL3 protein                                                         | 0.999 | 3.3                              |   |       | 5,561,920 | 274,731   |
| A6QQR4 | ERC6L_BOVIN  | ERCC6L    | DNA excision repair protein ERCC-6-like                               | 0.999 | EKVGVEVTVYELFKDAEGK              | 3 | 0.999 | 1,220,168 | 176,975   |
| A6QQR7 | A6QQR7_BOVIN | GPD1L     | GPD1L protein                                                         | 0.999 | GARIWRVSGFLFMGLDVYCLVK           | 3 | 0.999 | 8,118,867 | 627,705   |
| A6QQW3 | A6QQW3_BOVIN | SRP68     | SRP68 protein                                                         | 0.999 | VVIFDPSWNPATDAQAVDR              | 3 | 0.999 | 697,687   | 98,192    |
| A6QQX0 | A6QQX0_BOVIN | PBK       | PBK protein                                                           | 0.999 | GQVSTATFLESCGVADLITTCYGGRRNK     | 3 | 0.999 | 3,134,783 | 1,933,489 |
| A6QQX8 | A6QQX8_BOVIN | USP39     | USP39 protein                                                         | 0.999 | 3.7                              |   |       | 1,030,326 | 269,968   |
| A7Z015 | A7Z015_BOVIN | LHX1      | LHX1 protein                                                          | 0.999 | QVPGGGGGGGGGGGGGGGGGGG           | 3 | 0.999 | 4,660,120 | 1,182,318 |
| A6QQY6 | A6QQY6_BOVIN | LHX5      | LHX5 protein                                                          | 0.999 | 7.7                              |   |       | 2,548,794 | 308,052   |
| A6QQZ7 | MPP7_BOVIN   | MPP7      | MAGUK p55 subfamily member 7                                          | 0.999 | ASDGSLSCLAMEYGGKESLNDLIEER       | 3 | 0.999 | 2,548,794 | 308,052   |
| A6QR12 | A6QR12_BOVIN | YME1L1    | Uncharacterized protein                                               | 0.999 | 2.7                              |   |       |           |           |
| A6QR17 | A6QR17_BOVIN | S1PR3     | S1PR3 protein                                                         | 0.999 | NPTIVNFPITNVDLR                  | 3 | 0.999 | 1,751,439 | 369,742   |
| A6QR43 | A6QR43_BOVIN | PJA2      | PJA2 protein                                                          | 0.999 | PEEIIQLAQSQGAIKFIIPSIK           | 3 | 0.999 | 8,437,058 | 1,147,727 |
| F1MGM7 | F1MGM7_BOVIN | Bl.353    | Uncharacterized protein (Fragment)                                    | 0.999 | 2.8                              |   |       | 4,515,096 | 314,102   |
| A6QR65 | A6QR65_BOVIN | RPH3A     | Rabphilin 3A homolog (Mouse)                                          | 0.999 | 2.8                              |   |       | 1,599,829 | 195,072   |
| Q06846 | RP3A_BOVIN   | RPH3A     | Rabphilin-3A                                                          | 0.999 | 7.9                              |   |       | 967,248   | 263,135   |
| A7E2Y7 | A7E2Y7_BOVIN | LENG8     | LENG8 protein                                                         | 0.999 | EGSMFVALGASTCSLLAIAIERHLMIKMR    | 3 | 0.999 | 4,806,254 | 270,022   |
| F1MIZ8 | F1MIZ8_BOVIN | Bl.24236  | Uncharacterized protein                                               | 0.999 | 3.1                              |   |       | 6,404,313 | 924,860   |
| A7E300 | RHG07_BOVIN  | DLC1      | Rho GTPase-activating protein 1                                       | 0.999 | SVQRWREALEVEENGSDLLIK            | 3 | 0.999 | 6,404,313 | 924,860   |
| A7E303 | A7E303_BOVIN | COL8A1    | COL8A1 protein                                                        | 0.999 | 2.2                              |   |       |           |           |
| A7E350 | A7E350_BOVIN | PLG       | PLG protein                                                           | 1.000 | 2.1                              |   |       |           |           |
| A7E369 | CC070_BOVIN  | UPF0524   | UPF0524 protein C3orf70 homolog                                       | 0.999 | 2.1                              |   |       |           |           |
| A7MAZ1 | A7MAZ1_BOVIN | GDPD5     | GDPD5 protein                                                         | 0.999 | 2.1                              |   |       |           |           |
| A7MB05 | TM215_BOVIN  | TMEM215   | Transmembrane protein 215                                             | 0.999 | 2.1                              |   |       |           |           |
| A7MB07 | A7MB07_BOVIN | ADAMT5    | ADAMT5 protein                                                        | 0.999 | 2.2                              |   |       |           |           |
| A7MB11 | TGFA1_BOVIN  | TGFBRAP1  | Transforming growth factor-beta receptor-associated protein           | 0.999 | 2.3                              |   |       |           |           |
| F1MWF9 | F1MWF9_BOVIN | TGFBRAP1  | Uncharacterized protein                                               | 0.999 | 2.3                              |   |       |           |           |
| E1BM05 | E1BM05_BOVIN | Bt.21548  | Uncharacterized protein                                               | 0.930 | 3.4                              |   |       |           |           |
| A7MB32 | A7MB32_BOVIN | STK38L    | STK38L protein                                                        | 0.930 | 3.4                              |   |       |           |           |
| A7MB35 | ODPA_BOVIN   | PDHA1     | Pyruvate dehydrogenase E1 component subunit alpha, somatic form,      | 0.999 | 4.5                              |   |       |           |           |
| E1BLH1 | E1BLH1_BOVIN | Bt.44470  | Uncharacterized protein                                               | 0.999 | 4.5                              |   |       |           |           |
| A7MB41 | A7MB41_BOVIN | SATB1     | SATB1 protein                                                         | 0.999 | 4.5                              |   |       |           |           |
| A7MB44 | A7MB44_BOVIN | SLC9A6    | Sodium/hydrogen exchange                                              | 0.999 | 5.5                              |   |       |           |           |
| A7MB45 | ACSS3_BOVIN  | ACSS3     | Acyl-CoA synthetase short-chain family member 3, mitochondria         | 0.999 | 8.5                              |   |       |           |           |
| F1MQV8 | F1MQV8_BOVIN | ACSS3     | Uncharacterized protein                                               | 0.999 | 2.5                              |   |       |           |           |
| A7MB62 | ARP2_BOVIN   | ACTR2     | Actin-related protein 2                                               | 0.999 | 2.5                              |   |       |           |           |
| F1MRG7 | F1MRG7_BOVIN | Bt.104912 | Uncharacterized protein                                               | 0.999 | 1.9                              |   |       |           |           |
| A7MB67 | A7MB67_BOVIN | ZYG11B    | Uncharacterized protein                                               | 0.999 | 1.9                              |   |       |           |           |
| A7MB44 | A7MB44_BOVIN | PAG17     | PAG17 protein                                                         | 0.999 | 1.9                              |   |       |           |           |

|        |              |           |                                                                    |       |                                  |   |       |               |            |
|--------|--------------|-----------|--------------------------------------------------------------------|-------|----------------------------------|---|-------|---------------|------------|
|        |              |           |                                                                    |       | NTLNFLKHEITYSLSQISSRGSNLIHPLR    | 3 | 0.999 |               |            |
| A7MBD5 | A7MBD5_BOVIN | PIK3R6    | PIK3R6 protein                                                     | 0.999 | 2.0                              |   |       | 2,538,169     | 452,696    |
| A7MBD9 | A7MBD9_BOVIN | CPM       | CPM protein                                                        | 0.999 | ALLSHRTREVTVSLR                  | 3 | 0.999 | 2,825,317     | 480,672    |
| A7MBE2 | A7MBE2_BOVIN | SEC14L1   | SEC14L1 protein                                                    | 0.999 | FGYEYLLLLPGSYVIEVTVPGHDPHLTK     | 3 | 0.999 | 10,184,309    | 603,584    |
| A7MBJ4 | PTPRF_BOVIN  | PTPRF     | Receptor-tye tyrosine-protein phosphatase I                        | 0.999 | PAASLTVVVDPDLTK                  | 3 | 0.999 | 296,756       | 72,606     |
| A7MBK5 | A7MBK5_BOVIN | LOC510651 | LOC510651 protein                                                  | 0.910 | FSIPSPSQEVMPPGGSVNLTCVAVGAMPYVK  | 3 | 0.999 | 671,443       | 57,106     |
| A7Z077 | A7Z077_BOVIN | LOC510651 | LOC510651 protein                                                  | 0.910 | 0.7                              |   |       | 671,443       | 57,106     |
| F1MXV7 | F1MXV7_BOVIN | Bt.59609  | Uncharacterized protein (Fragment                                  | 0.999 | SYKQGERTSDR                      | 3 | 0.812 | 241,189       | 46,862     |
| A7YW22 | A7YW22_BOVIN | JAM3      | JAM3 protein                                                       | 0.999 | 6.5                              |   |       | 241,189       | 46,862     |
| A7YWC4 | ATAD3_BOVIN  | ATAD3     | ATPase family AAA domain-containing protein 1                      | 0.999 | NSSFVNLNPEITLVFSAVHK             | 3 | 0.999 | 3,838,825     | 373,966    |
| A7YWF1 | A7YWF1_BOVIN | ACSS2     | ACSS2 protein                                                      | 0.934 | NEMLRVFAEARAR                    | 3 | 0.999 | 2,281,275     | 281,763    |
| A7YWF3 | A7YWF3_BOVIN | NPHP1     | NPHP1 protein                                                      | 0.999 | ILDSNCSLITTDIFYR                 | 3 | 0.833 | 4,831,825     | 1,444,418  |
| A7YWG6 | A7YWG6_BOVIN | BMPR1B    | BMPR1B protein                                                     | 0.999 | LTHLQELAVSISR                    | 3 | 0.999 | 3,194,931     | 476,146    |
| A7YWH9 | RHDF1_BOVIN  | RHDF1     | Inactive rhomboid protein 1                                        | 0.999 | DIEGQSSSGSGGLPLLVQRTIAK          | 3 | 0.999 | 2,483,841     | 219,349    |
| A7YWJ7 | A7YWJ7_BOVIN | FYB       | FYB protein                                                        | 0.999 | SGCVQTSEECSSTLAVVVK              | 3 | 0.999 | 1,149,757     | 243,789    |
| A7YWK3 | K2C73_BOVIN  | KRT73     | Keratin, type II cytoskeletal 7c                                   | 0.999 | ITQEESAPAGPAKFLKTPSK             | 3 | 0.999 | 1,991,625     | 257,212    |
| E1BB55 | E1BB55_BOVIN | Bt.20954  | Uncharacterized protein                                            | 0.999 | LGSTSEKDLLKTKPALSSPTK            | 3 | 0.999 | 1,522,058     | 114,768    |
| A7YW17 | A7YW17_BOVIN | CLUAP1    | CLUAP1 protein                                                     | 0.999 | 5.3                              |   |       | 1,522,058     | 114,768    |
| A7YY64 | A7YY64_BOVIN | B3GNT2    | B3GNT2 protein                                                     | 0.999 | AARQLASEITSGKASLYDLLGK           | 3 | 0.999 | 324,554       | 71,763     |
| A7Z018 | A7Z018_BOVIN | RCC1      | RCC1 protein                                                       | 0.999 | FESEKHODILLWNYR                  | 3 | 0.999 | 7,091,629     | 982,184    |
| F1MJ46 | F1MJ46_BOVIN | AZ7019    | Uncharacterized protein                                            | 0.999 | VSHRSHGTEPGVVLTLGGDVGQLGLGENVMER | 3 | 0.999 | 2,136,038     | 279,816    |
| A7Z019 | SMCA4_BOVIN  | SMARCA4   | Transcription activator BRG1                                       | 0.999 | 1.0                              |   |       | 2,136,038     | 279,816    |
| A7Z025 | A7Z025_BOVIN | PRPF8     | PRPF8 protein                                                      | 0.999 | HEEEFDLFMRMLDRR                  | 3 | 0.999 | 3,652,790     | 488,075    |
| A7Z042 | A7Z042_BOVIN | NKD1      | NKD1 protein                                                       | 1.000 | ATKFQSTKLDWVEVLQVCR              | 3 | 0.999 |               |            |
| A7Z049 | A7Z049_BOVIN | WDR81     | Uncharacterized protein                                            | 0.999 | VESHFDLELRAAVMHDLDMMPGEGIK       | 3 | 0.999 | 1,315,180,000 | 88,380,882 |
| A7Z060 | A7Z060_BOVIN | RNF219    | RNF219 protein                                                     | 0.999 | 2.8                              |   |       | 6,717,133     | 605,464    |
| A7Z061 | CDC27_BOVIN  | CDC27     | Cell division cycle protein 27 homolog                             | 1.000 | AQKGSVGVGHVAR                    | 3 | 0.999 | 3,853,008     | 526,122    |
| A7Z062 | A7Z062_BOVIN | ZC3H7A    | Uncharacterized protein                                            | 0.999 | TRTSSASMDAAYLDK                  | 3 | 0.999 | 1,969,696     | 227,353    |
| A7Z081 | A7Z081_BOVIN | C3H1ORF92 | C3H1ORF92 protein                                                  | 0.999 | QPETVLTETPDQIENLR                | 3 | 0.999 | 1,467,116     | 330,885    |
| E1BDU2 | E1BDU2_BOVIN | C3H1ORF92 | Uncharacterized protein                                            | 0.999 | EWWTYMKENGIDMEQFYELWLK           | 3 | 0.999 | 2,126,634     | 177,056    |
| A8E4L8 | A8E4L8_BOVIN | LMO7      | LMO7 protein                                                       | 0.999 | 5.5                              |   |       | 2,126,634     | 177,056    |
| A8E4N1 | A8E4N1_BOVIN | AIM1L     | AIM1L protein                                                      | 0.999 | VGLTDKLTTFIALLPLCSSTLRK          | 3 | 0.999 | 1,670,339     | 288,495    |
| A8E857 | AASS_BOVIN   | AASS      | Alpha-aminoadipic semialdehyde synthase, mitochondri               | 0.999 | TOSSSISIVQRPDTRQLASGSSSER        | 3 | 0.999 | 16,217,693    | 9,169,801  |
| F1MY13 | F1MY13_BOVIN | Bt.39765  | Uncharacterized protein                                            | 0.999 | 3.0                              |   |       | 743,176       | 84,469     |
| A8K0C6 | A8K0C6_BOVIN | SLC12A5   | SLC12A5 protein (Fragment)                                         | 0.999 | DYITPEISLYSEEGLK                 | 3 | 0.999 | 743,176       | 84,469     |
| A8QQJ5 | A8QQJ5_BOVIN | ZNF514    | Uncharacterized protein                                            | 0.999 | SAPGPAGFLEEHAHPTPSQEVPAAHDPQEQDR | 3 | 0.999 |               |            |
| E1B7G1 | E1B7G1_BOVIN | ZNF514    | Uncharacterized protein                                            | 0.999 | 2.3                              |   |       | 301,341       | 37,191     |
| A8SM77 | A8SM77_BOVIN | ZNF713    | Uncharacterized protein                                            | 0.999 | TVGLPTAMAAKMLLDGIEQAK            | 3 | 0.999 | 8,276,452     | 1,966,809  |
| P42026 | NDUS7_BOVIN  | NDUFS7    | NADH dehydrogenase [ubiquinone] iron-sulfur protein 7, mitochondri | 0.999 | ENLWSSYLTGKIVIVER                | 3 | 0.999 | 301,341       | 37,191     |
| A8WFOQ | A8WFOQ_BOVIN | NDUFS7    | NDUFS7 protein                                                     | 0.999 | 2.9                              |   |       | 3,149,708     | 547,085    |
| A8YX22 | A8YX22_BOVIN | C8G       | C8G protein                                                        | 0.999 | RGHESSESSTSSGLR                  | 3 | 0.999 | 175,057       | 33,996     |
| B0JYP5 | B0JYP5_BOVIN | EIF2C2    | Eukaryotic translation initiation factor 2C, 1                     | 1.000 | NLVALGHQLYKPEVITOLEEQQEWMMGR     | 3 | 0.999 | 175,057       | 33,996     |
| F1MTG8 | F1MTG8_BOVIN | EIF2C2    | Uncharacterized protein (Fragment)                                 | 1.000 | 12.5                             |   |       | 3,283,040     | 844,590    |
| B2ZEZ4 | B2ZEZ4_BOVIN | Skint1    | Skint 1 isoform a (Precursor                                       | 0.999 | YVVMGSCANGGYYHYSSVVRGCCR         | 3 | 0.999 | 799,258       | 152,945    |
| B3FXL3 | B3FXL3_BOVIN | IrakM     | Interleukin-1 receptor-associated kinase M transcript variant      | 0.999 | AEATLTHVAPQGSAMVVSIFRKLDIGICWAVR | 3 | 0.999 | 799,258       | 152,945    |
| B3FXL5 | B3FXL5_BOVIN | IrakM     | Interleukin-1 receptor-associated kinase M transcript variant      | 0.999 | 3.4                              |   |       | 25,951,221    | 2,635,976  |
| B8Y9T0 | B8Y9T0_BOVIN | FN1       | Cumulus cell-specific fibronectin 1 transcript varian              | 1.000 | LILGLIALPLTFTMASSIALHHR          | 3 | 0.999 | 1,701,281     | 213,319    |
| B8Y9S9 | B8Y9S9_BOVIN | FN1       | Embryo-specific fibronectin 1 transcript varian                    | 1.000 | 4.3                              |   |       | 1,701,281     | 213,319    |
| P07589 | F1NC_BOVIN   | FN1       | Fibronectin                                                        | 1.000 | LSIKTDIYSFGIVIMEVLTGCK           | 3 | 0.999 | 1,954,422     | 172,211    |
| G5E5A9 | G5E5A9_BOVIN | FN1       | Uncharacterized protein                                            | 1.000 | 2.6                              |   |       | 1,954,422     | 172,211    |
|        |              |           |                                                                    |       | 2.4                              |   |       | 1,954,422     | 172,211    |
|        |              |           |                                                                    |       | 2.3                              |   |       | 1,954,422     | 172,211    |
|        |              |           |                                                                    |       | ITIMWTPPESPVTGYR                 | 2 | 0.983 |               |            |
|        |              |           |                                                                    |       | SYTTLQLPQGTDKY                   | 2 | 0.987 |               |            |
|        |              |           |                                                                    |       | TFYIQIGDSWEK                     | 2 | 0.983 |               |            |
|        |              |           |                                                                    |       | VTWAPPPSIELTILLVR                | 2 | 0.995 |               |            |
| C4IXV8 | C4IXV8_BOVIN | TPC3      | Two pore channel 3                                                 | 0.999 | 3.9                              |   |       | 2,928,406     | 513,455    |
| C5NU11 | C5NU11_BOVIN | PD-L1     | Programmed death ligand 1                                          | 0.999 | IHFLDPGSGSPDALVCGNPALKDSFAAQGR   | 3 | 0.999 | 2,655,794     | 266,650    |
| D9IE06 | D9IE06_BOVIN | OPA3      | Mitochondrial optic atrophy 3 protein isoform I                    | 0.999 | IIQFVNGKEDPNVQHSYHGRAQLLK        | 3 | 0.999 | 3,066,992     | 506,498    |
| E1AXU0 | E1AXU0_BOVIN | CMYA1     | Cardiomyopathy associated protein 1                                | 1.000 | EVRAQLRAGDPPSTPGAASTSQAASSPK     | 3 | 0.999 | 2,442,792     | 315,381    |
| E1B6X6 | E1B6X6_BOVIN | Bt.32325  | Uncharacterized protein                                            | 0.954 | EQQEREEEEKPPQGGPQPEIPHK          | 3 | 0.999 | 5,637,344     | 624,238    |
| E1B702 | E1B702_BOVIN | TGFBR2    | Uncharacterized protein                                            | 0.999 | WLSKPAALAHSAEEGGQGHK             | 3 | 0.999 |               |            |
| G3MZV8 | G3MZV8_BOVIN | TGFBR2    | Uncharacterized protein                                            | 0.999 | 2.4                              |   |       | 2,310,600     | 261,710    |
| E1B714 | E1B714_BOVIN | Bt.21602  | Uncharacterized protein                                            | 0.999 | EVVKFEQVDTAEADMISAVKSR           | 3 | 0.804 | 2,310,600     | 261,710    |
| E1B719 | E1B719_BOVIN | Bt.60688  | Uncharacterized protein                                            | 0.999 | YAVGEEDFEVGK                     | 3 | 0.851 | 6,494,721     | 876,852    |
| F1MJB7 | F1MJB7_BOVIN | Bt.306    | Uncharacterized protein                                            | 1.000 | EVEDSDSGRDPAPPGR                 | 3 | 0.999 | 2,331,944     | 1,333,893  |
| P06868 | PLMN_BOVIN   | PLG       | Plasminogen                                                        | 1.000 | GADGAEGDRGRDTR                   | 3 | 0.999 | 6,439,084     | 319,718    |
| E1B726 | E1B726_BOVIN | PLG       | Uncharacterized protein                                            | 1.000 | 10.1                             |   |       | 6,439,084     | 319,718    |
|        |              |           |                                                                    |       | 10.1                             |   |       | 6,439,084     | 319,718    |
|        |              |           |                                                                    |       | EQQCVMIAENSK                     | 2 | 0.999 |               |            |
|        |              |           |                                                                    |       | EQSVQEIPIVSR                     | 2 | 0.987 |               |            |
|        |              |           |                                                                    |       | GTSSITITGR                       | 2 | 1.000 |               |            |
|        |              |           |                                                                    |       | HFCGGTLISPK                      | 2 | 0.999 |               |            |
|        |              |           |                                                                    |       | NYGGTVAVTESGHTCOR                | 3 | 1.000 |               |            |
|        |              |           |                                                                    |       | VSPYVPWIEETMR                    | 2 | 0.996 |               |            |
|        |              |           |                                                                    |       | WFECDIPR                         | 2 | 1.000 |               |            |
| E1B740 | E1B740_BOVIN | SNAPC4    | Uncharacterized protein                                            | 0.999 | 2.5                              |   |       | 2,659,079     | 313,017    |
| E1B744 | E1B744_BOVIN | Bt.11942  | Uncharacterized protein                                            | 0.999 | GAVAGGCPRPPEGPDTAQATAPAPTGLASRSR | 3 | 0.999 | 2,520,051     | 240,836    |
| E1B763 | E1B763_BOVIN | AP3M2     | Uncharacterized protein                                            | 0.999 | 2.5                              |   |       | 3,458,837     | 298,321    |
|        |              |           |                                                                    |       | PASARAGVLFVAIDPAQAVVSVGVK        | 3 | 0.999 |               |            |
|        |              |           |                                                                    |       | 4.3                              |   |       |               |            |

|        |              |           |                                                          |       |                    |                                        |       |            |           |
|--------|--------------|-----------|----------------------------------------------------------|-------|--------------------|----------------------------------------|-------|------------|-----------|
|        |              |           |                                                          |       | MIHSLFLINSSGDIFLEK | 3                                      | 0.999 |            |           |
| E1B766 | E1B766_BOVIN | C1QTNF7   | Uncharacterized protein                                  | 0.999 | 6.9                |                                        |       | 827,499    | 177,280   |
| F1N0F4 | F1N0F4_BOVIN | C1QTNF7   | Uncharacterized protein                                  | 0.999 | 7.1                |                                        |       | 827,499    | 177,280   |
| E1BDP5 | E1BDP5_BOVIN | Bt.59370  | Uncharacterized protein                                  | 0.999 |                    | GEQGGDPLGPGVCRSGSIVLK                  | 3     | 0.999      |           |
| E1B768 | E1B768_BOVIN | Bt.93579  | Uncharacterized protein                                  | 0.999 | 2.1                |                                        |       | 120,952    | 13,724    |
|        |              |           |                                                          |       | 2.1                |                                        |       | 120,952    | 13,724    |
| E1B782 | E1B782_BOVIN | HERC2     | Uncharacterized protein                                  | 1.000 | 1.1                |                                        |       | 1,895,366  | 733,454   |
| G3MX12 | G3MX12_BOVIN | HERC2     | Uncharacterized protein (Fragment)                       | 1.000 | 1.1                |                                        |       | 1,895,366  | 733,454   |
|        |              |           |                                                          |       |                    | LCSHRQALGDHAQAFLOAIADNNIQDHNVK         | 3     | 0.999      |           |
|        |              |           |                                                          |       |                    | LGVGGTESVSTPTLLESIQHVFIK               | 3     | 0.999      |           |
| E1B783 | E1B783_BOVIN | TTC13     | Uncharacterized protein                                  | 0.999 | 5.0                |                                        |       | 13,374,091 | 1,674,821 |
|        |              |           |                                                          |       |                    | OKVDFIDAYKSLGQAYR                      | 3     | 0.999      |           |
| E1B789 | E1B789_BOVIN | Bt.60535  | Uncharacterized protein                                  | 0.999 |                    | SWMNLKSISSPYKTLPSVSETFPTLR             | 3     | 0.999      |           |
| E1B7A1 | E1B7A1_BOVIN | PHF12     | Uncharacterized protein                                  | 0.999 |                    | QRSSNLVGTINIHTGDWVRK                   | 3     | 0.999      |           |
| E1B7B4 | E1B7B4_BOVIN | MEP1B     | Uncharacterized protein                                  | 0.963 | 3.1                |                                        |       | 1,742,311  | 355,819   |
| E1B7D8 | E1B7D8_BOVIN | LOC538492 | Uncharacterized protein                                  | 0.999 |                    | VLTPPQAAGDGLATGANORFCSPAPSSDVK         | 3     | 0.999      |           |
| E1B7E2 | E1B7E2_BOVIN | DOCK3     | Uncharacterized protein (Fragment)                       | 0.999 | 4.3                |                                        |       | 604,135    | 104,053   |
| E1B7E3 | E1B7E3_BOVIN | Bt.52427  | Uncharacterized protein                                  | 0.999 |                    | TLTLVEIKDIPSGSWLQYHVTLNATNKKFR         | 3     | 0.827      |           |
| E1B7G2 | E1B7G2_BOVIN | Bt.2859   | Uncharacterized protein                                  | 0.999 | 5.7                |                                        |       | 7,862,092  | 979,868   |
| F1MWB0 | F1MWB0_BOVIN | Bt.2859   | Uncharacterized protein (Fragment)                       | 0.999 |                    | GPGGPGTGPQCAGLERR                      | 3     | 0.999      |           |
| E1B7G4 | E1B7G4_BOVIN | KRBA1     | Uncharacterized protein                                  | 0.999 | 0.6                |                                        |       | 8,810,600  | 657,253   |
| E1B7G8 | E1B7G8_BOVIN | NEK5      | Uncharacterized protein                                  | 0.999 |                    | FRGSHLRFEFR                            | 3     | 0.999      |           |
| E1B7H2 | E1B7H2_BOVIN | Bt.12599  | Uncharacterized protein                                  | 0.999 | 0.7                |                                        |       | 1,860,326  | 258,467   |
| E1B7I1 | E1B7I1_BOVIN | Bt.87248  | Uncharacterized protein (Fragment)                       | 0.999 |                    | LKKELENTALELSQK                        | 3     | 0.999      |           |
| E1B7I9 | E1B7I9_BOVIN | FRS2      | Uncharacterized protein                                  | 0.999 | 6.0                |                                        |       | 2,003,192  | 114,935   |
| E1B7L2 | E1B7L2_BOVIN | Bt.515    | Uncharacterized protein                                  | 0.999 | 6.6                |                                        |       | 2,003,192  | 114,935   |
| P23726 | P85B_BOVIN   | PIK3R2    | Phosphatidylinositol 3-kinase regulatory subunit bet     | 0.999 |                    | YODLLSVQHPRVKQLEYR                     | 3     | 0.999      |           |
| E1B7L7 | UBN2_BOVIN   | UBN2      | Ubiquitin-2                                              | 0.999 | 1.4                |                                        |       | 3,461,728  | 2,022,358 |
| G5E568 | G5E568_BOVIN | UBN2      | Uncharacterized protein                                  | 0.999 |                    | AEPNWAAGMEGLR                          | 3     | 0.999      |           |
| E1B7M8 | E1B7M8_BOVIN | OSBP2     | Oxysterol-binding protein                                | 0.999 | 2.8                |                                        |       | 4,552,408  | 531,672   |
| E1B7N9 | E1B7N9_BOVIN | Bt.104196 | Uncharacterized protein                                  | 0.999 |                    | LAAMCGHYDHFYAQLDLLRK                   | 3     | 0.999      |           |
| E1B7P5 | E1B7P5_BOVIN | MEFV      | Uncharacterized protein                                  | 0.999 | 1.4                |                                        |       | 1,486,621  | 527,082   |
| E1B7P6 | E1B7P6_BOVIN | EFCAB5    | Uncharacterized protein                                  | 0.999 |                    | PGLQGRPGTGPPAGHGDPGPPGAPGLAGPAGPGSPGLK | 3     | 0.999      |           |
| G3N0P8 | G3N0P8_BOVIN | EFCAB5    | Uncharacterized protein (Fragment)                       | 0.999 | 4.6                |                                        |       | 6,669,792  | 796,603   |
| E1B7Q1 | E1B7Q1_BOVIN | EMX1      | Uncharacterized protein                                  | 0.999 |                    | NKSGAAFGVAPALPGQVTRVR                  | 3     | 0.999      |           |
| E1B7O6 | E1B7O6_BOVIN | MED1      | Uncharacterized protein                                  | 0.999 | 2.8                |                                        |       | 3,887,079  | 239,414   |
| E1B7O8 | E1B7O8_BOVIN | PTH2R     | Uncharacterized protein                                  | 0.999 |                    | NNHQTELEVPRTPR                         | 3     | 0.999      |           |
| E1B7R2 | E1B7R2_BOVIN |           | Uncharacterized protein                                  | 0.999 | 2.4                |                                        |       | 669,136    | 94,338    |
| E1B7R9 | E1B7R9_BOVIN | PRCD      | Uncharacterized protein                                  | 0.999 | 2.4                |                                        |       | 669,136    | 94,338    |
| E1B7S3 | E1B7S3_BOVIN | EPB41L3   | Uncharacterized protein                                  | 0.999 |                    | LEQLRAQASDNREIDK                       | 3     | 0.999      |           |
| E1B7T1 | E1B7T1_BOVIN | BL77420   | Uncharacterized protein                                  | 1.000 | 1.4                |                                        |       | 2,562,417  | 492,578   |
| E1B7U3 | E1B7U3_BOVIN | Bt.16440  | Uncharacterized protein                                  | 0.999 |                    | PATSPKPLPSPKPSASP                      | 3     | 0.999      |           |
| E1B7V8 | E1B7V8_BOVIN | PLEKHA4   | Uncharacterized protein                                  | 0.999 | 2.5                |                                        |       | 2,348,573  | 331,629   |
| E1B7V9 | E1B7V9_BOVIN | MAG11     | Uncharacterized protein (Fragment)                       | 0.999 |                    | IVQSSSPSSSDGK                          | 3     | 0.999      |           |
| E1B7X4 | E1B7X4_BOVIN | SERTAD4   | Uncharacterized protein                                  | 0.999 |                    | SQAQAQLEVEKALEEK                       | 3     | 0.999      |           |
| E1B7Z7 | E1B7Z7_BOVIN | OR2G2     | Uncharacterized protein                                  | 0.999 | 4.0                |                                        |       | 2,218,408  | 376,233   |
| E1B9Y8 | E1B9Y8_BOVIN | OR2G2     | Uncharacterized protein                                  | 0.999 |                    | AQEQDVPVGCSCVHISCSAASRDEASLSR          | 3     | 0.999      |           |
| E1B800 | E1B800_BOVIN | RASAL2    | Uncharacterized protein                                  | 0.999 | 1.4                |                                        |       | 639,830    | 115,396   |
| E1B801 | E1B801_BOVIN | GRLF1     | Uncharacterized protein                                  | 1.000 | 1.4                |                                        |       | 639,830    | 115,396   |
| E1B802 | E1B802_BOVIN | Bt.1523   | Uncharacterized protein                                  | 0.999 |                    | ISGAIPPLPKTDSVCYAK                     | 3     | 0.999      |           |
| Q1LZB5 | TOM40_BOVIN  | TOMM40    | Mitochondrial import receptor subunit TOM40 homolog      | 0.999 | 6.3                |                                        |       | 2,452,246  | 245,416   |
| E1B805 | E1B805_BOVIN |           | Uncharacterized protein (Fragment)                       | 0.999 |                    | VPRASLAAMTFQPTAKR                      | 3     | 0.999      |           |
| E1B810 | E1B810_BOVIN | RIN2      | Uncharacterized protein                                  | 0.999 | 1.5                |                                        |       | 6,150,354  | 1,508,235 |
| G3N1T3 | G3N1T3_BOVIN | Bt.106189 | Uncharacterized protein                                  | 0.999 |                    | AKSPISGSGGSHMSGTSSSTGGMK               | 3     | 0.999      |           |
| E1B812 | E1B812_BOVIN | Bt.106189 | Uncharacterized protein (Fragment)                       | 0.999 | 5.6                |                                        |       | 1,514,463  | 283,057   |
| E1B813 | E1B813_BOVIN | Bt.104596 | Uncharacterized protein                                  | 0.999 |                    | TPPCGHRYSGLVTLTHTSTSSQSQMAASTR         | 3     | 0.999      |           |
| F1MR79 | F1MR79_BOVIN | Bt.104596 | Uncharacterized protein                                  | 0.999 | 3.4                |                                        |       | 2,470,046  | 239,084   |
| E1B816 | E1B816_BOVIN | Bt.103678 | Uncharacterized protein                                  | 0.999 |                    | CFPLYHLIALTLNMMK                       | 3     | 0.999      |           |
| Q32538 | Q32538_BOVIN | GCLC      | Glutamate-cysteine ligase catalytic subun                | 0.999 | 57.4               |                                        |       | 5,120,428  | 1,164,381 |
| E1B834 | E1B834_BOVIN | CRNN      | Uncharacterized protein                                  | 0.999 |                    | RFANRVQPEPNDVDGAVSGSLETDLQSSGR         | 3     | 0.999      |           |
| E1B841 | E1B841_BOVIN | FOX1      | Uncharacterized protein                                  | 0.999 | 5.4                |                                        |       | 2,192,173  | 225,219   |
| E1B842 | E1B842_BOVIN | HIVEP2    | Uncharacterized protein                                  | 0.999 |                    | DSVSAAEVGTQYITFKGMSQTLNITVTPEKK        | 3     | 0.999      |           |
| E1B847 | E1B847_BOVIN | MAP3K1    | Uncharacterized protein                                  | 0.999 |                    | SPGLGTDSCPLPPSAHRPPASPTGLR             | 3     | 0.999      |           |
| E1B864 | E1B864_BOVIN | Bl.44454  | Uncharacterized protein                                  | 0.999 | 2.1                |                                        |       | 6,953,137  | 348,744   |
| E1B867 | E1B867_BOVIN | ADAM17    | Uncharacterized protein                                  | 0.999 |                    | KEEDVMASGTVK                           | 3     | 0.839      |           |
| E1B884 | E1B884_BOVIN | Bl.7490   | Uncharacterized protein                                  | 0.999 |                    | SECTQLHLNLEKEK                         | 3     | 0.999      |           |
| Q0VCR7 | C1TM_BOVIN   | MTHFD1L   | Monofunctional C1-tetrahydrofolate synthase, mitochondri | 0.999 | 3.1                |                                        |       | 2,452,440  | 683,767   |
| E1B8C2 | E1B8C2_BOVIN | Bl.17059  | Uncharacterized protein                                  | 0.999 |                    | APPKFAFKVLPPSSYAHPLPDGEDR              | 3     | 0.999      |           |
|        |              |           |                                                          |       | 1.8                |                                        |       | 2,999,228  | 412,119   |
|        |              |           |                                                          |       |                    | PTSPQPQTKVPLAR                         | 3     | 0.999      |           |
|        |              |           |                                                          |       | 2.8                |                                        |       | 6,185,408  | 1,250,264 |
|        |              |           |                                                          |       |                    | GFGFTVVGDEPDEFLQIK                     | 3     | 0.999      |           |
|        |              |           |                                                          |       |                    | LKVGDRILAVNGCSITNK                     | 3     | 0.999      |           |
|        |              |           |                                                          |       |                    | GAGPPLAGSHYRGISNPITTSK                 | 3     | 0.999      |           |
|        |              |           |                                                          |       |                    | 10.2                                   |       | 963,543    | 266,570   |
|        |              |           |                                                          |       |                    | 11.0                                   |       | 963,543    | 266,570   |
|        |              |           |                                                          |       |                    |                                        |       |            |           |
|        |              |           |                                                          |       |                    | SITYGGCVQLVYSLALSGSTECVLLAVMSYDR       | 3     | 0.999      |           |
|        |              |           |                                                          |       |                    | 2.6                                    |       | 6,349,734  | 1,002,686 |
|        |              |           |                                                          |       |                    | ALYESDENCEVDPKSCSSSELLDHQSNLK          | 3     | 0.999      |           |
|        |              |           |                                                          |       |                    | 1.7                                    |       | 742,929    | 92,092    |
|        |              |           |                                                          |       |                    | IPTYNISVGLSGTEKEKGCQIGIK               | 3     | 0.999      |           |
|        |              |           |                                                          |       |                    | 8.9                                    |       | 3,516,167  | 334,813   |
|        |              |           |                                                          |       |                    | 8.9                                    |       | 3,516,167  | 334,813   |
|        |              |           |                                                          |       |                    |                                        |       |            |           |
|        |              |           |                                                          |       |                    | GLSNHFQVNHVIALSTIGESNYHFGVTVYGTGK      | 3     | 0.999      |           |
|        |              |           |                                                          |       |                    | 3.4                                    |       | 4,977,099  | 694,887   |
|        |              |           |                                                          |       |                    |                                        |       |            |           |
|        |              |           |                                                          |       |                    | GTGQDPVLPVADSLVDNDKCOEKLK              | 3     | 0.999      |           |
|        |              |           |                                                          |       |                    | NHGSVFASITIDVTSKMLPSFR                 | 3     | 0.999      |           |
|        |              |           |                                                          |       |                    | NHGSVFASITIDVTSKMLPSFRILAFYLLPK        | 3     | 0.999      |           |
|        |              |           |                                                          |       |                    | 2.8                                    |       | 2,054,771  | 435,717   |
|        |              |           |                                                          |       |                    | EFAIKESTYFSLGSGISFADLFR                | 3     | 0.999      |           |
|        |              |           |                                                          |       |                    | 4.5                                    |       | 746,965    | 110,000   |
|        |              |           |                                                          |       |                    | 5.6                                    |       | 746,965    | 110,000   |
|        |              |           |                                                          |       |                    |                                        |       |            |           |
|        |              |           |                                                          |       |                    | YSNYTPSAQYSQAYYPTAVLQCCSPPTR           | 3     | 0.999      |           |
|        |              |           |                                                          |       |                    | 1.7                                    |       | 1,534,583  | 190,654   |
|        |              |           |                                                          |       |                    | 2.2                                    |       | 1,534,583  | 190,654   |
|        |              |           |                                                          |       |                    |                                        |       |            |           |
|        |              |           |                                                          |       |                    | GGARYSQTGMSLKLRL                       | 3     | 0.999      |           |
|        |              |           |                                                          |       |                    | 2.4                                    |       | 2,342,381  | 1,275,721 |
|        |              |           |                                                          |       |                    | 2.5                                    |       | 2,342,381  | 1,275,721 |
|        |              |           |                                                          |       |                    |                                        |       |            |           |
|        |              |           |                                                          |       |                    | VILSYKLDFLIPLSK                        | 3     | 0.999      |           |
|        |              |           |                                                          |       |                    | 9.3                                    |       | 2,095,820  | 171,716   |
|        |              |           |                                                          |       |                    | 7.8                                    |       | 2,095,820  | 171,716   |
|        |              |           |                                                          |       |                    |                                        |       |            |           |
|        |              |           |                                                          |       |                    | ETVIRRDQGSLLHASVPSAQGR                 | 3     | 0.999      |           |
|        |              |           |                                                          |       |                    | GQTRHTRGAGEQGGPQRQSGSSQR               | 3     | 0.999      |           |
|        |              |           |                                                          |       |                    | 2.4                                    |       | 785,359    | 137,965   |
|        |              |           |                                                          |       |                    | VPLPLAASLSELAHRSKR                     | 3     | 0.999      |           |
|        |              |           |                                                          |       |                    | 2.3                                    |       | 6,373,838  | 1,187,769 |
|        |              |           |                                                          |       |                    | ALYHNPPLSMGQYLOAEPIVLGPPNLR            | 3     | 0.999      |           |
|        |              |           |                                                          |       |                    | TLVTNAAMGGIFNIAQLVGHAGLEK              | 3     | 0.999      |           |
|        |              |           |                                                          |       |                    | 1.9                                    |       | 1,856,245  | 88,104    |
|        |              |           |                                                          |       |                    | CDDSGSSNSNSNAVIPSDETVFVPEEK            | 3     | 0.999      |           |
|        |              |           |                                                          |       |                    | 1.1                                    |       | 364,085    | 36,831    |
|        |              |           |                                                          |       |                    | DELDRNVMTQVSSPPPPR                     | 3     | 0.999      |           |
|        |              |           |                                                          |       |                    | 3.8                                    |       | 449,927    | 59,012    |
|        |              |           |                                                          |       |                    | VVVVDGKDEREYPSWCLGALHTVEGEPDSR         | 3     | 0.999      |           |
|        |              |           |                                                          |       |                    | 4.0                                    |       | 1,286,615  | 238,947   |
|        |              |           |                                                          |       |                    | 3.9                                    |       | 1,286,615  | 238,947   |
|        |              |           |                                                          |       |                    |                                        |       |            |           |
|        |              |           |                                                          |       |                    | GPSPAPPARDSIVREVIONS                   | 3     | 0.999      |           |
|        |              |           |                                                          |       |                    | YVLVAGITPTPLGEGK                       | 3     | 0.999      |           |
|        |              |           |                                                          |       |                    | 2.0                                    |       | 8,011,587  | 348,821   |
|        |              |           |                                                          |       |                    |                                        |       |            |           |
|        |              |           |                                                          |       |                    | SLPLSLKVVFESELDK                       | 3     | 0.999      |           |

|        |              |              |                                    |       |                                 |   |       |             |            |
|--------|--------------|--------------|------------------------------------|-------|---------------------------------|---|-------|-------------|------------|
| E1B8C8 | E1B8C8_BOVIN | FEZF1        | Uncharacterized protein            | 0.999 | 4.4                             |   |       | 1,298,434   | 203,423    |
| E1B8D6 | E1B8D6_BOVIN | Bt.65211     | Uncharacterized protein            | 0.999 | DLSQLQQLHYMKESAQLLSEK           | 3 | 0.999 | 1,757,827   | 500,722    |
| E1B8E3 | E1B8E3_BOVIN | Bt.64919     | Uncharacterized protein            | 0.999 | NHDHKMEKLGGLDDESNQAAATQSPGDSR   | 3 | 0.999 | 3,115,613   | 572,771    |
| E1B8E7 | E1B8E7_BOVIN | HTT          | Uncharacterized protein            | 0.999 | 7.9                             |   |       | 1,350,475   | 272,302    |
| E1B8G2 | E1B8G2_BOVIN | PTX4         | Uncharacterized protein            | 0.999 | GHCELVNKLEAGAAVDRDLLDR          | 3 | 0.999 | 9,619,171   | 711,925    |
| E1B8G6 | E1B8G6_BOVIN | PODXL2       | Uncharacterized protein            | 0.999 | 0.8                             |   |       | 5,461,175   | 385,872    |
| E1B8H0 | E1B8H0_BOVIN | Bt.65579     | Uncharacterized protein            | 0.999 | NLPEETFARFLLQLVGLLEDIVTK        | 3 | 0.999 | 18,592,620  | 2,640,173  |
| E1B8H1 | E1B8H1_BOVIN | LOC784932    | Uncharacterized protein            | 1.000 | 2.2                             |   |       | 13,260,931  | 1,215,510  |
| E1B8H4 | E1B8H4_BOVIN | DENND2A      | Uncharacterized protein            | 0.999 | PAIVFMYRCPDAGQGLSMDQGK          | 3 | 0.999 | 1,018,429   | 106,066    |
| E1B8H7 | E1B8H7_BOVIN | VTCN1        | Uncharacterized protein            | 0.999 | QSEPNYEGLLSGNDQEK               | 3 | 0.829 | 2,880,613   | 267,182    |
| E1B8H8 | E1B8H8_BOVIN | SEC14L3      | Uncharacterized protein            | 0.999 | 7.9                             |   |       | 211,391     | 21,379     |
| E1B8J6 | E1B8J6_BOVIN | Bt.25003     | Uncharacterized protein            | 0.999 | HIDELSLPR                       | 2 | 0.999 | 5,101,425   | 522,520    |
| E1B8J7 | E1B8J7_BOVIN | Bt.105562    | Uncharacterized protein            | 0.999 | LINIEYVK                        | 2 | 0.982 | 852,963     | 161,428    |
| E1B8K3 | E1B8K3_BOVIN | OC90         | Uncharacterized protein            | 0.999 | TPFNPNTHYESEFHVSK               | 3 | 0.980 | 522,859     | 116,063    |
| G3N1Y4 | G3N1Y4_BOVIN | OC90         | Uncharacterized protein            | 0.999 | 2.4                             |   |       | 522,859     | 116,063    |
| E1B8K8 | E1B8K8_BOVIN | LOC100140212 | Uncharacterized protein            | 0.999 | KCVLNFPGSPTSSIPDTPAKQSLSK       | 3 | 0.999 | 1,550,248   | 327,620    |
| E1BEJ6 | E1BEJ6_BOVIN | LOC100140212 | Uncharacterized protein            | 0.999 | 7.4                             |   |       | 1,550,248   | 327,620    |
| E1B8L3 | E1B8L3_BOVIN | IL17RE       | Uncharacterized protein            | 0.914 | LADIWIWLKEGVMGLVHEFK            | 3 | 0.999 | 13,133,075  | 1,336,525  |
| E1B8L6 | E1B8L6_BOVIN | Bt.4662      | Nitric oxide synthase              | 0.999 | 5.3                             |   |       | 1,362,742   | 97,504     |
| F1MY54 | F1MY54_BOVIN | Bt.4662      | Nitric oxide synthase              | 0.999 | 3.2                             |   |       | 1,362,742   | 97,504     |
| P29473 | NOS3_BOVIN   | NOS3         | Nitric oxide synthase, endothelial | 0.999 | 3.2                             |   |       | 1,362,742   | 97,504     |
| E1B8M7 | E1B8M7_BOVIN | Bt.48219     | Uncharacterized protein            | 0.999 | DEVDQAQERGVFGRVLTAFSR           | 3 | 0.999 | 17,193,004  | 3,446,737  |
| E1B8N1 | E1B8N1_BOVIN | LOC521092    | Uncharacterized protein            | 0.999 | LQEVAAEVASTGYHLR                | 3 | 0.999 | 1,759,446   | 83,538     |
| E1B8N5 | E1B8N5_BOVIN | Bt.106410    | Uncharacterized protein            | 0.999 | 2.2                             |   |       | 2,341,929   | 918,213    |
| E1B8Q9 | E1B8Q9_BOVIN | IPO8         | Uncharacterized protein            | 0.999 | TPEIGTSKWNLNQK                  | 3 | 0.999 | 3,741,117   | 601,680    |
| E1B8R7 | E1B8R7_BOVIN | HPS5         | Uncharacterized protein            | 0.999 | SSVGLSETSQEVGRMSPITVDDSDSR      | 3 | 0.999 | 4,412,879   | 358,118    |
| E1B8R8 | E1B8R8_BOVIN | Bt.23781     | Uncharacterized protein (Fragment) | 0.999 | 2.3                             |   |       | 3,414,613   | 391,484    |
| E1B8T3 | E1B8T3_BOVIN | Bt.44586     | Uncharacterized protein            | 0.999 | DFSGISDTGSSSVESNQDMLLDES        | 3 | 0.999 | 4,139,913   | 330,486    |
| E1B8V3 | E1B8V3_BOVIN | Bt.61053     | Uncharacterized protein            | 0.999 | DSFCHQMSFCTELHLWLSK             | 3 | 0.999 | 1,177,466   | 388,934    |
| E1BK64 | E1BK64_BOVIN | DFNB59       | Uncharacterized protein            | 0.999 | 1.4                             |   |       | 1,177,466   | 388,934    |
| E1B8W0 | E1B8W0_BOVIN | Bt.3361      | Uncharacterized protein            | 0.937 | DLPSPDRNCPAVTLTSPAKTK           | 3 | 0.999 | 1,407,122   | 156,658    |
| E1B8W2 | E1B8W2_BOVIN | KLRG1        | Uncharacterized protein            | 0.999 | 11.5                            |   |       | 8,155,538   | 397,425    |
| E1B8X8 | E1B8X8_BOVIN | BRCA2        | Uncharacterized protein            | 0.956 | 6.5                             |   |       | 7,545,517   | 1,172,346  |
| E1B8Z3 | E1B8Z3_BOVIN | DAAM2        | Uncharacterized protein            | 0.986 | SFVKQVGGDGRVLPVPSLSEADK         | 3 | 0.999 | 5,260,549   | 809,023    |
| E1B901 | E1B901_BOVIN | LAIR1        | Uncharacterized protein            | 0.999 | 0.8                             |   |       | 444,027     | 52,149     |
| E1B905 | E1B905_BOVIN | KCTD16       | Uncharacterized protein            | 0.999 | SLPPAPESESSP                    | 3 | 0.856 | 144,014,184 | 52,107,867 |
| E1B914 | E1B914_BOVIN |              | Uncharacterized protein            | 0.999 | 15.4                            |   |       | 2,087,918   | 270,113    |
| E1B925 | E1B925_BOVIN | Bt.21378     | Uncharacterized protein (Fragment) | 0.999 | SPRSYHVAIAGLLSTILASMLLQWLYR     | 3 | 0.999 | 4,014,411   | 618,560    |
| E1B928 | E1B928_BOVIN | Bt.41892     | Uncharacterized protein (Fragment) | 0.999 | 0.6                             |   |       | 3,155,050   | 195,110    |
| E1B935 | E1B935_BOVIN | Bt.11942     | Uncharacterized protein            | 0.999 | YISMEDNQETCVLNENSKK             | 3 | 0.895 | 3,324,986   | 270,882    |
| F1N6W9 | F1N6W9_BOVIN | COL18A1      | Uncharacterized protein            | 0.999 | 4.1                             |   |       | 3,324,986   | 270,882    |
| E1B944 | E1B944_BOVIN | IQCH         | Uncharacterized protein            | 0.999 | ELGSTEDIHLASRKVK                | 3 | 0.863 | 2,728,853   | 488,102    |
| E1B949 | E1B949_BOVIN | Bt.88173     | Uncharacterized protein            | 0.999 | FVPVMSDFITVSSFSFSELEDQLNEARAK   | 3 | 0.900 | 3,441,412   | 536,427    |
| E1B962 | E1B962_BOVIN | Bt.9351      | Uncharacterized protein            | 0.999 | 8.8                             |   |       | 919,107     | 115,901    |
| Q0VCU9 | Q0VCU9_BOVIN | TMC6         | Transmembrane channel-like f       | 0.999 | EDAVGRYHCLYQKESTWSALSEALR       | 3 | 0.999 | 919,107     | 115,901    |
| E1B965 | E1B965_BOVIN | GRM4         | Uncharacterized protein            | 0.999 | 6.1                             |   |       | 1,962,032   | 330,682    |
| E1B971 | E1B971_BOVIN | RPTN         | Uncharacterized protein            | 1.000 | EQGAAPVNSFPPEVVELNVGGQYVYFTR    | 3 | 0.999 | 8,524,474   | 756,095    |
| E1B987 | E1B987_BOVIN | ZDHHC22      | Uncharacterized protein            | 0.999 | 2.4                             |   |       | 13,059,446  | 3,882,903  |
| E1B990 | E1B990_BOVIN | Bt.29236     | Uncharacterized protein            | 1.000 | GGSVSVEALVMALFELLNTHAK          | 3 | 0.999 | 2,055,683   | 111,192    |
| Q29S21 | K2C7_BOVIN   | KRT7         | Keratin, type II cytoskeletal 7    | 1.000 | 2.8                             |   |       | 2,055,683   | 111,192    |
| E1B9A2 | E1B9A2_BOVIN | CARD6        | Uncharacterized protein            | 0.999 | IQPPSPAGSGSMQGPQTQSTSSSMAEGGDLK | 3 | 0.999 | 1,496,470   | 165,114    |
| E1B9B6 | E1B9B6_BOVIN | NUAK1        | Uncharacterized protein            | 0.999 | LLDISVSPLMNSLVQVCDVLFLLIGQS     | 3 | 0.999 | 2,911,723   | 419,813    |
| E1B9B7 | E1B9B7_BOVIN | Bt.36084     | L-lactate dehydrogenase            | 0.999 | 2.2                             |   |       | 1,079,911   | 104,569    |
| F1MK19 | F1MK19_BOVIN | LDHC         | L-lactate dehydrogenase            | 0.999 | ERNLQLIGSIRDFLQSDDDAR           | 3 | 0.999 | 1,079,911   | 104,569    |
| E1BNS9 | E1BNS9_BOVIN | LDHC         | Uncharacterized protein            | 0.999 | 2.9                             |   |       | 1,079,911   | 104,569    |
| E1B9D2 | E1B9D2_BOVIN | Bt.14401     | Uncharacterized protein            | 0.999 | EENIAGVGAKILNVAQGR              | 3 | 0.999 | 1,237,607   | 211,017    |
| E1B9D3 | E1B9D3_BOVIN | GPR179       | Uncharacterized protein            | 0.999 | PASARAGVLFVAIDPAQAVSVGVK        | 3 | 0.999 | 4,421,298   | 406,955    |
| E1B9F4 | E1B9F4_BOVIN | Bt.47932     | Uncharacterized protein            | 0.999 | 1.9                             |   |       | 6,862,458   | 1,120,030  |
| E1B9F5 | E1B9F5_BOVIN |              | Uncharacterized protein (Fragment) | 0.999 | QKWASGVIAIWLHCHKTR              | 3 | 0.999 | 2,126,059   | 425,953    |
| E1B9H2 | E1B9H2_BOVIN | Bt.103171    | Uncharacterized protein            | 0.999 | LDITLNPSSGEGAFHLVSKGGLDR        | 3 | 0.999 | 6,754,015   | 1,200,753  |
| G3X6B1 | G3X6B1_BOVIN | Bt.104452    | Uncharacterized protein            | 0.999 | 1.8                             |   |       | 1,476,743   | 396,453    |
| E1B9I2 | E1B9I2_BOVIN | Bt.106000    | Uncharacterized protein            | 0.999 | 1.8                             |   |       | 1,476,743   | 396,453    |

|        |              |            |                                                                                                  |       |                                                                                |   |       |            |           |
|--------|--------------|------------|--------------------------------------------------------------------------------------------------|-------|--------------------------------------------------------------------------------|---|-------|------------|-----------|
| E1BDE7 | E1BDE7_BOVIN | BL8079     | Uncharacterized protein                                                                          | 0.999 | 3.5                                                                            |   |       | 1,476,743  | 396,453   |
| E1B9I5 | E1B9I5_BOVIN | Bt.38822   | Uncharacterized protein                                                                          | 0.999 | ASEHTEACSEEAEEAPPEASSDPGDSKEDVKK                                               | 3 | 0.999 | 1,035,424  | 162,811   |
| E1B9J8 | E1B9J8_BOVIN | ZNF10      | Uncharacterized protein                                                                          | 0.999 | TQFPGFELPAPQPLITSRANIRHWINPK                                                   | 3 | 0.999 | 1,783,133  | 264,569   |
| E1B9K2 | E1B9K2_BOVIN | Bt.23129   | Uncharacterized protein                                                                          | 0.999 | 9.2                                                                            | 3 | 0.999 | 6,169,548  | 2,620,918 |
| Q0VCP3 | OLFL3_BOVIN  | OLFML3     | Olfactomedin-like protein 3                                                                      | 0.999 | 9.4                                                                            | 3 | 0.999 | 6,169,548  | 2,620,918 |
| E1B9K4 | E1B9K4_BOVIN | HMCN2      | Uncharacterized protein                                                                          | 0.990 | EVDYLETQNPALPCVEVDEK<br>YDMITDCGYTISQVRSMK                                     | 3 | 0.999 | 8,810,253  | 647,226   |
| E1BDX4 | E1BDX4_BOVIN | LOC512915  | Uncharacterized protein                                                                          | 0.999 | 1.4                                                                            | 3 | 0.876 |            |           |
| E1B9L1 | E1B9L1_BOVIN | ZBTB17     | Uncharacterized protein                                                                          | 0.999 | EGLSVFAGAGTQVLPGGQLR<br>PPLVEGWGGSSLRGEPAAATHLLLSPIQIEK<br>SALLAGRATGHPPLTTWHR | 3 | 0.841 | 1,391,377  | 150,592   |
| E1B9M5 | E1B9M5_BOVIN | BAI2       | Uncharacterized protein                                                                          | 0.999 | 3.2                                                                            | 3 | 0.999 | 1,391,377  | 150,592   |
| E1B9M8 | E1B9M8_BOVIN | Bt.36098   | Uncharacterized protein                                                                          | 0.999 | AFVNVGDLKSHIIHTGEKPYLCKD                                                       | 3 | 0.999 | 5,399,104  | 2,617,741 |
| E1B9P0 | E1B9P0_BOVIN | OR4D5      | Uncharacterized protein                                                                          | 0.999 | 1.4                                                                            | 3 | 0.999 | 339,288    | 33,702    |
| E1BGW8 | E1BGW8_BOVIN | OR4D5      | Uncharacterized protein                                                                          | 0.999 | RTLSLQGGGGGGGEGDPPRAR                                                          | 3 | 0.999 | 517,240    | 66,936    |
| E1BEI5 | E1BEI5_BOVIN | OR4D5      | Uncharacterized protein (Fragment)                                                               | 0.999 | 2.4                                                                            | 3 | 0.999 | 517,240    | 66,936    |
| E1B9R5 | E1B9R5_BOVIN | Bt.100108  | Uncharacterized protein                                                                          | 1.000 | RWGARGEHACQCOHGACHPR                                                           | 3 | 0.999 | 517,240    | 66,936    |
| G3N309 | G3N309_BOVIN | Bt.100108  | Uncharacterized protein (Fragment)                                                               | 1.000 | 9.0                                                                            | 3 | 0.999 | 7,092,181  | 2,228,210 |
| E1B9T3 | E1B9T3_BOVIN | Bt.65020   | Uncharacterized protein                                                                          | 0.999 | 1.0                                                                            | 3 | 0.999 | 7,092,181  | 2,228,210 |
| Q0IIK7 | Q0IIK7_BOVIN | GALNTL4    | UDP-N-acetyl-alpha-D-galactosamine:polypeptide N-acetylgalactosaminyl transferase 4              | 0.999 | 1.0                                                                            | 3 | 0.999 | 905,794    | 116,246   |
| E1B9X0 | E1B9X0_BOVIN | Bt.44059   | Uncharacterized protein                                                                          | 0.999 | 2.2                                                                            | 3 | 0.999 | 905,794    | 116,246   |
| E1B9X1 | E1B9X1_BOVIN | Bt.103121  | Uncharacterized protein                                                                          | 0.957 | 2.1                                                                            | 3 | 0.999 | 1,106,816  | 128,032   |
| E1B9Z9 | E1B9Z9_BOVIN | TMPPRS9    | Uncharacterized protein                                                                          | 0.999 | VNGQKPGFIKVV                                                                   | 3 | 0.999 | 2,357,538  | 172,185   |
| E1BA03 | E1BA03_BOVIN | PAK6       | Uncharacterized protein                                                                          | 1.000 | 1.6                                                                            | 3 | 0.999 | 723,545    | 168,260   |
| E1BA11 | E1BA11_BOVIN | FAM184A    | Uncharacterized protein (Fragment)                                                               | 0.999 | 1.3                                                                            | 3 | 0.999 | 2,172,425  | 169,445   |
| E1BA17 | E1BA17_BOVIN | Bt.56329   | Uncharacterized protein                                                                          | 0.999 | PCSGTDSGISDAMEELEEAAHQKCPWWYK                                                  | 3 | 0.834 | 1,187,447  | 257,149   |
| E1BA24 | E1BA24_BOVIN | SAAL1      | Uncharacterized protein                                                                          | 0.999 | 3.3                                                                            | 3 | 0.999 | 6,868,455  | 1,959,878 |
| E1BA36 | E1BA36_BOVIN | Bt.70978   | Uncharacterized protein                                                                          | 0.999 | ELGLTGKVGKEGKNGPGTQGPR<br>KIEDELITFVCETASATCPLVHK                              | 3 | 0.999 | 1,727,274  | 164,759   |
| E1BA44 | E1BA44_BOVIN | LTPB4      | Uncharacterized protein                                                                          | 0.999 | 2.0                                                                            | 3 | 0.999 | 654,210    | 119,223   |
| G3MZT8 | G3MZT8_BOVIN | LTPB4      | Uncharacterized protein                                                                          | 0.999 | 1.4                                                                            | 3 | 0.999 | 707,838    | 200,196   |
| E1BA54 | E1BA54_BOVIN | LOC785969  | Uncharacterized protein                                                                          | 0.999 | 1.9                                                                            | 3 | 0.999 | 707,838    | 200,196   |
| F1MB74 | F1MB74_BOVIN | LOC785969  | Uncharacterized protein (Fragment)                                                               | 0.999 | TPGPPFGTQIWKGLDIGSKQLVNTAPILK                                                  | 3 | 0.999 | 1,147,907  | 205,646   |
| E1BA65 | E1BA65_BOVIN | Bt.38732   | Uncharacterized protein (Fragment)                                                               | 1.000 | 1.9                                                                            | 3 | 0.999 | 1,147,907  | 205,646   |
| E1BA70 | E1BA70_BOVIN | C9ORF3     | Uncharacterized protein                                                                          | 0.999 | SEAAAPYTVLAQSAAPREDGYSASFGYCFR                                                 | 3 | 0.999 | 4,110,058  | 494,155   |
| E1BA80 | E1BA80_BOVIN | Bt.89517   | Uncharacterized protein                                                                          | 0.989 | 8.9                                                                            | 3 | 0.999 | 5,308,929  | 402,132   |
| E1BA88 | E1BA88_BOVIN | LOC784533  | Uncharacterized protein                                                                          | 0.999 | 6.8                                                                            | 3 | 0.999 | 9,828,208  | 548,405   |
| E1BA96 | E1BA96_BOVIN | Bt.53553   | Uncharacterized protein (Fragment)                                                               | 0.999 | 1.6                                                                            | 2 | 0.940 | 7,387,871  | 493,005   |
| E1BA99 | E1BA99_BOVIN | Bt.50538   | Uncharacterized protein                                                                          | 0.999 | 1.6                                                                            | 3 | 0.816 | 2,724,980  | 769,601   |
| E1BAA5 | E1BAA5_BOVIN | Bt.53895   | Uncharacterized protein                                                                          | 0.999 | 6.6                                                                            | 3 | 0.999 | 3,469,675  | 777,812   |
| E1BAA9 | E1BAA9_BOVIN | DUSP16     | Uncharacterized protein                                                                          | 0.999 | EGTISGGSPSEISNSNSQSNR                                                          | 3 | 0.999 | 2,918,761  | 402,573   |
| E1BAC5 | E1BAC5_BOVIN | NKX2-8     | Uncharacterized protein                                                                          | 0.999 | 3.0                                                                            | 3 | 0.999 | 2,479,150  | 1,104,667 |
| E1BAD7 | E1BAD7_BOVIN | SIX5       | Uncharacterized protein                                                                          | 0.999 | GGSLSLAEVAGELDRETLQR<br>SPAGGSAQAWNRGSSLSLAEVAGELDRETLQR                       | 3 | 0.999 | 1,567,335  | 290,979   |
| E1BAF6 | E1BAF6_BOVIN | Bt.7325    | Uncharacterized protein                                                                          | 0.999 | 4.6                                                                            | 3 | 0.999 | 1,378,312  | 279,195   |
| E1BAH9 | E1BAH9_BOVIN | Bt.4538    | Guanylate cyclase                                                                                | 0.957 | 6.6                                                                            | 3 | 0.869 | 1,919,827  | 357,548   |
| F1NSB2 | F1NSB2_BOVIN | GUCY2C     | Guanylate cyclase                                                                                | 0.957 | 1.0                                                                            | 3 | 0.999 | 703,774    | 89,032    |
| E1BAI1 | E1BAI1_BOVIN | Bt.61762   | Uncharacterized protein                                                                          | 0.999 | 3.3                                                                            | 3 | 0.957 | 703,774    | 89,032    |
| E1BBU5 | E1BBU5_BOVIN | Bt.61762   | Uncharacterized protein                                                                          | 0.999 | 3.4                                                                            | 3 | 0.999 | 1,883,450  | 138,121   |
| E1BAI5 | E1BAI5_BOVIN | SEN2       | Uncharacterized protein                                                                          | 0.999 | 3.4                                                                            | 3 | 0.999 | 1,883,450  | 138,121   |
| E1BAK4 | E1BAK4_BOVIN | DOPEY2     | Uncharacterized protein                                                                          | 0.999 | 1.9                                                                            | 3 | 0.999 | 24,571,342 | 4,900,563 |
| F1N750 | F1N750_BOVIN | Bt.50011   | Uncharacterized protein (Fragment)                                                               | 0.999 | 1.0                                                                            | 3 | 0.999 | 3,794,667  | 402,478   |
| E1BAK5 | E1BAK5_BOVIN | CENPC1     | Uncharacterized protein                                                                          | 0.999 | 2.6                                                                            | 3 | 0.999 | 3,027,206  | 401,386   |
| E1BAL6 | E1BAL6_BOVIN | EIF2AK4    | Uncharacterized protein                                                                          | 0.999 | 2.5                                                                            | 3 | 0.999 | 3,027,206  | 401,386   |
| E1BAL7 | E1BAL7_BOVIN |            | Uncharacterized protein                                                                          | 0.999 | 1.0                                                                            | 3 | 0.999 | 17,084,829 | 2,539,157 |
| E1BAN3 | E1BAN3_BOVIN | TRPV6      | Uncharacterized protein                                                                          | 0.999 | 5.8                                                                            | 3 | 0.999 | 8,180,617  | 438,591   |
| P11179 | ODO2_BOVIN   | DLST       | Dihydrolipoylysine-residue succinyltransferase component of 2-oxoglutarate dehydrogenase complex | 0.999 | 4.3                                                                            | 3 | 0.999 | 1,890,911  | 531,064   |
| E1BAP2 | E1BAP2_BOVIN | DLST       | Uncharacterized protein                                                                          | 0.999 | 7.3                                                                            | 3 | 0.999 | 6,526,840  | 928,773   |
| F1MEQ3 | F1MEQ3_BOVIN | DLST       | Uncharacterized protein                                                                          | 0.999 | 7.2                                                                            | 3 | 0.999 | 6,526,840  | 928,773   |
| E1BAQ0 | E1BAQ0_BOVIN | Bt.65168   | Uncharacterized protein                                                                          | 0.999 | 7.2                                                                            | 3 | 0.999 | 6,526,840  | 928,773   |
| Q04173 | GDS1_BOVIN   | RAP1GDS1   | Rap1 GTPase-GDP dissociation stimulator                                                          | 0.999 | 3.6                                                                            | 3 | 0.999 | 2,272,278  | 167,382   |
| F6RPT3 | F6RPT3_BOVIN | RAP1GDS1   | Uncharacterized protein (Fragment)                                                               | 0.999 | 3.9                                                                            | 3 | 0.999 | 2,272,278  | 167,382   |
| E1BAR2 | E1BAR2_BOVIN | Bt.42314   | Uncharacterized protein                                                                          | 0.999 | 4.0                                                                            | 3 | 0.999 | 2,272,278  | 167,382   |
| E1BAS6 | E1BAS6_BOVIN | Bt.103624  | Uncharacterized protein                                                                          | 0.999 | MLIDAQAEAEQLGKNVQLVER                                                          | 3 | 0.999 | 5,104,041  | 1,374,895 |
| E1BAT5 | E1BAT5_BOVIN | ANKRD11    | Uncharacterized protein                                                                          | 1.000 | 3.1                                                                            | 3 | 0.999 | 5,147,000  | 537,301   |
| E1BAU3 | E1BAU3_BOVIN | Bt.26774   | Uncharacterized protein (Fragment)                                                               | 1.000 | 3.1                                                                            | 3 | 0.999 | 14,660,870 | 1,424,907 |
| E1BAU4 | E1BAU4_BOVIN | PCDH17     | Uncharacterized protein                                                                          | 0.999 | 1.5                                                                            | 3 | 0.999 | 1,006,468  | 164,835   |
| E1BAY0 | E1BAY0_BOVIN | C11H2orf71 | Uncharacterized protein                                                                          | 0.999 | 1.5                                                                            | 3 | 0.999 | 12,106,267 | 5,210,567 |
| G3N2Z0 | G3N2Z0_BOVIN | C11H2orf71 | Uncharacterized protein                                                                          | 0.999 | 3.7                                                                            | 3 | 0.999 | 240,931    | 40,356    |
|        |              |            |                                                                                                  | 0.999 | 1.8                                                                            | 3 | 0.999 | 240,931    | 40,356    |
|        |              |            |                                                                                                  | 0.999 | 1.8                                                                            | 3 | 0.999 | 240,931    | 40,356    |
|        |              |            |                                                                                                  | 0.999 | TEAGSLASGSPSPASPSPGPK                                                          | 3 | 0.999 |            |           |



|        |              |             |                                                                      |       |                                     |   |       |             |            |
|--------|--------------|-------------|----------------------------------------------------------------------|-------|-------------------------------------|---|-------|-------------|------------|
| E1BC37 | E1BC37_BOVIN | Bl.105449   | Uncharacterized protein (Fragment)                                   | 1.000 | 1.0                                 |   |       | 5,763,421   | 315,102    |
| E1BC38 | E1BC38_BOVIN | CD248       | Uncharacterized protein                                              | 0.999 | SHDSDSDDYASSKHR                     | 3 | 0.999 | 4,720,529   | 380,614    |
| E1BC45 | E1BC45_BOVIN | AMMECR1L    | Uncharacterized protein                                              | 0.999 | EGALGPSLAPWSSAVPTSAPPALGEASPAGRSRR  | 3 | 0.999 | 450,065     | 47,604     |
| F1N4T8 | F1N4T8_BOVIN | Bt.92551    | Uncharacterized protein (Fragment)                                   | 0.999 | 6.1                                 |   |       | 450,065     | 47,604     |
| E1BC48 | E1BC48_BOVIN | CEP350      | Uncharacterized protein                                              | 1.000 | RLRGICIGTFSAMNLSHGLR                | 3 | 0.999 | 1,168,163   | 230,708    |
| E1BC55 | E1BC55_BOVIN | LOC533883   | Uncharacterized protein                                              | 0.999 | 0.9                                 |   |       | 12,241,361  | 3,038,915  |
| E1BC67 | E1BC67_BOVIN | PPP1R9A     | Uncharacterized protein                                              | 0.999 | SLLEEPTQHIMQEQTTRPGYQPSGESDK        | 3 | 0.999 | 2,700,081   | 138,225    |
| F6R8E7 | F6R8E7_BOVIN | PPP1R9A     | Uncharacterized protein                                              | 0.999 | 2.7                                 |   |       | 2,700,081   | 138,225    |
| E1BC79 | E1BC79_BOVIN | HAO1        | Uncharacterized protein (Fragment)                                   | 0.999 | NVSLFPKAAISQMPNPVIFESNK             | 3 | 0.999 | 3,117,738   | 300,047    |
| E1BC83 | E1BC83_BOVIN | Bl.17543    | Uncharacterized protein (Fragment)                                   | 0.999 | 1.1                                 |   |       | 727,702     | 130,189    |
| E1BC86 | E1BC86_BOVIN | Bl.37491    | Uncharacterized protein                                              | 1.000 | 1.7                                 |   |       | 4,725,553   | 601,898    |
| Q3B7N6 | Q3B7N6_BOVIN | ERCC5       | Excision repair cross-complementing rodent repair deficiency, comple | 0.999 | 2.6                                 |   |       | 958,233     | 92,362     |
| E1BC95 | E1BC95_BOVIN | ERCC5       | Uncharacterized protein (Fragment)                                   | 0.999 | 1.9                                 |   |       | 958,233     | 92,362     |
| E1BCC1 | E1BCC1_BOVIN | ARHGAP9     | Uncharacterized protein                                              | 0.999 | SSAAQSAQAASRRDDGGTTTSSSSDDDDGGGR    | 3 | 0.999 | 1,273,987   | 253,865    |
| E1BCC6 | E1BCC6_BOVIN | SKOR2       | Uncharacterized protein                                              | 0.999 | 2.1                                 |   |       | 298,665     | 39,167     |
| E1BCD1 | E1BCD1_BOVIN | LOC785114   | Uncharacterized protein                                              | 0.999 | TSELFDSQGSPLYCRR                    | 3 | 0.999 | 10,015,763  | 3,266,947  |
| E1BCD5 | E1BCD5_BOVIN | Bl.31396    | Uncharacterized protein                                              | 0.999 | 3.0                                 |   |       | 1,041,372   | 241,102    |
| E1BCE1 | E1BCE1_BOVIN | ATAD5       | Uncharacterized protein                                              | 0.999 | LLQEDGKLDGPGGPDLPPLPPPPPLASQK       | 3 | 0.999 | 11,026,304  | 510,474    |
| E1BCF0 | E1BCF0_BOVIN | PIBF1       | Uncharacterized protein                                              | 0.999 | 3.4                                 |   |       | 1,549,332   | 206,748    |
| E1BCG1 | E1BCG1_BOVIN | ABCA7       | Uncharacterized protein                                              | 0.999 | EDPDEAHLVAQNTAAQEAQISSEER           | 3 | 0.999 | 2,983,743   | 779,436    |
| E1BCG5 | E1BCG5_BOVIN | NDST1       | Uncharacterized protein                                              | 0.999 | 1.6                                 |   |       | 4,537,613   | 564,739    |
| E1BCH1 | E1BCH1_BOVIN | MAPKBP1     | Uncharacterized protein                                              | 0.999 | LSSQEKILGDLPTQPPGAAPDPSLPSTDSSER    | 3 | 0.999 | 3,123,088   | 346,150    |
| E1BCJ1 | E1BCJ1_BOVIN | ATP6V1B1    | Uncharacterized protein                                              | 0.999 | 1.8                                 |   |       | 1,624,185   | 165,418    |
| F31407 | F31407_BOVIN | ATP6V1B1    | V-type proton ATPase subunit B, kidney isoform                       | 0.999 | 9.8                                 |   |       | 1,624,185   | 165,418    |
| F1N688 | F1N688_BOVIN | Bl.4211     | Uncharacterized protein                                              | 0.999 | 9.8                                 |   |       | 1,624,185   | 165,418    |
| E1BCJ2 | E1BCJ2_BOVIN | CFHR5       | Uncharacterized protein                                              | 0.999 | GLPGGGASLGAAREHVQAVTRNYTHFR         | 3 | 0.999 | 7,816,950   | 656,146    |
| E1BCK2 | E1BCK2_BOVIN | C21H15orf39 | Uncharacterized protein                                              | 0.999 | 1.7                                 |   |       | 1,795,793   | 381,385    |
| E1BCP6 | E1BCP6_BOVIN | JAK2        | Tyrosine-protein kinase                                              | 0.999 | SCGQPPQLPNGMKKHR                    | 3 | 0.999 | 2,050,299   | 238,228    |
| E1BCP7 | E1BCP7_BOVIN | ALX4        | Uncharacterized protein                                              | 0.999 | 2.6                                 |   |       | 1,472,729   | 142,489    |
| E1BCR0 | E1BCR0_BOVIN | SHC4        | Uncharacterized protein                                              | 0.999 | FRSLLASAWNLGLALPTWGHKASGPRD         | 3 | 0.999 | 1,652,008   | 153,568    |
| E1BCR2 | E1BCR2_BOVIN | DIDO1       | Uncharacterized protein                                              | 0.923 | 2.3                                 |   |       | 3,829,950   | 398,381    |
| E1BCS3 | E1BCS3_BOVIN | HK3         | Uncharacterized protein                                              | 0.999 | 3.7                                 |   |       | 3,424,152   | 868,582    |
| E1BCU3 | E1BCU3_BOVIN | AASDH       | Uncharacterized protein                                              | 0.999 | ETVMLLAPNCDVSIPIPSVDGGGRGVAMVAVAAAR | 3 | 0.999 | 2,714,114   | 666,842    |
| E1BCY7 | E1BCY7_BOVIN | Bl.45696    | Uncharacterized protein                                              | 1.000 | 2.7                                 |   |       | 4,025,176   | 186,231    |
| E1BCZ2 | E1BCZ2_BOVIN | RBBP6       | Uncharacterized protein                                              | 0.999 | 3.3                                 |   |       | 979,266     | 182,323    |
| E1BCZ6 | E1BCZ6_BOVIN | MST1R       | Uncharacterized protein                                              | 0.999 | GPPSQQAPEAGGEEPSAGQGLGSRESRHR       | 3 | 0.999 | 12,108,550  | 1,231,797  |
| E1BCZ9 | E1BCZ9_BOVIN | ADNP        | Uncharacterized protein                                              | 0.999 | VGCLPPPPRLHPRPESDR                  | 3 | 0.999 | 5,854,890   | 1,380,139  |
| E1BD03 | E1BD03_BOVIN | PPM1D       | Uncharacterized protein                                              | 0.999 | 1.3                                 |   |       | 822,618     | 149,115    |
| E1BD09 | E1BD09_BOVIN | PLA2G4E     | Uncharacterized protein                                              | 0.999 | FSSKLNVDYVDFDGLHSLCDLK              | 3 | 0.999 | 1,462,950   | 161,148    |
| F1MFC1 | F1MFC1_BOVIN | PLA2G4E     | Uncharacterized protein (Fragment)                                   | 0.999 | 3.5                                 |   |       | 1,462,950   | 161,148    |
| E1BD15 | E1BD15_BOVIN | EYA4        | Uncharacterized protein (Fragment)                                   | 0.999 | APGVERSPEELQGOVDIYGPKPYATIK         | 3 | 0.999 | 119,097,582 | 43,017,357 |
| E1BD40 | E1BD40_BOVIN | PCDHGB1     | Uncharacterized protein                                              | 0.999 | 3.9                                 |   |       | 589,682     | 133,958    |
| E1BD46 | E1BD46_BOVIN | PADI3       | Uncharacterized protein                                              | 0.999 | VFVWDLDETIHFHSLLTGSYAQK             | 3 | 0.999 | 2,720,333   | 418,353    |
| E1BD67 | E1BD67_BOVIN | SAAL1       | Uncharacterized protein                                              | 0.999 | 3.2                                 |   |       | 6,011,046   | 910,703    |
| E1BD72 | E1BD72_BOVIN | TUSC2       | Uncharacterized protein                                              | 0.999 | 3.6                                 |   |       | 1,538,949   | 154,823    |
| E1BD77 | E1BD77_BOVIN | ZFHX2       | Uncharacterized protein                                              | 1.000 | 24.6                                |   |       | 4,856,034   | 669,223    |
| E1BD97 | E1BD97_BOVIN | Bl.8348     | Uncharacterized protein (Fragment)                                   | 0.999 | 2.3                                 |   |       | 10,022,231  | 3,081,717  |
| E1BDA9 | E1BDA9_BOVIN | BZRAP1      | Uncharacterized protein                                              | 1.000 | EGGTLPALGGSPEDPGDPAQPYR             | 3 | 0.999 | 5,144,904   | 622,531    |
| E1BDC5 | E1BDC5_BOVIN | KCNB1       | Uncharacterized protein                                              | 0.999 | 2.6                                 |   |       | 1,973,225   | 516,975    |
| E1BDC7 | E1BDC7_BOVIN | SYNPO2L     | Uncharacterized protein                                              | 0.999 | 3.0                                 |   |       | 2,323,378   | 485,787    |
| Q3B7M1 | Q3B7M1_BOVIN | KLHL36      | Kelch-like protein 36                                                | 0.999 | EELEMESIPSPVAPLPRTRTEGVIDMR         | 3 | 0.999 | 1,202,856   | 218,990    |
| E1BDD0 | E1BDD0_BOVIN | KLHL36      | Uncharacterized protein                                              | 0.999 | 4.8                                 |   |       | 1,202,856   | 218,990    |
| E1BDD4 | E1BDD4_BOVIN | LOC514057   | Uncharacterized protein                                              | 0.999 | MGAAEEVLTLSGGAPWGFRHGGAEQRK         | 3 | 0.999 | 104,798,246 | 2,706,655  |
| G3N1M3 | G3N1M3_BOVIN | LOC514057   | Uncharacterized protein                                              | 0.999 | 7.8                                 |   |       | 104,798,246 | 2,706,655  |
| E1BDD8 | E1BDD8_BOVIN | MFSD7       | Uncharacterized protein                                              | 0.999 | 3.5                                 |   |       | 19,426,320  | 553,946    |
| E1BDE1 | E1BDE1_BOVIN | Bl.39392    | Uncharacterized protein                                              | 0.999 | 3.5                                 |   |       | 3,677,688   | 304,112    |
| E1BDF3 | E1BDF3_BOVIN | Bl.56517    | Uncharacterized protein                                              | 0.999 | 2.6                                 |   |       | 3,981,879   | 300,621    |
| E1BDG2 | E1BDG2_BOVIN | SNX31       | Uncharacterized protein                                              | 0.999 | EFFPLHDLGLKPREPACR                  | 3 | 0.999 | 6,450,033   | 616,577    |
| E1BDG5 | E1BDG5_BOVIN | WNT5A       | Protein Wnt                                                          | 0.999 | 5.0                                 |   |       | 1,289,608   | 141,034    |
| F1MP15 | F1MP15_BOVIN | WNT5B       | Uncharacterized protein (Fragment)                                   | 0.999 | 3.0                                 |   |       | 1,289,608   | 141,034    |
| E1BDG6 | E1BDG6_BOVIN | RAB11FIP4   | Uncharacterized protein                                              | 0.999 | 2.9                                 |   |       | 3,253,679   | 964,894    |
| E1BDH2 | E1BDH2_BOVIN | ZMYND17     | Uncharacterized protein                                              | 0.999 | 3.2                                 |   |       | 1,846,359   | 341,573    |
|        |              |             |                                                                      |       | 4.4                                 |   |       |             |            |
|        |              |             |                                                                      |       | 4.4                                 |   |       |             |            |





|        |              |           |                                          |       |  |                                  |   |       |            |           |
|--------|--------------|-----------|------------------------------------------|-------|--|----------------------------------|---|-------|------------|-----------|
| E1BEW9 | E1BEW9_BOVIN | WDR87     | Uncharacterized protein                  | 1.000 |  | 1.0                              |   |       | 7,959,594  | 1,180,144 |
|        |              |           |                                          |       |  | ETFREMQEQEMVGEDETLDR             | 3 | 0.999 |            |           |
|        |              |           |                                          |       |  | LPGEEEKTEKR                      | 3 | 0.999 |            |           |
| E1BEZ0 | E1BEZ0_BOVIN | MORC1     | Uncharacterized protein                  | 0.999 |  | 1.5                              |   |       | 1,926,200  | 166,154   |
| F1MT71 | F1MT71_BOVIN | MORC1     | Uncharacterized protein (Fragment)       | 0.999 |  | 1.6                              |   |       | 1,926,200  | 166,154   |
| E1BEZ6 | E1BEZ6_BOVIN | Bt.66179  | Uncharacterized protein                  | 0.999 |  | RAVNVESLQCEKK                    | 3 | 0.999 |            |           |
|        |              |           |                                          |       |  | 2.9                              |   |       | 661,843    | 60,540    |
| E1BF06 | E1BF06_BOVIN | TNFSF15   | Uncharacterized protein                  | 0.999 |  | NDDQVPKLLYLLTTNESHIFMTCHK        | 3 | 0.999 |            |           |
|        |              |           |                                          |       |  | 10.6                             |   |       | 3,948,613  | 568,132   |
| E1BF14 | E1BF14_BOVIN | POP1      | Uncharacterized protein                  | 0.999 |  | NRMNNTKFLVIPESGDYFVYSQVTFR       | 3 | 0.999 |            |           |
|        |              |           |                                          |       |  | 3.2                              |   |       | 5,872,904  | 1,732,124 |
| E1BF29 | E1BF29_BOVIN | KIF11     | Uncharacterized protein                  | 0.999 |  | ALSSMCSIDTLGLFAAVHCLSGKCGQGVMLYR | 3 | 0.999 |            |           |
|        |              |           |                                          |       |  | 1.1                              |   |       | 222,588    | 29,624    |
| E1BF32 | E1BF32_BOVIN | LOC512493 | Uncharacterized protein                  | 0.999 |  | SHSVFSVTIHK                      | 3 | 0.999 |            |           |
|        |              |           |                                          |       |  | 2.8                              |   |       | 213,943    | 26,180    |
| E1BF46 | E1BF46_BOVIN | ZNF407    | Uncharacterized protein                  | 0.999 |  | SALNKPCSGTEVGGQFNK               | 3 | 0.999 |            |           |
|        |              |           |                                          |       |  | 2.8                              |   |       | 2,815,372  | 582,631   |
|        |              |           |                                          |       |  | DDASTDENRCTHCEKHAHSSLSLELHVK     | 3 | 0.999 |            |           |
|        |              |           |                                          |       |  | SSQSFGNDSLQTFPLSTLESENAKVSVEAGK  | 3 | 0.999 |            |           |
| E1BF47 | E1BF47_BOVIN | 790819    | Uncharacterized protein                  | 0.999 |  | 0.6                              |   |       | 6,873,103  | 325,633   |
|        |              |           |                                          |       |  | QHMQLVDSIVRQR                    | 3 | 0.999 |            |           |
| E1BF58 | E1BF58_BOVIN | Bt.63269  | Uncharacterized protein                  | 0.999 |  | 3.4                              |   |       | 3,048,615  | 199,824   |
| F1N4G3 | F1N4G3_BOVIN | TXLNB     | Uncharacterized protein                  | 0.999 |  | 3.1                              |   |       | 3,048,615  | 199,824   |
| E1BF59 | E1BF59_BOVIN | PLEC      | Uncharacterized protein                  | 0.999 |  | QNDLDRSTPLPAPEQAAGIQLER          | 3 | 0.999 |            |           |
|        |              |           |                                          |       |  | 0.7                              |   |       | 3,422,920  | 324,563   |
|        |              |           |                                          |       |  | LQNVQALDYLRRHQVK                 | 3 | 0.999 |            |           |
|        |              |           |                                          |       |  | LRGTPRHPELEDSTLR                 | 3 | 0.999 |            |           |
| E1BF73 | E1BF73_BOVIN | FAM190B   | Uncharacterized protein                  | 0.999 |  | 2.1                              |   |       | 1,101,480  | 120,448   |
| E1BF81 | E1BF81_BOVIN | Bt.17574  | Uncharacterized protein                  | 1.000 |  | TDEWIDISVDRSECSK                 | 3 | 0.999 |            |           |
|        |              |           |                                          |       |  | 8.2                              |   |       | 6,966,821  | 575,697   |
|        |              |           |                                          |       |  | HYEYLEALTTDFQDWAGASR             | 3 | 0.999 |            |           |
|        |              |           |                                          |       |  | THFSGITQEALPK                    | 2 | 0.988 |            |           |
| E1BF85 | E1BF85_BOVIN | GARNL3    | Uncharacterized protein                  | 0.999 |  | 4.5                              |   |       | 2,931,680  | 177,570   |
|        |              |           |                                          |       |  | TKGCHLYAINTHHSKELR               | 3 | 0.999 |            |           |
|        |              |           |                                          |       |  | VNVAADIVYEDGEAGLLLCYNSCIYKK      | 3 | 0.999 |            |           |
| E1BF91 | E1BF91_BOVIN | Q58CX6    | Uncharacterized protein                  | 0.999 |  | 9.5                              |   |       | 30,387,785 | 2,303,375 |
|        |              |           |                                          |       |  | LCPHPPTARLIIATDGGSPAQR           | 3 | 0.999 |            |           |
|        |              |           |                                          |       |  | TSGTPPGLVAQCSYSR                 | 3 | 0.999 |            |           |
| E1BF92 | E1BF92_BOVIN | Bt.39886  | Uncharacterized protein                  | 0.999 |  | 2.8                              |   |       | 1,443,161  | 365,077   |
|        |              |           |                                          |       |  | QKNPDVNRIVQQQFCGEYAYVTVNCQCGR    | 3 | 0.999 |            |           |
| E1BF94 | E1BF94_BOVIN | KBTD6     | Uncharacterized protein                  | 0.999 |  | 3.1                              |   |       | 3,664,375  | 353,533   |
|        |              |           |                                          |       |  | GPSAAEVFKCVRWTHFSDedr            | 3 | 0.999 |            |           |
| E1BFA4 | E1BFA4_BOVIN | Bt.56220  | Uncharacterized protein                  | 0.999 |  | 2.6                              |   |       | 1,990,562  | 125,786   |
| F1MTN9 | F1MTN9_BOVIN | TXNDK3    | Uncharacterized protein                  | 0.999 |  | 3.7                              |   |       | 1,990,562  | 125,786   |
| E1BFA8 | E1BFA8_BOVIN | NBAS      | Uncharacterized protein                  | 0.999 |  | ILLRQIVLSEEEAK                   | 3 | 0.999 |            |           |
|        |              |           |                                          |       |  | 1.1                              |   |       | 1,895,889  | 444,199   |
| E1BFB0 | E1BFB0_BOVIN | SPTAN1    | Uncharacterized protein                  | 1.000 |  | QVDVSDVADEEKRCGLFTELLEASHR       | 3 | 0.999 |            |           |
|        |              |           |                                          |       |  | 3.0                              |   |       | 4,788,889  | 515,814   |
|        |              |           |                                          |       |  | ALINADELANDVAGAEALLDR            | 3 | 0.999 |            |           |
|        |              |           |                                          |       |  | DLTSWVTEMKALINADELANDVAGAEALLDR  | 3 | 0.999 |            |           |
|        |              |           |                                          |       |  | FMLFREANELQOWINEK                | 3 | 0.999 |            |           |
|        |              |           |                                          |       |  | QQVAPMDDTGKELVLAALDYQEKSPR       | 3 | 0.999 |            |           |
| E1BFB4 | E1BFB4_BOVIN | MTOR      | Uncharacterized protein                  | 0.999 |  | 2.1                              |   |       | 6,383,381  | 245,591   |
|        |              |           |                                          |       |  | ELLEPLMVLGSPALTAIVYDLRSQVPLQKK   | 3 | 0.999 |            |           |
|        |              |           |                                          |       |  | SLVSPHEDMRTWLKYASLGGK            | 3 | 0.999 |            |           |
| E1BFD4 | E1BFD4_BOVIN | Bt.5959   | Uncharacterized protein                  | 0.999 |  | 5.8                              |   |       | 2,760,407  | 351,136   |
|        |              |           |                                          |       |  | FMDCPDELIEKSLDVNFK               | 3 | 0.999 |            |           |
| E1BFE2 | E1BFE2_BOVIN | PTPRB     | Uncharacterized protein (Fragment)       | 0.999 |  | 0.7                              |   |       | 5,250,192  | 1,200,699 |
|        |              |           |                                          |       |  | CAESPDNSKSFNIK                   | 3 | 0.999 |            |           |
| E1BFH7 | E1BFH7_BOVIN | SMC6      | Uncharacterized protein                  | 0.999 |  | 3.5                              |   |       | 4,846,842  | 349,924   |
|        |              |           |                                          |       |  | FRQFILLTPQSMSSLPSSKLIR           | 3 | 0.999 |            |           |
|        |              |           |                                          |       |  | TKEQINQGEERLSELK                 | 3 | 0.999 |            |           |
| E1BFI8 | E1BFI8_BOVIN | SPAG1     | Uncharacterized protein                  | 0.999 |  | 2.5                              |   |       | 1,704,514  | 286,482   |
|        |              |           |                                          |       |  | DGNCSGCQDCNRALHLPFSIK            | 3 | 0.999 |            |           |
| Q0VC51 | Q0VC51_BOVIN | IL1RAP    | Interleukin 1 receptor accessory protein | 0.999 |  | 8.1                              |   |       | 1,839,009  | 573,156   |
| E1BFL8 | E1BFL8_BOVIN | IL1RAP    | Uncharacterized protein (Fragment)       | 0.999 |  | 4.2                              |   |       | 1,839,009  | 573,156   |
| E1BFL9 | E1BFL9_BOVIN |           | Uncharacterized protein                  | 0.999 |  | 4.6                              |   |       | 1,637,667  | 218,093   |
|        |              |           |                                          |       |  | PDMEQLQDSSDTEASAREPR             | 3 | 0.999 |            |           |
| E1BFM0 | E1BFM0_BOVIN | Bt.91344  | Uncharacterized protein (Fragment)       | 0.999 |  | 1.3                              |   |       | 6,966,804  | 506,632   |
|        |              |           |                                          |       |  | LYFRGLEHLPLPK                    | 3 | 0.999 |            |           |
| E1BFM5 | E1BFM5_BOVIN |           | Uncharacterized protein                  | 0.999 |  | 3.7                              |   |       | 2,299,417  | 313,822   |
| F1MGK2 | F1MGK2_BOVIN |           | Uncharacterized protein                  | 0.999 |  | 3.6                              |   |       | 2,299,417  | 313,822   |
| G3MWW2 | G3MWW2_BOVIN |           | Uncharacterized protein                  | 0.999 |  | 3.7                              |   |       | 2,299,417  | 313,822   |
|        |              |           |                                          |       |  | DTANHNNVMTIASSASCDHLKGSNVLVIQK   | 3 | 0.999 |            |           |
|        |              |           |                                          |       |  | ITLSSRNQLLTIITSK                 | 3 | 0.999 |            |           |
|        |              |           |                                          |       |  | TGHCPTAVMVLIMVWGDGIFLPMADK       | 3 | 0.999 |            |           |
| E1BFM7 | E1BFM7_BOVIN | SAMD7     | Uncharacterized protein                  | 0.999 |  | 6.3                              |   |       | 168,645    | 33,929    |
| E1BFX2 | E1BFX2_BOVIN | SAMD7     | Uncharacterized protein                  | 0.999 |  | 4.7                              |   |       | 168,645    | 33,929    |
| E1BFH0 | E1BFH0_BOVIN | SAMD7     | Uncharacterized protein                  | 0.999 |  | 4.9                              |   |       | 168,645    | 33,929    |
| E1BFP4 | E1BFP4_BOVIN |           | Uncharacterized protein                  | 0.999 |  | GTGSQKVLDSDTSSKVSQVEEK           | 3 | 0.999 |            |           |
|        |              |           |                                          |       |  | 11.7                             |   |       | 2,885,154  | 428,566   |
| E1BFQ6 | E1BFQ6_BOVIN | ITGA6     | Uncharacterized protein                  | 0.999 |  | HMTITSRDIQTTRLMLLPGELAK          | 3 | 0.999 |            |           |
|        |              |           |                                          |       |  | 1.7                              |   |       | 3,502,924  | 189,352   |
| E1BFS6 | E1BFS6_BOVIN | Bt.986    | Uncharacterized protein                  | 0.999 |  | IDLRQKTLGAPSGICK                 | 3 | 0.999 |            |           |
| F1N3M5 | F1N3M5_BOVIN | FBXO5     | Uncharacterized protein                  | 0.999 |  | 4.0                              |   |       | 3,107,360  | 330,596   |
|        |              |           |                                          |       |  | 5.0                              |   |       | 3,107,360  | 330,596   |
|        |              |           |                                          |       |  | MKCDFNYNHVHSGIKPVK               | 3 | 0.999 |            |           |
| E1BFU1 | E1BFU1_BOVIN | Bt.33147  | Uncharacterized protein                  | 0.999 |  | 2.9                              |   |       | 882,899    | 425,221   |
| E1BFT8 | E1BFT8_BOVIN | WDR88     | Uncharacterized protein                  | 0.999 |  | 2.7                              |   |       | 882,899    | 425,221   |
| E1BFW0 | E1BFW0_BOVIN | MSL3      | Uncharacterized protein                  | 0.999 |  | TLKIWNVHTGEFR                    | 3 | 0.999 |            |           |
|        |              |           |                                          |       |  | 3.3                              |   |       | 2,963,558  | 269,928   |
| E1BFW7 | E1BFW7_BOVIN | Bt.33460  | Uncharacterized protein                  | 0.999 |  | VLYDAKIVDVIQKDEK                 | 3 | 0.999 |            |           |
|        |              |           |                                          |       |  | 2.7                              |   |       | 3,458,165  | 523,418   |
|        |              |           |                                          |       |  | SHYIGTKSMAALTVMAAAPPQIK          | 3 | 0.999 |            |           |
|        |              |           |                                          |       |  | TRQLVTSPPMSSSDGK                 | 3 | 0.999 |            |           |
| E1BFX9 | E1BFX9_BOVIN | OVCH2     | Uncharacterized protein                  | 0.999 |  | 4.0                              |   |       | 960,886    | 240,072   |
| G3N1P3 | G3N1P3_BOVIN | OVCH2     | Uncharacterized protein                  | 0.999 |  | 3.9                              |   |       | 960,886    | 240,072   |
| E1BG51 | E1BG51_BOVIN | SLC41A2   | Uncharacterized protein                  | 0.999 |  | VSTCGQSPVKSOPLNLYNIFSR           | 3 | 0.999 |            |           |
|        |              |           |                                          |       |  | 5.6                              |   |       | 4,533,858  | 725,394   |
| E1BG53 | E1BG53_BOVIN | Bt.63860  | Uncharacterized protein (Fragment)       | 0.984 |  | EASETTAMLQDDASSDADEVIVETGQKLPK   | 3 | 0.999 |            |           |
|        |              |           |                                          |       |  | 3.9                              |   |       | 3,422,326  | 399,020   |
|        |              |           |                                          |       |  | EDEEAGEDCPSPQLAPASPGDSPALGR      | 3 | 0.872 |            |           |
|        |              |           |                                          |       |  | EEDGSCDVGAPT                     | 3 | 0.871 |            |           |
| E1BG57 | E1BG57_BOVIN | Bt.40032  | Uncharacterized protein                  | 0.999 |  | 1.3                              |   |       | 86,592,609 | 5,361,491 |
|        |              |           |                                          |       |  | PPVRTASPAPSAHPQR                 | 3 | 0.999 |            |           |
| E1BG58 | E1BG58_BOVIN |           | Uncharacterized protein                  | 0.999 |  | 8.4                              |   |       | 1,730,446  | 257,638   |
| E1BG62 | E1BG62_BOVIN | PACS1     | Uncharacterized protein (Fragment)       | 0.999 |  | NLQLDYVDLYIMHYPLAK               | 3 | 0.999 |            |           |
|        |              |           |                                          |       |  | 1.8                              |   |       | 4,992,229  | 472,163   |
| E1BG87 | E1BG87_BOVIN | HAUS6     | Uncharacterized protein                  | 0.999 |  | VAAVGGQSYLSSILR                  | 3 | 0.999 |            |           |
|        |              |           |                                          |       |  | 3.2                              |   |       | 3,983,321  | 745,174   |
| E1BG99 | E1BG99_BOVIN | E1F4EN1F1 | Uncharacterized protein                  | 1.000 |  | SNPFQEKDHLVEEVAVARAVLSNSPOLSEEK  | 3 | 0.999 |            |           |
|        |              |           |                                          |       |  | 5.8                              |   |       | 23,633,067 | 1,009,258 |
|        |              |           |                                          |       |  | TPTLASPVFGTFPLR                  | 3 | 0.999 |            |           |
|        |              |           |                                          |       |  | TPTLASPVFGTFLRPVHQPVLVPHVPIVR    | 3 | 0.999 |            |           |
|        |              |           |                                          |       |  | VQDQVKNSTPMAEHLLETLSTVASNR       | 3 | 0.999 |            |           |
| E1BGA2 | E1BGA2_BOVIN | MITD1     | Uncharacterized protein                  | 0.999 |  | 11.3                             |   |       | 1,028,686  | 311,907   |
|        |              |           |                                          |       |  | PQSRFSLGYCDFLRPCHETTVDIFHNK      | 3 | 0.999 |            |           |
| E1BGA6 | E1BGA6_BOVIN | COG3      | Uncharacterized protein                  | 0.999 |  | 3.6                              |   |       | 1,438,222  | 276,467   |
| E1BGA9 | E1BGA9_BOVIN | Bt.106565 | Uncharacterized protein                  | 0.968 |  | RAVFQGLSQEALSACIQSLGASESISKNK    | 3 | 0.999 |            |           |
|        |              |           |                                          |       |  | 2.4                              |   |       | 5,450,063  | 307,311   |
| E1BGB2 | E1BGB2_BOVIN | Bt.103069 | Uncharacterized protein                  | 1.000 |  | VPAPRVSLFVGGLPPLGSPQEYR          | 3 | 0.881 |            |           |
|        |              |           |                                          |       |  | 2.0                              |   |       | 6,524,399  | 354,604   |
|        |              |           |                                          |       |  | LHSWASGPDYQKSSMGTVFR             | 3 | 0.845 |            |           |
|        |              |           |                                          |       |  | RDHIIQRIAGLSHMSFPDADTLK          | 3 | 0.999 |            |           |

|        |              |              |                                                   |       |      |                                    |   |           |            |
|--------|--------------|--------------|---------------------------------------------------|-------|------|------------------------------------|---|-----------|------------|
| E1BGEO | E1BGEO_BOVIN | MEGF6        | Uncharacterized protein                           | 0.999 | 0.8  |                                    |   | 9,188,629 | 3,480,365  |
| E1BGF3 | E1BGF3_BOVIN | HCFC1        | Uncharacterized protein (Fragment)                | 0.999 | 1.8  | FGVNCEHACSCR                       | 3 | 0.999     |            |
|        |              |              |                                                   |       |      | SGTVTVAQQAVQVTTVVGGVTK             | 3 | 0.999     | 10,351,208 |
|        |              |              |                                                   |       |      | VASSPVMVSNPATR                     | 3 | 0.999     | 2,322,229  |
| E1BGG3 | E1BGG3_BOVIN | CCDC24       | Uncharacterized protein                           | 0.999 | 4.8  |                                    |   | 3,649,474 | 658,586    |
| E1BGH1 | E1BGH1_BOVIN | UNC5CL       | Uncharacterized protein                           | 0.999 | 3.3  | AGDPSSCYRDLSEVIK                   | 3 | 0.999     |            |
| E1BGH8 | MMS22_BOVIN  | MMS22L       | Protein MMS22-like                                | 0.999 | 2.5  | LRAGAENQGLELDEKL                   | 3 | 0.999     | 1,917,573  |
| E1BGI2 | E1BGI2_BOVIN | CEP170       | Uncharacterized protein                           | 0.999 | 2.0  | RLATENLQCMVRACQVGGGEPAAQLTSVFR     | 3 | 0.999     | 4,073,312  |
| E1BGJ0 | E1BGJ0_BOVIN | Bt.854       | Uncharacterized protein                           | 1.000 | 1.0  | QHAVINYDASTDEHLVKDLGSLNGTFVNDVR    | 3 | 0.999     | 1,219,506  |
|        |              |              |                                                   |       |      |                                    |   | 3,311,867 | 527,363    |
| E1BGJ4 | E1BGJ4_BOVIN | MAN2A2       | Uncharacterized protein                           | 0.999 | 2.6  | MLTPPLLLLPLLSALVAADVPKTCSPK        | 3 | 0.859     | 7,446,259  |
|        |              |              |                                                   |       |      | RELLGRGPEDEIGDPLA                  | 3 | 1.000     | 395,626    |
| E1BGJ8 | E1BGJ8_BOVIN | Bt.43047     | Ubiquitin carboxyl-terminal hydrolas              | 0.999 | 1.4  | PDLHVQAFQGLSDYFDALYKRTGVEPGAR      | 3 | 0.999     | 501,144    |
| E1BND0 | E1BND0_BOVIN | USP24        | Ubiquitin carboxyl-terminal hydrolas              | 0.999 | 1.0  |                                    |   | 3,692,553 | 1,209,095  |
| E1BGK2 | E1BGK2_BOVIN | Bt.87836     | Uncharacterized protein                           | 0.999 | 4.6  | QQSVSTKDSLAGEALLVTCQLQR            | 3 | 0.999     | 3,692,553  |
| E1BGK7 | E1BGK7_BOVIN | TAF4B        | Uncharacterized protein                           | 0.999 | 2.4  | KDLSDMNSFGNEGAAALGEVLR             | 3 | 0.999     | 1,098,136  |
| E1BGL8 | E1BGL8_BOVIN | Bt.59431     | Uncharacterized protein                           | 0.999 | 1.8  | PVVGATVTLALPSVPPFGK                | 3 | 0.999     | 95,486     |
| E1BGM7 | E1BGM7_BOVIN | TDRD6        | Uncharacterized protein                           | 0.999 | 1.4  | QATLTLMDTGPRLGLLRCRVNDPPAQLR       | 3 | 0.999     | 2,060,415  |
| E1BGP4 | E1BGP4_BOVIN | MORC2        | Uncharacterized protein                           | 0.999 | 2.1  | VLDVLLHLRLVLLVPELSQQMQLGLAR        | 3 | 0.999     | 169,466    |
| E1BGR7 | E1BGR7_BOVIN | LOC614366    | Uncharacterized protein                           | 0.999 | 7.2  | DLNELSDSSGEEEDSADLKRAQK            | 3 | 0.999     | 19,743,000 |
| E1BGS2 | E1BGS2_BOVIN | ACAD10       | Uncharacterized protein                           | 0.999 | 1.7  | DANGNSFATRLSDIFVIK                 | 3 | 0.999     | 1,215,175  |
| E1BGS5 | E1BGS5_BOVIN | LOC531097    | Uncharacterized protein                           | 0.999 | 6.7  | ALRFADGPDEHVRAAVAK                 | 3 | 0.999     | 1,993,908  |
| E1BGU0 | E1BGU0_BOVIN | HEATR5A      | Uncharacterized protein                           | 0.999 | 0.9  | LPNNVTEFVLLGLTONPYLQK              | 3 | 0.999     | 1,993,908  |
| G3N2J2 | G3N2J2_BOVIN | HEATR5A      | Uncharacterized protein                           | 0.999 | 0.9  |                                    |   | 770,391   | 127,691    |
| E1BGU5 | E1BGU5_BOVIN | Bt.92277     | Uncharacterized protein                           | 0.999 | 1.4  | CNDLIRSKDDSPSYLPTK                 | 3 | 0.999     | 770,391    |
| E1BGU8 | E1BGU8_BOVIN | Bt.21142     | Uncharacterized protein                           | 0.999 | 3.2  | EHELLYRINAQMK                      | 3 | 0.999     | 1,668,904  |
| E1BGU9 | E1BGU9_BOVIN | Bt.61314     | Uncharacterized protein                           | 0.999 | 2.5  | TYETSAGSALQNSRCFQAKWTK             | 3 | 0.999     | 184,027    |
| Q863B3 | SND1_BOVIN   | SND1         | Staphylococcal nuclease domain-containing protein | 0.999 | 2.4  |                                    |   | 5,063,658 | 266,711    |
| E1BGV0 | E1BGV0_BOVIN |              | Uncharacterized protein                           | 0.999 | 12.7 | MVLSGCAIIVRGQPRGGPPPER             | 3 | 0.999     | 1,283,196  |
| E1BGW4 | E1BGW4_BOVIN | USP36        | Uncharacterized protein                           | 0.934 | 1.1  | ITQAHGNSGMVSAK                     | 3 | 0.999     | 237,961    |
| E1BGX7 | E1BGX7_BOVIN | TENC1        | Uncharacterized protein                           | 0.999 | 1.6  | VLPARQDAEPEK                       | 3 | 0.831     | 1,283,196  |
| E1BGY0 | E1BGY0_BOVIN | DROSHA       | Uncharacterized protein (Fragment)                | 0.999 | 1.0  | RRLAFGAYEGPPQGYAEPSVEK             | 3 | 0.999     | 237,961    |
| E1BGY3 | E1BGY3_BOVIN | FGF3         | Uncharacterized protein                           | 0.999 | 5.4  | EVLSDMHQILLYLR                     | 3 | 0.999     | 1,668,904  |
| E1BGY9 | E1BGY9_BOVIN | JPH3         | Uncharacterized protein                           | 1.000 | 5.8  | IHELGYNTYASR                       | 3 | 0.999     | 5,069,208  |
| E1BGZ0 | E1BGZ0_BOVIN | Bt.18701     | Uncharacterized protein                           | 0.999 | 3.7  | HGYGCMTFPDGKKEEGYK                 | 3 | 0.999     | 1,086,842  |
| E1BGZ1 | E1BGZ1_BOVIN | DUS3L        | Uncharacterized protein                           | 1.000 | 3.7  | LSNYEMEMKPLLRMDSYAODMHPK           | 3 | 0.999     | 11,778,662 |
| E1BGZ9 | E1BGZ9_BOVIN | PHF20L1      | Uncharacterized protein                           | 0.999 | 2.1  | AGYWNEYERFVPFSDQISNDSASAENR        | 3 | 0.999     | 2,119,964  |
| E1BH05 | E1BH05_BOVIN | Bt.25593     | Uncharacterized protein (Fragment)                | 0.999 | 2.5  | VNLAHRLPLDRDWGAALVTLHGR            | 3 | 0.999     | 1,108,316  |
| E1BH06 | E1BH06_BOVIN | Bt.105154    | Uncharacterized protein                           | 0.999 | 2.0  | HIKQLLIDMGKVQIATLCSV               | 3 | 0.999     | 394,982    |
|        |              |              |                                                   |       |      | EPEGGRRVLGVPVAVLGTTEEGSISIYKSSQGCK | 3 | 0.999     | 4,493,671  |
|        |              |              |                                                   |       |      |                                    |   | 2,940,562 | 1,098,767  |
|        |              |              |                                                   |       |      | ILSLAQDQVGGSAEK                    | 2 | 0.985     |            |
|        |              |              |                                                   |       |      | LGQYTSVPAK                         | 2 | 0.988     |            |
|        |              |              |                                                   |       |      | SFFPENWLWK                         | 2 | 0.985     |            |
| E1BH09 | E1BH09_BOVIN | VWA2         | Uncharacterized protein                           | 0.999 | 3.7  | ELAGLAPCWRSRGTDAVLAALCPFSSWK       | 3 | 0.999     | 5,461,125  |
| E1BH11 | E1BH11_BOVIN | SH3BP1       | Uncharacterized protein                           | 0.999 | 6.6  |                                    |   | 618,358   |            |
| E1BL56 | E1BL56_BOVIN | SH3BP1       | Uncharacterized protein                           | 0.999 | 4.6  |                                    |   | 217,457   | 47,346     |
| F1MFA4 | F1MFA4_BOVIN | SH3BP1       | Uncharacterized protein (Fragment)                | 0.999 | 4.4  | LSQAANKSGSQGLGGGPGSHTATANKVETLK    | 3 | 0.999     | 217,457    |
| E1BH28 | E1BH28_BOVIN | Bt.18208     | Uncharacterized protein                           | 1.000 | 3.4  |                                    |   | 47,346    | 47,346     |
| E1BHU5 | E1BHU5_BOVIN | ZBTB32       | Uncharacterized protein                           | 1.000 | 13.3 |                                    |   | 2,058,895 | 476,956    |
| E1BH29 | E1BH29_BOVIN | ALKBH5       | Uncharacterized protein                           | 0.999 | 4.3  | PSRASTSPSRPSSSTT                   | 3 | 0.999     | 476,956    |
| E1BH49 | E1BH49_BOVIN | LOC100140733 | Uncharacterized protein                           | 1.000 | 0.8  | AEKGLYNEHTVDRAPLR                  | 3 | 0.999     | 1,500,833  |
| F1MB15 | F1MB15_BOVIN | LOC100140733 | Uncharacterized protein                           | 1.000 | 0.8  |                                    |   | 122,022   |            |
|        |              |              |                                                   |       |      | AKELEYSLLLNLPHLEDENRFYSCFK         | 3 | 0.999     | 755,264    |
|        |              |              |                                                   |       |      | PQTPAAAGYITETVREIVARLLSK           | 3 | 0.999     | 89,375     |
| E1BH74 | E1BH74_BOVIN | Bt.102082    | Uncharacterized protein                           | 1.000 | 2.9  |                                    |   | 755,264   | 89,375     |
|        |              |              |                                                   |       |      | GRTSSTNEDEDLNPEOK                  | 3 | 0.999     | 11,465,531 |
|        |              |              |                                                   |       |      | PLPTPSLOAHLEAKTR                   | 3 | 0.999     | 598,673    |
|        |              |              |                                                   |       |      | SRAAGSTQGNQASNSSEVK                | 3 | 0.999     |            |
| E1BHA2 | E1BHA2_BOVIN | Bt.49344     | Uncharacterized protein                           | 0.999 | 5.8  | PEAGLRDQIIVPOAASQVPEAFTLK          | 3 | 0.999     | 3,715,825  |
| E1BHC8 | E1BHC8_BOVIN | ESPN         | Uncharacterized protein                           | 0.999 | 2.4  | SATISPPCNRSQSLSTLAWPR              | 3 | 0.999     | 444,518    |
| E1BHE0 | E1BHE0_BOVIN | Bt.57043     | Uncharacterized protein (Fragment)                | 0.999 | 3.1  | TVPLWENIDVQDFIHRRLK                | 3 | 0.999     | 3,693,296  |
| E1BHE1 | E1BHE1_BOVIN | TAKO3        | Uncharacterized protein                           | 0.919 | 1.1  | DLTTFLESQK                         | 2 | 0.888     | 787,562    |
| Q05B92 | TFE3_BOVIN   | TFE3         | Transcription factor E3                           | 0.999 | 2.6  |                                    |   | 1,773,376 | 261,199    |
| E1BHE4 | E1BHE4_BOVIN | TFE3         | Uncharacterized protein                           | 0.999 | 8.0  | RVKSELLIQMDGVGGALENDDPK            | 3 | 0.816     | 3,678,854  |
| E1BHE7 | E1BHE7_BOVIN | Bt.47777     | Uncharacterized protein                           | 0.999 | 4.0  | TPAMSSSSSRVLLR                     | 3 | 0.999     | 748,893    |
| E1BHF2 | E1BHF2_BOVIN | Bt.104141    | Uncharacterized protein                           | 0.976 | 9.2  | DSSEGGPPGSEGDGGGQSKPSRGGGGADK      | 3 | 0.999     | 2,959,396  |
| F1MAX6 | F1MAX6_BOVIN | Bt.104141    | Uncharacterized protein                           | 0.976 | 9.0  |                                    |   | 350,057   |            |
|        |              |              |                                                   |       |      | QELLEEEYEQKSIIVTLESFK              | 3 | 0.833     | 4,573,200  |
|        |              |              |                                                   |       |      |                                    |   | 272,682   | 272,682    |
| E1BHF6 | E1BHF6_BOVIN | SIPA1L3      | Uncharacterized protein                           | 0.999 | 1.7  | AAAGSPSGGGGGGEVR                   | 3 | 0.999     | 10,468,686 |
|        |              |              |                                                   |       |      | RGWPEYDMNTSEPK                     | 3 | 0.999     | 1,467,963  |
| E1BHG3 | E1BHG3_BOVIN | Bt.54887     | Uncharacterized protein                           | 0.905 | 2.3  | PVWSEADNFGVLLTASRHSQVPEAPDR        | 3 | 0.905     | 3,419,387  |
| E1BHH5 | E1BHH5_BOVIN | Bt.66431     | Uncharacterized protein                           | 0.999 | 2.8  |                                    |   | 258,032   |            |
| G3MZN6 | G3MZN6_BOVIN | Bt.66431     | Uncharacterized protein (Fragment)                | 0.999 | 2.8  | VFLFGAPSKKEMLSWILR                 | 3 | 0.999     | 1,049,509  |
| E1BHL0 | E1BHL0_BOVIN | Bt.91206     | Uncharacterized protein                           | 0.999 | 5.9  | SGPGGSGSGRGGAGVPGPGSGGPGGPAGR      | 3 | 0.999     | 201,154    |
| E1BHL6 | E1BHL6_BOVIN | QRFP         | Uncharacterized protein                           | 0.921 | 3.0  | VGDGSLVLRTHGK                      | 3 | 0.887     | 1,049,509  |
| E1BHL8 | E1BHL8_BOVIN | TNFRSF25     | Uncharacterized protein                           | 0.999 | 6.7  | PCGAATCLPCPOGTFLARENHYETRCAR       | 3 | 0.999     | 3,975,583  |
| E1BHM4 | E1BHM4_BOVIN | SIGLEC10     | Uncharacterized protein                           | 0.999 | 3.3  | VDFSREGVSTENTVRLSVAYAPK            | 3 | 0.999     | 264,224    |
| E1BHM6 | E1BHM6_BOVIN | Bt.88468     | Uncharacterized protein                           | 0.999 | 2.5  |                                    |   | 4,499,463 | 607,218    |
|        |              |              |                                                   |       |      |                                    |   | 4,210,071 | 515,976    |
|        |              |              |                                                   |       |      |                                    |   | 3,085,021 | 187,103    |
|        |              |              |                                                   |       |      |                                    |   | 9,226,071 | 259,889    |

|        |              |              |                                            |       |                                 |   |            |           |
|--------|--------------|--------------|--------------------------------------------|-------|---------------------------------|---|------------|-----------|
| E1B161 | E1B161_BOVIN | BL88468      | Uncharacterized protein                    | 0.999 | 2.5                             |   | 9,226,071  | 259,889   |
|        |              |              |                                            |       | CYPVIFPDGRNFR                   | 3 | 0.999      |           |
|        |              |              |                                            |       | HLCLDILFAFTRVLGESSGLDSMKAAIEEK  | 3 | 0.999      |           |
| E1BH44 | E1BH44_BOVIN | RNF213       | Uncharacterized protein                    | 0.999 | 1.0                             |   | 3,737,527  | 466,916   |
| G3N0D1 | G3N0D1_BOVIN | RNF213       | Uncharacterized protein (Fragment)         | 0.999 | 3.7                             |   | 3,737,527  | 466,916   |
|        |              |              |                                            |       | TQTGHLVGNPPRPAPVSDRQMSPPVFLLR   | 3 | 0.999      |           |
| E1BHR1 | E1BHR1_BOVIN | LOC785565    | Uncharacterized protein                    | 0.999 | 6.7                             |   | 2,296,765  | 245,223   |
|        |              |              |                                            |       | FAAICHPLSPYPTMNKRVFTK           | 3 | 0.999      |           |
| E1BHR5 | E1BHR5_BOVIN | HEATR6       | Uncharacterized protein (Fragment)         | 0.934 | 1.1                             |   | 1,894,540  | 812,750   |
|        |              |              |                                            |       | CPGSLVCLLYYVGG                  | 2 | 0.934      |           |
| E1BHS6 | E1BHS6_BOVIN | GAS2L2       | Uncharacterized protein                    | 0.999 | 1.9                             |   | 4,107,442  | 562,662   |
|        |              |              |                                            |       | EQGHHLLEELPTNMK                 | 3 | 0.999      |           |
| E1BHW8 | E1BHW8_BOVIN | LOC515112    | Uncharacterized protein                    | 0.999 | 3.4                             |   | 6,341,937  | 262,986   |
|        |              |              |                                            |       | SOVYPEHGLDPPFGEGR               | 3 | 0.999      |           |
| E1BHX7 | E1BHX7_BOVIN | PLCB3        | Uncharacterized protein                    | 0.999 |                                 |   | 2,954,488  | 311,734   |
|        |              |              |                                            |       | SFDPFTEVVDGIVANAVRVK            | 3 | 0.999      |           |
| E1BHZ0 | E1BHZ0_BOVIN |              | Uncharacterized protein                    | 0.999 | 22.2                            |   | 1,328,399  | 199,939   |
|        |              |              |                                            |       | ARQSVTLVLSAQLEDSAVYFCALREPTVR   | 3 | 0.999      |           |
| P13605 | FMOD_BOVIN   | FMOD         | Fibromodulin                               | 0.999 | 5.6                             |   | 1,003,373  | 482,091   |
| E1B102 | E1B102_BOVIN | FMOD         | Uncharacterized protein                    | 0.999 | 5.6                             |   | 1,003,373  | 482,091   |
|        |              |              |                                            |       | HLERLYLDHNLTTRIPSPLPR           | 3 | 0.999      |           |
| E1B122 | E1B122_BOVIN |              | Uncharacterized protein                    | 0.999 | 2.6                             |   | 537,009    | 102,197   |
| F1MSB1 | F1MSB1_BOVIN | BL92129      | Uncharacterized protein (Fragment)         | 0.999 | 2.3                             |   | 537,009    | 102,197   |
|        |              |              |                                            |       | GVDESTYCYDQLTFLHHIHLPLSAR       | 3 | 0.999      |           |
| E1B126 | E1B126_BOVIN | MDC1         | Uncharacterized protein (Fragment)         | 0.999 | 1.4                             |   | 5,769,625  | 965,250   |
|        |              |              |                                            |       | HGSPTAHVHEPCTTPPEPNSRSSR        | 3 | 0.999      |           |
| E1B145 | E1B145_BOVIN | BL44771      | Uncharacterized protein                    | 0.999 | 3.3                             |   | 2,245,463  | 244,140   |
|        |              |              |                                            |       | GLIQWKAGAHADSEMSSSLK            | 3 | 0.999      |           |
| E1B149 | E1B149_BOVIN | BL49801      | Uncharacterized protein                    | 0.999 | 2.8                             |   | 10,189,842 | 531,275   |
|        |              |              |                                            |       | MDRPNGLYPNLNPRTGR               | 3 | 0.999      |           |
| E1B158 | E1B158_BOVIN | RRM2         | Uncharacterized protein                    | 0.999 | 4.6                             |   | 1,678,584  | 244,100   |
|        |              |              |                                            |       | RFVIFPIEYHDIWQMYKK              | 3 | 0.999      |           |
| E1B160 | E1B160_BOVIN | ATE1         | Arginyl-tRNA-protein transferase 1         | 0.999 | 5.8                             |   | 3,599,274  | 592,885   |
|        |              |              |                                            |       | GEISKGNCEDEPMETVEDAVSSDFGLINK   | 3 | 0.999      |           |
| E1B182 | E1B182_BOVIN | BL52938      | Uncharacterized protein                    | 1.000 | 8.8                             |   | 11,324,719 | 475,711   |
|        |              |              |                                            |       | CLQDVGVDVSVFR                   | 2 | 0.995      |           |
|        |              |              |                                            |       | DLLFSDDETCANLQDR                | 2 | 0.999      |           |
|        |              |              |                                            |       | GDVAFVK                         | 1 | 0.971      |           |
|        |              |              |                                            |       | GDVAFVK                         | 2 | 0.979      |           |
|        |              |              |                                            |       | HPTVLQNTDGNPEAWAK               | 3 | 0.957      |           |
| E1B197 | E1B197_BOVIN | C13ORF40     | Uncharacterized protein                    | 1.000 | 2.5                             |   | 23,687,674 | 469,433   |
|        |              |              |                                            |       | DYESERLDYFPPSKYK                | 3 | 0.999      |           |
|        |              |              |                                            |       | LPPPOAESPIVLTNLDLQGGKTKGK       | 3 | 0.999      |           |
|        |              |              |                                            |       | RLDAGIKELLESSGTGK               | 3 | 0.999      |           |
| E1B1A7 | E1B1A7_BOVIN | BL26568      | Uncharacterized protein                    | 0.999 | 1.4                             |   | 1,979,529  | 188,002   |
|        |              |              |                                            |       | CLTQQAVALQRTMNEYR               | 3 | 0.999      |           |
| E1B1A0 | E1B1A0_BOVIN | BL86203      | Uncharacterized protein                    | 0.999 | 2.2                             |   | 1,654,073  | 151,110   |
| E1B1A9 | E1B1A9_BOVIN | TAF3         | Uncharacterized protein                    | 0.999 | 1.8                             |   | 1,654,073  | 151,110   |
|        |              |              |                                            |       | VVPAPEAKPAPSLNRPK               | 3 | 0.999      |           |
| E1B1B3 | E1B1B3_BOVIN | VPS28        | Uncharacterized protein                    | 0.999 | 10.4                            |   | 4,486,475  | 510,188   |
|        |              |              |                                            |       | VSRVLQTLSSGMSASDELDDSQVR        | 3 | 0.999      |           |
| E1B1B9 | E1B1B9_BOVIN | TPCN2        | Uncharacterized protein                    | 0.999 | 2.0                             |   | 926,562    | 153,226   |
|        |              |              |                                            |       | SINHRMDARSLWLYR                 | 3 | 0.999      |           |
| E1B1F0 | E1B1F0_BOVIN | POLE         | Uncharacterized protein                    | 0.999 | 0.8                             |   | 5,241,858  | 1,967,274 |
|        |              |              |                                            |       | DSQGEYKSPCOIHMDCLR              | 3 | 0.999      |           |
| E1B1F3 | E1B1F3_BOVIN | SRBD1        | Uncharacterized protein                    | 0.999 | 2.6                             |   | 801,404    | 91,142    |
|        |              |              |                                            |       | PNVKGLSALQDIETGVQHILADMAIA      | 3 | 0.999      |           |
| E1B1F6 | E1B1F6_BOVIN | VPS13D       | Uncharacterized protein                    | 0.999 | 0.4                             |   | 3,959,488  | 465,196   |
|        |              |              |                                            |       | AVNTSSGVSIPGPSHOK               | 3 | 0.999      |           |
| E1B1F8 | E1B1F8_BOVIN | LOC613370    | Uncharacterized protein                    | 0.999 | 6.7                             |   | 3,987,923  | 3,113,071 |
|        |              |              |                                            |       | TPKVPPVNFPEFSK                  | 3 | 0.999      |           |
| E1B1G4 | E1B1G4_BOVIN | STRC         | Uncharacterized protein                    | 0.999 | 1.5                             |   | 1,337,640  | 291,682   |
|        |              |              |                                            |       | GSPDWEPLGLLGDVLALLGQEQTPR       | 3 | 0.999      |           |
| E1B1J2 | E1B1J2_BOVIN | SLC47A2      | Uncharacterized protein                    | 0.999 | 4.2                             |   | 4,001,283  | 654,920   |
|        |              |              |                                            |       | SAISGTLCTVGTSLVWVGLLSLR         | 3 | 0.999      |           |
| E1B1K3 | E1B1K3_BOVIN | ELL2         | Uncharacterized protein (Fragment)         | 1.000 | 4.2                             |   | 413,879    | 62,714    |
|        |              |              |                                            |       | DGVNQDKNSLQVAVLQVANNLNP         | 3 | 0.999      |           |
| E1B1M8 | E1B1M8_BOVIN | SRC          | Uncharacterized protein                    | 0.999 | 5.0                             |   | 3,710,392  | 321,734   |
|        |              |              |                                            |       | LEVKLGQCGFGEVVMGTWNGTTRVAIK     | 3 | 0.999      |           |
| G3MYQ1 | G3MYQ1_BOVIN | FHOD1        | Uncharacterized protein                    | 1.000 | 4.1                             |   | 2,125,369  | 156,346   |
| E1B1N0 | E1B1N0_BOVIN | FHOD1        | Uncharacterized protein (Fragment)         | 1.000 | 3.2                             |   | 2,125,369  | 156,346   |
|        |              |              |                                            |       | PDSSDLYSEIFALPARCAK             | 3 | 0.999      |           |
|        |              |              |                                            |       | SPFPPTPPPPAAPLPHSAPDGPALPTKR    | 3 | 0.815      |           |
| E1B1P3 | E1B1P3_BOVIN | BL8401       | Uncharacterized protein                    | 0.999 | 2.4                             |   | 7,343,713  | 1,503,939 |
|        |              |              |                                            |       | PFPEEQARLYLR                    | 3 | 0.999      |           |
| E1B1R5 | E1B1R5_BOVIN | LOC100336614 | Uncharacterized protein                    | 0.999 | 1.5                             |   | 4,120,870  | 440,893   |
|        |              |              |                                            |       | CRDAVEHCCGISKTEDR               | 3 | 0.999      |           |
| E1B1R7 | E1B1R7_BOVIN | C1QL1        | Uncharacterized protein                    | 0.999 | 8.5                             |   | 11,081,254 | 6,436,028 |
|        |              |              |                                            |       | PGPPGPPGPPGPPGPPGPPG            | 3 | 0.999      |           |
| E1B1R8 | E1B1R8_BOVIN | FLG2         | Uncharacterized protein                    | 0.999 | 1.8                             |   | 7,342,540  | 2,200,961 |
|        |              |              |                                            |       | HGSSSELEASYARQKHGSSSK           | 3 | 0.999      |           |
|        |              |              |                                            |       | NQHSSGGQGTGDSRRHSEHGRRHNSGR     | 3 | 0.999      |           |
| E1B1S1 | E1B1S1_BOVIN | SOCS4        | Uncharacterized protein                    | 0.999 | 3.8                             |   | 2,237,928  | 331,118   |
|        |              |              |                                            |       | PPEEEDAEEAOEPGSELLCPR           | 3 | 0.999      |           |
| E1B1S4 | E1B1S4_BOVIN | BL105579     | Uncharacterized protein                    | 0.932 | 1.9                             |   | 2,328,292  | 297,912   |
|        |              |              |                                            |       | GGGAGAGGGSSHGHLHDSAER           | 2 | 0.932      |           |
| E1B1S6 | E1B1S6_BOVIN | BL105256     | Uncharacterized protein                    | 0.973 | 1.2                             |   | 19,417,500 | 1,573,361 |
|        |              |              |                                            |       | RELQEELAAARALEALLGR             | 3 | 0.857      |           |
| E1BIU4 | E1BIU4_BOVIN | ZC3H7B       | Uncharacterized protein                    | 1.000 | 4.9                             |   | 5,892,864  | 936,865   |
|        |              |              |                                            |       | KYWOOMEAHTGKASSSLGAPR           | 3 | 0.999      |           |
|        |              |              |                                            |       | PAPSPPEMPTNALLKNPLAATHEFK       | 3 | 0.821      |           |
| E1BIU5 | E1BIU5_BOVIN | 787288       | Uncharacterized protein                    | 0.999 | 4.2                             |   | 9,323,708  | 667,770   |
|        |              |              |                                            |       | HPPEQTNQVHTPPHVASALAGAVSPGALRR  | 3 | 0.999      |           |
| E1BIU8 | E1BIU8_BOVIN | PTPRS        | Uncharacterized protein                    | 1.000 | 1.9                             |   | 12,033,904 | 766,519   |
|        |              |              |                                            |       | DENVYECVAGNSVGEITVHAK           | 3 | 0.999      |           |
|        |              |              |                                            |       | QYGGFDRNGLPEGHR                 | 3 | 0.999      |           |
| E1BIV1 | E1BIV1_BOVIN | FOX3         | Uncharacterized protein                    | 0.999 | 4.6                             |   | 4,230,721  | 117,571   |
|        |              |              |                                            |       | EVAGAGAGPGGEAGASEADGCK          | 3 | 0.999      |           |
| E1BIW0 | E1BIW0_BOVIN | UBR1         | Uncharacterized protein                    | 0.999 | 1.2                             |   | 2,493,258  | 286,901   |
|        |              |              |                                            |       | YELADAFNKTISIKDQDLVK            | 3 | 0.999      |           |
| E1BIW9 | E1BIW9_BOVIN | LIN54        | Uncharacterized protein                    | 0.940 | 2.8                             |   | 807,415    | 117,674   |
|        |              |              |                                            |       | CLMSVINSAGKAKSDPCAMNC           | 3 | 0.814      |           |
| E1BIZ2 | E1BIZ2_BOVIN | SSH1         | Uncharacterized protein                    | 0.999 | 3.0                             |   | 614,890    | 135,426   |
|        |              |              |                                            |       | TICITYPTSSMSSNLTRSSSDSIHSVRGK   | 3 | 0.999      |           |
| E1BJ11 | E1BJ11_BOVIN | CELSR2       | Uncharacterized protein (Fragment)         | 0.999 | 1.6                             |   | 3,864,277  | 927,096   |
|        |              |              |                                            |       | LEROYVLAVTASDGR                 | 3 | 0.999      |           |
|        |              |              |                                            |       | STITLQREGRRVLSVEGTGLQASSLQLEPGR | 3 | 0.999      |           |
| E1BJ14 | E1BJ14_BOVIN | STON1        | Uncharacterized protein                    | 0.999 | 3.1                             |   | 2,639,879  | 298,089   |
|        |              |              |                                            |       | VENFSMAGKHTVKIEHVSYTEK          | 3 | 0.999      |           |
| E1BJ15 | E1BJ15_BOVIN | CEP290       | Uncharacterized protein                    | 0.999 | 0.8                             |   | 2,375,536  | 387,215   |
|        |              |              |                                            |       | GPQLEGADSKSWKSIVVTR             | 3 | 0.999      |           |
| E1BJ30 | E1BJ30_BOVIN | PRDM1        | Uncharacterized protein                    | 0.999 | 3.1                             |   | 3,392,983  | 351,274   |
|        |              |              |                                            |       | LEDMEDNIDMTSVVENILAVRKEK        | 3 | 0.999      |           |
| E1BJ42 | E1BJ42_BOVIN | ENG          | Uncharacterized protein                    | 0.999 | 5.9                             |   | 12,261,488 | 1,445,776 |
|        |              |              |                                            |       | THSCGGSLQSPPTPVEITTPNK          | 3 | 0.999      |           |
| E1BJ47 | E1BJ47_BOVIN | GBX2         | Uncharacterized protein                    | 0.999 | 9.2                             |   | 2,349,797  | 486,031   |
|        |              |              |                                            |       | FAPQQLPGGSNFDKPEALQADAEDGKGFLAK | 3 | 0.999      |           |
| E1BJ59 | E1BJ59_BOVIN | ATXN2L       | Uncharacterized protein                    | 0.999 | 2.1                             |   | 2,143,687  | 564,527   |
|        |              |              |                                            |       | EFLSAGGWIHGADGLQVQGDAR          | 3 | 0.999      |           |
| E1BJ94 | E1BJ94_BOVIN | LOC100140490 | Uncharacterized protein                    | 0.999 | 5.6                             |   | 3,916,196  | 263,883   |
| E1BL16 | E1BL16_BOVIN | LOC100140490 | Uncharacterized protein                    | 0.999 | 5.7                             |   | 3,916,196  | 263,883   |
|        |              |              |                                            |       | SVKDIIHENHYPSHKNDIAVVR          | 3 | 0.999      |           |
| E1BJ97 | E1BJ97_BOVIN | BL21098      | Uncharacterized protein                    | 0.999 | 4.7                             |   | 888,911    | 64,144    |
| Q0VC74 | TMLH_BOVIN   | TMLHE        | Trimethyllysine dioxygenase, mitochondrial | 0.999 | 4.8                             |   | 888,911    | 64,144    |
| G3X6X8 | G3X6X8_BOVIN | TMLHE        | Uncharacterized protein (Fragment)         | 0.999 | 6.6                             |   | 888,911    | 64,144    |

|        |              |              |                                              |       |                                  |   |       |            |           |
|--------|--------------|--------------|----------------------------------------------|-------|----------------------------------|---|-------|------------|-----------|
|        |              |              |                                              |       | HTDITYFQPCGIVFHLCK               | 3 | 0.999 |            |           |
| E1BJA0 | E1BJA0_BOVIN | RAB33A       | Uncharacterized protein                      | 0.999 | 8.4                              |   |       | 2,030,792  | 278,337   |
| E1BJA1 | E1BJA1_BOVIN | Bt.64818     | Uncharacterized protein                      | 0.999 | ESQNVEIFMCLACRLKAQK              | 3 | 0.999 |            |           |
| E1BP14 | E1BP14_BOVIN | Bt.64818     | Uncharacterized protein                      | 0.999 | 3.0                              |   |       | 655,446    | 120,214   |
|        |              |              |                                              | 0.999 | 1.5                              |   |       | 655,446    | 120,214   |
| E1BJA5 | E1BJA5_BOVIN | MGAT3        | Uncharacterized protein                      | 0.999 | AEPDVCAICAVSARILCIGAVPLQRCCHR    | 3 | 0.999 |            |           |
|        |              |              |                                              | 0.999 | 3.4                              |   |       | 2,968,100  | 936,934   |
| E1BJC0 | E1BJC0_BOVIN | Bt.52441     | Uncharacterized protein                      | 0.999 | LVSAQNGDPPRWGDYEDK               | 3 | 0.999 |            |           |
|        |              |              |                                              | 0.999 | 6.0                              |   |       | 1,352,559  | 465,661   |
| E1BJC1 | E1BJC1_BOVIN | OSBPL11      | Uncharacterized protein                      | 0.999 | LGSAAAVSAAAAAAAAARSTEEEEER       | 3 | 0.999 |            |           |
|        |              |              |                                              | 0.999 | 5.2                              |   |       | 7,085,119  | 437,112   |
| E1BJC4 | E1BJC4_BOVIN | PIWIL1       | Uncharacterized protein                      | 0.999 | LHRVTGEVKHNITNTVCCR              | 3 | 0.999 |            |           |
|        |              |              |                                              | 0.999 | NSSNSCGGGISSSSSSSR               | 3 | 0.999 |            |           |
| E1BJC6 | E1BJC6_BOVIN | TRIM8        | Uncharacterized protein                      | 1.000 | LQHKVTEVFSQTRNGEHR               | 3 | 0.999 |            |           |
|        |              |              |                                              | 1.000 | 6.3                              |   |       | 2,131,679  | 330,228   |
| E1BJE2 | E1BJE2_BOVIN | Bt.61118     | Uncharacterized protein                      | 0.999 | ILMDRTQTCTGSSLSPK                | 3 | 0.999 |            |           |
|        |              |              |                                              | 0.999 | 2.3                              |   |       | 1,353,466  | 190,267   |
| E1BJE5 | E1BJE5_BOVIN | Bt.104206    | Uncharacterized protein                      | 0.999 | VNGKHTLGENIADMGLK                | 3 | 0.999 |            |           |
|        |              |              |                                              | 0.999 | 2.7                              |   |       | 982,095    | 116,011   |
| E1BJG7 | E1BJG7_BOVIN | C15H11orf42  | Uncharacterized protein                      | 0.999 | ITPALATPAATPTESQAR               | 3 | 0.999 |            |           |
|        |              |              |                                              | 0.999 | 8.4                              |   |       | 1,330,376  | 323,692   |
| E1BJH5 | E1BJH5_BOVIN | MAP4K3       | Uncharacterized protein                      | 0.999 | FGPNVAVVFLSDAACYDLLGLVLVKQSR     | 3 | 0.999 |            |           |
|        |              |              |                                              | 0.999 | 1.9                              |   |       | 3,429,838  | 666,866   |
| E1BJI0 | E1BJI0_BOVIN | Bt.85213     | Uncharacterized protein                      | 0.999 | RCPTSESPAKPSQVPPR                | 3 | 0.999 |            |           |
|        |              |              |                                              | 0.999 | 1.5                              |   |       | 664,211    | 80,198    |
| E1BJI7 | E1BJI7_BOVIN | Bt.20768     | Uncharacterized protein (Fragment)           | 1.000 | LSAPSSAVVPRRAQDPPSPMPVGSPETR     | 3 | 0.999 |            |           |
|        |              |              |                                              | 1.000 | 1.1                              |   |       | 3,909,229  | 410,947   |
| E1BJI8 | E1BJI8_BOVIN | RALGPS1      | Uncharacterized protein                      | 0.999 | CQGAAVTVQFEGMHKNEAISQQLHVLRK     | 3 | 0.999 |            |           |
|        |              |              |                                              | 0.999 | 6.1                              |   |       | 964,084    | 229,918   |
| E1BJJ6 | E1BJJ6_BOVIN | LOC787432    | Uncharacterized protein                      | 0.999 | RNGLMASVLVTATPQSSSSSDSLEGQCDYASK | 3 | 0.999 |            |           |
|        |              |              |                                              | 0.999 | 14.1                             |   |       | 284,106    | 35,897    |
| E1BJM1 | E1BJM1_BOVIN | Bt.5158      | Uncharacterized protein                      | 0.999 | AICCSCELNINITVEK                 | 3 | 0.999 |            |           |
|        |              |              |                                              | 0.999 | 3.9                              |   |       | 3,371,188  | 444,707   |
| E1BJQ4 | E1BJQ4_BOVIN | Bt.36909     | Uncharacterized protein                      | 0.999 | ALGSARFLTGLTGLATLHTYRGR          | 3 | 0.999 |            |           |
|        |              |              |                                              | 0.999 | 4.1                              |   |       | 455,405    | 89,710    |
| E1BJR9 | E1BJR9_BOVIN | ZIC3         | Uncharacterized protein                      | 0.999 | LHSSLELGRPPLEGENER               | 3 | 0.999 |            |           |
|        |              |              |                                              | 0.999 | 7.3                              |   |       | 1,029,925  | 179,636   |
| E1BJS1 | E1BJS1_BOVIN | Bt.13896     | Uncharacterized protein                      | 0.999 | HMKVHESQSGSSPAASSGYESSPPAIASANSK | 3 | 0.999 |            |           |
|        |              |              |                                              | 0.999 | 10.2                             |   |       | 886,268    | 222,322   |
| E1BJS4 | E1BJS4_BOVIN | SRRM3        | Uncharacterized protein                      | 0.999 | GLSLGSDGGGASILDHSGALSVGKHFNLYR   | 3 | 0.999 |            |           |
|        |              |              |                                              | 0.999 | 5.2                              |   |       | 32,449,171 | 3,811,634 |
| E1BJT1 | E1BJT1_BOVIN | TBX18        | Uncharacterized protein                      | 0.999 | AQVSSSNGWPRPCSPGPPWAMSSVGGGGER   | 3 | 0.999 |            |           |
|        |              |              |                                              | 0.999 | 3.8                              |   |       | 460,551    | 76,814    |
| E1BJU5 | E1BJU5_BOVIN | LOC100336736 | Uncharacterized protein                      | 0.999 | PGTPLPSPQAPRVDLQGAELWKR          | 3 | 0.999 |            |           |
|        |              |              |                                              | 0.999 | 2.1                              |   |       | 6,466,888  | 599,979   |
| E1BJV9 | E1BJV9_BOVIN | Bt.40077     | Uncharacterized protein                      | 0.999 | NSAENRTIQTFLTEVK                 | 3 | 0.999 |            |           |
|        |              |              |                                              | 0.999 | 6.2                              |   |       | 12,895,113 | 876,095   |
| E1BJW7 | E1BJW7_BOVIN | VPS53        | Uncharacterized protein                      | 0.999 | LSSRPSDDGEGAENGIAMCNKEQVK        | 3 | 0.999 |            |           |
|        |              |              |                                              | 0.999 | NRGLGEEALYDNAVLVDNLPSFK          | 3 | 0.999 |            |           |
|        |              |              |                                              | 0.999 | 5.2                              |   |       | 2,219,574  | 494,694   |
| E1BJX3 | E1BJX3_BOVIN | RAD51AP2     | Uncharacterized protein                      | 0.999 | GQTNVGGDGRQAEEAQAQ               | 3 | 0.999 |            |           |
|        |              |              |                                              | 0.999 | 9.6                              |   |       | 9,657,221  | 3,397,922 |
| E1BJX6 | E1BJX6_BOVIN | SCUBE3       | Uncharacterized protein                      | 0.999 | FDADSANKFTIKLENANCK              | 3 | 0.999 |            |           |
|        |              |              |                                              | 0.999 | 2.1                              |   |       | 396,125    | 60,058    |
| E1BJZ5 | E1BJZ5_BOVIN | Bt.8493      | Uncharacterized protein                      | 0.999 | NHGCAHCIRETPKGGIACECR            | 3 | 0.999 |            |           |
|        |              |              |                                              | 0.999 | 3.1                              |   |       | 721,932    | 164,035   |
| E1BK19 | E1BK19_BOVIN | Bt.61853     | Uncharacterized protein                      | 0.999 | AQPTYVKEVPGFVGGPTTMSPGMTPLLAAQPR | 3 | 0.999 |            |           |
|        |              |              |                                              | 0.999 | 1.5                              |   |       | 1,441,105  | 336,700   |
| E1BK25 | E1BK25_BOVIN | WDR62        | Uncharacterized protein                      | 0.999 | SPGCESSAGSQQVERARSPSPCGPSEEAR    | 3 | 0.999 |            |           |
|        |              |              |                                              | 0.999 | 1.4                              |   |       | 4,656,612  | 457,241   |
| E1BK28 | E1BK28_BOVIN |              | Uncharacterized protein                      | 0.999 | ESLDPDQCLLTNGKLPLWAK             | 3 | 0.999 |            |           |
|        |              |              |                                              | 0.999 | 1.6                              |   |       | 35,204,771 | 1,574,890 |
| E1BK33 | E1BK33_BOVIN | Bt.61525     | Uncharacterized protein                      | 0.999 | PDGILCILGIDSRYNCR                | 3 | 0.999 |            |           |
|        |              |              |                                              | 0.999 | 0.8                              |   |       | 1,161,379  | 586,875   |
| E1BK51 | E1BK51_BOVIN | TRIM62       | Uncharacterized protein                      | 0.999 | HQQLSGDPAVEK                     | 3 | 0.999 |            |           |
|        |              |              |                                              | 0.999 | 5.5                              |   |       | 573,562    | 125,227   |
| E1BK52 | STK10_BOVIN  | STK10        | Serine/threonine-protein kinase 1f           | 0.999 | LILSDCTIVAYGNLHPQLQDSPKR         | 3 | 0.999 |            |           |
|        |              |              |                                              | 0.999 | 3.2                              |   |       | 2,086,735  | 618,743   |
| E1BK57 | E1BK57_BOVIN | TBX3         | Uncharacterized protein                      | 0.999 | AEVMEIEEDRDEGDEEADVAEASPLENHTR   | 3 | 0.999 |            |           |
|        |              |              |                                              | 0.999 | 2.6                              |   |       | 1,392,606  | 275,452   |
| E1BK65 | E1BK65_BOVIN | SGOL1        | Uncharacterized protein                      | 0.999 | QAKLLPKGLIVCAHGVNVR              | 3 | 0.999 |            |           |
|        |              |              |                                              | 0.999 | 5.8                              |   |       | 3,495,546  | 276,581   |
| E1BK68 | E1BK68_BOVIN | FBXO41       | Uncharacterized protein                      | 0.999 | GGSETTEPPGKGGTVLPEAPQSPHFSLK     | 3 | 0.999 |            |           |
|        |              |              |                                              | 0.999 | 6.8                              |   |       | 5,163,171  | 474,319   |
| E1BK69 | E1BK69_BOVIN | UFSP2        | Uncharacterized protein                      | 0.999 | EGLKGLLEMLVLTATPVTPKALLHFNCSICR  | 3 | 0.999 |            |           |
|        |              |              |                                              | 0.999 | 3.9                              |   |       | 185,768    | 33,092    |
| E1BK77 | E1BK77_BOVIN | DOCK6        | Uncharacterized protein                      | 0.999 | MREHHAGPAMPSTYAVSRHSGSSPSTGASSR  | 3 | 0.999 |            |           |
|        |              |              |                                              | 0.999 | 4.3                              |   |       | 13,771,850 | 585,399   |
| E1BK89 | E1BK89_BOVIN | LCT          | Uncharacterized protein                      | 0.999 | KLLVDIHNQLTDMKCLK                | 3 | 0.999 |            |           |
|        |              |              |                                              | 0.999 | 1.0                              |   |       | 33,049,167 | 2,451,268 |
| E1BK91 | E1BK91_BOVIN | CEP78        | Uncharacterized protein                      | 0.999 | SLDMKARLEEAAILGTIGAR             | 3 | 0.999 |            |           |
|        |              |              |                                              | 0.999 | 1.8                              |   |       | 5,821,000  | 1,255,684 |
| F1N7J2 | F1N7J2_BOVIN | ATP2B1       | Uncharacterized protein                      | 0.999 | OCPSPVAQLPEFTEAEK                | 3 | 0.999 |            |           |
| E1BK99 | E1BK99_BOVIN | Bt.8872      | Uncharacterized protein                      | 0.999 | QKHTQPGEQELSHRSSF                | 3 | 0.999 |            |           |
|        |              |              |                                              | 0.999 | 2.5                              |   |       | 2,274,000  | 422,033   |
|        |              |              |                                              | 0.999 | 1.5                              |   |       | 2,274,000  | 422,033   |
| E1BK0  | E1BK0_BOVIN  | CLEC9A       | Uncharacterized protein                      | 0.999 | HVGNKTECALLGLDLK                 | 3 | 0.999 |            |           |
|        |              |              |                                              | 0.999 | 7.1                              |   |       | 4,758,067  | 601,178   |
| E1BK1  | E1BK1_BOVIN  | FOXN2        | Uncharacterized protein                      | 0.999 | QDEKLQQRALLNFTQWK                | 3 | 0.999 |            |           |
|        |              |              |                                              | 0.999 | 3.0                              |   |       | 881,432    | 129,867   |
| E1KB7  | E1KB7_BOVIN  | MGA          | Uncharacterized protein                      | 1.000 | SSHVSGDSEGR                      | 3 | 0.999 |            |           |
|        |              |              |                                              | 1.000 | 1.3                              |   |       | 4,106,825  | 356,270   |
| E1BK4  | E1BK4_BOVIN  | NIPBL        | Uncharacterized protein                      | 0.999 | EESKVEFSGSRVAEQSNPK              | 3 | 0.999 |            |           |
|        |              |              |                                              | 0.999 | 3.9                              |   |       | 8,239,446  | 656,292   |
| E1BK2  | E1BK2_BOVIN  | USP40        | Uncharacterized protein                      | 0.999 | MFPYCRYWITGLDSNMK                | 3 | 0.999 |            |           |
|        |              |              |                                              | 0.999 | 0.8                              |   |       | 1,789,260  | 230,737   |
| E1BE1  | E1BE1_BOVIN  | FRYL         | Uncharacterized protein                      | 0.999 | LEILLISSNSLSKISFQFSRK            | 3 | 0.999 |            |           |
|        |              |              |                                              | 0.999 | 1.6                              |   |       | 953,572    | 248,064   |
| E1BE4  | E1BE4_BOVIN  | GLIS2        | Uncharacterized protein                      | 0.999 | YFPDKFAWLPSVSSWSQTTK             | 3 | 0.999 |            |           |
|        |              |              |                                              | 0.999 | 0.8                              |   |       | 3,036,382  | 879,673   |
| Q8WN95 | ITPR3_BOVIN  | ITPR3        | Inositol 1,4,5-trisphosphate receptor type 3 | 0.901 | DIRCHFSALVANIQIVPVHQRR           | 3 | 0.999 |            |           |
| E1BKE7 | E1BKE7_BOVIN | ITPR3        | Uncharacterized protein                      | 0.901 | YLDGVPSSFFQLPLGSGGALHLPASSFLTTPK | 3 | 0.999 |            |           |
| F1MT66 | F1MT66_BOVIN | ITPR3        | Uncharacterized protein                      | 0.901 | 1.0                              |   |       | 108,448    | 16,423    |
|        |              |              |                                              | 0.901 | 1.0                              |   |       | 108,448    | 16,423    |
| E1BKG1 | E1BKG1_BOVIN | Bt.45313     | Uncharacterized protein                      | 0.999 | IGEQAEAMFVGKTSMLLEVDEGGR         | 3 | 0.826 |            |           |
| F6QF21 | F6QF21_BOVIN | Bt.45313     | Uncharacterized protein                      | 0.999 | 5.7                              |   |       | 1,633,070  | 216,543   |
|        |              |              |                                              | 0.999 | 5.7                              |   |       | 1,633,070  | 216,543   |
| E1BKG4 | E1BKG4_BOVIN | PDS5A        | Uncharacterized protein (Fragment)           | 0.999 | RSAWTSHGHPAQSKAAQPSSTVPK         | 3 | 0.999 |            |           |
|        |              |              |                                              | 0.999 | 1.0                              |   |       | 6,112,629  | 881,623   |
| E1BKG7 | E1BKG7_BOVIN | POLR3E       | Uncharacterized protein                      | 0.999 | LQMVVKTFMDMDQSEDEK               | 3 | 0.999 |            |           |
|        |              |              |                                              | 0.999 | 2.0                              |   |       | 5,162,079  | 728,670   |
| E1BKH5 | E1BKH5_BOVIN | SETDB1       | Uncharacterized protein                      | 0.905 | PSFSLYLDKADAKHR                  | 3 | 0.999 |            |           |
|        |              |              |                                              | 0.905 | 1.9                              |   |       | 3,338,696  | 622,646   |
| E1BKH6 | E1BKH6_BOVIN | Bt.39995     | Uncharacterized protein                      | 0.999 | PGSVGSGHSPTSALSENAPGGK           | 3 | 0.834 |            |           |
|        |              |              |                                              | 0.999 | 4.3                              |   |       | 10,197,217 | 3,671,937 |
| E1BK8  | E1BK8_BOVIN  | KCNS1        | Uncharacterized protein (Fragment)           | 0.999 | ESNGSNQIIPSPSTISELDNK            | 3 | 0.999 |            |           |
|        |              |              |                                              | 0.999 | 2.7                              |   |       | 2,281,261  | 1,270,331 |
| E1BK9  | E1BK9_BOVIN  | ARFGEF2      | Uncharacterized protein                      | 0.999 | LGRQAASSEEQAR                    | 3 | 0.999 |            |           |
|        |              |              |                                              | 0.999 | 1.4                              |   |       | 2,417,383  | 336,334   |
| E1BKJ5 | E1BKJ5_BOVIN | Bt.45950     | Uncharacterized protein                      | 0.961 | FNKVMYAVVDQDFCEKEFVSALR          | 3 | 0.999 |            |           |
|        |              |              |                                              | 0.961 | 0.6                              |   |       | 1,655,894  | 365,005   |

|          |              |             |                                                  |       |  |                                    |   |       |           |         |             |            |
|----------|--------------|-------------|--------------------------------------------------|-------|--|------------------------------------|---|-------|-----------|---------|-------------|------------|
|          |              |             |                                                  |       |  | LNVAIFRFDINDATGDLDANR              | 3 | 0.827 |           |         |             |            |
| E1BKJ6   | E1BKJ6_BOVIN | Bt.106336   | Uncharacterized protein                          | 0.999 |  | 4.1                                |   |       | 1,461,433 | 283,571 |             |            |
|          |              |             |                                                  |       |  | GERELPNHSMICPKAAGAPAAPAPALPGAPK    | 3 | 0.999 |           |         | 14,070,092  | 1,445,175  |
| E1BKJ9   | E1BKJ9_BOVIN | EMID2       | Uncharacterized protein                          | 0.999 |  | 5.9                                |   |       |           |         |             |            |
|          |              |             |                                                  |       |  | PTGPAGPPGTGPPGPAGPPGSKGDR          | 3 | 0.999 |           |         | 4,268,413   | 250,199    |
| E1BKM5   | E1BKM5_BOVIN | RECQL5      | Uncharacterized protein                          | 1.000 |  | 1.6                                |   |       |           |         | 5,039,696   | 894,523    |
|          |              |             |                                                  |       |  | GVNAKAYHAGLKAPER                   | 3 | 0.999 |           |         | 2,645,021   | 465,270    |
| E1BKM8   | E1BKM8_BOVIN | Bt.106031   | Uncharacterized protein                          | 0.999 |  | 6.7                                |   |       |           |         | 19,048,127  | 589,522    |
|          |              |             |                                                  |       |  | MKLGSFDSVHLSGPCLLALYRATESAHPQR     | 3 | 0.999 |           |         |             |            |
| E1BKM9   | E1BKM9_BOVIN | ZMYM3       | Uncharacterized protein                          | 0.999 |  | 1.9                                |   |       |           |         |             |            |
|          |              |             |                                                  |       |  | IKEDILACSAELINYLGAQFVREITR         | 3 | 0.999 |           |         |             |            |
| E1BKN0   | E1BKN0_BOVIN | Bt.8035     | Uncharacterized protein                          | 1.000 |  | 4.7                                |   |       |           |         |             |            |
|          |              |             |                                                  |       |  | DALAPGPFASFPPNGWTGKQK              | 3 | 0.999 |           |         |             |            |
|          |              |             |                                                  |       |  | GGGAAGPGGAEPGEDTALLRLLGLHR         | 3 | 0.999 |           |         |             |            |
| E1BKN1   | E1BKN1_BOVIN | RRP1B       | Uncharacterized protein                          | 0.999 |  | 4.5                                |   |       |           |         | 2,629,090   | 404,632    |
|          |              |             |                                                  |       |  | ELGALLVNGSGPPVLAWFLPQREGPPANPADRR  | 3 | 0.999 |           |         | 9,649,034   | 4,774,029  |
| E1BKN6   | E1BKN6_BOVIN | ANKRD12     | Uncharacterized protein                          | 0.999 |  | 1.8                                |   |       |           |         |             |            |
|          |              |             |                                                  |       |  | DRFNAROFMSWLQDVEDDK                | 3 | 0.999 |           |         |             |            |
|          |              |             |                                                  |       |  | VSRVPPQVQSFLSLOAK                  | 3 | 0.999 |           |         |             |            |
| E1BKP2   | E1BKP2_BOVIN | LENG9       | Uncharacterized protein (Fragment                | 0.999 |  | 2.2                                |   |       |           |         | 10,629,371  | 2,713,790  |
|          |              |             |                                                  |       |  | LSQRLEAEGLR                        | 3 | 0.999 |           |         |             |            |
| E1BKQ6   | E1BKQ6_BOVIN | MYO18A      | Uncharacterized protein                          | 0.999 |  | 1.4                                |   |       |           |         | 1,877,067   | 394,418    |
|          |              |             |                                                  |       |  | QELQEKLOALQSQVFELEQSMVDKSLVSR      | 3 | 0.999 |           |         | 5,701,678   | 458,248    |
| E1BKQ9   | E1BKQ9_BOVIN | GALNT5      | Uncharacterized protein                          | 0.999 |  | 4.6                                |   |       |           |         |             |            |
|          |              |             |                                                  |       |  | DPKAPGGFGRPVVPVPHGK                | 3 | 0.999 |           |         |             |            |
|          |              |             |                                                  |       |  | TPFIAARGTPLAKISVHTGPVGINK          | 3 | 0.999 |           |         |             |            |
| E1BKR6   | E1BKR6_BOVIN | ABCC8       | Uncharacterized protein                          | 0.999 |  | 0.9                                |   |       |           |         | 688,769     | 89,156     |
|          |              |             |                                                  |       |  | TSGSKSSFLAFFR                      | 3 | 0.999 |           |         |             |            |
| E1BKS0   | E1BKS0_BOVIN | Bt.105467   | Uncharacterized protein                          | 0.999 |  | 5.2                                |   |       |           |         | 4,599,292   | 665,863    |
|          |              |             |                                                  |       |  | MSTTSGPEASLKQSAK                   | 3 | 0.999 |           |         |             |            |
|          |              |             |                                                  |       |  | PPSGAEYTVLQKIKYAFSLAR              | 3 | 0.888 |           |         |             |            |
| E1BKS3   | E1BKS3_BOVIN | TNIP2       | Uncharacterized protein (Fragment                | 1.000 |  | 8.6                                |   |       |           |         | 4,888,633   | 909,775    |
|          |              |             |                                                  |       |  | QGGQGQTAGEQSPKCTEGDASVHAVVEK       | 3 | 0.999 |           |         |             |            |
| E1BKT3   | E1BKT3_BOVIN | ERBB2IP     | Uncharacterized protein                          | 0.974 |  | 1.1                                |   |       |           |         | 18,575,708  | 1,095,404  |
|          |              |             |                                                  |       |  | TEPHDTSSVDVGHSK                    | 3 | 0.857 |           |         |             |            |
| E1BKT4   | E1BKT4_BOVIN | Bt.64781    | Uncharacterized protein                          | 0.999 |  | 1.4                                |   |       |           |         | 3,586,399   | 484,088    |
|          |              |             |                                                  |       |  | DLSSDNNSQEDSENESCPYPFKSSGPEK       | 3 | 0.999 |           |         |             |            |
| E1BKV9   | E1BKV9_BOVIN | ERCC4       | Uncharacterized protein                          | 0.999 |  | 2.8                                |   |       |           |         | 1,198,349   | 261,642    |
|          |              |             |                                                  |       |  | CHNPSLEVEDLSLENAIGKPFDKTIR         | 3 | 0.999 |           |         | 31,723,188  | 5,457,427  |
| E1BKW7   | E1BKW7_BOVIN |             | Uncharacterized protein                          | 0.999 |  | 1.3                                |   |       |           |         |             |            |
|          |              |             |                                                  |       |  | ELSKDTGMSTQLINVACK                 | 3 | 0.999 |           |         |             |            |
|          |              |             |                                                  |       |  | LMETLGOAEPPYVKICIR                 | 3 | 0.999 |           |         |             |            |
| E1BKX3   | E1BKX3_BOVIN | MYBBP1A     | Uncharacterized protein                          | 0.999 |  | 1.5                                |   |       |           |         | 452,787     | 81,768     |
|          |              |             |                                                  |       |  | SEKDTKEAPGATQSQSPVSMK              | 3 | 0.999 |           |         |             |            |
| E1BKX4   | E1BKX4_BOVIN | LOC783463   | Uncharacterized protein                          | 0.999 |  | 3.8                                |   |       |           |         | 1,798,429   | 244,819    |
|          |              |             |                                                  |       |  | KHLKPVAAPK                         | 3 | 0.999 |           |         |             |            |
| E1BKX9   | E1BKX9_BOVIN | CDKL5       | Uncharacterized protein (Fragment                | 0.999 |  | 2.0                                |   |       |           |         | 1,294,511   | 111,454    |
|          |              |             |                                                  |       |  | SVSNLSEARAJAESSTR                  | 3 | 0.999 |           |         |             |            |
| E1BKY4   | E1BKY4_BOVIN | ITSN1       | Uncharacterized protein                          | 1.000 |  | 1.1                                |   |       |           |         | 1,754,646   | 116,837    |
|          |              |             |                                                  |       |  | ELYGFLNDFLLLTQIKI                  | 3 | 0.999 |           |         |             |            |
| E1BL04   | E1BL04_BOVIN | XIRP2       | Uncharacterized protein                          | 0.999 |  | 0.9                                |   |       |           |         | 293,436,646 | 24,148,153 |
|          |              |             |                                                  |       |  | NIKQESRSFK                         | 3 | 0.894 |           |         |             |            |
|          |              |             |                                                  |       |  | WLFEQPTLDLSIKHFSNMEEVER            | 3 | 0.999 |           |         |             |            |
| E1BL19   | E1BL19_BOVIN | GPBP1L1     | Uncharacterized protein                          | 0.999 |  | 2.5                                |   |       |           |         | 3,888,896   | 1,059,096  |
|          |              |             |                                                  |       |  | MEHKSGLPSCSR                       | 3 | 0.999 |           |         |             |            |
| E1BL35   | E1BL35_BOVIN | Bt.64988    | Uncharacterized protein                          | 0.999 |  | 1.7                                |   |       |           |         | 312,967     | 50,080     |
| F1MSL0   | F1MSL0_BOVIN | Bt.64988    | Uncharacterized protein                          | 0.999 |  | 1.3                                |   |       |           |         | 312,967     | 50,080     |
| F6PN06   | F6PN06_BOVIN | Bt.64988    | Uncharacterized protein                          | 0.999 |  | 1.6                                |   |       |           |         | 312,967     | 50,080     |
| Q17R13   | ACK1_BOVIN   | TNK2        | Activated CDC42 kinase 1                         | 0.999 |  | 1.3                                |   |       |           |         | 312,967     | 50,080     |
| Q17R13-2 | ACK1_BOVIN   | TNK2        | Isoform 2 of Activated CDC42 kinase 1            | 0.999 |  | 1.5                                |   |       |           |         | 312,967     | 50,080     |
|          |              |             |                                                  |       |  | KHQGHFLLTLSR                       | 3 | 0.999 |           |         |             |            |
| E1BL67   | E1BL67_BOVIN | OSBPL2      | Oxysterol-binding protein                        | 0.999 |  | 3.8                                |   |       |           |         | 4,167,157   | 278,770    |
|          |              |             |                                                  |       |  | PDIRGMENGNMDLASQEK                 | 3 | 0.999 |           |         |             |            |
| E1BL68   | E1BL68_BOVIN | MPP2        | Uncharacterized protein                          | 0.999 |  | 4.0                                |   |       |           |         | 6,391,859   | 615,461    |
|          |              |             |                                                  |       |  | AMNRAALESQVSTKQLTEADLR             | 3 | 0.999 |           |         |             |            |
| E1BL87   | E1BL87_BOVIN | Bt.83972    | Uncharacterized protein                          | 0.961 |  | 2.8                                |   |       |           |         | 3,642,954   | 382,048    |
|          |              |             |                                                  |       |  | RSEPPSSSSGGVMEQHLVQHHR             | 3 | 0.874 |           |         |             |            |
| E1BLA0   | E1BLA0_BOVIN | Bt.61077    | Uncharacterized protein                          | 0.999 |  | 1.1                                |   |       |           |         | 1,714,615   | 711,958    |
| F1N5Y0   | F1N5Y0_BOVIN | Bt.61077    | Uncharacterized protein                          | 0.999 |  | 1.2                                |   |       |           |         | 1,714,615   | 711,958    |
|          |              |             |                                                  |       |  | HVTDTQPTQONESK                     | 3 | 0.999 |           |         |             |            |
| E1BLA5   | E1BLA5_BOVIN | ARHGEF33    | Uncharacterized protein                          | 0.999 |  | 1.6                                |   |       |           |         | 2,975,392   | 414,506    |
|          |              |             |                                                  |       |  | WPROGVLGDLFLK                      | 3 | 0.999 |           |         |             |            |
| E1BLA6   | E1BLA6_BOVIN | LOC616223   | Uncharacterized protein                          | 0.999 |  | 18.2                               |   |       |           |         | 5,269,444   | 511,645    |
| G3MY56   | G3MY56_BOVIN | LOC616223   | Uncharacterized protein (Fragment                | 0.999 |  | 17.6                               |   |       |           |         | 5,269,444   | 511,645    |
|          |              |             |                                                  |       |  | KVSLDTIYPSGLAALHEAVLSGNLECVK       | 3 | 0.999 |           |         |             |            |
| E1BLB1   | E1BLB1_BOVIN | SHPRH       | Uncharacterized protein                          | 0.999 |  | 1.5                                |   |       |           |         | 2,915,568   | 364,298    |
|          |              |             |                                                  |       |  | IQLRDPGAKALVFSWQDVLDIISK           | 3 | 0.999 |           |         |             |            |
| E1BLB4   | E1BLB4_BOVIN | Bt.67656    | Uncharacterized protein (Fragment                | 1.000 |  | 1.1                                |   |       |           |         | 6,620,792   | 820,667    |
|          |              |             |                                                  |       |  | SCGNIYKGLAQTGAWGCFDEFNR            | 3 | 0.999 |           |         |             |            |
|          |              |             |                                                  |       |  | SIAAMESIMDLCKSLFEVSPDYK            | 3 | 0.999 |           |         |             |            |
| E1BLB5   | E1BLB5_BOVIN | Bt.41526    | Uncharacterized protein                          | 0.999 |  | 2.7                                |   |       |           |         | 1,987,979   | 171,549    |
|          |              |             |                                                  |       |  | VKAPGGGFPSPGRESHR                  | 3 | 0.999 |           |         |             |            |
| E1BLB6   | E1BLB6_BOVIN | Bt.11314    | Uncharacterized protein                          | 0.999 |  | 0.8                                |   |       |           |         | 887,301     | 123,633    |
|          |              |             |                                                  |       |  | FSSKDPNSKDNSVGQLLQIVMANNLPYDPK     | 3 | 0.999 |           |         |             |            |
| E1BLB8   | E1BLB8_BOVIN | NABP3       | Uncharacterized protein                          | 0.999 |  | 4.4                                |   |       |           |         | 47,749,000  | 925,284    |
|          |              |             |                                                  |       |  | PSVFKPASGTGKGFSLMQLAAHK            | 3 | 0.999 |           |         |             |            |
| E1BLD1   | E1BLD1_BOVIN | Bt.76331    | Uncharacterized protein                          | 0.999 |  | 1.9                                |   |       |           |         | 2,757,569   | 222,085    |
|          |              |             |                                                  |       |  | DCLYIWSDAAAELSNNGSNGWFRFLDGK       | 3 | 0.999 |           |         |             |            |
|          |              |             |                                                  |       |  | MGCWSIHEVQYLTDELTPK                | 3 | 0.999 |           |         |             |            |
| E1BLD4   | E1BLD4_BOVIN | RBM28       | Uncharacterized protein                          | 0.999 |  | 1.9                                |   |       |           |         | 1,970,140   | 90,344     |
| G3MZL2   | G3MZL2_BOVIN | RBM28       | Uncharacterized protein                          | 0.999 |  | 2.3                                |   |       |           |         | 1,970,140   | 90,344     |
|          |              |             |                                                  |       |  | TVAVDWAVAKDKYK                     | 3 | 0.999 |           |         |             |            |
| E1BLE5   | E1BLE5_BOVIN | IL1F7       | Uncharacterized protein                          | 0.999 |  | 4.4                                |   |       |           |         | 9,411,467   | 917,947    |
|          |              |             |                                                  |       |  | KHTEFSFRR                          | 3 | 0.999 |           |         |             |            |
| E1BLK1   | E1BLK1_BOVIN | Bt.37913    | Uncharacterized protein                          | 0.999 |  | 0.9                                |   |       |           |         | 10,279,404  | 3,040,724  |
|          |              |             |                                                  |       |  | LMESMAAEEDFEFNGQSSSFSEDEHLPR       | 3 | 0.999 |           |         |             |            |
| E1BLM8   | E1BLM8_BOVIN | GPR111      | Uncharacterized protein                          | 0.999 |  | 2.7                                |   |       |           |         | 4,466,038   | 555,666    |
|          |              |             |                                                  |       |  | ISENVSSDFSRHPTKGPS                 | 3 | 0.999 |           |         |             |            |
| E1BLP6   | ARI5B_BOVIN  | ARID5B      | AT-rich interactive domain-containing protein 5f | 0.999 |  | 3.0                                |   |       |           |         | 600,367     | 95,077     |
| G5E585   | G5E585_BOVIN | ARID5B      | Uncharacterized protein                          | 0.999 |  | 3.1                                |   |       |           |         | 600,367     | 95,077     |
|          |              |             |                                                  |       |  | GPAPPLASAPLAPTGTGKQSLTSPSALVDSKEPK | 3 | 0.999 |           |         |             |            |
| E1BLR9   | E1BLR9_BOVIN | Bt.65095    | Uncharacterized protein                          | 0.999 |  | 1.4                                |   |       |           |         | 1,756,045   | 127,254    |
|          |              |             |                                                  |       |  | QVLVYLARELAAGYR                    | 3 | 0.999 |           |         |             |            |
| E1BLS0   | E1BLS0_BOVIN | SLC35B3     | Uncharacterized protein                          | 0.999 |  | 4.0                                |   |       |           |         | 299,470,067 | 6,990,223  |
|          |              |             |                                                  |       |  | CCKLIPVMLGGVFIQK                   | 3 | 0.999 |           |         |             |            |
| E1BLS3   | E1BLS3_BOVIN | Bt.105495   | Uncharacterized protein                          | 0.999 |  | 1.2                                |   |       |           |         | 2,325,242   | 218,258    |
|          |              |             |                                                  |       |  | FASSPLKVLESHR                      | 3 | 0.999 |           |         |             |            |
| E1BLT3   | E1BLT3_BOVIN | SPTBN4      | Uncharacterized protein                          | 0.999 |  | 1.0                                |   |       |           |         | 2,000,517   | 211,154    |
|          |              |             |                                                  |       |  | NQEMALSGOELPGETVESVEALKRHR         | 3 | 0.999 |           |         |             |            |
| E1BLV9   | E1BLV9_BOVIN | Bt.20503    | Uncharacterized protein                          | 0.999 |  | 3.2                                |   |       |           |         | 30,346,286  | 8,694,011  |
| G3N322   | G3N322_BOVIN | Bt.20503    | Uncharacterized protein                          | 0.999 |  | 3.2                                |   |       |           |         | 30,346,286  | 8,694,011  |
|          |              |             |                                                  |       |  | PPTTGGSEGMAAPHCPPSAGGWVGLSPGGSR    | 3 | 0.999 |           |         |             |            |
| E1BLX6   | E1BLX6_BOVIN | Bt.50823    | Uncharacterized protein                          | 0.999 |  | 7.2                                |   |       |           |         | 1,570,346   | 184,787    |
| Q32LB8   | Q32LB8_BOVIN | C21H15ORF26 | Chromosome 15 open reading frame 26 ortholog     | 0.999 |  | 6.6                                |   |       |           |         | 1,570,346   | 184,787    |
|          |              |             |                                                  |       |  | IPVGRNTFILAAGEVIGQVLR              | 3 | 0.999 |           |         |             |            |
| E1BLY0   | E1BLY0_BOVIN | TBX2        | Uncharacterized protein                          | 0.999 |  | 2.2                                |   |       |           |         | 2,449,179   | 187,613    |
|          |              |             |                                                  |       |  | AKYILLMDIVAADDQR                   | 3 | 0.999 |           |         |             |            |
| E1BM00   | E1BM00_BOVIN | ZCCHC14     | Uncharacterized protein                          | 0.999 |  | 1.6                                |   |       |           |         | 19,428,393  | 505,856    |
|          |              |             |                                                  |       |  | QPSMDFNROGTFRLK                    | 3 | 0.999 |           |         |             |            |
| E1BM04   | E1BM04_BOVIN | TBKP1       | Uncharacterized protein                          | 0.999 |  | 5.9                                |   |       |           |         | 8,544,188   | 915,911    |
|          |              |             |                                                  |       |  | AODLASNSERDMAWVKR                  | 3 | 0.999 |           |         |             |            |
|          |              |             |                                                  |       |  | VSLQQRNLQFOHELQKMK                 | 3 | 0.999 |           |         |             |            |
| E1BM19   | E1BM19_BOVIN | Bt.87603    | Uncharacterized protein                          | 0.999 |  | 4.7                                |   |       |           |         | 662,381     | 153,337    |
|          |              |             |                                                  |       |  | KIHLVFEDIDHTVDELOHYCHGLESKR        | 3 | 0.999 |           |         |             |            |
| E1BM20   | E1BM20_BOVIN | Bt.106201   | Uncharacterized protein                          | 0.999 |  | 3.1                                |   |       |           |         | 1,564,158   | 193,662    |

|        |              |           |                                    |       |                                    |   |       |             |           |
|--------|--------------|-----------|------------------------------------|-------|------------------------------------|---|-------|-------------|-----------|
|        |              |           |                                    |       | QAINDGVVSTEELSTRDCELYR             | 3 | 0.999 |             |           |
| E1BM23 | E1BM23_BOVIN | ARHGAP5   | Uncharacterized protein            | 0.999 | 1.3                                |   |       | 4,537,004   | 551,493   |
|        |              |           |                                    |       | LMYICTDQLGLEDFEQK                  | 3 | 0.999 | 6,199,399   | 435,435   |
| E1BM25 | E1BM25_BOVIN | C10orf93  | Uncharacterized protein            | 0.999 | 2.0                                |   |       |             |           |
|        |              |           |                                    |       | GFDGWHSGVSGKK                      | 3 | 0.999 |             |           |
|        |              |           |                                    |       | IKTYTREAVELQFLAER                  | 3 | 0.999 |             |           |
| E1BM39 | E1BM39_BOVIN | CUL9      | Uncharacterized protein            | 0.999 | 0.7                                |   |       | 4,365,821   | 206,996   |
| E1BM41 | E1BM41_BOVIN | VPS39     | Uncharacterized protein            | 0.999 | 3.3                                |   |       | 2,532,977   | 271,880   |
|        |              |           |                                    |       | LIPVPMATQIQQLLQDKQFELALQLAEMK      | 3 | 0.999 |             |           |
| E1BM47 | E1BM47_BOVIN | HEATR7B2  | Uncharacterized protein            | 0.999 | 1.1                                |   |       | 3,392,100   | 258,884   |
|        |              |           |                                    |       | LTEEERMKGAFCVALEK                  | 3 | 0.999 |             |           |
| E1BM50 | E1BM50_BOVIN | Bt.51428  | Uncharacterized protein (Fragment) | 0.999 | 4.1                                |   |       | 1,033,905   | 176,091   |
|        |              |           |                                    |       | TYSMEGPEPDIAPRALQSLFQEMGTGGQHR     | 3 | 0.999 |             |           |
| E1BM64 | E1BM64_BOVIN | Bt.88821  | Uncharacterized protein            | 0.999 | 2.6                                |   |       | 832,226     | 375,415   |
|        |              |           |                                    |       | ATWEPIGDLFIDSLPEHIQALKLFK          | 3 | 0.999 |             |           |
| E1BM66 | E1BM66_BOVIN | Bt.33266  | Uncharacterized protein            | 0.999 | 1.0                                |   |       | 2,486,030   | 765,183   |
|        |              |           |                                    |       | IANSLTGPSTAPGSLFSSCAKNTAKK         | 3 | 0.999 |             |           |
| E1BM83 | E1BM83_BOVIN | FAM179B   | Uncharacterized protein            | 1.000 | 2.6                                |   |       | 16,069,284  | 3,619,420 |
|        |              |           |                                    |       | ALFTQMGONLLNOAASQPSHK              | 3 | 0.999 |             |           |
|        |              |           |                                    |       | SSYSGFNPSSGVALLPSYPLSSPR           | 3 | 0.999 |             |           |
| E1BM89 | E1BM89_BOVIN | 100139817 | Uncharacterized protein            | 0.999 | 3.0                                |   |       | 2,822,625   | 724,742   |
|        |              |           |                                    |       | EPFSDVHSRLGVPRQDVK                 | 3 | 0.999 |             |           |
| E1BM96 | E1BM96_BOVIN | MAGI3     | Uncharacterized protein            | 1.000 | 1.2                                |   |       | 1,822,158   | 230,411   |
|        |              |           |                                    |       | AIELIQAAGNKVLLLLR                  | 3 | 0.999 |             |           |
| E1BM97 | E1BM97_BOVIN | Bt.94610  | Uncharacterized protein            | 0.999 | 2.4                                |   |       | 1,174,182   | 199,791   |
|        |              |           |                                    |       | SSKEMKLDGSYFGEICLLTK               | 3 | 0.999 |             |           |
| E1BMA2 | E1BMA2_BOVIN | KCNH6     | Uncharacterized protein            | 0.999 | 2.1                                |   |       | 1,519,721   | 379,240   |
|        |              |           |                                    |       | YPSLPEHLSSVPKOLEFOR                | 3 | 0.999 |             |           |
| E1BMD1 | E1BMD1_BOVIN | Bt.97876  | Uncharacterized protein            | 0.999 | 1.7                                |   |       | 122,098,058 | 2,966,961 |
|        |              |           |                                    |       | TVLQCMNGVGVVATNIPYEVVAFSDRR        | 3 | 0.999 |             |           |
| E1BME6 | E1BME6_BOVIN | Bt.105862 | Uncharacterized protein (Fragment) | 0.999 | 1.8                                |   |       | 1,931,794   | 178,954   |
|        |              |           |                                    |       | VEMESQIYAIPEDIR                    | 3 | 0.999 |             |           |
| E1BMF1 | E1BMF1_BOVIN | TM9SF3    | Uncharacterized protein            | 0.999 | 2.7                                |   |       | 2,797,654   | 292,629   |
|        |              |           |                                    |       | EEVLLWMTVGPYHNR                    | 3 | 0.999 |             |           |
| E1BMF6 | E1BMF6_BOVIN |           | Uncharacterized protein            | 0.999 | 2.7                                |   |       | 4,631,932   | 339,277   |
|        |              |           |                                    |       | ELMDKFLRVNFSK                      | 3 | 0.999 |             |           |
|        |              |           |                                    |       | FLRVNFSKGCPLFTTLK                  | 3 | 0.999 |             |           |
| E1BMG2 | E1BMG2_BOVIN | Bt.65326  | Uncharacterized protein            | 1.000 | 2.3                                |   |       | 10,735,835  | 787,365   |
|        |              |           |                                    |       | HLMFYQDDVEVETGQLGSGGVSNSGKMK       | 3 | 0.866 |             |           |
|        |              |           |                                    |       | LKVQLFETQR                         | 3 | 1.000 |             |           |
|        |              |           |                                    |       | LTSTQSLVEDESILVLSKTKK              | 3 | 0.871 |             |           |
|        |              |           |                                    |       | MGTTYGPPAGKK                       | 2 | 0.913 |             |           |
|        |              |           |                                    |       | PLLIEDVGEELDPALDNLERNFIKTGSTFK     | 3 | 0.999 |             |           |
| E1BMG8 | E1BMG8_BOVIN | DOCK4     | Uncharacterized protein            | 0.999 | 2.8                                |   |       | 8,240,614   | 901,709   |
|        |              |           |                                    |       | SDPNLSAPEKAVNFTPSSWLSDSGKEAK       | 3 | 0.999 |             |           |
|        |              |           |                                    |       | SVLEIIDIVASLLDILLRILEITSR          | 3 | 0.999 |             |           |
| E1BMG9 | E1BMG9_BOVIN | Bt.52387  | Uncharacterized protein            | 0.999 | 2.6                                |   |       | 394,977     | 65,211    |
| F1N1T5 | F1N1T5_BOVIN | Bt.52387  | Uncharacterized protein            | 0.999 | 2.6                                |   |       | 394,977     | 65,211    |
|        |              |           |                                    |       | DKGADPLGLAQEQDGVVPVFKFPR           | 3 | 0.999 |             |           |
| E1BMH5 | E1BMH5_BOVIN | Bt.60929  | Uncharacterized protein            | 0.999 | 3.8                                |   |       | 2,109,555   | 138,436   |
| E1BMT0 | E1BMT0_BOVIN | Bt.60929  | Uncharacterized protein            | 0.999 | 3.8                                |   |       | 2,109,555   | 138,436   |
| F1MXC3 | F1MXC3_BOVIN | Bt.60929  | Uncharacterized protein            | 0.999 | 3.8                                |   |       | 2,109,555   | 138,436   |
| Q27ID4 | TERT_BOVIN   | TERT      | Telomerase reverse transcriptase   | 0.999 | 3.8                                |   |       | 2,109,555   | 138,436   |
|        |              |           |                                    |       | IWSQLGRIGVROHLDR                   | 3 | 0.999 |             |           |
|        |              |           |                                    |       | RSFLLCSLPPSLAGARTLVETIFLDSK        | 3 | 0.999 |             |           |
| E1BMI4 | E1BMI4_BOVIN | UXS1      | Uncharacterized protein            | 0.999 | 4.8                                |   |       | 1,464,197   | 223,253   |
|        |              |           |                                    |       | AIHFRKLEYQANNQYIPK                 | 3 | 0.999 |             |           |
| P50448 | F12A1_BOVIN  |           | Factor XIIa inhibitor              | 1.000 | 5.6                                |   |       | 2,336,574   | 141,123   |
| E1BMJ0 | E1BMJ0_BOVIN | SERPING1  | Uncharacterized protein            | 1.000 | 5.6                                |   |       | 2,336,574   | 141,123   |
|        |              |           |                                    |       | HHLQDLEQALSTAVFK                   | 3 | 1.000 |             |           |
|        |              |           |                                    |       | KYPVASFTDR                         | 2 | 0.967 |             |           |
| E1BPU0 | E1BPU0_BOVIN | Bt.106414 | Uncharacterized protein            | 0.999 | 0.6                                |   |       | 3,067,279   | 125,821   |
| E1BMJ1 | E1BMJ1_BOVIN | Bt.36230  | Uncharacterized protein            | 0.999 | 0.8                                |   |       | 3,067,279   | 125,821   |
|        |              |           |                                    |       | PRMLVLMELASKGLDR                   | 3 | 0.999 |             |           |
| E1BMM7 | E1BMM7_BOVIN | Bt.22058  | Uncharacterized protein            | 0.999 | 2.9                                |   |       | 2,522,591   | 697,817   |
|        |              |           |                                    |       | KSYYFFGLLQGLSLFNCNADIPPLALFK       | 3 | 0.999 |             |           |
| E1BMN2 | E1BMN2_BOVIN | DIAPH3    | Uncharacterized protein            | 0.977 | 4.1                                |   |       | 6,305,351   | 942,544   |
|        |              |           |                                    |       | IFPPPEDLHKFVTKMSIFISAK             | 3 | 0.866 |             |           |
|        |              |           |                                    |       | LIDECVSQVLRHDMDFPTYRK              | 3 | 0.831 |             |           |
| E1BMN5 | E1BMN5_BOVIN | SPTBN2    | Uncharacterized protein            | 0.999 | 0.7                                |   |       | 3,197,288   | 292,933   |
|        |              |           |                                    |       | LLEVLSETLPKPTKGR                   | 3 | 0.999 |             |           |
| E1BMN6 | E1BMN6_BOVIN | Bt.36123  | Uncharacterized protein            | 0.999 | 4.6                                |   |       | 2,050,517   | 209,719   |
|        |              |           |                                    |       | KALVLCAGYALLVLTMLNLLDYK            | 3 | 0.999 |             |           |
| E1BMN9 | E1BMN9_BOVIN | BSN       | Uncharacterized protein            | 0.999 | 1.1                                |   |       | 20,988,788  | 8,131,465 |
|        |              |           |                                    |       | PAAAKGPTGGPPRPPELPAAGAAR           | 3 | 0.999 |             |           |
|        |              |           |                                    |       | PSRASEPSRTPSSAQEK                  | 3 | 0.999 |             |           |
| E1BMP2 | E1BMP2_BOVIN | SEC31A    | Uncharacterized protein            | 1.000 | 2.9                                |   |       | 4,723,994   | 323,985   |
|        |              |           |                                    |       | FASSPLRVLENHAR                     | 3 | 0.999 |             |           |
|        |              |           |                                    |       | LLTLGVNESEHYLSNINSFK               | 3 | 0.999 |             |           |
| E1BMP8 | E1BMP8_BOVIN | SBNO1     | Uncharacterized protein            | 0.999 | 6.2                                |   |       | 6,428,439   | 1,630,772 |
|        |              |           |                                    |       | AGFLIGDAGVGKGRITAGIYENYLLSR        | 3 | 0.999 |             |           |
|        |              |           |                                    |       | DVRGGLIGVGLINVEDRSGILTDK           | 3 | 0.999 |             |           |
|        |              |           |                                    |       | LAEDLPNTLDLDELGGPVENAEMTGRKGR      | 3 | 0.999 |             |           |
| E1BMP9 | E1BMP9_BOVIN | ZAP70     | Uncharacterized protein            | 0.999 | 3.9                                |   |       | 341,313     | 97,491    |
|        |              |           |                                    |       | EPGYALSIFYKTVVHYLISQDK             | 3 | 0.999 |             |           |
| E1BMQ0 | E1BMQ0_BOVIN | Bt.67284  | Uncharacterized protein            | 1.000 | 4.2                                |   |       | 1,394,971   | 179,369   |
| F1MRSS | F1MRSS_BOVIN | Bt.67284  | Uncharacterized protein            | 1.000 | 4.5                                |   |       | 1,394,971   | 179,369   |
|        |              |           |                                    |       | TRDIQPPRPPPTATSPTPAPEHP            | 3 | 0.999 |             |           |
| E1BMO2 | E1BMO2_BOVIN | RUFY2     | Uncharacterized protein (Fragment) | 0.999 | 3.5                                |   |       | 2,011,946   | 557,731   |
| F1MEH0 | F1MEH0_BOVIN | RUFY2     | Uncharacterized protein (Fragment) | 0.999 | 3.5                                |   |       | 2,011,946   | 557,731   |
|        |              |           |                                    |       | VDSLKSNTKLIEELIAIK                 | 3 | 0.999 |             |           |
| E1BMR3 | E1BMR3_BOVIN | RBL1      | Uncharacterized protein            | 0.999 | 5.2                                |   |       | 5,527,616   | 1,257,024 |
|        |              |           |                                    |       | IAPSSSITAENISIPGHSLLTMATAIVAGTTGHK | 3 | 0.999 |             |           |
|        |              |           |                                    |       | QOPGSPRRISQOHSIYVSPHK              | 3 | 0.999 |             |           |
| E1BMS9 | E1BMS9_BOVIN | PHF20     | Uncharacterized protein            | 0.999 | 3.0                                |   |       | 1,748,521   | 720,215   |
|        |              |           |                                    |       | GGEGLLSQHWQFNLLTHVESLQDEVTHR       | 3 | 0.999 |             |           |
| E1BMX1 | E1BMX1_BOVIN |           | Uncharacterized protein            | 0.999 | 9.9                                |   |       | 253,567     | 35,564    |
| G5E645 | G5E645_BOVIN |           | Uncharacterized protein            | 0.999 | 18.9                               |   |       | 253,567     | 35,564    |
|        |              |           |                                    |       | MAPGPTLLGLALCLAQARTQQGTLFK         | 3 | 0.999 |             |           |
| E1BMZ4 | E1BMZ4_BOVIN | ZNF436    | Uncharacterized protein            | 0.999 | 2.8                                |   |       | 5,416,333   | 3,185,065 |
|        |              |           |                                    |       | NFSQNSDLVRHRR                      | 3 | 0.999 |             |           |
| E1BN15 | E1BN15_BOVIN | PGPEP1    | Uncharacterized protein            | 0.999 | 13.4                               |   |       | 1,360,515   | 322,506   |
|        |              |           |                                    |       | FCPGSQCCVEDGPESIDSIDMDAVCKR        | 3 | 0.999 |             |           |
| E1BN18 | E1BN18_BOVIN | DLL1      | Uncharacterized protein            | 0.999 | 3.3                                |   |       | 20,657,507  | 4,922,438 |
|        |              |           |                                    |       | CSDNPEGTYTRCPCPGFSGFNCEK           | 3 | 0.999 |             |           |
| E1BN23 | E1BN23_BOVIN | TRHDE     | Uncharacterized protein            | 0.999 | 2.2                                |   |       | 503,945     | 89,513    |
| G3N3P5 | G3N3P5_BOVIN | TRHDE     | Uncharacterized protein            | 0.999 | 6.0                                |   |       | 503,945     | 89,513    |
|        |              |           |                                    |       | FDECASVPSGADGGPAGFFAR              | 3 | 0.999 |             |           |
| E1BN35 | E1BN35_BOVIN | CYP27B1   | Uncharacterized protein            | 0.999 | 4.1                                |   |       | 16,540,300  | 9,080,674 |
|        |              |           |                                    |       | PQAAARYAGTLHGVRDLVR                | 3 | 0.999 |             |           |
|        |              |           |                                    |       | YAGTLHGVRDLVRR                     | 3 | 0.999 |             |           |
| E1BN65 | E1BN65_BOVIN | ZNF217    | Uncharacterized protein (Fragment) | 0.999 | 2.9                                |   |       | 1,380,556   | 185,827   |
|        |              |           |                                    |       | EVKEQPQGEQSTNDSCSDKEEPTGSK         | 3 | 0.999 |             |           |
| E1BNA8 | E1BNA8_BOVIN | Bt.26785  | Uncharacterized protein (Fragment) | 0.999 | 4.9                                |   |       | 3,325,396   | 558,179   |
|        |              |           |                                    |       | NILVGENNICKVGDGLARLIK              | 3 | 0.999 |             |           |
| E1BNC0 | E1BNC0_BOVIN |           | Uncharacterized protein            | 0.999 | 15.9                               |   |       | 2,531,092   | 135,303   |
|        |              |           |                                    |       | VRLRDEILSNGQLMVGVDVSGASYIK         | 3 | 0.999 |             |           |
| E1BNC2 | E1BNC2_BOVIN | KCTD3     | Uncharacterized protein            | 0.999 | 5.9                                |   |       | 11,269,718  | 7,580,185 |
|        |              |           |                                    |       | FRGMSTOPGSTPLASFK                  | 3 | 0.999 |             |           |
|        |              |           |                                    |       | LLDQCCLSTSRCATPNISPATSVVQHSRLR     | 3 | 0.999 |             |           |
| E1BNC3 | E1BNC3_BOVIN | Bt.80160  | Uncharacterized protein            | 0.999 | 1.8                                |   |       | 2,957,094   | 225,091   |
| F1N2K7 | F1N2K7_BOVIN | PIKfyve   | Uncharacterized protein            | 0.999 | 1.8                                |   |       | 2,957,094   | 225,091   |
|        |              |           |                                    |       | NRSASITNLSLDR                      | 3 | 0.999 |             |           |
|        |              |           |                                    |       | THPNCIVGKELNWLIRNGHIATR            | 3 | 0.999 |             |           |

|        |              |           |                                    |       |      |                                    |   |       |             |            |
|--------|--------------|-----------|------------------------------------|-------|------|------------------------------------|---|-------|-------------|------------|
| E1BND2 | E1BND2_BOVIN | BT65851   | Uncharacterized protein            | 0.999 | 1.5  |                                    |   |       | 8,734,150   | 654,268    |
| E1BND5 | E1BND5_BOVIN | NCOA6     | Uncharacterized protein            | 0.999 | 2.2  | TPVLPFGKGAATR                      | 3 | 0.999 |             |            |
|        |              |           |                                    |       |      | LDTILEVNPVLLHMGDOQESSKLKVKQ        | 3 | 0.999 | 132,461,587 | 24,660,699 |
|        |              |           |                                    |       |      | PPGLTDLEVTTPPGVSGEDPK              | 3 | 0.999 |             |            |
| E1BND6 | E1BND6_BOVIN | LRBA      | Uncharacterized protein (Fragment) | 0.999 | 1.0  |                                    |   |       | 690,003     | 102,320    |
| E1BNE2 | E1BNE2_BOVIN | CAND2     | Uncharacterized protein            | 0.999 | 1.8  | EGPCLHSMNGDLLRTLLEGPENCLKPK        | 3 | 0.999 |             |            |
| G3N157 | G3N157_BOVIN | CAND2     | Uncharacterized protein            | 0.999 | 1.7  |                                    |   |       | 6,860,579   | 683,425    |
|        |              |           |                                    |       |      | VGAGNLPDFLPFLGQMEAEPR              | 3 | 0.999 | 6,860,579   | 683,425    |
| E1BNE4 | E1BNE4_BOVIN | BTBD8     | Uncharacterized protein            | 0.959 | 2.7  |                                    |   |       | 598,038     | 71,003     |
| F1MRM6 | F1MRM6_BOVIN | BTBD8     | Uncharacterized protein            | 0.959 | 1.8  |                                    |   |       | 598,038     | 71,003     |
|        |              |           |                                    |       |      | SVSLDVCDDNNKGSVSEQKPHEPLNLTAK      | 3 | 0.892 |             |            |
| E1BNF3 | E1BNF3_BOVIN | FOXJ1     | Uncharacterized protein            | 0.999 | 4.8  |                                    |   |       | 1,672,643   | 138,257    |
|        |              |           |                                    |       |      | GGFWRIDPQYIERLLSGAFK               | 3 | 0.999 |             |            |
| E1BNF6 | E1BNF6_BOVIN | BL5804    | Uncharacterized protein (Fragment) | 1.000 | 1.2  |                                    |   |       | 1,209,640   | 252,438    |
| F1MRK2 | F1MRK2_BOVIN | BL5804    | Uncharacterized protein (Fragment) | 1.000 | 1.2  |                                    |   |       | 1,209,640   | 252,438    |
|        |              |           |                                    |       |      | QOEDEKALTASKGK                     | 3 | 0.999 |             |            |
|        |              |           |                                    |       |      | TAGEKTGEGPPVPEEKTEPASVPEEAK        | 3 | 0.999 |             |            |
| E1BNF9 | E1BNF9_BOVIN | BT.103903 | Uncharacterized protein            | 0.999 | 16.6 |                                    |   |       | 13,787,217  | 2,019,162  |
|        |              |           |                                    |       |      | LATVPEKEGHPATIMYTDPR               | 3 | 0.999 |             |            |
|        |              |           |                                    |       |      | PIQAGSFCADPGYPLEKASTSFCLLAK        | 3 | 0.999 |             |            |
| E1BNG3 | E1BNG3_BOVIN | ASCC3     | Uncharacterized protein            | 0.999 | 1.4  |                                    |   |       | 659,491     | 91,580     |
| G3MYK8 | G3MYK8_BOVIN | ASCC3     | Uncharacterized protein            | 0.999 | 9.1  |                                    |   |       | 659,491     | 91,580     |
|        |              |           |                                    |       |      | VLFGNLAFSDFMHLDFHDFELPINGESQK      | 3 | 0.999 |             |            |
| E1BNG7 | E1BNG7_BOVIN | TUBGCP3   | Uncharacterized protein            | 0.999 | 1.2  |                                    |   |       | 6,281,929   | 267,842    |
|        |              |           |                                    |       |      | DAHSTPYYYAR                        | 3 | 0.999 |             |            |
| E1BNH7 | E1BNH7_BOVIN | BT.105989 | Uncharacterized protein            | 0.999 | 3.8  |                                    |   |       | 2,797,243   | 479,012    |
|        |              |           |                                    |       |      | MDFSFSFMQGMGNTIQPPQLDISANIR        | 3 | 0.812 |             |            |
|        |              |           |                                    |       |      | TEPKQLHEDFCFCQGGGELVMCDR           | 3 | 0.999 |             |            |
| E1BNH9 | E1BNH9_BOVIN | OBSL1     | Uncharacterized protein            | 0.999 | 0.6  |                                    |   |       | 3,171,575   | 672,963    |
| F6QPC8 | F6QPC8_BOVIN | OBSL1     | Uncharacterized protein            | 0.999 | 1.8  |                                    |   |       | 3,171,575   | 672,963    |
|        |              |           |                                    |       |      | YRVEQHGLQHR                        | 3 | 0.999 |             |            |
| E1BNI5 | E1BNI5_BOVIN | SAMD15    | Uncharacterized protein            | 1.000 | 2.8  |                                    |   |       | 276,043     | 48,199     |
| G3N1Q5 | G3N1Q5_BOVIN | SAMD15    | Uncharacterized protein            | 1.000 | 2.8  |                                    |   |       | 276,043     | 48,199     |
| G3N2M8 | G3N2M8_BOVIN | SAMD15    | Uncharacterized protein            | 1.000 | 2.8  |                                    |   |       | 276,043     | 48,199     |
|        |              |           |                                    |       |      | KHGSGIKSDSLTSEFAR                  | 3 | 0.999 |             |            |
| E1BNJ1 | E1BNJ1_BOVIN | BT.53716  | Uncharacterized protein            | 1.000 | 1.1  |                                    |   |       | 4,269,485   | 927,672    |
|        |              |           |                                    |       |      | DHRDKLAAILR                        | 3 | 0.999 |             |            |
|        |              |           |                                    |       |      | WWTLAQGEITVFSRFK                   | 3 | 0.999 |             |            |
| E1BNJ5 | E1BNJ5_BOVIN | BAZ2B     | Uncharacterized protein            | 0.999 | 0.7  |                                    |   |       | 3,762,533   | 543,711    |
| F1MCP3 | F1MCP3_BOVIN | BAZ2B     | Uncharacterized protein            | 0.999 | 0.7  |                                    |   |       | 3,762,533   | 543,711    |
|        |              |           |                                    |       |      | KLQAGQIARQAQIK                     | 3 | 0.999 |             |            |
| E1BNJ8 | E1BNJ8_BOVIN | GPR113    | Uncharacterized protein            | 0.999 | 3.1  |                                    |   |       | 944,331     | 130,919    |
| E1BPC5 | E1BPC5_BOVIN | GPR113    | Uncharacterized protein            | 0.999 | 3.2  |                                    |   |       | 944,331     | 130,919    |
| G3MX74 | G3MX74_BOVIN | GPR113    | Uncharacterized protein            | 0.999 | 3.2  |                                    |   |       | 944,331     | 130,919    |
|        |              |           |                                    |       |      | TGMVKRPCPGDVGWGHISNCTDAGLLALLR     | 3 | 0.999 |             |            |
| E1BNK2 | E1BNK2_BOVIN | MLH3      | Uncharacterized protein            | 0.999 | 2.2  |                                    |   |       | 3,953,824   | 1,085,652  |
|        |              |           |                                    |       |      | LRSLAVCSLGGCVSELALNSIDAEAKCVAVR    | 3 | 0.999 |             |            |
| E1BNK7 | E1BNK7_BOVIN | PRTFDC1   | Uncharacterized protein (Fragment) | 0.999 | 15.5 |                                    |   |       | 1,058,063   | 242,379    |
|        |              |           |                                    |       |      | DIMKDIGCCDIMLVCLKGGYK              | 3 | 0.999 |             |            |
| E1BNL0 | E1BNL0_BOVIN | BT.20095  | Uncharacterized protein (Fragment) | 0.999 | 1.4  |                                    |   |       | 1,336,271   | 237,348    |
|        |              |           |                                    |       |      | RHPEPTLTPGSPAAETGEPLHCTR           | 3 | 0.999 |             |            |
| E1BNL6 | E1BNL6_BOVIN | GMEB2     | Uncharacterized protein            | 0.999 | 5.4  |                                    |   |       | 3,479,208   | 457,275    |
|        |              |           |                                    |       |      | VQDPLQLRDAVLLNNIVQNFGLDLVKK        | 3 | 0.999 |             |            |
| E1BNL7 | E1BNL7_BOVIN | PROSAPI1  | Uncharacterized protein            | 0.999 | 1.8  |                                    |   |       | 1,296,381   | 256,337    |
|        |              |           |                                    |       |      | QLQLSYVEMYQR                       | 3 | 0.999 |             |            |
| E1BNM4 | E1BNM4_BOVIN | ZNF282    | Uncharacterized protein            | 0.999 | 2.7  |                                    |   |       | 3,086,121   | 132,357    |
| G3MXN2 | G3MXN2_BOVIN | ZNF282    | Uncharacterized protein            | 0.999 | 2.3  |                                    |   |       | 3,086,121   | 132,357    |
|        |              |           |                                    |       |      | SKPYSCPECGKSGFVGR                  | 3 | 0.999 |             |            |
| E1BNN6 | E1BNN6_BOVIN | NLRP1     | Uncharacterized protein            | 0.999 | 1.2  |                                    |   |       | 3,067,751   | 1,051,031  |
|        |              |           |                                    |       |      | AEPGAVAAVFLPHFAFR                  | 3 | 0.999 |             |            |
| E1BNN7 | E1BNN7_BOVIN | 100137809 | Uncharacterized protein            | 0.999 | 4.4  |                                    |   |       | 854,351     | 104,034    |
| G5E627 | G5E627_BOVIN | 100137809 | Uncharacterized protein            | 0.999 | 4.4  |                                    |   |       | 854,351     | 104,034    |
|        |              |           |                                    |       |      | GYYYNGDVSGLPARLTLEFSAFDMSAPTAR     | 3 | 0.999 |             |            |
| E1BNR0 | E1BNR0_BOVIN | BT.23652  | Uncharacterized protein            | 1.000 | 7.0  |                                    |   |       | 61,886,012  | 7,759,120  |
|        |              |           |                                    |       |      | ALQEATYQTPDFIVPLTDLR               | 2 | 0.999 |             |            |
|        |              |           |                                    |       |      | AQLSDPTLNLPLVK                     | 2 | 0.967 |             |            |
|        |              |           |                                    |       |      | AQSVYQELLAQEDR                     | 2 | 1.000 |             |            |
|        |              |           |                                    |       |      | IEGNLIFDPNNYLPK                    | 2 | 0.994 |             |            |
|        |              |           |                                    |       |      | INDEIQALEFPQK                      | 2 | 0.986 |             |            |
|        |              |           |                                    |       |      | IPSFQINFK                          | 2 | 0.998 |             |            |
|        |              |           |                                    |       |      | ITQLLSGEQNEQVK                     | 2 | 1.000 |             |            |
|        |              |           |                                    |       |      | IVVSTYLENLK                        | 2 | 0.999 |             |            |
|        |              |           |                                    |       |      | KGNVATEISIER                       | 2 | 1.000 |             |            |
|        |              |           |                                    |       |      | LSQQVSDYLSTFNWER                   | 2 | 1.000 |             |            |
|        |              |           |                                    |       |      | LVAASITWLETSR                      | 2 | 1.000 |             |            |
|        |              |           |                                    |       |      | MELPNFHIFDNFLK                     | 3 | 1.000 |             |            |
|        |              |           |                                    |       |      | MLTFEYMIPIK                        | 2 | 0.901 |             |            |
|        |              |           |                                    |       |      | NVDASVTITAR                        | 2 | 1.000 |             |            |
|        |              |           |                                    |       |      | QLEALSFNCFEENR                     | 2 | 1.000 |             |            |
|        |              |           |                                    |       |      | SLQDIFQIEISELKR                    | 3 | 0.828 |             |            |
|        |              |           |                                    |       |      | TLSSSLHIPPDIIDLGTVLK               | 3 | 0.987 |             |            |
|        |              |           |                                    |       |      | VLELDDEVOIK                        | 2 | 0.993 |             |            |
|        |              |           |                                    |       |      | VLVDFHGYTK                         | 2 | 0.956 |             |            |
|        |              |           |                                    |       |      | VVVGALLETQK                        | 2 | 0.999 |             |            |
|        |              |           |                                    |       |      | VYQMDVQQLQR                        | 2 | 1.000 |             |            |
|        |              |           |                                    |       |      | YGMMAQVQTQTK                       | 2 | 1.000 |             |            |
|        |              |           |                                    |       |      | YIVGATDFASQLSSQIEPIQK              | 2 | 0.998 |             |            |
| E1BNS8 | E1BNS8_BOVIN | BT.51782  | Uncharacterized protein            | 0.999 | 3.6  |                                    |   |       | 3,032,895   | 953,985    |
|        |              |           |                                    |       |      | LLNHPHIIKLYQVMTKDMLYIVTEFAK        | 3 | 0.999 |             |            |
| E1BNU0 | E1BNU0_BOVIN |           | Uncharacterized protein            | 0.999 | 11.0 |                                    |   |       | 2,690,383   | 301,459    |
|        |              |           |                                    |       |      | MTGQELQVQFKHLVGEVIGK               | 3 | 0.999 |             |            |
| E1BNV7 | E1BNV7_BOVIN | BT.1774   | Uncharacterized protein            | 0.999 | 3.3  |                                    |   |       | 7,992,477   | 849,122    |
|        |              |           |                                    |       |      | GSSSSGPEELGVLQEEEAAGGDED           | 3 | 0.999 |             |            |
|        |              |           |                                    |       |      | SNLKTMYSPNGK                       | 3 | 0.999 |             |            |
|        |              |           |                                    |       |      | TEMEMAAPKQOPVPPQAPSSLDGSAQAQAGSPR  | 3 | 0.999 |             |            |
| E1BNW3 | E1BNW3_BOVIN | HS6ST1    | Uncharacterized protein            | 0.999 | 8.3  |                                    |   |       | 1,323,067   | 122,594    |
|        |              |           |                                    |       |      | ASKFLLVVVGSACFMILLYQYAGPGLSLGAPGGR | 3 | 0.999 |             |            |
| E1BNW6 | E1BNW6_BOVIN | KCNK5     | Uncharacterized protein            | 0.999 | 5.6  |                                    |   |       | 2,086,917   | 670,142    |
|        |              |           |                                    |       |      | GPLLTSIAIFYLAIGAAIFVLEEPHWK        | 3 | 0.999 |             |            |
| E1BNX2 | E1BNX2_BOVIN | GPR149    | Uncharacterized protein            | 0.999 | 4.7  |                                    |   |       | 1,376,039   | 293,569    |
|        |              |           |                                    |       |      | VLSLSPDEAPGAPRYSGGCSPPSDTVFGGPPAR  | 3 | 0.999 |             |            |
| E1BNX9 | E1BNX9_BOVIN | TRPM4     | Uncharacterized protein            | 0.999 | 1.3  |                                    |   |       | 375,383     | 54,576     |
|        |              |           |                                    |       |      | GDPEVLQAQVERIMTR                   | 3 | 0.999 |             |            |
| E1BNY7 | E1BNY7_BOVIN | FAM196B   | Uncharacterized protein            | 0.999 | 3.2  |                                    |   |       | 1,125,248   | 124,025    |
|        |              |           |                                    |       |      | VQSNPVSVCFEAGTWR                   | 3 | 0.999 |             |            |
| E1BNY8 | E1BNY8_BOVIN | GTF3C1    | Uncharacterized protein            | 0.999 | 2.2  |                                    |   |       | 5,231,890   | 430,762    |
|        |              |           |                                    |       |      | DFGFGWALVSDLLLCLPSIFTVQVQVSYK      | 3 | 0.999 |             |            |
|        |              |           |                                    |       |      | YDILMEKLSLTSAR                     | 3 | 0.999 |             |            |
| E1BNY9 | E1BNY9_BOVIN | HUWE1     | Uncharacterized protein            | 0.999 | 0.5  |                                    |   |       | 7,785,134   | 1,089,110  |
|        |              |           |                                    |       |      | LLGPSAAAADILQSSSLPLQSR             | 3 | 0.999 |             |            |
| E1BNZ0 | E1BNZ0_BOVIN | KNDC1     | Uncharacterized protein            | 0.999 | 2.1  |                                    |   |       | 4,736,836   | 344,433    |
| G3N205 | G3N205_BOVIN | KNDC1     | Uncharacterized protein            | 0.999 | 2.1  |                                    |   |       | 4,736,836   | 344,433    |
|        |              |           |                                    |       |      | PPADQDRGFLDK                       | 3 | 0.999 |             |            |
|        |              |           |                                    |       |      | SADDGTDWAAEIVTSTSK                 | 3 | 0.999 |             |            |
| E1BP12 | E1BP12_BOVIN | VASH2     | Uncharacterized protein            | 0.999 | 5.1  |                                    |   |       | 7,845,088   | 403,885    |
|        |              |           |                                    |       |      | TLQYNTGTOFFERKMR                   | 3 | 0.999 |             |            |
| E1BP25 | E1BP25_BOVIN | SLC14A2   | Uncharacterized protein            | 0.999 | 2.9  |                                    |   |       | 6,675,100   | 961,634    |
|        |              |           |                                    |       |      | PTVELLALLETMEDSSEIKVETGISK         | 3 | 0.999 |             |            |
| E1BP50 | E1BP50_BOVIN | BT.65015  | Uncharacterized protein            | 0.916 | 1.7  |                                    |   |       | 275,633     | 33,340     |
|        |              |           |                                    |       |      | DDAGTSLKESWQEPAGSPADCPPEPSK        | 3 | 0.802 |             |            |
| E1BP51 | E1BP51_BOVIN | TSTO2     | Uncharacterized protein            | 0.999 | 4.8  |                                    |   |       | 188,116     | 28,852     |
|        |              |           |                                    |       |      | QLVLTCPACQERGFACCVTCQDK            | 3 | 0.999 |             |            |
| E1BP53 | E1BP53_BOVIN | PIP5K1C   | Uncharacterized protein (Fragment) | 0.999 | 8.1  |                                    |   |       | 2,744,512   | 200,644    |



|        |              |             |                                    |       |                                    |   |       |            |            |
|--------|--------------|-------------|------------------------------------|-------|------------------------------------|---|-------|------------|------------|
|        |              |             |                                    |       | SIPYKDLDFIQDMPGELMLDADTFVSALVK     | 3 | 0.826 |            |            |
| E1BP55 | E1BP55_BOVIN | NAV3        | Uncharacterized protein            | 0.920 | VSPSVPLMTGQPGHGKGLGHR              | 3 | 0.999 | 1,326,394  | 249,095    |
| E1BP63 | E1BP63_BOVIN | RNF139      | Uncharacterized protein (Fragment) | 0.999 | KPSGVGSSAMITSSGATITSGSATLGK        | 3 | 0.817 | 19,976,087 | 5,447,379  |
| E1BP64 | E1BP64_BOVIN | Bt.63656    | Uncharacterized protein            | 0.999 | STGNIIEFIFGVVFMFGNGAYTMMFESGSK     | 3 | 0.999 | 1,321,206  | 94,000     |
| E1BP74 | E1BP74_BOVIN | Bt.59143    | Uncharacterized protein            | 0.999 | QAEQYLLEFQQQSEGLRQEAERK            | 3 | 0.999 | 5,659,159  | 950,510    |
| E1BP75 | E1BP75_BOVIN | Bt.106452   | Uncharacterized protein            | 0.999 | EQGNGRLVCLLPSSQAR                  | 3 | 0.802 |            |            |
| G3N139 | G3N139_BOVIN | ZNF512B     | Uncharacterized protein            | 0.999 | LIELLEAVPHVLQILGMGSKRLTLTHR        | 3 | 0.999 | 849,431    | 91,306     |
| E1BP84 | E1BP84_BOVIN | ZNF512B     | Uncharacterized protein (Fragment) | 0.999 | TLQYEHQVTGYRDEK                    | 3 | 0.999 | 849,431    | 91,306     |
| E1BP91 | E1BP91_BOVIN | NPEPPS      | Uncharacterized protein            | 0.999 | PVTVSRPVGVSKPIGVSK                 | 3 | 0.999 | 3,260,830  | 456,385    |
| E1BP93 | E1BP93_BOVIN | Bt.105674   | Uncharacterized protein            | 0.999 | LLFLGPPFPPLLLLLSRSSR               | 3 | 0.999 |            |            |
| E1BP97 | E1BP97_BOVIN | PDILT       | Uncharacterized protein            | 0.999 | QILSADLRSPVYTLVXKGDGTLDMILK        | 3 | 0.999 | 873,173    | 118,564    |
| E1BPA5 | E1BPA5_BOVIN | ZDHHC24     | Uncharacterized protein            | 0.999 | ILLQCFCQDVTLSLYR                   | 3 | 0.999 | 2,174,442  | 433,497    |
| E1BPA6 | E1BPA6_BOVIN | DUSP8       | Uncharacterized protein            | 0.999 | SQPISCEGVVESTALVWLRROISQK          | 3 | 0.999 | 2,259,571  | 631,733    |
| G3N1Q8 | G3N1Q8_BOVIN | DUSP8       | Uncharacterized protein            | 0.999 | NYRPFLCLLLHGAVLLHASVLLGPALSALLR    | 3 | 0.999 | 1,336,144  | 64,839     |
| E1BPB1 | E1BPB1_BOVIN | KIF24       | Uncharacterized protein            | 0.999 | SFSLDIKSIAYTPSRR                   | 3 | 0.999 | 1,336,144  | 64,839     |
| E1BPB2 | E1BPB2_BOVIN | Bt.62402    | Uncharacterized protein            | 0.999 | PGGSLPALSPPIRQR                    | 3 | 0.999 | 4,256,860  | 710,232    |
| E1BPC1 | E1BPC1_BOVIN | CEP72       | Uncharacterized protein            | 0.999 | VSRSSLKPCAQAATLAAYPAETPTSGEEYPSR   | 3 | 0.999 | 4,639,819  | 1,195,127  |
| G3N3P2 | G3N3P2_BOVIN | CEP72       | Uncharacterized protein (Fragment) | 0.999 | SLSLRSNLSVLEGICTALESNLNYNR         | 3 | 0.999 | 909,500    | 270,608    |
| E1BPC2 | E1BPC2_BOVIN | PDZD8       | Uncharacterized protein            | 0.947 | LEEVALGLATSNMEYLSKFRLEAPSPK        | 3 | 0.841 | 1,702,861  | 300,298    |
| E1BPC3 | E1BPC3_BOVIN | ATP8B1      | Uncharacterized protein            | 0.999 | DVSTRRSAYAFSHQR                    | 3 | 0.999 | 2,204,725  | 183,729    |
| E1BPD7 | E1BPD7_BOVIN | MKI67       | Uncharacterized protein            | 0.999 | PQQTGETTHSPREPEDGDRGTAVSQEAPEEK    | 3 | 0.999 | 4,617,450  | 605,086    |
| E1BPD8 | E1BPD8_BOVIN | PDE11A      | Uncharacterized protein            | 0.999 | PTHTPGVTHTSPKEPEGGDGAAVSR          | 3 | 0.999 | 1,327,653  | 155,494    |
| E1BPE2 | E1BPE2_BOVIN | SYTL4       | Uncharacterized protein            | 0.999 | LQLEWDSICMPLYQALVK                 | 3 | 0.999 | 1,553,349  | 233,726    |
| E1BPJ7 | E1BPJ7_BOVIN | NOX1        | Uncharacterized protein            | 0.999 | ETVEQSLHQSLQGDWIPGRKIIEQQK         | 3 | 0.999 | 3,379,291  | 1,064,909  |
| E1BPK7 | E1BPK7_BOVIN | ZFYVE1      | Uncharacterized protein            | 0.999 | HPFTLSAPEEDFSIHRAVDWTEENLIR        | 3 | 0.999 | 1,022,687  | 190,789    |
| G3N025 | G3N025_BOVIN | ZFYVE1      | Uncharacterized protein            | 0.999 | VVSIFGNTGDGKSHLNLHFFYGR            | 3 | 0.999 | 1,022,687  | 190,789    |
| E1BPK8 | E1BPK8_BOVIN | LRRC4B      | Uncharacterized protein            | 0.999 | PGEGAGQASSTTAPAPR                  | 3 | 0.999 | 3,575,517  | 705,267    |
| E1BPK9 | E1BPK9_BOVIN | BL7537      | Uncharacterized protein (Fragment) | 0.999 | DPELGVGALPHHDGHDGAPVPKVSGLERSQEK   | 3 | 0.999 | 528,154    | 110,285    |
| Q32PF2 | ACLY_BOVIN   | ACLY        | ATP-citrate synthase               | 0.999 | DGVVYLDLAAKVDATADYICKVK            | 3 | 0.999 | 1,854,669  | 265,977    |
| E1BPL9 | E1BPL9_BOVIN | BL101966    | Uncharacterized protein            | 0.999 | VVSTFGVIFDPAKQDFDWNQFR             | 3 | 0.999 | 1,854,669  | 265,977    |
| E1BPM4 | E1BPM4_BOVIN | Bt.62011    | Uncharacterized protein            | 0.999 | QQLTFLGPPLVKAAATGEEVSAEDLGGADLHCRK | 3 | 0.999 | 2,177,537  | 265,247    |
| E1BPN1 | E1BPN1_BOVIN | WWTR1       | Uncharacterized protein            | 0.999 | NVTWNILNEQTKVLTQLITGPKAVEAYGK      | 3 | 0.999 | 4,615,091  | 247,075    |
| E1BPN4 | E1BPN4_BOVIN | CHST3       | Uncharacterized protein            | 0.999 | QLPMEAETLATVQAANPPAMTPDMR          | 3 | 0.999 | 3,816,421  | 387,476    |
| G3N1Q0 | G3N1Q0_BOVIN | MCCC2       | Uncharacterized protein            | 0.999 | MEKGLSLPODCRHFHLSLR                | 3 | 0.999 |            |            |
| E1BPP6 | E1BPP6_BOVIN | MCCC2       | Uncharacterized protein (Fragment) | 0.999 | RCGPLNMTLAAEAER                    | 3 | 0.999 | 3,745,252  | 393,856    |
| E1BPR7 | E1BPR7_BOVIN | SGCD        | Uncharacterized protein            | 0.999 | QGTIFLGGPPLVKAATGEEVSAEDLGGADLHCRK | 3 | 0.999 | 3,745,252  | 393,856    |
| E1BPS1 | E1BPS1_BOVIN | BRPF1       | Uncharacterized protein            | 0.999 | NVTWNILNEQTKVLTQLITGPKAVEAYGK      | 3 | 0.999 | 4,468,659  | 339,221    |
| E1BPS3 | E1BPS3_BOVIN | BL105149    | Uncharacterized protein            | 0.999 | NRESQMTSPHSGSPVPPQLPIMGSLRQR       | 3 | 0.999 | 20,818,208 | 1,255,335  |
| F1N6Q9 | F1N6Q9_BOVIN | BL105149    | Uncharacterized protein            | 0.999 | PMDFFTMKQNLAYR                     | 3 | 0.999 |            |            |
| E1BPS4 | E1BPS4_BOVIN | LOC522232   | Uncharacterized protein (Fragment) | 1.000 | PDTGTEEEFGLVSNLILLRNR              | 3 | 0.999 | 7,735,998  | 1,141,101  |
| E1BPS5 | E1BPS5_BOVIN | NPC1L1      | Uncharacterized protein            | 0.999 | VLIIDNCLTPASKQTPIDLILLEASPER       | 3 | 0.999 | 7,735,998  | 1,141,101  |
| E1BPS6 | E1BPS6_BOVIN | 100337013   | Uncharacterized protein            | 0.999 | GLGEVDCKEIGDCVPGGSAASPDCLPALDYLR   | 3 | 0.999 | 1,637,376  | 233,028    |
| E1BPU1 | E1BPU1_BOVIN | EPB41L5     | Uncharacterized protein            | 1.000 | SDVSDIGSDNCSLADTEEQTPRDCLGHR       | 3 | 0.999 |            |            |
| E1BPV0 | E1BPV0_BOVIN | ARMC3       | Uncharacterized protein            | 0.999 | TFALTSGFAVLDFLLQMSAFVLLSLSRR       | 3 | 0.999 | 704,190    | 92,188     |
| F1MJY4 | F1MJY4_BOVIN | ARMC3       | Uncharacterized protein            | 0.999 | FYLLLLGVDPGSPGSAANGSADSOGLFFFR     | 3 | 0.999 | 1,638,712  | 221,549    |
| E1BPV7 | E1BPV7_BOVIN | COL28A1     | Uncharacterized protein            | 1.000 | CLNNAIDSPALNTR                     | 3 | 0.999 | 2,999,429  | 723,749    |
| E1BPX1 | E1BPX1_BOVIN | Bt.65468    | Uncharacterized protein            | 1.000 | CLNNAIDSPALNTR                     | 3 | 0.999 | 1,070,101  | 231,802    |
| E1BPX4 | E1BPX4_BOVIN | MCM8        | Uncharacterized protein            | 0.999 | RNATMIFIGLASNNDVKK                 | 3 | 0.999 | 1,070,101  | 231,802    |
| E1BPX8 | E1BPX8_BOVIN | Bt.2916     | Uncharacterized protein (Fragment) | 0.999 | GDVVRGPPGPPGPR                     | 3 | 0.999 | 904,012    | 149,835    |
| E1BPX9 | E1BPX9_BOVIN | LRPPRC      | Uncharacterized protein            | 0.999 | KLKWSYAENVGEHLLK                   | 3 | 0.999 | 45,456,633 | 13,670,487 |
| E1BPY3 | E1BPY3_BOVIN | SEPSECS     | Uncharacterized protein            | 0.999 | TIECELVDHLDVSCVPGDVTITGVVK         | 3 | 0.999 | 1,565,847  | 183,297    |
| E1BPY8 | E1BPY8_BOVIN | Bt.38709    | Uncharacterized protein            | 0.999 | LLEEKESLISQLSRGK                   | 3 | 0.999 | 3,383,167  | 481,126    |
| E1BQ00 | E1BQ00_BOVIN | DMTF1       | Uncharacterized protein            | 0.999 | LGTVYDVSHYNALLKVYLQNEHK            | 3 | 0.999 | 1,883,753  | 252,596    |
| E1BQ03 | E1BQ03_BOVIN | NACC1       | Uncharacterized protein            | 0.999 | AVTQLGSMFLTR                       | 3 | 0.999 | 1,209,679  | 143,574    |
| E1BQ05 | E1BQ05_BOVIN | XKR7        | Uncharacterized protein            | 0.999 | NRNMSTPSAFEGGQSGLAFLK              | 3 | 0.999 | 5,584,583  | 680,657    |
| E1BQ16 | E1BQ16_BOVIN | MGEA5       | Uncharacterized protein            | 0.999 | GLKOLHENQKNPTLLENK                 | 3 | 0.999 | 2,979,996  | 768,236    |
| F1MEE4 | F1MEE4_BOVIN | BL45031     | Uncharacterized protein            | 0.999 | LQGLYCDVSVVKGHAFKAHR               | 3 | 0.999 | 5,230,917  | 804,848    |
| P79393 | P12R_BOVIN   | PTGIR       | Prostacyclin receptor              | 0.999 | GEAAEVAGGPGVTGAGGGPPTYELR          | 3 | 0.999 | 2,507,521  | 247,763    |
| E1BQ27 | E1BQ27_BOVIN | PTGIR       | Uncharacterized protein            | 0.999 | RLQKWEINTLYAPK                     | 3 | 0.999 | 1,808,183  | 419,541    |
| E1BQ34 | E1BQ34_BOVIN | HIPK1       | Uncharacterized protein            | 0.999 | CLALSHPLYLAQLDGPRR                 | 3 | 0.999 | 1,200,383  | 76,352     |
| E1BQ40 | E1BQ40_BOVIN | C23H6ORF142 | Uncharacterized protein            | 0.999 | IEPSGVDVSGQSSNDKYTHSK              | 3 | 0.999 | 1,200,383  | 76,352     |
| E9QB09 | E9QB09_BOVIN |             | Uncharacterized protein (Fragment) | 0.974 | PPAFSFSVPTNQKTPAPFGDLASAVLEEFHSR   | 3 | 0.999 | 1,200,383  | 76,352     |
| G3MZA6 | G3MZA6_BOVIN | SLFN14      | Uncharacterized protein            | 0.999 | HEODAGVRCSGARTLPLATGK              | 3 | 0.837 | 4,323,429  | 338,018    |
| F1MAU2 | F1MAU2_BOVIN | SLFN14      | Uncharacterized protein (Fragment) | 0.999 | HYCDHSEDAGVICSGRFVRLAGDGPCCSGR     | 3 | 0.844 | 7,611,092  | 594,945    |
|        |              |             |                                    |       | SWCPDFISLR                         | 3 | 0.999 | 11,738,552 | 770,809    |

|        |              |            |                                                              |       |                                  |   |       |            |           |
|--------|--------------|------------|--------------------------------------------------------------|-------|----------------------------------|---|-------|------------|-----------|
| F1MAV4 | F1MAV4_BOVIN | BL106375   | Uncharacterized protein                                      | 0.941 | 1.3                              |   |       | 2,492,846  | 274,874   |
| F1MAZ4 | F1MAZ4_BOVIN | CHRDL1     | Uncharacterized protein (Fragment)                           | 0.999 | HNRISPPVSK                       | 3 | 0.818 | 1,527,832  | 139,746   |
| F1MB06 | F1MB06_BOVIN | Bt.26214   | Uncharacterized protein (Fragment)                           | 0.999 | HSYHRSHYDPPPSRQAGGLPR            | 3 | 0.999 | 6,576,032  | 1,713,166 |
| F1MB18 | F1MB18_BOVIN |            | Uncharacterized protein (Fragment)                           | 0.999 | PRTPNSSCAAPSKTSCGLFPQGGPPQR      | 3 | 0.999 |            |           |
| F1N0K3 | F1N0K3_BOVIN | Bt.87875   | Uncharacterized protein                                      | 0.999 | 25.5                             |   |       | 796,046    | 192,892   |
| F1MPZ7 | F1MPZ7_BOVIN | GNLY       | Uncharacterized protein                                      | 0.999 | 16.4                             |   |       | 796,046    | 192,892   |
| F1MB39 | F1MB39_BOVIN | Bt.103805  | Uncharacterized protein (Fragment)                           | 0.999 | IIQHLMDKLDGDPDENTVIEAASK         | 3 | 0.999 |            |           |
| F1MB40 | F1MB40_BOVIN | LOC788599  | Uncharacterized protein                                      | 0.999 | SSLPEISWVFFSQQFCLLLGSALGGVFKR    | 3 | 0.999 | 2,896,384  | 847,827   |
| F1MB43 | F1MB43_BOVIN | Bt.26222   | Uncharacterized protein (Fragment)                           | 0.999 | CNECGKTFNRGSHLSTHEVIHTGMK        | 3 | 0.999 | 2,478,887  | 370,601   |
| Q2YD6  | CA049_BOVIN  |            | Uncharacterized protein C1orf49 homolog                      | 0.999 | TVELALACLFLTFLAFGQTLQFHEHVFRLR   | 3 | 0.999 | 1,990,096  | 208,424   |
| F1MB56 | F1MB56_BOVIN | C16H1ORF49 | Uncharacterized protein                                      | 0.999 | 8.5                              |   |       | 1,990,096  | 208,424   |
| F1MB97 | F1MB97_BOVIN | BL5804     | Uncharacterized protein (Fragment)                           | 0.999 | LPYHAWAFSPPLASGPAF               | 3 | 0.999 | 5,662,169  | 3,667,745 |
| F1MBD2 | F1MBD2_BOVIN | MBLAC1     | Uncharacterized protein                                      | 0.999 | 5.0                              |   |       |            |           |
| F1MBD5 | F1MBD5_BOVIN | SURF2      | Uncharacterized protein (Fragment)                           | 0.999 | QQEDEKALTASKG                    | 3 | 0.999 |            |           |
| F1MBE1 | F1MBE1_BOVIN | Bt.87966   | Uncharacterized protein                                      | 0.999 | TLFIGNLEKTTTYHDLR                | 3 | 0.999 | 1,511,980  | 279,794   |
| F1MBE2 | F1MBE2_BOVIN | LOC505265  | Uncharacterized protein                                      | 0.999 | 11.8                             |   |       |            |           |
| F1MBE9 | F1MBE9_BOVIN | Bt.12630   | Uncharacterized protein (Fragment)                           | 0.999 | VLGTADVVPVPGHGAPFRVIREASAPETEPAR | 3 | 0.999 | 7,298,192  | 585,527   |
| F1MBH6 | F1MBH6_BOVIN | SLC16A6    | Uncharacterized protein                                      | 0.999 | 4.2                              |   |       | 3,367,804  | 624,821   |
| F1MBI2 | F1MBI2_BOVIN | HR         | Uncharacterized protein                                      | 0.999 | EDQQDGDGPPR                      | 3 | 0.999 | 2,024,925  | 287,955   |
| F1MBI8 | F1MBI8_BOVIN | Bt.65817   | Uncharacterized protein                                      | 0.999 | 2.3                              |   |       | 12,357,846 | 2,462,543 |
| F1MBJ0 | F1MBJ0_BOVIN | Bt.25476   | Uncharacterized protein                                      | 0.999 | NIILMGPPGAGKTTVGR                | 3 | 0.999 | 3,460,171  | 663,406   |
| F1MBK9 | F1MBK9_BOVIN | Bt.101019  | Uncharacterized protein                                      | 0.999 | 5.5                              |   |       | 1,475,001  | 407,826   |
| F1MBL6 | F1MBL6_BOVIN | SMG1       | Uncharacterized protein (Fragment)                           | 1.000 | HDSVYKAFESSFSGPEILTLSLSVSPHR     | 3 | 0.999 | 5,760,104  | 584,346   |
| F1MBL9 | F1MBL9_BOVIN | SPDYA      | Uncharacterized protein                                      | 1.000 | NMGLSPPGSSSSTSTCRVPSR            | 3 | 0.999 | 5,950,567  | 380,783   |
| F1MBQ1 | F1MBQ1_BOVIN | PPEF1      | Serine/threonine-protein phosphatase (Fragment)              | 0.999 | 5.0                              |   |       | 4,516,633  | 481,035   |
| P19754 | ADCY1_BOVIN  | ADCY1      | Adenylate cyclase type 1                                     | 0.999 | SVVTAVASTGECFAMFAFAPAITALK       | 3 | 0.999 | 1,061,192  | 186,491   |
| F1MBR9 | F1MBR9_BOVIN | BL517      | Uncharacterized protein (Fragment)                           | 0.999 | 2.1                              |   |       | 1,061,192  | 186,491   |
| F1MBS6 | F1MBS6_BOVIN | Bt.87743   | Uncharacterized protein                                      | 0.999 | DGETGVGRHFNLCPLLGHPTVPR          | 3 | 0.999 | 26,045,625 | 2,700,888 |
| F1MBU2 | F1MBU2_BOVIN | BL7562     | Uncharacterized protein                                      | 0.999 | 1.9                              |   |       | 1,161,853  | 192,293   |
| Q6H236 | PEG3_BOVIN   | PEG3       | Paternally-expressed gene 3 protein                          | 0.999 | GPSAEMQGYMMRDNLSSIDLQSFMAR       | 3 | 0.999 | 1,792,829  | 139,515   |
| F1MBU3 | F1MBU3_BOVIN | PEG3       | Uncharacterized protein                                      | 0.999 | 5.5                              |   |       | 1,792,829  | 139,515   |
| F1MBU6 | F1MBU6_BOVIN | BL45359    | Uncharacterized protein                                      | 0.999 | RLNSEPWGLVAPPQVPPAEGRPGFER       | 3 | 0.999 | 2,623,717  | 308,941   |
| F1MBV4 | F1MBV4_BOVIN | Bt.22977   | Uncharacterized protein                                      | 0.999 | 8.6                              |   |       | 1,268,347  | 256,988   |
| F1MD27 | F1MD27_BOVIN | Bt.22977   | Uncharacterized protein                                      | 0.999 | QCWNITSGVTSTVIVVWLAILASVPGLYFSK  | 3 | 0.999 | 1,268,347  | 256,988   |
| F1MD29 | F1MD29_BOVIN | Bt.22977   | Uncharacterized protein                                      | 0.999 | 0.6                              |   |       | 1,268,347  | 256,988   |
| Q9GL30 | PLBL1_BOVIN  | PLBL1      | Phospholipase B-like 1                                       | 0.999 | OLDNILAAVHDLVNESKINSSK           | 3 | 0.999 | 1,668,956  | 143,883   |
| F1MBV7 | F1MBV7_BOVIN | PLBL1      | Uncharacterized protein                                      | 0.999 | 4.0                              |   |       | 1,668,956  | 143,883   |
| F1N138 | F1N138_BOVIN | BL102954   | Uncharacterized protein                                      | 0.999 | PIFKDSWPASEK                     | 3 | 0.999 | 462,233    | 62,053    |
| F1MBV8 | F1MBV8_BOVIN | BL102954   | Uncharacterized protein (Fragment)                           | 0.999 | SGKLSMGQWAFSMENVLGLNLPWR         | 3 | 0.999 | 462,233    | 62,053    |
| F1MBX0 | F1MBX0_BOVIN | Bt.53547   | Uncharacterized protein (Fragment)                           | 0.999 | 1.8                              |   |       | 1,886,434  | 370,645   |
| Q3T028 | TSG13_BOVIN  | TSGA13     | Testis-specific gene 13 protein                              | 0.999 | LRDYLWAAQAEERDDMEK               | 3 | 0.999 | 1,886,434  | 370,645   |
| F1MC03 | F1MC03_BOVIN | Bt.59025   | Uncharacterized protein                                      | 0.999 | 2.7                              |   |       | 2,861,497  | 617,702   |
| F1MK79 | F1MK79_BOVIN | Bt.59025   | Uncharacterized protein                                      | 0.999 | DPSQCQPHFPDMSDAVVK               | 3 | 0.999 | 2,861,497  | 617,702   |
| F1N4A0 | F1N4A0_BOVIN | Bt.59025   | Uncharacterized protein                                      | 0.999 | 1.4                              |   |       | 2,861,497  | 617,702   |
| F1MC07 | F1MC07_BOVIN |            | Uncharacterized protein (Fragment)                           | 0.999 | RFAGQMAALCSR                     | 3 | 0.999 |            |           |
| G3MY17 | G3MY17_BOVIN |            | Uncharacterized protein (Fragment)                           | 0.999 | 1.2                              |   |       | 1,701,433  | 496,767   |
| F1MC09 | F1MC09_BOVIN |            | Uncharacterized protein (Fragment)                           | 0.999 | 1.2                              |   |       | 1,701,433  | 496,767   |
| F1MC11 | F1MC11_BOVIN | BL91072    | Uncharacterized protein                                      | 1.000 | EAGASERGPPEGAFGGGGFSCGSDLVSKK    | 3 | 0.999 | 7,957,658  | 1,341,702 |
| F1MC20 | F1MC20_BOVIN | LOC790600  | Uncharacterized protein                                      | 0.999 | 0.8                              |   |       | 2,529,442  | 133,113   |
| F1MC19 | F1MC19_BOVIN | LOC790600  | Uncharacterized protein (Fragment)                           | 0.999 | NHLTNSDQNTASFLHK                 | 3 | 0.999 | 2,058,057  | 194,650   |
| F1MC26 | F1MC26_BOVIN | TBC1D2B    | Uncharacterized protein (Fragment)                           | 0.999 | 3.6                              |   |       | 2,058,057  | 194,650   |
| F1MC30 | F1MC30_BOVIN | GCNT4      | Uncharacterized protein                                      | 0.999 | 3.7                              |   |       | 7,983,333  | 435,377   |
| F1MC39 | F1MC39_BOVIN | Bt.1097    | Uncharacterized protein                                      | 0.999 | 3.3                              |   |       | 14,454,329 | 1,588,458 |
| F1MC40 | F1MC40_BOVIN | Bt.44639   | Uncharacterized protein                                      | 0.999 | NIEEWGPFDLVIGGSPCNDLSNVNPK       | 3 | 0.999 | 5,371,829  | 1,056,652 |
| F1MC45 | F1MC45_BOVIN | Bt.68981   | Uncharacterized protein (Fragment)                           | 0.956 | 1.8                              |   |       | 3,607,784  | 518,179   |
| F1MC48 | F1MC48_BOVIN | Bt.97636   | Uncharacterized protein                                      | 0.999 | 3.5                              |   |       | 810,275    | 136,944   |
| F1MC50 | F1MC50_BOVIN | ITSN2      | Uncharacterized protein (Fragment)                           | 0.999 | KLGLDYSYDLASRAK                  | 3 | 0.999 | 6,350,884  | 601,183   |
| F1MC61 | F1MC61_BOVIN | MAP3K11    | Uncharacterized protein                                      | 0.999 | LHPAHIAPLESTAASKEKDK             | 3 | 0.999 |            |           |
| F1MC84 | F1MC84_BOVIN | LOC535409  | Uncharacterized protein (Fragment)                           | 0.999 | 5.5                              |   |       |            |           |
| F1MC90 | F1MC90_BOVIN | ZFP106     | Uncharacterized protein                                      | 0.999 | 5.5                              |   |       |            |           |
| F1MCA6 | F1MCA6_BOVIN | CCDC150    | Uncharacterized protein (Fragment)                           | 0.999 | FSTDNDFKSEGGYK                   | 3 | 0.999 | 3,257,592  | 661,014   |
| F1MCA8 | F1MCA8_BOVIN | TMPO       | Uncharacterized protein                                      | 0.999 | 2.3                              |   |       | 4,477,250  | 470,038   |
| F1MCC3 | F1MCC3_BOVIN | Bt.28829   | Uncharacterized protein (Fragment)                           | 0.999 | 2.4                              |   |       | 6,662,508  | 1,304,665 |
| Q0P5A8 | Q0P5A8_BOVIN | PNCK       | Pregnancy up-regulated non-ubiquitously expressed CaM kinase | 0.999 | 2.2                              |   |       | 9,196,545  | 911,398   |
| F1MCD1 | F1MCD1_BOVIN | ANKRD56    | Uncharacterized protein                                      | 0.999 | 2.2                              |   |       | 7,862,335  | 702,529   |
|        |              |            |                                                              |       | 1.6                              |   |       | 1,636,604  | 229,885   |
|        |              |            |                                                              |       | 8.2                              |   |       | 349,253    | 39,483    |
|        |              |            |                                                              |       | 8.5                              |   |       | 349,253    | 39,483    |
|        |              |            |                                                              |       | 3.1                              |   |       | 2,803,383  | 237,534   |

|          |              |             |                                                                         |       |     |  |   |            |            |
|----------|--------------|-------------|-------------------------------------------------------------------------|-------|-----|--|---|------------|------------|
| F1MCD3   | F1MCD3_BOVIN | BL48084     | Uncharacterized protein (Fragment                                       | 0.999 | 2.7 |  |   | 360,700    | 66,624     |
| Q0V896   | Q0V896_BOVIN | CYP4F2      | Cytochrome P450, family 4, subfamily F, polypeptide 2                   | 0.999 | 2.7 |  |   | 360,700    | 66,624     |
| F1MCE7   | F1MCE7_BOVIN | BMPR-1A     | Uncharacterized protein                                                 | 0.999 | 5.3 |  | 3 | 777,574    | 134,260    |
| F1MCF8   | F1MCF8_BOVIN | BL106009    | Uncharacterized protein                                                 | 1.000 | 7.7 |  |   | 1,934,835  | 89,877     |
| F1MLW7   | F1MLW7_BOVIN | BL106009    | Uncharacterized protein                                                 | 1.000 | 7.7 |  |   | 1,934,835  | 89,877     |
| F1MLW8   | F1MLW8_BOVIN | LOC616727   | Uncharacterized protein                                                 | 1.000 | 7.7 |  |   | 1,934,835  | 89,877     |
| F1MCG5   | F1MCG5_BOVIN | BL91437     | Uncharacterized protein                                                 | 0.999 | 4.2 |  | 2 | 2,965,871  | 287,240    |
| F1NZT8   | F1NZT8_BOVIN | TAP2        | Uncharacterized protein                                                 | 0.999 | 4.5 |  | 3 | 2,965,871  | 287,240    |
| F1MCH3   | F1MCH3_BOVIN | BL24813     | Uncharacterized protein                                                 | 0.999 | 6.4 |  | 3 | 6,407,458  | 558,289    |
| F1MCJ5   | F1MCJ5_BOVIN | LOC619083   | Uncharacterized protein (Fragment                                       | 0.999 | 8.5 |  | 3 | 1,057,716  | 170,020    |
| F1MR68   | F1MR68_BOVIN | LOC785899   | Uncharacterized protein                                                 | 0.999 | 9.0 |  | 3 | 1,057,716  | 170,020    |
| F1MCK2   | F1MCK2_BOVIN | AHNAK       | Uncharacterized protein                                                 | 0.999 | 0.5 |  | 3 | 403,773    | 75,060     |
| F1MCL3   | F1MCL3_BOVIN | BL61353     | Uncharacterized protein                                                 | 1.000 | 2.8 |  | 3 | 10,727,463 | 546,235    |
| F1MCL8   | F1MCL8_BOVIN | ARHGAP31    | Uncharacterized protein (Fragment                                       | 1.000 | 3.8 |  | 3 | 4,341,247  | 553,072    |
| F1MCM3   | F1MCM3_BOVIN | UHRF1BP1    | Uncharacterized protein (Fragment                                       | 0.999 | 2.2 |  | 3 | 5,202,033  | 422,266    |
| Q58CQ0   | CL043_BOVIN  |             | Uncharacterized protein C12orf43 homolog                                | 0.999 | 7.0 |  | 3 | 860,268    | 118,904    |
| F1MCQ8   | F1MCQ8_BOVIN | C17H12ORF43 | Uncharacterized protein                                                 | 0.999 | 7.0 |  | 3 | 860,268    | 118,904    |
| P10895   | PLCD1_BOVIN  | PLCD1       | 1-phosphatidylinositol-4,5-bisphosphate phosphodiesterase delta         | 0.999 | 3.2 |  | 3 | 1,077,565  | 213,410    |
| F1MCV9   | F1MCV9_BOVIN | PLCD1       | Uncharacterized protein (Fragment                                       | 0.999 | 3.1 |  | 3 | 1,077,565  | 213,410    |
| F1MCW5   | F1MCW5_BOVIN | RCBT2       | Uncharacterized protein                                                 | 0.999 | 5.7 |  | 3 | 1,708,042  | 591,791    |
| F1MW99   | F1MW99_BOVIN | BL25391     | Uncharacterized protein                                                 | 0.999 | 7.6 |  | 3 | 699,081    | 83,204     |
| F1MCW6   | F1MCW6_BOVIN | BL25391     | Uncharacterized protein (Fragment                                       | 0.999 | 8.1 |  | 3 | 699,081    | 83,204     |
| F1MCY0   | F1MCY0_BOVIN | PDE1C       | Uncharacterized protein (Fragment                                       | 0.999 | 3.9 |  | 3 | 1,643,838  | 168,134    |
| F1MCY1   | F1MCY1_BOVIN | BL21967     | Uncharacterized protein (Fragment                                       | 1.000 | 1.3 |  | 3 | 13,864,404 | 1,605,869  |
| F1MCY7   | F1MCY7_BOVIN | BL42317     | Uncharacterized protein                                                 | 0.999 | 1.0 |  | 3 | 2,253,727  | 516,886    |
| Q2HJA8-2 | TMUB2_BOVIN  | TMUB2       | isoform 2 of Transmembrane and ubiquitin-like domain-containing protein | 0.999 | 5.3 |  | 3 | 339,187    | 39,610     |
| Q2HJA8   | TMUB2_BOVIN  | TMUB2       | Transmembrane and ubiquitin-like domain-containing protein              | 0.999 | 5.0 |  | 3 | 339,187    | 39,610     |
| F1MCZ8   | F1MCZ8_BOVIN | TMUB2       | Uncharacterized protein                                                 | 0.999 | 5.3 |  | 3 | 339,187    | 39,610     |
| F1N5S5   | F1N5S5_BOVIN | TMUB2       | Uncharacterized protein                                                 | 0.999 | 5.0 |  | 3 | 339,187    | 39,610     |
| F1MD13   | F1MD13_BOVIN | BL10338     | Uncharacterized protein                                                 | 0.999 | 4.9 |  | 3 | 26,208,458 | 2,948,240  |
| F1MD22   | F1MD22_BOVIN | BL12699     | Uncharacterized protein                                                 | 0.952 | 1.9 |  | 3 | 1,120,037  | 256,649    |
| F1MD25   | F1MD25_BOVIN | BL62085     | Uncharacterized protein                                                 | 0.999 | 1.6 |  | 3 | 5,380,098  | 708,125    |
| F1MD34   | F1MD34_BOVIN | BL3422      | Uncharacterized protein (Fragment                                       | 0.999 | 2.0 |  | 3 | 2,070,988  | 170,251    |
| F1MD40   | F1MD40_BOVIN | COL6A6      | Uncharacterized protein                                                 | 1.000 | 4.8 |  | 3 | 20,670,715 | 11,429,080 |
| F1MD64   | F1MD64_BOVIN | FAM38A      | Uncharacterized protein (Fragment                                       | 0.999 | 3.0 |  | 3 | 3,723,836  | 472,237    |
| P27214   | ANX11_BOVIN  | ANXA11      | Annexin A11                                                             | 0.999 | 4.0 |  | 3 | 2,309,424  | 479,378    |
| P27214-2 | ANX11_BOVIN  | ANXA11      | isoform 2 of Annexin A11                                                | 0.999 | 4.0 |  | 3 | 2,309,424  | 479,378    |
| F1MD65   | F1MD65_BOVIN | ANXA11      | Uncharacterized protein                                                 | 0.999 | 4.0 |  | 3 | 2,309,424  | 479,378    |
| F1MD66   | F1MD66_BOVIN | ANXA11      | Uncharacterized protein                                                 | 0.999 | 4.0 |  | 3 | 2,309,424  | 479,378    |
| F1MUN7   | F1MUN7_BOVIN | ANXA11      | Uncharacterized protein                                                 | 0.999 | 4.0 |  | 3 | 2,309,424  | 479,378    |
| F1MD74   | F1MD74_BOVIN | CAST        | Uncharacterized protein                                                 | 0.999 | 2.6 |  | 3 | 334,961    | 41,654     |
| F1MR96   | F1MR96_BOVIN | CAST        | Uncharacterized protein                                                 | 0.999 | 2.3 |  | 3 | 334,961    | 41,654     |
| F1N161   | F1N161_BOVIN | CAST        | Uncharacterized protein                                                 | 0.999 | 2.3 |  | 3 | 334,961    | 41,654     |
| G3N2N7   | G3N2N7_BOVIN | CAST        | Uncharacterized protein                                                 | 0.999 | 4.1 |  | 3 | 334,961    | 41,654     |
| F1MD76   | F1MD76_BOVIN | BL82187     | Uncharacterized protein (Fragment                                       | 0.999 | 1.9 |  | 3 | 4,654,646  | 144,299    |
| F1MD79   | F1MD79_BOVIN | ANKFY1      | Uncharacterized protein (Fragment                                       | 0.999 | 1.9 |  | 3 | 2,784,613  | 565,148    |
| F1MD84   | F1MD84_BOVIN | CNNM1       | Uncharacterized protein (Fragment                                       | 1.000 | 1.7 |  | 3 | 3,156,992  | 374,379    |
| P55156   | MTP_BOVIN    | MTTP        | Microsomal triglyceride transfer protein large subunit (Fragment        | 0.999 | 3.2 |  | 3 | 751,898    | 137,419    |
| F1MDA1   | F1MDA1_BOVIN | P55156      | Uncharacterized protein                                                 | 0.999 | 3.1 |  | 3 | 751,898    | 137,419    |
| F1MDA6   | F1MDA6_BOVIN | VPS45       | Uncharacterized protein                                                 | 0.999 | 2.5 |  | 3 | 1,653,225  | 163,049    |
| F1MDB3   | F1MDB3_BOVIN | BL64559     | Glutamine synthetase (Fragment                                          | 0.999 | 5.0 |  | 3 | 1,031,679  | 108,648    |
| P15103   | GLNA_BOVIN   | GLUL        | Glutamine synthetase                                                    | 0.999 | 5.4 |  | 3 | 1,031,679  | 108,648    |
| F1MDB9   | F1MDB9_BOVIN | TACC2       | Uncharacterized protein (Fragment                                       | 0.999 | 1.9 |  | 3 | 2,321,126  | 382,853    |
| F1MDC1   | F1MDC1_BOVIN |             | Uncharacterized protein                                                 | 0.999 | 1.2 |  | 3 | 1,883,963  | 456,150    |
| F1MDC2   | F1MDC2_BOVIN | COL9A2      | Uncharacterized protein                                                 | 0.999 | 3.7 |  | 3 | 5,182,479  | 466,883    |
| F1MDC5   | F1MDC5_BOVIN | BL46274     | Uncharacterized protein (Fragment                                       | 1.000 | 2.2 |  | 3 | 1,556,024  | 224,456    |
| F1MQ30   | F1MQ30_BOVIN | FGD6        | Uncharacterized protein (Fragment                                       | 1.000 | 2.2 |  | 3 | 1,556,024  | 224,456    |
| F1MDD5   | F1MDD5_BOVIN | BL12589     | Uncharacterized protein (Fragment                                       | 0.999 | 0.7 |  | 3 | 4,447,038  | 985,775    |
| F1MWP1   | F1MWP1_BOVIN | BL25661     | Uncharacterized protein                                                 | 0.999 | 2.6 |  | 3 | 42,708,219 | 3,987,655  |
| F1MDE2   | F1MDE2_BOVIN | BL25661     | Uncharacterized protein (Fragment                                       | 0.999 | 2.7 |  | 3 | 42,708,219 | 3,987,655  |
| F1MDF3   | F1MDF3_BOVIN | ALS2        | Uncharacterized protein                                                 | 0.999 | 2.9 |  | 3 | 23,479,842 | 2,733,844  |
| F1MDI7   | F1MDI7_BOVIN | P2RY2       | Uncharacterized protein                                                 | 0.999 | 6.1 |  | 3 | 7,241,254  | 638,626    |
| F1MDJ4   | F1MDJ4_BOVIN | BL24278     | Uncharacterized protein                                                 | 0.999 | 2.5 |  | 3 | 4,769,583  | 415,403    |
| F1MDL5   | F1MDL5_BOVIN | BICC1       | Uncharacterized protein (Fragment                                       | 0.999 | 2.2 |  | 3 | 1,889,184  | 289,719    |
| F1MDL7   | F1MDL7_BOVIN |             | Uncharacterized protein (Fragment                                       | 0.999 | 2.2 |  | 3 | 2,002,594  | 190,167    |
| F1MV92   | F1MV92_BOVIN |             | Uncharacterized protein (Fragment                                       | 0.999 | 2.4 |  | 3 | 2,002,594  | 190,167    |
| F1MDP3   | F1MDP3_BOVIN | SMARCAL1    | Uncharacterized protein                                                 | 0.999 | 1.9 |  | 3 | 2,699,321  | 278,639    |
| F1MDS5   | F1MDS5_BOVIN | LRCH1       | Uncharacterized protein (Fragment                                       | 0.999 | 4.6 |  | 3 | 1,913,053  | 274,034    |

|        |              |                                 |                                        |       |  |                               |   |       |            |           |  |  |  |
|--------|--------------|---------------------------------|----------------------------------------|-------|--|-------------------------------|---|-------|------------|-----------|--|--|--|
|        |              |                                 |                                        |       |  | QLQVLLLENNPLQSPPAQICTKGVHIFK  | 3 | 0.999 |            |           |  |  |  |
| F1MDU7 | F1MDU7_BOVIN |                                 | DNA topoisomerase 2                    | 0.999 |  | 1.9                           |   |       | 52,111,404 | 8,315,061 |  |  |  |
|        |              |                                 |                                        |       |  | EDLAAFVEELEVEAKEK             | 3 | 0.999 |            |           |  |  |  |
|        |              |                                 |                                        |       |  | GIPVVEHKVEK                   | 3 | 0.999 |            |           |  |  |  |
| F1MDU9 | F1MDU9_BOVIN | LOC617204                       | Uncharacterized protein                | 1.000 |  | 1.0                           |   |       | 1,519,688  | 171,711   |  |  |  |
|        |              |                                 |                                        |       |  | VTAALQTQALYVGCALLSSQK         | 3 | 0.999 |            |           |  |  |  |
| Q2T9L8 | SYMC_BOVIN   | MARS                            | Methionyl-tRNA synthetase, cytoplasmic | 0.999 |  | 2.0                           |   |       | 246,939    | 37,053    |  |  |  |
| F1MDW1 | F1MDW1_BOVIN | MARS                            | Uncharacterized protein                | 0.999 |  | 2.0                           |   |       | 246,939    | 37,053    |  |  |  |
|        |              |                                 |                                        |       |  | LLTHITLQLQHYHQLLEK            | 3 | 0.999 |            |           |  |  |  |
| F1MDX6 | F1MDX6_BOVIN | GLB1L3                          | Beta-galactosidase (Fragment)          | 0.999 |  | 3.3                           |   |       | 5,768,746  | 611,672   |  |  |  |
|        |              |                                 |                                        |       |  | RVLCLVFLPFFVSSGFAPPAYR        | 3 | 0.999 |            |           |  |  |  |
| F1MDZ2 | F1MDZ2_BOVIN | NEF3                            | Uncharacterized protein                | 0.999 |  | 1.8                           |   |       | 232,214    | 27,054    |  |  |  |
| O7778  | NFM_BOVIN    | NEFM                            | Neurofilament medium polypeptide       | 0.999 |  | 1.8                           |   |       | 232,214    | 27,054    |  |  |  |
| F6PP75 | F6PP75_BOVIN | NFM                             | Uncharacterized protein                | 0.999 |  | 1.8                           |   |       | 232,214    | 27,054    |  |  |  |
|        |              |                                 |                                        |       |  | WEMARHLREYQDLLNVK             | 3 | 0.999 |            |           |  |  |  |
| F1ME37 | F1ME37_BOVIN | Bt.63162                        | Uncharacterized protein (Fragment)     | 0.999 |  | 10.9                          |   |       | 2,554,927  | 296,211   |  |  |  |
| F1MIP0 | F1MIP0_BOVIN | Bt.63162                        | Uncharacterized protein (Fragment)     | 0.999 |  | 8.1                           |   |       | 2,554,927  | 296,211   |  |  |  |
| F1MUL5 | F1MUL5_BOVIN | Bt.63162                        | Uncharacterized protein (Fragment)     | 0.999 |  | 8.5                           |   |       | 2,554,927  | 296,211   |  |  |  |
|        |              |                                 |                                        |       |  | LLADELSLESVLCSEAEAMK          | 3 | 0.999 |            |           |  |  |  |
|        |              |                                 |                                        |       |  | PLRIGYVESDGFQTPSPSMAR         | 3 | 0.999 |            |           |  |  |  |
| F1ME39 | F1ME39_BOVIN | JOSD2                           | Uncharacterized protein (Fragment)     | 0.999 |  | 11.5                          |   |       | 3,807,133  | 379,862   |  |  |  |
|        |              |                                 |                                        |       |  | RGAE DGMSQAPGAQPPSVYHER       | 3 | 0.999 |            |           |  |  |  |
| F1ME43 | F1ME43_BOVIN | FOX11                           | Uncharacterized protein                | 0.999 |  | 7.8                           |   |       | 8,989,188  | 1,840,833 |  |  |  |
|        |              |                                 |                                        |       |  | FPFYHDNRQGWONSIRHNSLNDCFEVK   | 3 | 0.999 |            |           |  |  |  |
| F1ME51 | F1ME51_BOVIN |                                 | Uncharacterized protein                | 0.999 |  | 4.0                           |   |       | 1,637,460  | 179,718   |  |  |  |
|        |              |                                 |                                        |       |  | TTGYGRVPCALCGWSPISWATPWNR     | 3 | 0.999 |            |           |  |  |  |
| F1ME62 | F1ME62_BOVIN | Bt.82462                        | Uncharacterized protein (Fragment)     | 0.999 |  | 1.6                           |   |       | 6,961,722  | 1,043,552 |  |  |  |
|        |              |                                 |                                        |       |  | PSFLTPDTSVATFLETAK            | 3 | 0.999 |            |           |  |  |  |
|        |              |                                 |                                        |       |  | QRAE PVSAPEDLDLPSTNEAEKAIEK   | 3 | 0.999 |            |           |  |  |  |
|        |              |                                 |                                        |       |  | SEGVSHEKTLVLEEK               | 3 | 0.999 |            |           |  |  |  |
| F1ME72 | F1ME72_BOVIN | Bt.15588                        | Uncharacterized protein                | 0.999 |  | 4.0                           |   |       | 1,849,450  | 533,251   |  |  |  |
|        |              |                                 |                                        |       |  | LPKPSMDFGK                    | 3 | 0.999 |            |           |  |  |  |
| F1ME89 | F1ME89_BOVIN | Bt.63967                        | Uncharacterized protein (Fragment)     | 0.999 |  | 3.8                           |   |       | 838,435    | 76,664    |  |  |  |
| F1N737 | F1N737_BOVIN | ZBBX                            | Uncharacterized protein                | 0.999 |  | 2.4                           |   |       | 838,435    | 76,664    |  |  |  |
|        |              |                                 |                                        |       |  | PITEYQGLERFFVDFKNER           | 3 | 0.999 |            |           |  |  |  |
| Q75WB5 | OPLA_BOVIN   | OPLAH                           | 5-oxoprolinase                         | 0.999 |  | 1.0                           |   |       | 3,097,950  | 229,965   |  |  |  |
| F1ME97 | F1ME97_BOVIN | OPLAH                           | Uncharacterized protein                | 0.999 |  | 1.0                           |   |       | 3,097,950  | 229,965   |  |  |  |
|        |              |                                 |                                        |       |  | DRPLDTSRIASIR                 | 3 | 0.999 |            |           |  |  |  |
| Q3B7M3 | FA65B_BOVIN  | FAM65B                          | Protein FAM65B                         | 0.999 |  | 1.8                           |   |       | 527,020    | 65,209    |  |  |  |
| F1ME99 | F1ME99_BOVIN | FAM65B                          | Uncharacterized protein                | 0.999 |  | 1.8                           |   |       | 527,020    | 65,209    |  |  |  |
|        |              |                                 |                                        |       |  | DSSSASCSSSSREGSEPR            | 3 | 0.999 |            |           |  |  |  |
| F1MEH3 | F1MEH3_BOVIN | Bt.45180                        | Uncharacterized protein                | 0.999 |  | 7.6                           |   |       | 2,505,827  | 234,656   |  |  |  |
|        |              |                                 |                                        |       |  | LPLSHVLDVLEGRAHQHGGVLYVQK     | 3 | 0.999 |            |           |  |  |  |
| F1MEH8 | F1MEH8_BOVIN |                                 | Uncharacterized protein (Fragment)     | 0.999 |  | 38.2                          |   |       | 1,340,383  | 183,267   |  |  |  |
| F1MFJ2 | F1MFJ2_BOVIN | Bt.61594                        | Uncharacterized protein (Fragment)     | 0.999 |  | 2.9                           |   |       | 1,340,383  | 183,267   |  |  |  |
|        |              |                                 |                                        |       |  | RTLPLHVAALGDAEIELLLISGARVNAK  | 3 | 0.999 |            |           |  |  |  |
| F1MEM9 | F1MEM9_BOVIN | TTC19                           | Uncharacterized protein                | 0.999 |  | 4.9                           |   |       | 2,549,650  | 1,025,826 |  |  |  |
|        |              |                                 |                                        |       |  | RDEASVQHIRELAELAR             | 3 | 0.999 |            |           |  |  |  |
| F1MEN2 | F1MEN2_BOVIN | SPECC1                          | Uncharacterized protein (Fragment)     | 0.999 |  | 3.0                           |   |       | 7,010,781  | 255,342   |  |  |  |
|        |              |                                 |                                        |       |  | TQDSEGGDALDSSVDGASVLPDSEPLIR  | 3 | 0.999 |            |           |  |  |  |
| Q1JP73 | CIO84_BOVIN  | UPF0553 protein C9orf64 homolog | 0.999                                  |       |  | 5.6                           |   |       | 1,222,931  | 373,113   |  |  |  |
| F1MEP1 | F1MEP1_BOVIN | C9ORF64                         | Uncharacterized protein                | 0.999 |  | 5.6                           |   |       | 1,222,931  | 373,113   |  |  |  |
|        |              |                                 |                                        |       |  | HILRSDDVPMPLIEERHR            | 3 | 0.999 |            |           |  |  |  |
| F1MEQ5 | F1MEQ5_BOVIN | DARS2                           | Uncharacterized protein                | 0.999 |  | 7.1                           |   |       | 3,598,899  | 232,287   |  |  |  |
|        |              |                                 |                                        |       |  | FIMEEQGLVVKLETOEEDVLLTAGEHK   | 3 | 0.999 |            |           |  |  |  |
|        |              |                                 |                                        |       |  | IHNSELQHYLDTVLK               | 3 | 0.999 |            |           |  |  |  |
| F1MER4 | F1MER4_BOVIN | VIT                             | Uncharacterized protein                | 0.999 |  | 5.7                           |   |       | 2,286,741  | 492,030   |  |  |  |
| Q95L12 | VITRN_BOVIN  | VITRIN                          | Vitron                                 | 0.999 |  | 5.7                           |   |       | 2,286,741  | 492,030   |  |  |  |
|        |              |                                 |                                        |       |  | GGAPNVAVMVDGWPTDK             | 3 | 0.999 |            |           |  |  |  |
|        |              |                                 |                                        |       |  | GVTYPSLTYSSSKSPAAK            | 3 | 0.999 |            |           |  |  |  |
| F1MER5 | F1MER5_BOVIN | MICALCL                         | Uncharacterized protein (Fragment)     | 0.999 |  | 3.4                           |   |       | 513,659    | 35,341    |  |  |  |
| G3MYZ8 | G3MYZ8_BOVIN | MICALCL                         | Uncharacterized protein (Fragment)     | 0.999 |  | 3.4                           |   |       | 513,659    | 35,341    |  |  |  |
| G3N2C8 | G3N2C8_BOVIN | MICALCL                         | Uncharacterized protein (Fragment)     | 0.999 |  | 3.4                           |   |       | 513,659    | 35,341    |  |  |  |
|        |              |                                 |                                        |       |  | STRNGSGGHVLPVHPHLLPLAEK       | 3 | 0.999 |            |           |  |  |  |
| F1MER7 | F1MER7_BOVIN | HSPG2                           | Uncharacterized protein (Fragment)     | 1.000 |  | 1.5                           |   |       | 3,025,940  | 203,357   |  |  |  |
|        |              |                                 |                                        |       |  | AHSV EECRCPIGYSGLSCEDAHFTR    | 3 | 0.999 |            |           |  |  |  |
|        |              |                                 |                                        |       |  | AOVHRGILRPAVEASDQGQLCR        | 3 | 0.844 |            |           |  |  |  |
|        |              |                                 |                                        |       |  | LRPGVQGGIVRIAR                | 3 | 0.999 |            |           |  |  |  |
| F1MET4 | F1MET4_BOVIN | MEGF10                          | Uncharacterized protein                | 0.999 |  | 1.4                           |   |       | 1,889,413  | 228,042   |  |  |  |
|        |              |                                 |                                        |       |  | HCEQKCPAGTYGYGCR              | 3 | 0.999 |            |           |  |  |  |
| F1MM14 | F1MM14_BOVIN | Bt.2052                         | Uncharacterized protein                | 0.999 |  | 3.5                           |   |       | 12,423,302 | 5,359,523 |  |  |  |
| F1MET6 | F1MET6_BOVIN | Bt.77725                        | Uncharacterized protein (Fragment)     | 0.999 |  | 5.9                           |   |       | 12,423,302 | 5,359,523 |  |  |  |
|        |              |                                 |                                        |       |  | ISTYGLLPGGIQPLPQTIKKI         | 3 | 0.999 |            |           |  |  |  |
| F1MEU0 | F1MEU0_BOVIN | RP9                             | Uncharacterized protein (Fragment)     | 1.000 |  | 13.2                          |   |       | 7,319,683  | 625,506   |  |  |  |
|        |              |                                 |                                        |       |  | AASAAPRGAAAMSSRAR             | 3 | 0.999 |            |           |  |  |  |
|        |              |                                 |                                        |       |  | PEDCIPDPVGNHEAR               | 3 | 0.999 |            |           |  |  |  |
| F1MEU2 | F1MEU2_BOVIN |                                 | Uncharacterized protein                | 0.999 |  | 1.5                           |   |       | 526,214    | 83,160    |  |  |  |
| F1MRP6 | F1MRP6_BOVIN | Bt.2303                         | Uncharacterized protein                | 0.999 |  | 1.4                           |   |       | 526,214    | 83,160    |  |  |  |
| Q32524 | COBA2_BOVIN  | COL11A2                         | Collagen alpha-2(XI) chain             | 0.999 |  | 1.4                           |   |       | 526,214    | 83,160    |  |  |  |
|        |              |                                 |                                        |       |  | PGLPGMPGSDGPPGHPGKEGPPGTK     | 3 | 0.999 |            |           |  |  |  |
| F1MEU3 | F1MEU3_BOVIN | Bt.105691                       | Uncharacterized protein (Fragment)     | 0.999 |  | 2.4                           |   |       | 1,426,915  | 115,311   |  |  |  |
|        |              |                                 |                                        |       |  | AVMSSGHALSPIKPLLRSEFNILAVLQK  | 3 | 0.999 |            |           |  |  |  |
| F1MEV7 | F1MEV7_BOVIN | RLN3                            | Uncharacterized protein (Fragment)     | 0.999 |  | 19.9                          |   |       | 10,848,393 | 2,459,130 |  |  |  |
|        |              |                                 |                                        |       |  | SMVRHLVLLLLALGVLTLGELLPRTEAR  | 3 | 0.999 |            |           |  |  |  |
| F1MEW4 | F1MEW4_BOVIN | CBS                             | Uncharacterized protein                | 0.999 |  | 3.3                           |   |       | 3,107,056  | 263,962   |  |  |  |
|        |              |                                 |                                        |       |  | SAGCPHLGSAHLGRSLEK            | 3 | 0.999 |            |           |  |  |  |
| F1MEY0 | F1MEY0_BOVIN | Bt.105538                       | Uncharacterized protein                | 0.999 |  | 3.6                           |   |       | 4,664,960  | 523,984   |  |  |  |
|        |              |                                 |                                        |       |  | DSTINNESSQSCSSGR              | 3 | 0.999 |            |           |  |  |  |
|        |              |                                 |                                        |       |  | TAPLVLRPRDSSMDGQSSAETISR      | 3 | 0.999 |            |           |  |  |  |
| F1MEY1 | F1MEY1_BOVIN | Bt.105691                       | Uncharacterized protein                | 0.999 |  | 3.5                           |   |       | 24,003,273 | 4,052,904 |  |  |  |
|        |              |                                 |                                        |       |  | AVMSSGHALSPIKPLLRSEFNILAVLQK  | 3 | 0.999 |            |           |  |  |  |
|        |              |                                 |                                        |       |  | LEALECSTNEKLEPGPDVEVK         | 3 | 0.999 |            |           |  |  |  |
| F1MF11 | F1MF11_BOVIN | PLCH1                           | Uncharacterized protein (Fragment)     | 0.999 |  | 0.7                           |   |       | 3,786,883  | 423,089   |  |  |  |
|        |              |                                 |                                        |       |  | GMCSYVENLLR                   | 3 | 0.999 |            |           |  |  |  |
| F1MF21 | F1MF21_BOVIN | Bt.40622                        | Uncharacterized protein                | 0.936 |  | 3.1                           |   |       | 10,850,930 | 145,629   |  |  |  |
|        |              |                                 |                                        |       |  | CSDLTSCNENYANISPSR            | 3 | 0.843 |            |           |  |  |  |
| F1MF28 | F1MF28_BOVIN | Bt.48155                        | Uncharacterized protein                | 0.999 |  | 3.1                           |   |       | 872,213    | 126,755   |  |  |  |
| G5E6L9 | G5E6L9_BOVIN | Bt.48155                        | Uncharacterized protein (Fragment)     | 0.999 |  | 3.4                           |   |       | 872,213    | 126,755   |  |  |  |
|        |              |                                 |                                        |       |  | VPAGPKASVVAHLR                | 3 | 0.999 |            |           |  |  |  |
| F1MF39 | F1MF39_BOVIN | THSD7B                          | Uncharacterized protein (Fragment)     | 0.999 |  | 0.9                           |   |       | 80,515,933 | 292,100   |  |  |  |
| G3NOH1 | G3NOH1_BOVIN | THSD7B                          | Uncharacterized protein (Fragment)     | 0.999 |  | 0.9                           |   |       | 80,515,933 | 292,100   |  |  |  |
|        |              |                                 |                                        |       |  | AAACVTAHQHGLQHR               | 3 | 0.999 |            |           |  |  |  |
| F1MF53 | F1MF53_BOVIN | Bt.349                          | Uncharacterized protein                | 0.999 |  | 2.4                           |   |       | 3,296,040  | 369,164   |  |  |  |
| F1MV10 | F1MV10_BOVIN | CNTN1                           | Uncharacterized protein                | 0.999 |  | 2.4                           |   |       | 3,296,040  | 369,164   |  |  |  |
|        |              |                                 |                                        |       |  | EYHYGNNGFYIAFKFPDGEWKK        | 3 | 0.999 |            |           |  |  |  |
| F1MF78 | F1MF78_BOVIN | SYNE2                           | Uncharacterized protein (Fragment)     | 1.000 |  | 0.6                           |   |       | 7,191,328  | 730,874   |  |  |  |
|        |              |                                 |                                        |       |  | EEFNHLEVVDKINQICKNLQFHLNK     | 3 | 0.999 |            |           |  |  |  |
|        |              |                                 |                                        |       |  | EVILDLNQEVEPEISK              | 3 | 0.822 |            |           |  |  |  |
| F1MF87 | F1MF87_BOVIN | Bt.91527                        | Uncharacterized protein (Fragment)     | 1.000 |  | 1.5                           |   |       | 3,972,005  | 239,511   |  |  |  |
|        |              |                                 |                                        |       |  | FALIAVPSIRLSPOAKSHLR          | 3 | 0.999 |            |           |  |  |  |
|        |              |                                 |                                        |       |  | SQAASSSPVTIKPK                | 3 | 0.999 |            |           |  |  |  |
| F1MFA7 | F1MFA7_BOVIN | LOC535781                       | Uncharacterized protein (Fragment)     | 0.999 |  | 2.3                           |   |       | 2,206,121  | 263,887   |  |  |  |
|        |              |                                 |                                        |       |  | LTSKNAQLQSESNLSQSFQDK         | 3 | 0.999 |            |           |  |  |  |
| F1MFD2 | F1MFD2_BOVIN | MLL5                            | Uncharacterized protein                | 0.999 |  | 1.1                           |   |       | 2,643,453  | 295,755   |  |  |  |
|        |              |                                 |                                        |       |  | GSAPEIDPSSDVISNFGWETK         | 3 | 0.999 |            |           |  |  |  |
| Q0V8F1 | COR07_BOVIN  | COR07                           | Coronin-7                              | 0.999 |  | 3.1                           |   |       | 12,111,402 | 1,321,904 |  |  |  |
| F1MFD6 | F1MFD6_BOVIN | COR07                           | Uncharacterized protein                | 0.999 |  | 3.1                           |   |       | 12,111,402 | 1,321,904 |  |  |  |
|        |              |                                 |                                        |       |  | LQGHRDQIFGLAWSVDPGQQLATVCKDGR | 3 | 0.999 |            |           |  |  |  |
| F1MF15 | F1MF15_BOVIN | Bt.65958                        | Uncharacterized protein (Fragment)     | 0.999 |  | 0.5                           |   |       | 849,410    | 109,580   |  |  |  |
|        |              |                                 |                                        |       |  | QATLPAACRR                    | 3 | 0.999 |            |           |  |  |  |
| F1N203 | F1N203_BOVIN | Bt.56804                        | Uncharacterized protein (Fragment)     | 0.999 |  | 5.7                           |   |       | 723,209    | 157,603   |  |  |  |
| Q0IIF9 | CP2U1_BOVIN  | CYP2U1                          | Cytochrome P450 2U1                    | 0.999 |  | 5.2                           |   |       | 723,209    | 157,603   |  |  |  |
| F1MF19 | F1MF19_BOVIN | CYP2U1                          | Uncharacterized protein                | 0.999 |  | 5.2                           |   |       | 723,209    | 157,603   |  |  |  |
|        |              |                                 |                                        |       |  | HGDAPFNFPPIVNAVSNIIICSLCFGR   | 3 | 0.999 |            |           |  |  |  |
| G3MXS7 | G3MXS7_BOVIN | Bt.92027                        | Uncharacterized protein                | 0.999 |  | 1.9                           |   |       | 1,159,750  | 91,865    |  |  |  |

|        |              |             |                                                                      |       |                                   |   |            |            |            |
|--------|--------------|-------------|----------------------------------------------------------------------|-------|-----------------------------------|---|------------|------------|------------|
| F1MFJ3 | F1MFJ3_BOVIN | BT92027     | Uncharacterized protein (Fragment)                                   | 0.999 | 2.0                               |   | 1,159,750  | 91,865     |            |
| F1MFJ7 | F1MFJ7_BOVIN | SESN3       | Uncharacterized protein (Fragment)                                   | 0.999 | EVESSQLHSYVNSILIPGVGGKTR          | 3 | 0.999      | 9,616,854  | 811,940    |
| F1MFL5 | F1MFL5_BOVIN | SAP30L      | Uncharacterized protein                                              | 0.999 | AQDYTWENHGFLVNR                   | 3 | 0.999      | 3,448,414  | 1,286,523  |
| F1MFM6 | F1MFM6_BOVIN | Bt.64897    | Uncharacterized protein                                              | 0.999 | SVRHLVICDFHKNFIQSVR               | 3 | 0.999      | 1,148,004  | 128,883    |
| P20959 | IBP3_BOVIN   | IGFBP3      | Insulin-like growth factor-binding protein                           | 0.999 | 8.3                               |   | 1,148,004  | 128,883    |            |
| F1MFNO | F1MFNO_BOVIN | Bt.63633    | Uncharacterized protein (Fragment)                                   | 0.999 | YGQPLPGFDVKGKGDVHCYSMESK          | 3 | 0.999      | 588,275    | 101,696    |
| F1MJ9A | F1MJ9A_BOVIN | KCN2G       | Uncharacterized protein (Fragment)                                   | 0.999 | 6.3                               |   | 588,275    | 101,696    |            |
| F1MFP1 | F1MFP1_BOVIN | SPATA5      | Uncharacterized protein (Fragment)                                   | 1.000 | EFGLLLFLCVAMALFAPLVHLAERELGAR     | 3 | 0.999      | 6,569,717  | 948,810    |
| F1MFR1 | F1MFR1_BOVIN | Bt.26256    | Uncharacterized protein                                              | 0.999 | MAGLVKITLQDFLQGMNDIR              | 3 | 0.999      | 757,173    | 111,369    |
| F1MFT9 | F1MFT9_BOVIN | MTMR3       | Uncharacterized protein                                              | 0.999 | TASNSHYVTLIIGDADNQLVFK            | 3 | 0.999      | 18,595,717 | 2,445,842  |
| F1MFU2 | F1MFU2_BOVIN | KCTD9       | Uncharacterized protein                                              | 0.999 | PVLAHCSGDGWDRTPOIVALAK            | 3 | 0.999      | 19,520,259 | 847,155    |
| F1MFU5 | F1MFU5_BOVIN | RPAP3       | Uncharacterized protein                                              | 0.999 | FFGIDSLIEHLEVAIKNSQPPEDHSPISRK    | 3 | 0.999      | 939,993    | 155,086    |
| F1NOV7 | F1NOV7_BOVIN | RPAP3       | Uncharacterized protein                                              | 0.999 | 10.8                              |   | 939,993    | 155,086    |            |
| F1MFU7 | F1MFU7_BOVIN | Bt.103493   | Uncharacterized protein                                              | 0.999 | FAVAESDNCIALALNRSYTKAYAR          | 3 | 0.999      | 1,820,373  | 276,466    |
| F1MFW0 | F1MFW0_BOVIN | Bt.55894    | Uncharacterized protein (Fragment)                                   | 0.999 | TKMGFVEEMDMQSSSR                  | 3 | 0.999      | 1,222,800  | 122,257    |
| G3MXG5 | G3MXG5_BOVIN | Bt.55894    | Uncharacterized protein (Fragment)                                   | 0.999 | 9.3                               |   | 1,222,800  | 122,257    |            |
| F1MFX9 | F1MFX9_BOVIN | Bt.42860    | Uncharacterized protein (Fragment)                                   | 0.999 | LARASRDVAQLSGTLEEEK               | 3 | 0.999      | 13,479,049 | 1,171,884  |
| F1MFY5 | F1MFY5_BOVIN | LOC768315   | Uncharacterized protein                                              | 1.000 | ITDTSLVFSAESDSGVYMR               | 3 | 0.999      | 3,606,694  | 432,585    |
| F1MPW9 | F1MPW9_BOVIN | LOC768315   | Uncharacterized protein                                              | 1.000 | LVVVEADSVIGIISLQALITPAGAK         | 3 | 0.999      | 3,606,694  | 432,585    |
| F1MFY6 | F1MFY6_BOVIN | LOC790293   | Uncharacterized protein                                              | 0.999 | NNMIETWNKVRSPGQDK                 | 3 | 0.999      | 1,258,764  | 210,048    |
| F1MFY7 | F1MFY7_BOVIN | ANO6        | Uncharacterized protein (Fragment)                                   | 0.999 | YYPNVRDQVMVAKGTLPLSR              | 3 | 0.999      | 1,154,820  | 228,248    |
| F1MFZ5 | F1MFZ5_BOVIN | UNC45B      | Uncharacterized protein (Fragment)                                   | 0.999 | GERGTGPGGAIGPGQPGSGAMGPPGLK       | 3 | 0.999      | 1,695,046  | 316,743    |
| F1MFZ6 | F1MFZ6_BOVIN | Bt.35104    | Uncharacterized protein                                              | 0.999 | AIWNNIQEVLPPW/MNVFGRRCRTVSGAEK    | 3 | 0.999      | 15,427,613 | 10,003,125 |
| F1MFZ9 | F1MFZ9_BOVIN | Bt.22683    | Uncharacterized protein                                              | 0.999 | ICSLMAVESEEMSLAVCNLLOIGIDALSGEDK  | 3 | 0.999      | 5,828,175  | 449,614    |
| F1MG06 | F1MG06_BOVIN | Bt.88378    | Uncharacterized protein                                              | 1.000 | AASLRGGVGVGAPGSPPTPR              | 3 | 0.999      | 4,416,431  | 2,041,786  |
| F1MG08 | F1MG08_BOVIN | SPPL2A      | Uncharacterized protein (Fragment)                                   | 0.999 | PSPPRGLVAAVSGESDSEEEQER           | 3 | 0.999      | 1,553,596  | 137,954    |
| F1MG13 | F1MG13_BOVIN | MYO15A      | Uncharacterized protein (Fragment)                                   | 0.999 | DNGHKYFVLSVADPYMPAEHR             | 3 | 0.890      | 2,173,455  | 470,464    |
| F1MG22 | F1MG22_BOVIN | Bt.26387    | Uncharacterized protein (Fragment)                                   | 0.999 | ILSTSSLTQSAPASPTNK                | 3 | 0.999      | 567,372    | 67,706     |
| F1N246 | F1N246_BOVIN | GRIK1       | Uncharacterized protein (Fragment)                                   | 0.999 | 3.1                               |   | 567,372    | 67,706     |            |
| F1MG24 | F1MG24_BOVIN | 785381      | Uncharacterized protein                                              | 1.000 | SEFLDVKILIAFINHK                  | 3 | 0.999      | 41,650,450 | 4,027,112  |
| F1MG39 | F1MG39_BOVIN | SPOCD1      | Uncharacterized protein (Fragment)                                   | 0.999 | PMPGPAPTTLAPLALAPGLPPAISPYSSLR    | 3 | 0.999      | 2,337,924  | 170,284    |
| F1MNK4 | F1MNK4_BOVIN | SPOCD1      | Uncharacterized protein (Fragment)                                   | 0.999 | 0.9                               |   | 2,337,924  | 170,284    |            |
| F1MG60 | F1MG60_BOVIN | RAG1        | Uncharacterized protein                                              | 1.000 | NHAFQRTSQQVPSFDDMPQNKAK           | 3 | 0.999      | 1,990,354  | 244,552    |
| F1MG62 | F1MG62_BOVIN | BOSTAU1R437 | Uncharacterized protein (Fragment)                                   | 0.999 | VVHGDIPTHGLVIRMSVLAPOELAR         | 3 | 0.907      | 260,842    | 25,259     |
| F1MGV6 | F1MGV6_BOVIN | BOSTAU1R437 | Uncharacterized protein (Fragment)                                   | 0.999 | 2.1                               |   | 260,842    | 25,259     |            |
| F1N263 | F1N263_BOVIN | BOSTAU1R437 | Uncharacterized protein (Fragment)                                   | 0.999 | ESCDDMGDVSSEKHGSGPAPVEK           | 3 | 0.999      | 250,842    | 25,259     |
| F1MG84 | F1MG84_BOVIN | Bt.81171    | Uncharacterized protein (Fragment)                                   | 0.999 | LSPKAPPEER                        | 1 | 0.999      | 10,171,208 | 2,472,450  |
| F1MG90 | F1MG90_BOVIN | Bt.26722    | Uncharacterized protein                                              | 0.999 | SNHHCHMSAYEKSPFIK                 | 3 | 0.999      | 2,213,483  | 212,926    |
| F1MG92 | F1MG92_BOVIN | P35816      | Uncharacterized protein (Fragment)                                   | 0.999 | LVDTLPAPEVSEVSVLVLGFVK            | 3 | 0.999      | 520,594    | 121,838    |
| P35816 | PDP1_BOVIN   | PDP1        | [Pyruvate dehydrogenase [acetyl-transferring]]-phosphatase 1, mitoch | 0.999 | 5.1                               |   | 520,594    | 121,838    |            |
| O02776 | PARG_BOVIN   | PARG        | Poly(ADP-ribose) glycohydrolase                                      | 1.000 | VPEFDGKNVSVLGFDSNQLPANAPIEDRR     | 3 | 0.999      | 5,357,435  | 480,941    |
| F1MG95 | F1MG95_BOVIN | PARG        | Uncharacterized protein                                              | 1.000 | 5.2                               |   | 5,357,435  | 480,941    |            |
| F1MGD9 | F1MGD9_BOVIN | Bt.88548    | Uncharacterized protein (Fragment)                                   | 0.999 | GGEIRLHFQFGGSEFRAGMNDVNAK         | 3 | 0.999      | 98,406,041 | 51,767,092 |
| F1MGE1 | F1MGE1_BOVIN | FRMD5       | Uncharacterized protein (Fragment)                                   | 0.999 | PGVSSNLSAVATGNWGCGAFGGDAR         | 3 | 0.999      | 2,119,097  | 567,604    |
| F1MGE4 | F1MGE4_BOVIN | LOC616964   | Uncharacterized protein (Fragment)                                   | 0.999 | RKFISLFYTVTPALNPLYTLR             | 3 | 0.999      | 32,289,208 | 3,000,074  |
| F1MGF6 | F1MGF6_BOVIN | MUC19       | Uncharacterized protein (Fragment)                                   | 0.999 | FYPADPAALKEITRYLVFLQIK            | 3 | 0.999      | 46,414,387 | 17,970,083 |
| F1MGG2 | F1MGG2_BOVIN | HNF4G       | Uncharacterized protein                                              | 0.999 | ALKRFVGIUQNHNHELFCFC              | 3 | 0.999      | 1,569,760  | 222,812    |
| F1N2D7 | F1N2D7_BOVIN | HNF4G       | Uncharacterized protein                                              | 0.999 | 2.5                               |   | 1,569,760  | 222,812    |            |
| F1MGG4 | F1MGG4_BOVIN | ZNF664      | Uncharacterized protein                                              | 0.999 | DGILLCQTPIDLTLQNCGGAEVDCRNPK      | 3 | 0.999      | 2,346,446  | 240,138    |
| F1MGG8 | F1MGG8_BOVIN | Bt.88826    | Uncharacterized protein                                              | 0.999 | SRQISVSSPGASADINVK                | 3 | 0.999      | 5,690,349  | 940,609    |
| F1MG10 | F1MG10_BOVIN | NACAD       | Uncharacterized protein (Fragment)                                   | 0.999 | HTSSLCMQHRVHTGKPYK                | 3 | 0.999      | 1,149,685  | 210,664    |
| F1MG12 | F1MG12_BOVIN |             | Uncharacterized protein (Fragment)                                   | 0.999 | 3.6                               |   | 6,775,471  | 492,716    |            |
| F1MGK5 | F1MGK5_BOVIN | Bt.39123    | Uncharacterized protein                                              | 1.000 | DQAGDGHGSGGGKNSGGGKGGSGSK         | 3 | 0.999      | 7,293,600  | 454,490    |
| F1MGL3 | F1MGL3_BOVIN | Bt.27409    | Uncharacterized protein (Fragment)                                   | 0.984 | SSPLGQSDHSEYVPMPLPKG              | 3 | 0.999      | 3,936,125  | 409,096    |
| F1MGM4 | F1MGM4_BOVIN | Bt.48644    | Uncharacterized protein                                              | 0.999 | APSAAVTQAEVGGSPGPAEVRPTGGLPASLEPR | 3 | 0.999      | 442,653    | 103,752    |
| F1MT91 | F1MT91_BOVIN | Bt.8905     | Uncharacterized protein (Fragment)                                   | 0.999 | LLLLCVSVCSRR                      | 3 | 0.999      | 3,791,554  | 1,085,607  |
| F1MGQ5 | F1MGQ5_BOVIN | ITCH        | Uncharacterized protein                                              | 0.999 | QENPSTSLDSNGAALADGNIAESLESLV      | 3 | 0.999      | 3,791,554  | 1,085,607  |
| F1MGQ6 | F1MGQ6_BOVIN | KRT6A       | Uncharacterized protein                                              | 1.000 | SPPTNVPQKHNKDGK                   | 3 | 0.999      | 9,406,364  | 743,593    |
| F1MGS8 | F1MGS8_BOVIN | NAALAD2     | Uncharacterized protein                                              | 1.000 | LHFRVWSHQTLKSDVLLGTAGLDIYETLK     | 3 | 0.999      | 1,199,521  | 134,711    |
| F1MGT1 | F1MGT1_BOVIN | SYNE1       | Uncharacterized protein (Fragment)                                   | 1.000 | 1.2                               |   | 10,408,304 | 944,993    |            |
|        |              |             |                                                                      |       | AGYEEIAQR                         | 2 | 0.973      |            |            |
|        |              |             |                                                                      |       | NKYEEINQR                         | 3 | 1.000      |            |            |
|        |              |             |                                                                      |       | NLDLSIAEVK                        | 2 | 0.999      |            |            |
|        |              |             |                                                                      |       | WTLTQEQTGK                        | 2 | 0.987      |            |            |
|        |              |             |                                                                      |       | 5.8                               |   |            |            |            |
|        |              |             |                                                                      |       | NKYAGESFPGIFDAMFDIENKADPHSAWK     | 3 | 0.999      |            |            |
|        |              |             |                                                                      |       | SIYSSRKHQACR                      | 3 | 0.902      |            |            |
|        |              |             |                                                                      |       | 0.8                               |   |            |            |            |
|        |              |             |                                                                      |       | EHMTLEKGLHLTKFSDK                 | 3 | 0.999      |            |            |
|        |              |             |                                                                      |       | ELVKEQTSHLEQRWFQLEDLVK            | 3 | 0.823      |            |            |
|        |              |             |                                                                      |       | NVISEKORTLYEALER                  | 3 | 0.999      |            |            |
|        |              |             |                                                                      |       | QWKDLQAEAPYHLLHLK                 | 3 | 0.999      |            |            |



|        |              |              |                                                            |       |                      |                                  |       |         |                       |
|--------|--------------|--------------|------------------------------------------------------------|-------|----------------------|----------------------------------|-------|---------|-----------------------|
|        |              |              |                                                            |       | GTGIEQFHLDKEGSPVLLDR | 3                                | 0.999 |         |                       |
| F1MIP6 | F1MIP6_BOVIN | LOC510257    | Uncharacterized protein (Fragment)                         | 0.999 | 8.6                  |                                  |       | 446,448 | 42,289                |
| F1MJC1 | F1MJC1_BOVIN | LOC510257    | Uncharacterized protein (Fragment)                         | 0.999 | 8.9                  |                                  |       | 446,448 | 42,289                |
| F1MKP2 | F1MKP2_BOVIN | LOC510257    | Uncharacterized protein (Fragment)                         | 0.999 | 8.7                  |                                  |       | 446,448 | 42,289                |
| G3N008 | G3N008_BOVIN | LOC510257    | Uncharacterized protein (Fragment)                         | 0.999 | 9.0                  |                                  |       | 446,448 | 42,289                |
| F1MIU1 | F1MIU1_BOVIN | Bt.76461     | Uncharacterized protein (Fragment)                         | 0.999 |                      | DTVATVMTYVTVMNLNPFYSLRNRDLK      | 3     | 0.999   | 2,575,017 457,695     |
| F1MIV1 | F1MIV1_BOVIN | ZBTB34       | Uncharacterized protein (Fragment)                         | 0.999 |                      | LTPDGLGDRDADWELLAPPASGDHVILK     | 3     | 0.999   | 845,421 124,570       |
| F1MIV2 | F1MIV2_BOVIN | SLC2A12      | Uncharacterized protein                                    | 0.999 |                      | CFPFQGTLNQHLRKNHPGVAEVR          | 3     | 0.999   | 7,110,267 2,526,302   |
| F1MIY8 | F1MIY8_BOVIN | ADAM8        | Uncharacterized protein (Fragment)                         | 0.999 |                      | NDINGKGETTLASLPSNAGLSQTEYR       | 3     | 0.999   | 2,333,418 451,852     |
| F1MIZ7 | F1MIZ7_BOVIN | TROVE2       | Uncharacterized protein                                    | 0.999 |                      | ASPPSPPLVYPQPAPQQLRPPAKPLVLK     | 3     | 0.999   | 3,292,238 675,422     |
| F1MJ07 | F1MJ07_BOVIN | Bt.62452     | Uncharacterized protein (Fragment)                         | 0.999 |                      | GGMALALAVTKYKQR                  | 3     | 0.999   | 8,114,510 2,994,091   |
| F1MJ08 | F1MJ08_BOVIN | QRICH2       | Uncharacterized protein (Fragment)                         | 0.999 |                      |                                  | 3     | 0.999   | 8,114,510 2,994,091   |
|        |              |              |                                                            |       |                      | RESLDKLAFLSPFPAVETFR             | 3     | 0.999   |                       |
|        |              |              |                                                            |       |                      | SIPDLQEQKTKL                     | 3     | 0.999   |                       |
|        |              |              |                                                            |       |                      | TFSGTSGIGYFDPGSPGRER             | 3     | 0.999   |                       |
| F1MJ15 | F1MJ15_BOVIN |              | Uncharacterized protein (Fragment)                         | 0.999 |                      | TRNINSLALGPAAGVGGCVR             | 3     | 0.999   | 3,291,413 1,108,715   |
| F1MJ19 | F1MJ19_BOVIN | PCIF1        | Uncharacterized protein                                    | 0.999 |                      |                                  | 3     | 0.999   | 2,921,535 386,906     |
|        |              |              |                                                            |       |                      | ELCQREGIEPPRESFNR                | 3     | 0.999   |                       |
|        |              |              |                                                            |       |                      | MANENHGSPPREASLLHSPTSSQSPCSPK    | 3     | 0.999   |                       |
| F1MVT1 | F1MVT1_BOVIN | Bt.46601     | Uncharacterized protein                                    | 0.999 |                      |                                  | 3     | 0.999   | 682,730 250,610       |
| F1MJ47 | F1MJ47_BOVIN |              | Uncharacterized protein (Fragment)                         | 0.999 |                      |                                  | 3     | 0.999   | 682,730 250,610       |
|        |              |              |                                                            |       |                      | FVNDTSIQVGLSLFTVMAYK             | 3     | 0.999   |                       |
| F1MJ71 | F1MJ71_BOVIN | LOC100335993 | Uncharacterized protein (Fragment)                         | 0.999 |                      |                                  | 3     | 0.999   | 3,098,142 491,003     |
|        |              |              |                                                            |       |                      | GEHGEKGVWPGFLGDR                 | 3     | 0.999   |                       |
| F1MJ88 | F1MJ88_BOVIN | ZNF345       | Uncharacterized protein                                    | 0.999 |                      |                                  | 3     | 0.999   | 15,906,225 11,255,989 |
|        |              |              |                                                            |       |                      | DERIHASDKLLECK                   | 3     | 0.999   |                       |
|        |              |              |                                                            |       |                      | PYECKEGKAFSFGSLIR                | 3     | 0.999   |                       |
| F1MZA2 | F1MZA2_BOVIN | ARHGFE12     | Uncharacterized protein                                    | 0.999 |                      |                                  | 3     | 0.999   | 1,165,683 164,166     |
| F1MJ92 | F1MJ92_BOVIN | Bt.52588     | Uncharacterized protein (Fragment)                         | 0.999 |                      |                                  | 3     | 0.999   | 1,165,683 164,166     |
|        |              |              |                                                            |       |                      | ILASTADSKHTFSPVIK                | 3     | 0.999   |                       |
| F1MJB0 | F1MJB0_BOVIN | Bt.25809     | Uncharacterized protein (Fragment)                         | 0.999 |                      |                                  | 3     | 0.999   | 370,517 65,358        |
|        |              |              |                                                            |       |                      | ATRLNENLQTTTKFHQNETIMAK          | 3     | 0.999   |                       |
| F1MJB5 | F1MJB5_BOVIN | LOC100336630 | Uncharacterized protein (Fragment)                         | 0.999 |                      |                                  | 3     | 0.999   | 4,660,000 907,366     |
|        |              |              |                                                            |       |                      | SESHHGQADSHRQRESVHGDGSGGTSRHR    | 3     | 0.999   |                       |
| F1MJC9 | F1MJC9_BOVIN | Bt.64977     | Uncharacterized protein (Fragment)                         | 0.999 |                      |                                  | 3     | 0.999   | 1,943,744 191,896     |
| QOIM5  | QOIM5_BOVIN  | SLCO2B1      | Solute carrier organic anion transporter family, member 2B | 0.999 |                      |                                  | 3     | 0.999   | 1,943,744 191,896     |
|        |              |              |                                                            |       |                      | DAKAMVGTEDETPGSKASPQK            | 3     | 0.999   |                       |
| F1MJE5 | F1MJE5_BOVIN | LOC100297996 | Uncharacterized protein                                    | 0.999 |                      |                                  | 3     | 0.999   | 6,922,050 1,053,582   |
|        |              |              |                                                            |       |                      | YVAICDPLHYITMSRR                 | 3     | 0.999   |                       |
| Q3SX14 | GELS_BOVIN   | GSN          | Gelsolin                                                   | 1.000 |                      |                                  | 3     |         | 2,153,915 197,812     |
| F1MJH1 | F1MJH1_BOVIN | GSN          | Uncharacterized protein                                    | 1.000 |                      |                                  | 3     |         | 2,153,915 197,812     |
| F1N16  | F1N16_BOVIN  | GSN          | Uncharacterized protein                                    | 1.000 |                      |                                  | 3     |         | 2,153,915 197,812     |
|        |              |              |                                                            |       |                      | AGALNSNDAFVLK                    | 2     | 0.999   |                       |
|        |              |              |                                                            |       |                      | HVVNPEVTVQR                      | 2     | 0.985   |                       |
|        |              |              |                                                            |       |                      | TGALELLR                         | 2     | 0.915   |                       |
| F1MJ3  | F1MJ3_BOVIN  | Bt.43031     | Uncharacterized protein                                    | 0.999 |                      |                                  | 3     | 0.999   | 6,076,746 1,270,538   |
|        |              |              |                                                            |       |                      | PALSARLAGAQLRPPPMR               | 3     | 0.999   |                       |
| F1MJ0  | F1MJ0_BOVIN  | DNAH9        | Uncharacterized protein                                    | 1.000 |                      |                                  | 3     | 0.882   | 12,929,106 1,213,762  |
|        |              |              |                                                            |       |                      | EYRQLVANLELATWYNNVKM             | 3     | 0.999   |                       |
|        |              |              |                                                            |       |                      | PGPGLAVRGLDAGPEAGPPRAK           | 3     | 0.999   |                       |
| F1MJK2 | F1MJK2_BOVIN | Bt.62664     | Uncharacterized protein (Fragment)                         | 0.999 |                      |                                  | 3     | 0.999   | 5,708,960 1,283,844   |
| G3MXV5 | G3MXV5_BOVIN | Bt.62664     | Uncharacterized protein (Fragment)                         | 0.999 |                      |                                  | 3     | 0.999   | 5,708,960 1,283,844   |
|        |              |              |                                                            |       |                      | HLRRLSTPNNVHVSSSR                | 3     | 0.999   |                       |
|        |              |              |                                                            |       |                      | RSKEGCTSENPHALVSPFK              | 3     | 0.999   |                       |
| F1MJL2 | F1MJL2_BOVIN |              | Uncharacterized protein                                    | 0.999 |                      |                                  | 3     | 0.999   | 2,169,883 232,037     |
|        |              |              |                                                            |       |                      | IQLLEVPNIMSSPKGDPKPK             | 3     | 0.999   |                       |
| F1MJN1 | F1MJN1_BOVIN | ZNF318       | Uncharacterized protein (Fragment)                         | 0.999 |                      |                                  | 3     | 0.999   | 2,342,377 251,177     |
| F1MJN7 | F1MJN7_BOVIN | ZNF318       | Uncharacterized protein (Fragment)                         | 0.999 |                      |                                  | 3     | 0.999   | 2,342,377 251,177     |
|        |              |              |                                                            |       |                      | SPEKVSSSSNSSNCKESK               | 3     | 0.999   |                       |
| Q95135 | EAA3_BOVIN   | SLC1A1       | Excitatory amino acid transporter 3                        | 0.999 |                      |                                  | 3     | 0.999   | 3,655,036 517,259     |
| F1MJN4 | F1MJN4_BOVIN | SLC1A1       | Uncharacterized protein                                    | 0.999 |                      |                                  | 3     | 0.999   | 3,655,036 517,259     |
|        |              |              |                                                            |       |                      | ELEVELSEPGTNSTEATVTAIMTAISKNTK   | 3     | 0.999   |                       |
| F1MJP8 | F1MJP8_BOVIN | Bt.42198     | Uncharacterized protein                                    | 0.999 |                      |                                  | 3     | 0.999   | 2,302,296 372,113     |
|        |              |              |                                                            |       |                      | VPGSQPAGESLRAKYLPSSVATIK         | 3     | 0.999   |                       |
| F1MJQ6 | F1MJQ6_BOVIN | COL5A3       | Uncharacterized protein (Fragment)                         | 0.999 |                      |                                  | 3     | 0.999   | 2,737,196 333,357     |
|        |              |              |                                                            |       |                      | GSKGSPGSGQPRGDAGPPGPPGPPSAELHGLR | 3     | 0.999   |                       |
|        |              |              |                                                            |       |                      | GSPGSGQPRGDAGPPGPPGPPSAELHGLRR   | 3     | 0.999   |                       |
| F1MJU6 | F1MJU6_BOVIN | WSCD1        | Uncharacterized protein                                    | 0.999 |                      |                                  | 3     | 0.999   | 5,219,388 402,745     |
| F1MJV6 | F1MJV6_BOVIN | GPR126       | Uncharacterized protein (Fragment)                         | 0.999 |                      |                                  | 3     | 0.999   | 3,206,633 382,974     |
|        |              |              |                                                            |       |                      | ARVGLPPGRAPRAGPLQALPVAALVGLLDSR  | 3     | 0.999   |                       |
| F1MJW1 | F1MJW1_BOVIN |              | Uncharacterized protein (Fragment)                         | 0.999 |                      |                                  | 3     | 0.999   | 1,584,373 408,119     |
|        |              |              |                                                            |       |                      | VILPQSLDSYQVSVAK                 | 3     | 0.999   |                       |
| F1MJX6 | F1MJX6_BOVIN | HOXA4        | Uncharacterized protein                                    | 0.999 |                      |                                  | 3     | 0.999   | 1,278,617 155,862     |
| G3MXN5 | G3MXN5_BOVIN | HOXA4        | Uncharacterized protein                                    | 0.999 |                      |                                  | 3     | 0.999   | 1,278,617 155,862     |
| F1MJY2 | F1MJY2_BOVIN | RAPGEF1      | Uncharacterized protein (Fragment)                         | 0.999 |                      |                                  | 3     | 0.999   | 2,977,908 309,835     |
|        |              |              |                                                            |       |                      | LTIKQGHSPSTSPVKPSSPAK            | 3     | 0.999   |                       |
| F1MJY3 | F1MJY3_BOVIN | TET3         | Uncharacterized protein (Fragment)                         | 1.000 |                      |                                  | 3     | 0.806   | 10,282,114 1,940,644  |
|        |              |              |                                                            |       |                      | PPNCNDGPECPDYLEWLEGIK            | 3     | 0.806   |                       |
|        |              |              |                                                            |       |                      | PSDPYSVNSVYSHHYAQLAAVNGFHAK      | 3     | 0.999   |                       |
| F1MJY9 | F1MJY9_BOVIN | COL4A6       | Uncharacterized protein (Fragment)                         | 0.999 |                      |                                  | 3     | 0.999   | 10,098,296 1,232,282  |
|        |              |              |                                                            |       |                      | GEKSPGIGAPGKPGIR                 | 3     | 0.999   |                       |
|        |              |              |                                                            |       |                      | GPPGLDGCNGTQAVGFPDPDYSLGPPPLPGQK | 3     | 0.999   |                       |
| F1MK44 | F1MK44_BOVIN | ITGA5        | Uncharacterized protein                                    | 0.999 |                      |                                  | 3     | 0.999   | 2,290,775 240,657     |
|        |              |              |                                                            |       |                      | SLQWFGATVRAHGSSILACAPLYSWRTEK    | 3     | 0.999   |                       |
| F1MK50 | F1MK50_BOVIN | OBP2B        | Uncharacterized protein (Fragment)                         | 0.999 |                      |                                  | 3     | 0.999   | 3,360,313 184,490     |
|        |              |              |                                                            |       |                      | SRMQPTGEPGKYSSNGGK               | 3     | 0.999   |                       |
| F1MK55 | F1MK55_BOVIN | Bt.95461     | Uncharacterized protein                                    | 0.999 |                      |                                  | 3     | 0.999   | 946,513 120,768       |
|        |              |              |                                                            |       |                      | LLAMPSPNLNVLLEQIQIR              | 3     | 0.999   |                       |
| F1MK94 | F1MK94_BOVIN |              | Uncharacterized protein (Fragment)                         | 0.999 |                      |                                  | 3     | 0.999   | 1,350,193 317,221     |
|        |              |              |                                                            |       |                      | LEGPAGGTAAAAGLR                  | 3     | 0.999   |                       |
| F1MK99 | F1MK99_BOVIN | UNC13A       | Uncharacterized protein (Fragment)                         | 0.999 |                      |                                  | 3     | 0.999   | 4,059,235 419,541     |
|        |              |              |                                                            |       |                      | EDRTVGLVALLOLRELVR               | 3     | 0.999   |                       |
|        |              |              |                                                            |       |                      | GSGVEDPVGESVHVHELVFHPGTGEHKVTVK  | 3     | 0.999   |                       |
| F1MKA6 | F1MKA6_BOVIN | LOC100337465 | Uncharacterized protein                                    | 0.999 |                      |                                  | 3     | 0.999   | 27,648,271 2,221,329  |
|        |              |              |                                                            |       |                      | AQVCGGFILHEVVAPER                | 3     | 0.999   |                       |
|        |              |              |                                                            |       |                      | VGDDQLHVDDEAWRLSCMEK             | 3     | 0.999   |                       |
| F1MKE7 | F1MKE7_BOVIN |              | Uncharacterized protein (Fragment)                         | 1.000 |                      |                                  | 3     | 0.999   | 3,849,655 76,449      |
|        |              |              |                                                            |       |                      | AQYEEIQR                         | 2     | 0.973   |                       |
|        |              |              |                                                            |       |                      | NLDDLSIAEVK                      | 2     | 0.999   |                       |
| F1MKE9 | F1MKE9_BOVIN | Bt.27241     | Uncharacterized protein (Fragment)                         | 0.949 |                      |                                  | 3     | 0.804   | 1,537,018 244,995     |
|        |              |              |                                                            |       |                      | FFWEMDEAESWIKKEQIYSSLDYGK        | 3     | 0.804   |                       |
| F1MKH0 | F1MKH0_BOVIN | LSM11        | Uncharacterized protein (Fragment)                         | 0.941 |                      |                                  | 3     | 0.905   | 20,643,909 517,607    |
|        |              |              |                                                            |       |                      | PDAPAPDPERIQR                    | 3     | 0.905   |                       |
| F1MKI1 | F1MKI1_BOVIN | ATP7B        | Uncharacterized protein                                    | 0.999 |                      |                                  | 3     | 0.999   | 1,722,075 140,296     |
|        |              |              |                                                            |       |                      | AIATQVGINKVF AEVLPSHK            | 3     | 0.999   |                       |
| F1MKK3 | F1MKK3_BOVIN | LOC100335569 | Uncharacterized protein (Fragment)                         | 0.999 |                      |                                  | 3     | 0.999   | 16,550,630 804,705    |
| G3MXG8 | G3MXG8_BOVIN | LOC100335569 | Uncharacterized protein (Fragment)                         | 0.999 |                      |                                  | 3     | 0.999   | 16,550,630 804,705    |
|        |              |              |                                                            |       |                      | VPGPAGEEEPEEGER                  | 3     | 0.999   |                       |
| F1MKN2 | F1MKN2_BOVIN | MFG          | Uncharacterized protein (Fragment)                         | 0.999 |                      |                                  | 3     | 0.999   | 1,932,815 150,421     |
| G3N3R9 | G3N3R9_BOVIN | MFG          | Uncharacterized protein (Fragment)                         | 0.999 |                      |                                  | 3     | 0.999   | 1,932,815 150,421     |
|        |              |              |                                                            |       |                      | ELHLGPPATLGPTRISYIFSSPEGR        | 3     | 0.999   |                       |
| P82929 | RT34_BOVIN   | MRPS34       | 28S ribosomal protein S34, mitochondria                    | 0.999 |                      |                                  | 3     | 0.999   | 1,930,402 157,924     |
| F1MKN3 | F1MKN3_BOVIN | MRPS34       | Uncharacterized protein                                    | 0.999 |                      |                                  | 3     | 0.999   | 1,930,402 157,924     |
|        |              |              |                                                            |       |                      | DSRYVALDYETLIRPHSGR              | 3     | 0.999   |                       |
| F1MKQ9 | F1MKQ9_BOVIN | UACA         | Uncharacterized protein                                    | 0.999 |                      |                                  | 3     | 0.999   | 498,300 70,142        |
| F1N101 | F1N101_BOVIN | UACA         | Uncharacterized protein                                    | 0.999 |                      |                                  | 3     | 0.999   | 498,300 70,142        |

|        |              |           |                                                                      |       |                               |   |         |            |            |
|--------|--------------|-----------|----------------------------------------------------------------------|-------|-------------------------------|---|---------|------------|------------|
| Q8HY4  | UACA_BOVIN   | UACA      | Uveal autoantigen with coiled-coil domains and ankyrin repeats prote | 0.999 | 1.9                           |   | 498,300 | 70,142     |            |
| F1MK9  | F1MK9_BOVIN  | TYW5      | Uncharacterized protein                                              | 0.999 | VNGLQLQNEEVMADLESEKEK         | 3 | 0.999   | 15,703,196 | 11,321,118 |
| F1MK7  | F1MK7_BOVIN  | DIP2C     | Uncharacterized protein (Fragment)                                   | 0.999 | TLGELPEEYRDFYARR              | 3 | 0.999   | 462,502    | 81,884     |
| F1MKU4 | F1MKU4_BOVIN | Bt.40485  | Uncharacterized protein                                              | 0.999 | IALTQSFSLFK                   | 3 | 0.999   | 17,543,827 | 3,637,482  |
| Q29RP1 | UBP1_BOVIN   | USP1      | Ubiquitin carboxy-terminal hydrolase                                 | 0.999 | 1.5                           |   |         | 17,543,827 | 3,637,482  |
| F1MKV4 | F1MKV4_BOVIN |           | Uncharacterized protein (Fragment)                                   | 0.999 | 0.7                           |   |         | 1,448,600  | 88,884     |
| F1MY14 | F1MY14_BOVIN |           | Uncharacterized protein (Fragment)                                   | 0.999 | 0.7                           |   |         | 1,448,600  | 88,884     |
| F1MKW3 | F1MKW3_BOVIN | Bt.62820  | Uncharacterized protein (Fragment)                                   | 0.999 | 3.0                           |   |         | 1,930,527  | 238,910    |
| F1MKX7 | F1MKX7_BOVIN | XRN2      | Uncharacterized protein                                              | 0.999 | CHPDEVMSIKTTNR                | 3 | 0.999   | 3,324,300  | 266,809    |
| F1MKX9 | F1MKX9_BOVIN | EYA1      | Uncharacterized protein                                              | 0.999 | YPLPPPSGRYSWN                 | 3 | 0.999   | 2,260,457  | 514,523    |
| F1MKY0 | F1MKY0_BOVIN | BL1248    | Uncharacterized protein (Fragment)                                   | 0.999 | 4.1                           |   |         | 894,483    | 159,443    |
| F1MKY4 | F1MKY4_BOVIN | Bt.26352  | Uncharacterized protein                                              | 0.999 | AEIEALDQSWLTALKALTLHSR        | 3 | 0.999   | 1,087,146  | 220,384    |
| G3MXR1 | G3MXR1_BOVIN | Bt.26352  | Uncharacterized protein                                              | 0.999 | 4.7                           |   |         | 1,087,146  | 220,384    |
| F1ML16 | F1ML16_BOVIN | HIC1      | Uncharacterized protein (Fragment)                                   | 0.999 | VTFGNTDSSVDGIPVSRVFNPTGCVK    | 3 | 0.999   | 3,861,096  | 689,303    |
| F1ML17 | F1ML17_BOVIN | NFAM1     | Uncharacterized protein (Fragment)                                   | 0.913 | 1.6                           |   |         | 6,798,604  | 1,112,962  |
| F1ML48 | F1ML48_BOVIN | MORC4     | Uncharacterized protein                                              | 0.999 | 3.2                           |   |         | 3,339,425  | 584,949    |
| F1ML49 | F1ML49_BOVIN | LOC784489 | Uncharacterized protein (Fragment)                                   | 0.999 | AEAEDEPQEQIHQVDDDKDVNK        | 3 | 0.999   | 1,266,686  | 146,938    |
| F1ML50 | F1ML50_BOVIN | SLC35E1   | Uncharacterized protein                                              | 0.999 | 2.4                           |   |         | 7,682,602  | 1,030,408  |
|        |              |           |                                                                      |       | 4.4                           |   |         |            |            |
|        |              |           |                                                                      |       | 7.8                           |   |         |            |            |
|        |              |           |                                                                      |       | 14.6                          |   |         |            |            |
| F1ML73 | F1ML73_BOVIN | Bt.48025  | Uncharacterized protein                                              | 0.999 | AWRVPPAPPVSGPGPHQSSGPLLPRFYPR | 3 | 0.999   | 737,968    | 242,323    |
| F1ML79 | F1ML79_BOVIN | ZCCHC9    | Uncharacterized protein                                              | 0.999 | VPPAPPVSGPGPHQSSGPLLPR        | 3 | 0.999   | 4,361,017  | 362,002    |
| F1ML89 | F1ML89_BOVIN | CPS1      | Uncharacterized protein                                              | 0.999 | 14.6                          |   |         | 12,161,262 | 1,895,828  |
| F1ML91 | F1ML91_BOVIN | CRLF1     | Uncharacterized protein (Fragment)                                   | 0.999 | NQHYRLTFCFISWSPCYDCAQLTTLFK   | 3 | 0.999   | 9,164,692  | 412,007    |
| F1MLA7 | F1MLA7_BOVIN |           | Uncharacterized protein                                              | 0.999 | 0.4                           |   |         | 863,647    | 96,150     |
| F1N0T9 | F1N0T9_BOVIN | Bt.4812   | Uncharacterized protein (Fragment)                                   | 0.999 | 0.4                           |   |         | 863,647    | 96,150     |
| P98167 | SSPO_BOVIN   | SSPO      | SCO-spondin                                                          | 0.999 | 0.4                           |   |         | 863,647    | 96,150     |
| F1MLB1 | F1MLB1_BOVIN | Bt.84314  | Uncharacterized protein                                              | 0.999 | GRVAGLGDGFDGASNDLR            | 3 | 0.999   | 17,730,421 | 1,991,485  |
|        |              |           |                                                                      |       | 1.2                           |   |         |            |            |
|        |              |           |                                                                      |       | 0.6                           |   |         | 758,961    | 68,684     |
| F1N734 | F1N734_BOVIN | Bt.32593  | Uncharacterized protein (Fragment)                                   | 0.999 | 0.8                           |   |         | 758,961    | 68,684     |
| F1MLD1 | F1MLD1_BOVIN | Bt.68184  | Uncharacterized protein (Fragment)                                   | 0.999 | 0.8                           |   |         | 758,961    | 68,684     |
| F1N1M3 | F1N1M3_BOVIN | Bt.68184  | Uncharacterized protein (Fragment)                                   | 0.999 | 0.8                           |   |         | 758,961    | 68,684     |
| Q08DV9 | T131L_BOVIN  |           | Transmembrane protein 131-like                                       | 0.999 | 1.3                           |   |         | 2,487,022  | 293,010    |
| F1MLE9 | F1MLE9_BOVIN | Bt.21222  | Uncharacterized protein                                              | 0.999 | 1.4                           |   |         | 2,487,022  | 293,010    |
| G5E899 | G5E899_BOVIN | Bt.21222  | Uncharacterized protein (Fragment)                                   | 0.999 | 1.4                           |   |         | 2,487,022  | 293,010    |
| F1MLF8 | F1MLF8_BOVIN | HGD       | Uncharacterized protein                                              | 1.000 | DVLSLOFEPVLLPTSTTNFTK         | 3 | 0.999   | 1,838,992  | 130,824    |
|        |              |           |                                                                      |       | 7.2                           |   |         |            |            |
|        |              |           |                                                                      |       | 3.2                           |   |         | 1,585,815  | 145,587    |
| F1MLI8 | F1MLI8_BOVIN | PODXL     | Uncharacterized protein (Fragment)                                   | 0.999 | DMQFGGQGPPEMEDR               | 3 | 0.999   | 4,169,992  | 564,436    |
| F1MLJ1 | F1MLJ1_BOVIN | PCDHB1    | Uncharacterized protein                                              | 1.000 | 7.6                           |   |         |            |            |
|        |              |           |                                                                      |       | 6.4                           |   |         | 2,517,592  | 246,959    |
| F1MLK9 | F1MLK9_BOVIN | HSCB      | Uncharacterized protein                                              | 1.000 | CWNGCGPGGPPRGDR               | 3 | 0.999   | 4,049,167  | 346,778    |
| F1MLL2 | F1MLL2_BOVIN | STK32C    | Uncharacterized protein (Fragment)                                   | 0.999 | 7.7                           |   |         | 1,512,723  | 157,694    |
| F1MLR3 | F1MLR3_BOVIN | ASTN1     | Uncharacterized protein (Fragment)                                   | 0.999 | 1.1                           |   |         | 2,815,617  | 876,765    |
| F1MLR6 | F1MLR6_BOVIN | Bt.92694  | Uncharacterized protein                                              | 0.999 | 1.7                           |   |         | 2,815,617  | 876,765    |
| F1N7F9 | F1N7F9_BOVIN | CACNA2D1  | Uncharacterized protein (Fragment)                                   | 0.999 | 2.0                           |   |         | 3,086,275  | 260,387    |
| F1MLR9 | F1MLR9_BOVIN | MYO7B     | Uncharacterized protein (Fragment)                                   | 0.999 | 1.1                           |   |         | 2,046,037  | 183,532    |
| F1MLS2 | F1MLS2_BOVIN | TRIO      | Uncharacterized protein (Fragment)                                   | 0.963 | 0.5                           |   |         | 2,127,462  | 237,811    |
| F1MLS5 | F1MLS5_BOVIN | LOC790530 | Uncharacterized protein (Fragment)                                   | 0.999 | DTEPIPKMKVLESPPR              | 3 | 0.826   | 898,069    | 127,659    |
| Q2YDM3 | M4A13_BOVIN  | MS4A13    | Membrane-spanning 4-domains subfamily A member 11                    | 0.999 | IYFVDHNRITQFTDPR              | 3 | 0.999   | 898,069    | 127,659    |
| F1MLS7 | F1MLS7_BOVIN | MS4A13    | Uncharacterized protein                                              | 0.999 | 18.3                          |   |         | 977,217    | 207,019    |
| F1MLT2 | F1MLT2_BOVIN | ZBT841    | Uncharacterized protein (Fragment)                                   | 0.999 | 3.5                           |   |         | 977,217    | 207,019    |
| G3N3J7 | G3N3J7_BOVIN | ZBT841    | Uncharacterized protein (Fragment)                                   | 0.999 | 3.6                           |   |         | 1,386,078  | 217,572    |
| F1MLT6 | F1MLT6_BOVIN | WDR27     | Uncharacterized protein                                              | 0.999 | 3.7                           |   |         | 10,276,883 | 1,129,283  |
| F1MLU4 | F1MLU4_BOVIN | Bt.59479  | Uncharacterized protein                                              | 0.999 | TLEVFDLNVCESAIVTGAHSRPHQICQNK | 3 | 0.999   | 2,295,138  | 245,172    |
| O02811 | PI4KA_BOVIN  | PI4KA     | Phosphatidylinositol 4-kinase alpha                                  | 0.999 | 2.1                           |   |         | 2,295,138  | 245,172    |
| F1MLV0 | F1MLV0_BOVIN | PI4KA     | Uncharacterized protein                                              | 0.999 | 2.1                           |   |         | 2,295,138  | 245,172    |
| F1MLW0 | F1MLW0_BOVIN | CALD1     | Uncharacterized protein                                              | 0.999 | SFFPDAILFYIPIQVQALRYDKMGYVR   | 3 | 0.999   | 668,568    | 131,833    |
| F1MLX8 | F1MLX8_BOVIN |           | Uncharacterized protein (Fragment)                                   | 1.000 | 2.5                           |   |         | 3,354,708  | 309,620    |
| F1MLY5 | F1MLY5_BOVIN | Bt.45378  | Uncharacterized protein                                              | 0.999 | 2.8                           |   |         | 7,948,252  | 553,902    |
| F1MLY7 | F1MLY7_BOVIN | Bt.24783  | Uncharacterized protein (Fragment)                                   | 0.999 | HSSGGGGGGGGGGGGGGGGSSSFIAGRR  | 3 | 0.999   | 3,783,808  | 483,740    |
| F1MLZ5 | F1MLZ5_BOVIN | DENND3    | Uncharacterized protein (Fragment)                                   | 0.999 | 0.7                           |   |         | 1,374,274  | 191,692    |
| F1MLZ9 | F1MLZ9_BOVIN | GRIN2A    | Uncharacterized protein (Fragment)                                   | 0.999 | 1.0                           |   |         | 4,775,767  | 354,111    |
| F1MM00 | F1MM00_BOVIN | Bt.62434  | Uncharacterized protein (Fragment)                                   | 0.999 | 1.5                           |   |         | 8,600,546  | 606,219    |
| F1MM03 | F1MM03_BOVIN | NCAM2     | Uncharacterized protein (Fragment)                                   | 0.999 | 2.2                           |   |         | 684,421    | 271,966    |
| F1MM15 | F1MM15_BOVIN | RGS3      | Uncharacterized protein (Fragment)                                   | 1.000 | 2.3                           |   |         | 7,662,744  | 746,219    |
|        |              |           |                                                                      |       | 4.2                           |   |         |            |            |
|        |              |           |                                                                      |       | 2.6                           |   |         | 2,285,081  | 444,676    |
| F1MM16 | F1MM16_BOVIN | Bt.33617  | Uncharacterized protein (Fragment)                                   | 0.999 | 2.6                           |   |         | 3,262,175  | 399,665    |
| F1MM66 | F1MM66_BOVIN | Bt.44381  | Uncharacterized protein                                              | 0.999 | 4.3                           |   |         | 2,537,662  | 173,773    |
| F1MM78 | F1MM78_BOVIN | Bt.13990  | Uncharacterized protein                                              | 0.999 | 2.0                           |   |         | 1,133,361  | 96,976     |
| Q29RU4 | CO6_BOVIN    | C6        | Complement component C6                                              | 0.999 | 2.4                           |   |         | 1,133,361  | 96,976     |
| F1MM86 | F1MM86_BOVIN | C6        | Uncharacterized protein                                              | 0.999 | 2.4                           |   |         | 932,043    | 96,225     |
| Q865V0 | CEP57_BOVIN  | CEP57     | Centrosomal protein of 57 kDa                                        | 0.999 | 2.8                           |   |         | 932,043    | 96,225     |
| F1MM87 | F1MM87_BOVIN | CEP57     | Uncharacterized protein                                              | 0.999 | 2.8                           |   |         | 932,043    | 96,225     |



|           |              |           |                                             |       |                                |   |       |            |           |
|-----------|--------------|-----------|---------------------------------------------|-------|--------------------------------|---|-------|------------|-----------|
|           |              |           |                                             |       | VSSIIPLAKQVSSR                 | 3 | 0.999 |            |           |
| F1MM93    | F1MM93_BOVIN | FGD2      | Uncharacterized protein                     | 0.999 | 3.8                            |   |       | 2,581,218  | 766,457   |
| F1MM99    | F1MM99_BOVIN | TSC1      | Uncharacterized protein                     | 0.999 | NFERAIELLATWTDKSPPFQEVITR      | 3 | 0.999 | 819,077    | 111,367   |
| F1MMB3    | F1MMB3_BOVIN | Bt.74407  | Nucleoside diphosphate kinase (Fragment)    | 0.999 | 2.6                            |   |       |            |           |
| F1N6T4    | F1N6T4_BOVIN | Bt.74407  | Uncharacterized protein                     | 0.999 | CLKMDDTVLVTITGLVLTITMLPMIPQSGK | 3 | 0.999 | 806,853    | 136,439   |
| F1MMD4    | F1MMD4_BOVIN | MMP11     | Uncharacterized protein (Fragment)          | 0.999 | 13.0                           |   |       | 806,853    | 136,439   |
| F1MMD7    | F1MMD7_BOVIN | Bt.5945   | Uncharacterized protein                     | 1.000 | 10.2                           |   |       |            |           |
| Q3T052    | ITI14_BOVIN  | ITI14     | Inter-alpha-trypsin inhibitor heavy chain H | 1.000 | GLLCGARALGPSLLARSCSGGSPWTR     | 3 | 0.999 | 1,027,762  | 169,787   |
|           |              |           |                                             |       | 5.5                            |   |       |            |           |
|           |              |           |                                             |       | QTVAELQVWSDVTLPTFTFVHEGR       | 3 | 0.999 | 16,847,795 | 1,395,508 |
|           |              |           |                                             |       | 22.9                           |   |       | 16,847,795 | 1,395,508 |
|           |              |           |                                             |       | 22.9                           |   |       |            |           |
|           |              |           |                                             |       | AAAGQEQYSAAVAR                 | 2 | 1.000 |            |           |
|           |              |           |                                             |       | EATFOMELPK                     | 2 | 0.875 |            |           |
|           |              |           |                                             |       | ELKLDYQESPPGK                  | 2 | 0.989 |            |           |
|           |              |           |                                             |       | EQSPDVLQAIR                    | 2 | 1.000 |            |           |
|           |              |           |                                             |       | FAHTVITSR                      | 2 | 0.989 |            |           |
|           |              |           |                                             |       | FKPTLSQQQK                     | 2 | 0.983 |            |           |
|           |              |           |                                             |       | FSSHVSGTLGQFYQDVLWGLDADDSCR    | 3 | 1.000 |            |           |
|           |              |           |                                             |       | GSELVWAGK                      | 1 | 0.976 |            |           |
|           |              |           |                                             |       | GSELVWAGK                      | 2 | 1.000 |            |           |
|           |              |           |                                             |       | HLGAYELLK                      | 2 | 1.000 |            |           |
|           |              |           |                                             |       | KTEGQFQVSVVAPAAK               | 2 | 1.000 |            |           |
|           |              |           |                                             |       | LDYQESPPGK                     | 2 | 1.000 |            |           |
|           |              |           |                                             |       | LREQSPDVLQAIR                  | 3 | 0.991 |            |           |
|           |              |           |                                             |       | SYATGIAQGGTNNIDAMLMAVOLLEK     | 2 | 1.000 |            |           |
|           |              |           |                                             |       | VONDDIYSLTVDSK                 | 2 | 1.000 |            |           |
|           |              |           |                                             |       | VTFELVYELLAR                   | 2 | 1.000 |            |           |
|           |              |           |                                             |       | VTIGLLFDWGGPK                  | 2 | 1.000 |            |           |
|           |              |           |                                             |       | YIFHSFIER                      | 2 | 0.992 |            |           |
| F1MTU2    | F1MTU2_BOVIN | Bt.652    | Uncharacterized protein (Fragment)          | 0.999 | 2.8                            |   |       | 842,397    | 126,724   |
| F1MME0    | F1MME0_BOVIN | TAF2      | Uncharacterized protein                     | 0.999 | 2.3                            |   |       | 842,397    | 126,724   |
| F1MME1    | F1MME1_BOVIN | Bt.7319   | Uncharacterized protein                     | 0.999 | SYAEYGHFVDIRIAALEAVVDYTKVDR    | 3 | 0.999 |            |           |
| F1MQ80    | F1MQ80_BOVIN | PTPRK     | Uncharacterized protein (Fragment)          | 0.999 | 1.3                            |   |       | 1,628,779  | 155,888   |
| F1MME6    | F1MME6_BOVIN | MYOM1     | Uncharacterized protein                     | 0.999 | 1.7                            |   |       | 1,628,779  | 155,888   |
| F1MN18    | F1MN18_BOVIN | Bt.43180  | Uncharacterized protein (Fragment)          | 0.999 | 2.2                            |   |       | 666,982    | 81,011    |
| O62703    | CTBL1_BOVIN  | CTNBL1    | Beta-catenin-like protein 1                 | 0.999 | 2.1                            |   |       | 666,982    | 81,011    |
| F1MMG3    | F1MMG3_BOVIN | CTNBL1    | Uncharacterized protein                     | 0.999 | 2.1                            |   |       | 666,982    | 81,011    |
| F1MMK8    | F1MMK8_BOVIN | KARS      | Lysyl-tRNA synthetase                       | 0.999 | GSSKIVRHIK                     | 3 | 0.999 | 4,724,664  | 1,251,990 |
| P00978    | AMBIP_BOVIN  | AMBIP     | Protein AMBP                                | 1.000 | 4.7                            |   |       |            |           |
| F1MMK9    | F1MMK9_BOVIN | AMBIP     | Uncharacterized protein                     | 1.000 | KGELSIPIYEITLLSPCLHMLPHLHFLGK  | 3 | 0.999 | 5,442,400  | 291,434   |
|           |              |           |                                             |       | 19.3                           |   |       | 5,442,400  | 291,434   |
|           |              |           |                                             |       | 19.3                           |   |       |            |           |
|           |              |           |                                             |       | EYCGIPGAEDELLR                 | 2 | 0.999 |            |           |
|           |              |           |                                             |       | GVCEISGTYEK                    | 2 | 0.988 |            |           |
|           |              |           |                                             |       | SYIQLWAFDAVK                   | 2 | 1.000 |            |           |
|           |              |           |                                             |       | TVEACNLPIVQGPCR                | 2 | 1.000 |            |           |
|           |              |           |                                             |       | WFNVAVGSTCPWLK                 | 2 | 1.000 |            |           |
| F1MML3    | F1MML3_BOVIN | BCORL1    | Uncharacterized protein                     | 0.999 | 1.2                            |   |       | 2,273,888  | 287,132   |
| F1MML4    | F1MML4_BOVIN | Bt.36980  | Uncharacterized protein (Fragment)          | 0.999 | QMWDTEEEEEDEEGLVKRK            | 3 | 0.999 | 1,096,528  | 185,559   |
| F1MMM6    | F1MMM6_BOVIN | SLT13     | Uncharacterized protein (Fragment)          | 0.999 | 7.9                            |   |       |            |           |
| Q2HJ10    | RM19_BOVIN   | MRPL19    | 39S ribosomal protein L19, mitochondria     | 0.999 | QVOPHPDNGAGRSPTYLIDMLNKMMAK    | 3 | 0.999 | 1,067,532  | 259,597   |
| F1MMM8    | F1MMM8_BOVIN | MRPL19    | Uncharacterized protein                     | 0.999 | 2.4                            |   |       | 4,656,211  | 852,528   |
| F1MRL9    | F1MRL9_BOVIN | ZNF260    | Uncharacterized protein (Fragment)          | 0.999 | 4.5                            |   |       | 4,656,211  | 852,528   |
| F1N259    | F1N259_BOVIN | ZNF260    | Uncharacterized protein (Fragment)          | 0.999 | 4.5                            |   |       | 4,656,211  | 852,528   |
| F1MMM9    | F1MMM9_BOVIN | ZNF529    | Uncharacterized protein                     | 0.999 | GCOAAKGLGPSFR                  | 3 | 0.999 | 1,342,515  | 180,152   |
| F1MMN5    | F1MMN5_BOVIN | Bt.5273   | Uncharacterized protein                     | 0.999 | 2.2                            |   |       | 1,342,515  | 180,152   |
| F1N1A9    | F1N1A9_BOVIN | Bt.5273   | Uncharacterized protein                     | 0.999 | 2.3                            |   |       | 1,342,515  | 180,152   |
| P80746    | ITAV_BOVIN   | ITGAV     | Integrin alpha-V                            | 0.999 | 2.8                            |   |       | 1,174,378  | 136,908   |
| F1MMN9    | F1MMN9_BOVIN | AVIL      | Uncharacterized protein                     | 0.999 | ECGKAFQVGSSELTRHOR             | 3 | 0.999 | 1,174,378  | 136,908   |
| F1MMP0    | F1MMP0_BOVIN | ARHGAP23  | Uncharacterized protein                     | 0.999 | 3.2                            |   |       | 1,174,378  | 136,908   |
| G3N3K9    | G3N3K9_BOVIN | ARHGAP23  | Uncharacterized protein (Fragment)          | 0.999 | 2.4                            |   |       | 1,174,378  | 136,908   |
| G5E6T2    | G5E6T2_BOVIN | ARHGAP23  | Uncharacterized protein (Fragment)          | 0.999 | 2.4                            |   |       | 1,174,378  | 136,908   |
| F1MMP2    | F1MMP2_BOVIN | WDR65     | Uncharacterized protein                     | 0.999 | SKNIDADGGQFCQGGFSIDFTKADR      | 3 | 0.999 | 5,879,421  | 510,512   |
| Q0VCM5    | ITI14_BOVIN  | ITI14     | Inter-alpha-trypsin inhibitor heavy chain H | 1.000 | 2.6                            |   |       | 7,371,760  | 1,990,901 |
| F1MMP5    | F1MMP5_BOVIN | ITI14     | Uncharacterized protein                     | 1.000 | GYPSSNTVETVNDGAESAMFK          | 3 | 0.999 | 7,371,760  | 1,990,901 |
|           |              |           |                                             |       | 1.0                            |   |       | 7,371,760  | 1,990,901 |
|           |              |           |                                             |       | 0.9                            |   |       | 7,371,760  | 1,990,901 |
|           |              |           |                                             |       | 0.8                            |   |       | 7,371,760  | 1,990,901 |
|           |              |           |                                             |       | SIPEPPPIYPR                    | 3 | 0.999 | 9,867,925  | 3,446,192 |
|           |              |           |                                             |       | 1.3                            |   |       |            |           |
|           |              |           |                                             |       | IKELTDKFLQEMESLK               | 3 | 0.999 | 2,303,211  | 239,257   |
|           |              |           |                                             |       | 7.4                            |   |       | 2,303,211  | 239,257   |
|           |              |           |                                             |       | 7.4                            |   |       |            |           |
|           |              |           |                                             |       | GMTDQDGLPEIHDKPLDDYLPLEMVGPR   | 3 | 1.000 |            |           |
|           |              |           |                                             |       | GSLVQASPNLEAAR                 | 2 | 0.970 |            |           |
|           |              |           |                                             |       | IYEDHDATQQLQGFYEQVANPLLK       | 3 | 1.000 |            |           |
| F1MMQ8    | F1MMQ8_BOVIN | Bt.89351  | Uncharacterized protein (Fragment)          | 0.999 | 0.8                            |   |       | 5,122,983  | 391,532   |
| F1MMT3    | F1MMT3_BOVIN | Bt.55002  | Uncharacterized protein                     | 0.999 | ADKLLKSHPSDAAEQMK              | 3 | 0.999 | 1,413,225  | 185,736   |
| F1MMT4    | F1MMT4_BOVIN | CCDC46    | Uncharacterized protein                     | 0.999 | 0.7                            |   |       | 2,196,676  | 339,663   |
| F1MMU8    | F1MMU8_BOVIN | TMC3      | Uncharacterized protein                     | 0.999 | ELESRVQQLTGEAENSNLQK           | 3 | 0.999 | 6,290,429  | 1,722,049 |
| F1MMU9    | F1MMU9_BOVIN | Bt.41157  | Uncharacterized protein                     | 0.999 | 1.7                            |   |       | 7,860,079  | 403,571   |
| F1MMV5    | F1MMV5_BOVIN | Bt.31987  | Uncharacterized protein                     | 0.999 | 2.5                            |   |       | 1,592,285  | 159,422   |
| Q2KIC0    | NSRP1_BOVIN  | NSRP1     | Nuclear speckle splicing regulatory protein | 0.999 | 2.5                            |   |       | 1,592,285  | 159,422   |
| F1MMY0    | F1MMY0_BOVIN | PTCHD3    | Uncharacterized protein (Fragment)          | 0.999 | MAIPGRQYGLILPK                 | 3 | 0.999 | 636,181    | 88,086    |
| G3N231    | G3N231_BOVIN | PTCHD3    | Uncharacterized protein (Fragment)          | 0.999 | 2.0                            |   |       | 636,181    | 88,086    |
| F1MMY4    | F1MMY4_BOVIN | Bt.37857  | Uncharacterized protein (Fragment)          | 0.914 | 2.7                            |   |       | 5,052,045  | 935,700   |
|           |              |           |                                             |       | 1.1                            |   |       |            |           |
|           |              |           |                                             |       | CGASNCSGFLGDRPK                | 3 | 0.845 |            |           |
| F1MMZ4    | F1MMZ4_BOVIN | Bt.104105 | Uncharacterized protein (Fragment)          | 0.999 | 2.3                            |   |       | 158,609    | 20,706    |
| F1MT47    | F1MT47_BOVIN | Bt.104105 | Uncharacterized protein (Fragment)          | 0.999 | 2.2                            |   |       | 158,609    | 20,706    |
| F1N119    | F1N119_BOVIN | Bt.104105 | Uncharacterized protein (Fragment)          | 0.999 | 2.3                            |   |       | 158,609    | 20,706    |
| Q28146-10 | NRX1A_BOVIN  | NRXN1     | Isoform 10a of Neurexin-1-alpha             | 0.999 | 1.3                            |   |       | 158,609    | 20,706    |
| Q28146-11 | NRX1A_BOVIN  | NRXN1     | Isoform 11a of Neurexin-1-alpha             | 0.999 | 1.3                            |   |       | 158,609    | 20,706    |
| Q28146-12 | NRX1A_BOVIN  | NRXN1     | Isoform 12a of Neurexin-1-alpha             | 0.999 | 1.2                            |   |       | 158,609    | 20,706    |
| Q28146-2  | NRX1A_BOVIN  | NRXN1     | Isoform 2a of Neurexin-1-alpha              | 0.999 | 1.3                            |   |       | 158,609    | 20,706    |
| Q28146-3  | NRX1A_BOVIN  | NRXN1     | Isoform 3a of Neurexin-1-alpha              | 0.999 | 1.3                            |   |       | 158,609    | 20,706    |
| Q28146-4  | NRX1A_BOVIN  | NRXN1     | Isoform 4a of Neurexin-1-alpha              | 0.999 | 1.3                            |   |       | 158,609    | 20,706    |
| Q28146-5  | NRX1A_BOVIN  | NRXN1     | Isoform 5a of Neurexin-1-alpha              | 0.999 | 1.3                            |   |       | 158,609    | 20,706    |
| Q28146-6  | NRX1A_BOVIN  | NRXN1     | Isoform 6a of Neurexin-1-alpha              | 0.999 | 1.3                            |   |       | 158,609    | 20,706    |
| Q28146-7  | NRX1A_BOVIN  | NRXN1     | Isoform 7a of Neurexin-1-alpha              | 0.999 | 1.3                            |   |       | 158,609    | 20,706    |
| Q28146-8  | NRX1A_BOVIN  | NRXN1     | Isoform 8a of Neurexin-1-alpha              | 0.999 | 1.3                            |   |       | 158,609    | 20,706    |
| Q28146-9  | NRX1A_BOVIN  | NRXN1     | Isoform 9a of Neurexin-1-alpha              | 0.999 | 1.3                            |   |       | 158,609    | 20,706    |
| Q28146    | NRX1A_BOVIN  | NRXN1     | Neurexin-1-alpha                            | 0.999 | 1.2                            |   |       | 158,609    | 20,706    |
| F1MN02    | F1MN02_BOVIN | Bt.32446  | Uncharacterized protein (Fragment)          | 0.999 | LTVDQQAMTQMGADHTR              | 3 | 0.999 | 3,545,628  | 904,106   |
| F1MN15    | F1MN15_BOVIN | TATDN2    | Uncharacterized protein (Fragment)          | 0.999 | DVANFLSFFITYNAMCVGLCLRIVGLIK   | 3 | 0.999 | 860,510    | 232,948   |
| F1MN17    | F1MN17_BOVIN | Bt.104458 | Uncharacterized protein                     | 0.999 | 2.3                            |   |       | 836,410    | 94,163    |
| F1MNS0    | F1MNS0_BOVIN | Bt.104458 | Uncharacterized protein                     | 0.999 | 0.6                            |   |       | 836,410    | 94,163    |
| F1MN54    | F1MN54_BOVIN | UMODL1    | Uncharacterized protein (Fragment)          | 0.999 | 0.5                            |   |       | 2,307,758  | 317,143   |
| F1MN60    | F1MN60_BOVIN | ATP2B2    | Uncharacterized protein                     | 0.973 | QSLTSPDSQSARPTNRTALSDPSSR      | 3 | 0.999 | 2,307,758  | 317,143   |
|           |              |           |                                             |       | 1.3                            |   |       |            |           |
|           |              |           |                                             |       | PFSSPDQPLAPTPAPLK              | 3 | 0.999 | 4,001,442  | 687,350   |
|           |              |           |                                             |       | 2.3                            |   |       |            |           |

|        |              |              |                                          |       |                                   |   |       |            |            |
|--------|--------------|--------------|------------------------------------------|-------|-----------------------------------|---|-------|------------|------------|
|        |              |              |                                          |       | LTQKEEPEEELNEDVEIDHAERELR         | 3 | 0.868 |            |            |
| F1MN68 | F1MN68_BOVIN | Bt.85086     | Uncharacterized protein                  | 0.999 | 4.9                               |   |       | 3,593,775  | 300,645    |
| F1MNA1 | F1MNA1_BOVIN | Bt.97665     | Uncharacterized protein                  | 1.000 | HYGVYACDGCSSGFFKRSIR              | 3 | 0.999 | 2,259,550  | 342,721    |
| F1MNA6 | F1MNA6_BOVIN | Bt.44215     | Uncharacterized protein (Fragment)       | 0.999 | DEAQRDRRAAPSSDPEAEGQAESPAEAPVLSR  | 3 | 0.999 | 1,441,562  | 250,444    |
| F1MNA8 | F1MNA8_BOVIN | ZMYM2        | Uncharacterized protein                  | 0.999 | LVECVPNFSEGNNQVEIDAIR             | 3 | 0.999 | 8,188,404  | 878,016    |
| F1MNA9 | F1MNA9_BOVIN | OLFML1       | Uncharacterized protein                  | 0.999 | PHMQSKSCOTDGDWR                   | 3 | 0.858 | 682,284    | 125,284    |
| F1MNA9 | F1MNA9_BOVIN | OLFML1       | Uncharacterized protein                  | 0.999 | SWGQPSILPDGSIFSR                  | 3 | 0.999 | 682,284    | 125,284    |
| F1MN3  | F1MN3_BOVIN  | OLFML1       | Uncharacterized protein                  | 0.999 | 11.2                              |   |       | 682,284    | 125,284    |
| F1MNB1 | F1MNB1_BOVIN | Bt.16529     | Uncharacterized protein                  | 0.999 | TDTDGDSWMDAVSDSPKVVFIGPR          | 3 | 0.999 | 2,428,288  | 826,146    |
| F1MNB7 | F1MNB7_BOVIN | SNX25        | Uncharacterized protein                  | 0.970 | GYWGGPAFLRKLFLHLGK                | 3 | 0.999 | 32,189,275 | 1,027,519  |
| F1MNC0 | F1MNC0_BOVIN | Bt.63212     | Uncharacterized protein                  | 0.999 | DEVDSGGVEVGEAVDEGSSR              | 3 | 0.878 | 2,108,363  | 507,262    |
| F1MND9 | F1MND9_BOVIN | LOC100335480 | Uncharacterized protein                  | 0.999 | HIDSAHAYRNREEQVQAIRSK             | 3 | 0.999 | 1,098,144  | 142,524    |
| F1MNE5 | F1MNE5_BOVIN | FIGNL1       | Uncharacterized protein (Fragment)       | 0.999 | GDRGVVGPPEPKGEQGASGEAGEAGER       | 3 | 0.999 | 1,304,930  | 170,118    |
| Q2K1L1 | CA141_BOVIN  |              | Uncharacterized protein C1orf141 homolog | 0.999 | GIFGKFPVPPKQDGGDPGGGMQYK          | 3 | 0.999 | 680,720    | 163,592    |
| F1MNH1 | F1MNH1_BOVIN | Bt.50351     | Uncharacterized protein                  | 0.999 | 6.7                               |   |       | 680,720    | 163,592    |
| F1MNH3 | F1MNH3_BOVIN | SVEP1        | Uncharacterized protein                  | 0.999 | TVTSTHTGKNDNPIMFHEAGYVQMLLLTK     | 3 | 0.999 | 9,461,078  | 846,445    |
|        |              |              |                                          |       | 1.4                               |   |       |            |            |
|        |              |              |                                          |       | KCLSNSSWSGSPSCLPCK                | 3 | 0.999 |            |            |
|        |              |              |                                          |       | LFPEAAPGAPGRLPEPPAPSEDAAAAESKVER  | 3 | 0.999 |            |            |
| F1MNH7 | F1MNH7_BOVIN | PVRIG        | Uncharacterized protein (Fragment)       | 0.999 | 9.1                               |   |       | 1,416,376  | 349,944    |
| F6PQ64 | F6PQ64_BOVIN | FBXL18       | Uncharacterized protein                  | 0.999 | 3.3                               |   |       | 3,475,472  | 264,571    |
| F6PQR5 | F6PQR5_BOVIN | FBXL18       | Uncharacterized protein                  | 0.999 | 3.2                               |   |       | 3,475,472  | 264,571    |
| F1MNH8 | F1MNH8_BOVIN | FBXL18       | Uncharacterized protein (Fragment)       | 0.999 | 3.3                               |   |       | 3,475,472  | 264,571    |
| F1MNI1 | F1MNI1_BOVIN | CEP164       | Uncharacterized protein                  | 0.999 | TPENLHAFIUSVPGSFAESGATR           | 3 | 0.999 | 6,011,046  | 910,703    |
| F1MNI4 | F1MNI4_BOVIN | APCCDD1      | Uncharacterized protein (Fragment)       | 0.999 | PTSAQWTWDPGLPRLSSSAAQTVDVDFLVEK   | 3 | 0.999 | 3,507,723  | 431,629    |
| F1MNI7 | F1MNI7_BOVIN | Bt.44828     | Uncharacterized protein                  | 0.999 | DTRGRYLLFNGQR                     | 3 | 0.999 | 1,044,202  | 204,961    |
| Q0P5C0 | LMF1_BOVIN   | LMF1         | Lipase maturation factor 1               | 0.999 | 2.5                               |   |       | 1,044,202  | 204,961    |
| F1MNL0 | F1MNL0_BOVIN | Bt.12151     | Uncharacterized protein                  | 0.999 | PGGRHAAEGKWWIR                    | 3 | 0.999 | 2,783,667  | 272,103    |
| F1MNL4 | F1MNL4_BOVIN | LOC100297058 | Uncharacterized protein (Fragment)       | 0.999 | LNEEESVAGQDPWKLKQEER              | 3 | 0.999 | 3,144,497  | 166,931    |
| F1MNM6 | F1MNM6_BOVIN | TMCO7        | Uncharacterized protein                  | 0.999 | VAALTVNGTGPATDMLSATFESDLDETR      | 3 | 0.999 | 8,676,233  | 960,511    |
| F1MNM7 | F1MNM7_BOVIN | Bt.54501     | Uncharacterized protein (Fragment)       | 0.999 | 3.4                               |   |       | 4,160,696  | 425,364    |
| Q3SYU9 | MVP_BOVIN    | MVP          | Major vault protein                      | 0.910 | GILEGAGAAGGSDAEATAADWKK           | 3 | 0.999 | 1,845,596  | 207,186    |
| F1MNN6 | F1MNN6_BOVIN | MVP          | Uncharacterized protein                  | 0.910 | LMRPSGQVAVRGILEGAGAAGGSDAEATAADWK | 3 | 0.999 | 1,845,596  | 207,186    |
| Q2TB10 | LBP_BOVIN    | LBP          | Lipopolysaccharide-binding protein       | 0.999 | 1.7                               |   |       | 2,110,008  | 394,038    |
| F1MNN7 | F1MNN7_BOVIN | LBP          | Uncharacterized protein                  | 0.999 | 2.1                               |   |       | 2,110,008  | 394,038    |
| F1MNT1 | F1MNT1_BOVIN | NUP155       | Uncharacterized protein                  | 0.999 | ELLELEALSTAVESTGTAK               | 3 | 0.880 | 14,559,557 | 12,132,590 |
| F1MNU3 | F1MNU3_BOVIN | RUSC2        | Uncharacterized protein                  | 0.999 | LSVATNVSAMLTFTNSK                 | 3 | 0.999 | 839,325    | 126,715    |
| F1MNV5 | F1MNV5_BOVIN | Bt.4210      | Uncharacterized protein                  | 1.000 | ISNOVDLSSVCAQYR                   | 3 | 0.999 | 15,645,109 | 1,360,832  |
|        |              |              |                                          |       | 15.6                              |   |       |            |            |
|        |              |              |                                          |       | AVDAALTK                          | 1 | 0.944 |            |            |
|        |              |              |                                          |       | DFVQPPTR                          | 2 | 0.840 |            |            |
|        |              |              |                                          |       | LCAGCPKPIVDPDLPEPLSHSIK           | 3 | 0.999 |            |            |
|        |              |              |                                          |       | SPDLEPVLK                         | 2 | 0.990 |            |            |
|        |              |              |                                          |       | VYPTVNCQSLGQTSMLK                 | 2 | 1.000 |            |            |
|        |              |              |                                          |       | VYPTVNCQSLGQTSMLK                 | 3 | 0.976 |            |            |
| F1MNV1 | F1MNV1_BOVIN | PHTF2        | Uncharacterized protein                  | 0.999 | 3.9                               |   |       | 8,776,921  | 434,566    |
| F1MNW4 | F1MNW4_BOVIN | Bt.23843     | Uncharacterized protein                  | 1.000 | SSEDGQSHPEQCETLQPEEATWNTGLTR      | 3 | 0.999 | 61,780,658 | 8,703,610  |
|        |              |              |                                          |       | 19.1                              |   |       |            |            |
|        |              |              |                                          |       | AHIAFKPTVAQR                      | 2 | 1.000 |            |            |
|        |              |              |                                          |       | ALDMEDFK                          | 2 | 0.997 |            |            |
|        |              |              |                                          |       | FYNQVSTPLLK                       | 2 | 1.000 |            |            |
|        |              |              |                                          |       | HLEVDVR                           | 2 | 0.996 |            |            |
|        |              |              |                                          |       | IQPSGGTNINEALLR                   | 2 | 0.996 |            |            |
|        |              |              |                                          |       | TYGNQDTSVQLKK                     | 2 | 1.000 |            |            |
|        |              |              |                                          |       | KFYNQVSTPLLK                      | 2 | 0.998 |            |            |
|        |              |              |                                          |       | NFLVSAIK                          | 1 | 0.955 |            |            |
|        |              |              |                                          |       | SLHVLDTFDFGHDFGVPVSVK             | 2 | 1.000 |            |            |
|        |              |              |                                          |       | SLHVLDTFDFGHDFGVPVSVK             | 3 | 1.000 |            |            |
|        |              |              |                                          |       | TEDHFSVDFNHNVR                    | 2 | 0.978 |            |            |
|        |              |              |                                          |       | TEDHFSVDFNHNVR                    | 3 | 1.000 |            |            |
|        |              |              |                                          |       | TILDDLRTEDHFSVDFNHNVR             | 3 | 1.000 |            |            |
|        |              |              |                                          |       | VANTVIQTK                         | 1 | 0.982 |            |            |
|        |              |              |                                          |       | VANTVIQTK                         | 2 | 1.000 |            |            |
|        |              |              |                                          |       | VGELEVFNGYVYVHFFAPENMDPIPK        | 3 | 1.000 |            |            |
|        |              |              |                                          |       | VOFELHYQEVK                       | 3 | 0.995 |            |            |
|        |              |              |                                          |       | VNHSPOPQNVVFDVQIPK                | 2 | 1.000 |            |            |
|        |              |              |                                          |       | VNHSPOPQNVVFDVQIPK                | 3 | 1.000 |            |            |
| F1MNY2 | F1MNY2_BOVIN | TMEM2        | Uncharacterized protein                  | 0.999 | 1.7                               |   |       | 3,773,942  | 825,333    |
| F1MP31 | F1MP31_BOVIN | GON4L        | Uncharacterized protein                  | 0.999 | ASWTLRLTNRSSGLTFGSYAFK            | 3 | 0.999 | 5,159,688  | 3,790,977  |
| F1MP45 | F1MP45_BOVIN | PTPRE        | Uncharacterized protein (Fragment)       | 0.999 | 0.8                               |   |       | 4,825,859  | 1,106,962  |
| F1MP49 | F1MP49_BOVIN | TRIM24       | Uncharacterized protein                  | 0.999 | TLEDGAKQHNLTAVNVR                 | 3 | 0.999 | 3,409,788  | 449,684    |
| F1MP51 | F1MP51_BOVIN | Bt.99276     | Uncharacterized protein                  | 0.999 | KQDYFIATQGPLAHTVDFWRMWWEWK        | 3 | 0.999 | 1,418,730  | 216,181    |
| F1MPE2 | F1MPE2_BOVIN | DOPEY1       | Uncharacterized protein                  | 0.999 | 2.6                               |   |       | 2,525,711  | 385,356    |
| F1MPG9 | F1MPG9_BOVIN | PLEKHM3      | Uncharacterized protein                  | 0.999 | SPSASSVGSRSRGSSSSKPGADSTHK        | 3 | 0.999 | 658,130    | 131,041    |
| F1MPH3 | F1MPH3_BOVIN | Bt.88019     | Uncharacterized protein                  | 0.999 | 1.5                               |   |       | 1,643,756  | 131,339    |
| P01267 | THYG_BOVIN   | TG           | Thyroglobulin                            | 0.999 | NRTPVWFYMQIAPIR                   | 3 | 0.999 | 1,643,756  | 131,339    |
| F1NSH0 | F1NSH0_BOVIN | Bt.6848      | Uncharacterized protein (Fragment)       | 0.999 | 1.2                               |   |       | 463,034    | 98,952     |
| F1MPH9 | F1MPH9_BOVIN | Bt.69966     | Uncharacterized protein                  | 0.999 | ILSKVQPPLLSASTGGVLOFPSSGQNNNSVK   | 3 | 0.999 | 463,034    | 98,952     |
| Q1LZB6 | CAPR1_BOVIN  | CAPRIN1      | Caprin-1                                 | 0.999 | 4.3                               |   |       | 463,034    | 98,952     |
| F1MPI9 | F1MPI9_BOVIN | ZNF311       | Uncharacterized protein (Fragment)       | 0.999 | AOEWEMLKTAANTARSSEQLQVTLR         | 3 | 0.999 | 2,051,480  | 302,884    |
| F1MPK7 | F1MPK7_BOVIN | SLC15A2      | Uncharacterized protein (Fragment)       | 0.999 | QCWCVDAEGMEVYGTR                  | 3 | 0.999 | 1,601,412  | 284,308    |
| G5E600 | G5E600_BOVIN | Bt.103535    | Uncharacterized protein                  | 0.999 | 3.9                               |   |       | 1,605,158  | 275,638    |
| F1MPM2 | F1MPM2_BOVIN | Bt.37750     | Uncharacterized protein (Fragment)       | 0.999 | EERPAMNPFKNDKSKETFLFVSTEEVPPR     | 3 | 0.999 | 1,605,158  | 275,638    |
| F1MPN4 | F1MPN4_BOVIN |              | Uncharacterized protein (Fragment)       | 0.999 | 1.8                               |   |       | 13,653,500 | 9,742,573  |
| F1MPP3 | F1MPP3_BOVIN | OB-R         | Uncharacterized protein                  | 0.999 | HLDVLSHDHTRNSAEGTEYFK             | 3 | 0.999 | 1,464,321  | 154,273    |
| F1NTE9 | F1NTE9_BOVIN | OB-R         | Uncharacterized protein                  | 0.999 | 12.3                              |   |       | 1,464,321  | 154,273    |
| F1MPQ8 | F1MPQ8_BOVIN | Bt.61182     | Uncharacterized protein (Fragment)       | 0.999 | DVLGPPYKTLLEQVTIAK                | 3 | 0.999 | 1,963,208  | 186,561    |
|        |              |              |                                          |       | 2.0                               |   |       |            |            |
|        |              |              |                                          |       | 1.6                               |   |       |            |            |
|        |              |              |                                          |       | ILNEDSEIKWLRIPSSVK                | 3 | 0.999 |            |            |
|        |              |              |                                          |       | 5.4                               |   |       |            |            |

|          |              |           |                                              |       |                                    |   |       |            |            |
|----------|--------------|-----------|----------------------------------------------|-------|------------------------------------|---|-------|------------|------------|
|          |              |           |                                              |       | SPGWHEADVNIQDVPK                   | 3 | 0.999 |            |            |
| F1MPS0   | F1MPS0_BOVIN | Bt.997    | Uncharacterized protein                      | 0.999 | 1.6                                |   |       | 1,109,284  | 192,605    |
|          |              |           |                                              |       | WHSSRTTGPLSPDRPSPVVR               | 3 | 0.999 |            |            |
| F1MPT4   | F1MPT4_BOVIN | SDK2      | Uncharacterized protein (Fragment)           | 1.000 | 3.0                                |   |       | 10,048,227 | 999,679    |
|          |              |           |                                              |       | NTSVVAGSEVTEMCVANARPLIK            | 3 | 0.999 |            |            |
|          |              |           |                                              |       | TTTWAAGRTSPSLGSGCCFAGSDR           | 3 | 0.999 |            |            |
|          |              |           |                                              |       | YSRADGHGKTLSHVVHDR                 | 3 | 0.828 |            |            |
| F1MPT5   | F1MPT5_BOVIN | DST       | Uncharacterized protein (Fragment)           | 1.000 | 0.6                                |   |       | 3,351,763  | 458,090    |
|          |              |           |                                              |       | RRADPPSSLSQSHIPVLDK                | 3 | 0.999 |            |            |
|          |              |           |                                              |       | TIAEENLLTKTQSGEVALQLQNTIK          | 3 | 0.999 |            |            |
| F1MPU1   | F1MPU1_BOVIN | MED12L    | Uncharacterized protein (Fragment)           | 0.999 | 0.6                                |   |       | 10,738,392 | 4,521,131  |
|          |              |           |                                              |       | MTCAYYSASEAK                       | 3 | 0.999 |            |            |
| F1MPU4   | F1MPU4_BOVIN | MYOT      | Uncharacterized protein                      | 0.999 | 2.2                                |   |       | 5,996,393  | 1,251,078  |
|          |              |           |                                              |       | GFHSLFEVVR                         | 3 | 0.999 |            |            |
| F1MPV6   | F1MPV6_BOVIN | Bt.26663  | Uncharacterized protein (Fragment)           | 0.999 | 1.6                                |   |       | 738,561    | 119,469    |
|          |              |           |                                              |       | SPEDTYRGAKVHVSLDGLCVSPPEGLIR       | 3 | 0.999 |            |            |
| F1MPW0   | F1MPW0_BOVIN | AMBRA1    | Uncharacterized protein                      | 1.000 | 1.9                                |   |       | 12,007,696 | 665,129    |
|          |              |           |                                              |       | RHVSINSARWLPEPGLGLAYGTNK           | 3 | 0.999 |            |            |
| F1MPW8   | F1MPW8_BOVIN | ZFH4      | Uncharacterized protein                      | 1.000 | 0.7                                |   |       | 2,862,558  | 306,281    |
|          |              |           |                                              |       | MTLNEEEKLLSNKCVSAIQGIGK            | 3 | 0.999 |            |            |
| F1MPX2   | F1MPX2_BOVIN | Bt.59111  | Uncharacterized protein                      | 0.999 | 11.0                               |   |       | 7,844,188  | 819,108    |
|          |              |           |                                              |       | FVFGSSAVQALDLDVR                   | 3 | 0.999 |            |            |
| F1MPX8   | F1MPX8_BOVIN | GRIP1     | Uncharacterized protein (Fragment)           | 0.999 | 7.8                                |   |       | 3,532,321  | 399,681    |
| G3MZP1   | G3MZP1_BOVIN | GRIP1     | Uncharacterized protein (Fragment)           | 0.999 | 9.5                                |   |       | 3,532,321  | 399,681    |
|          |              |           |                                              |       | EGNTFGFVIRGGAHDRNK                 | 3 | 0.999 |            |            |
|          |              |           |                                              |       | PGDRLLSVDGIRLLGTTHAEAMSLK          | 3 | 0.999 |            |            |
|          |              |           |                                              |       | VLAINGIPTEDSTFEANQLLRDSSTSK        | 3 | 0.999 |            |            |
| F1MQ21   | F1MQ21_BOVIN | NESTIN    | Uncharacterized protein (Fragment)           | 0.999 | 1.4                                |   |       | 2,739,392  | 354,300    |
|          |              |           |                                              |       | SPASPKWDLPGEQRPSPQGEPR             | 3 | 0.999 |            |            |
| F1MQ24   | F1MQ24_BOVIN | TCP11L1   | Uncharacterized protein                      | 0.999 | 4.7                                |   |       | 4,878,292  | 519,877    |
|          |              |           |                                              |       | SSDSEQGLDPAVEVSDEALQKIK            | 3 | 0.999 |            |            |
| F1MQ36   | F1MQ36_BOVIN | Bt.54851  | Uncharacterized protein                      | 0.999 | 3.8                                |   |       | 3,915,866  | 1,475,871  |
|          |              |           |                                              |       | MQSTVNYLWHTDLLGGGATARYVKAR         | 3 | 0.999 |            |            |
| F1MQ54   | F1MQ54_BOVIN | Bt.540    | Uncharacterized protein (Fragment)           | 0.999 | 2.8                                |   |       | 796,481    | 346,667    |
| Q28156   | PDE5A_BOVIN  | PDE5A     | cGMP-specific 3',5'-cyclic phosphodiesterase | 0.999 | 2.8                                |   |       | 796,481    | 346,667    |
| F1MQ57   | F1MQ57_BOVIN | Bt.53642  | Uncharacterized protein                      | 0.999 | 2.7                                |   |       | 711,519    | 94,136     |
|          |              |           |                                              |       | LDVAEAGSTELEANNCIRLEWNK            | 3 | 0.999 |            |            |
|          |              |           |                                              |       | DYLGKQVLDIDLHAIHFGR                | 3 | 0.999 |            |            |
| F1MQ78   | F1MQ78_BOVIN | ALOX5     | Uncharacterized protein                      | 0.999 | 2.5                                |   |       | 4,600,284  | 310,902    |
|          |              |           |                                              |       | LLVAHVRFITIAINTKAR                 | 3 | 0.999 |            |            |
| F1MQ89   | F1MQ89_BOVIN | COG2      | Uncharacterized protein                      | 0.999 | 3.4                                |   |       | 1,644,148  | 346,285    |
|          |              |           |                                              |       | GNTVPGYDFLVNSVWPEIVRGLEEK          | 3 | 0.999 |            |            |
| F1MQ99   | F1MQ99_BOVIN | Bt.5471   | Uncharacterized protein (Fragment)           | 0.999 | 3.0                                |   |       | 5,696,517  | 580,466    |
|          |              |           |                                              |       | CQAAKVESIAIEGGASRFSAAGGGSR         | 3 | 0.999 |            |            |
| F1MQE1   | F1MQE1_BOVIN | Bt.42573  | Ribosomal protein S6 kinase                  | 0.999 | 2.1                                |   |       | 15,596,534 | 12,755,251 |
|          |              |           |                                              |       | FSLDGEAWEGVSEAK                    | 3 | 0.999 |            |            |
| F1MQH3   | F1MQH3_BOVIN | FERMT1    | Uncharacterized protein                      | 0.999 | 3.1                                |   |       | 7,122,988  | 1,580,621  |
|          |              |           |                                              |       | LIRIDAATGIPITWRFNMK                | 3 | 0.999 |            |            |
| F1MQH5   | F1MQH5_BOVIN | OR4S1     | Uncharacterized protein                      | 0.999 | 8.4                                |   |       | 1,386,230  | 295,421    |
|          |              |           |                                              |       | KALSTCGSHIIVLLVPPMFMYIR            | 3 | 0.999 |            |            |
| F1MQI1   | F1MQI1_BOVIN | Bt.31841  | Uncharacterized protein                      | 0.999 | 0.7                                |   |       | 3,350,533  | 459,707    |
|          |              |           |                                              |       | VDEKTEKVLQEWPLTTVK                 | 3 | 0.999 |            |            |
| F1MQI3   | F1MQI3_BOVIN | NEB       | Uncharacterized protein                      | 0.999 | 1.2                                |   |       | 11,995,054 | 813,469    |
|          |              |           |                                              |       | CMSYYETVLDTPQMQRVR                 | 3 | 0.859 |            |            |
|          |              |           |                                              |       | ENVGKGTPTPTPEMOR                   | 3 | 0.824 |            |            |
|          |              |           |                                              |       | TTVHIMPDPTEVLLAKONQINYSKLYK        | 3 | 0.999 |            |            |
|          |              |           |                                              |       | YRQPAVLKFTSITDTPVILAK              | 3 | 0.999 |            |            |
| F1MQI6   | F1MQI6_BOVIN | TRPM3     | Uncharacterized protein (Fragment)           | 0.946 | 1.2                                |   |       | 3,899,574  | 919,610    |
|          |              |           |                                              |       | ESKAPAAPANTLAIVPDSRR               | 3 | 0.816 |            |            |
| F1MQJ5   | F1MQJ5_BOVIN | Bt.30366  | Uncharacterized protein                      | 0.999 | 2.7                                |   |       | 1,006,154  | 136,847    |
| F1MQK6   | F1MQK6_BOVIN | Bt.30366  | Uncharacterized protein (Fragment)           | 0.999 | 1.3                                |   |       | 1,006,154  | 136,847    |
|          |              |           |                                              |       | TNLELELIHRGGNLCSGGAGTAGK           | 3 | 0.999 |            |            |
| F1MQJ7   | F1MQJ7_BOVIN | PDPK1     | Uncharacterized protein (Fragment)           | 0.999 | 5.4                                |   |       | 1,857,737  | 187,682    |
|          |              |           |                                              |       | QGPAMDGTAAOPRASASALQHAQPPQPRK      | 3 | 0.999 |            |            |
| F1MQK0   | F1MQK0_BOVIN | GIMAP7    | Uncharacterized protein                      | 0.999 | 6.7                                |   |       | 1,480,358  | 185,290    |
|          |              |           |                                              |       | ECGDRCCAISNSGNTGQAQK               | 3 | 0.999 |            |            |
| F1MQS5   | F1MQS5_BOVIN | SPAG16    | Uncharacterized protein (Fragment)           | 0.999 | 10.4                               |   |       | 1,308,689  | 300,351    |
|          |              |           |                                              |       | DGGVDPDVYQNMMLLENENKILK            | 3 | 0.999 |            |            |
| F1MQX0   | F1MQX0_BOVIN | ACSS1     | Uncharacterized protein (Fragment)           | 0.999 | 3.2                                |   |       | 2,645,692  | 216,092    |
|          |              |           |                                              |       | TDNKVHMGHLDVSLQEMAK                | 3 | 0.999 |            |            |
| F1MQX8   | F1MQX8_BOVIN | ALS2CR13  | Uncharacterized protein                      | 0.999 | 6.4                                |   |       | 3,013,500  | 284,272    |
|          |              |           |                                              |       | EEQLIPQDIPDGHRAPPLAQ               | 3 | 0.999 |            |            |
| F1MQY9   | F1MQY9_BOVIN | Bt.2929   | Uncharacterized protein (Fragment)           | 0.999 | 1.6                                |   |       | 5,184,859  | 558,410    |
|          |              |           |                                              |       | LLLPHSPRIHLSQMLNFAEHR              | 3 | 0.999 |            |            |
| F1N5V2   | F1N5V2_BOVIN | TAS1R2    | Uncharacterized protein                      | 0.999 | 3.4                                |   |       | 520,083    | 82,528     |
| F1MQZ1   | F1MQZ1_BOVIN | TAS1R2    | Uncharacterized protein (Fragment)           | 0.999 | 3.7                                |   |       | 520,083    | 82,528     |
| F1MT82   | F1MT82_BOVIN | TAS1R2    | Uncharacterized protein (Fragment)           | 0.999 | 3.5                                |   |       | 520,083    | 82,528     |
|          |              |           |                                              |       | VVYSYSSVYAVAHALHSLGCNQGGR          | 3 | 0.999 |            |            |
| F1MR18   | F1MR18_BOVIN | ZNF883    | Uncharacterized protein                      | 0.999 | 5.7                                |   |       | 474,707    | 125,366    |
|          |              |           |                                              |       | SALLACPGQLDLYLQALQSATLATAPRGLR     | 3 | 0.999 |            |            |
| F1MR22   | F1MR22_BOVIN | PIGR      | Uncharacterized protein                      | 0.999 | 2.6                                |   |       | 655,484    | 87,901     |
|          |              |           |                                              |       | TNQCQFVDSNNYVSDKYK                 | 3 | 0.999 |            |            |
| Q28143-2 | NRX3B_BOVIN  | NRXN3     | isoform 2 of Neurexin-3-beta                 | 0.999 | 4.0                                |   |       | 174,392    | 28,037     |
| Q28143-3 | NRX3B_BOVIN  | NRXN3     | isoform 3 of Neurexin-3-beta                 | 0.999 | 4.3                                |   |       | 174,392    | 28,037     |
| Q28143-4 | NRX3B_BOVIN  | NRXN3     | isoform 4 of Neurexin-3-beta                 | 0.999 | 4.7                                |   |       | 174,392    | 28,037     |
| Q28143   | NRX3B_BOVIN  | NRXN3     | Neurexin-3-beta                              | 0.999 | 3.7                                |   |       | 174,392    | 28,037     |
| F6RU36   | F6RU36_BOVIN | NRXN3     | Uncharacterized protein                      | 0.999 | 4.0                                |   |       | 174,392    | 28,037     |
| G3X794   | G3X794_BOVIN | NRXN3     | Uncharacterized protein                      | 0.999 | 4.7                                |   |       | 174,392    | 28,037     |
| F1MR33   | F1MR33_BOVIN | NRXN3     | Uncharacterized protein (Fragment)           | 0.999 | 12.8                               |   |       | 174,392    | 28,037     |
|          |              |           |                                              |       | GRLFQGLSLGYDGLK                    | 3 | 0.999 |            |            |
| F1MR50   | F1MR50_BOVIN | SLC4A1AP  | Uncharacterized protein (Fragment)           | 0.999 | 4.3                                |   |       | 6,162,195  | 1,488,767  |
|          |              |           |                                              |       | VSGLDAEGDGHGPGFYLYDLGSTHGTFLNKTR   | 3 | 0.999 |            |            |
| F1MR56   | F1MR56_BOVIN | LOC617696 | Uncharacterized protein (Fragment)           | 1.000 | 6.9                                |   |       | 9,389,676  | 624,961    |
|          |              |           |                                              |       | DSSTWLTAFLK                        | 2 | 0.923 |            |            |
|          |              |           |                                              |       | FGLLGEGDK                          | 2 | 0.965 |            |            |
|          |              |           |                                              |       | LEELQFSLGSK                        | 2 | 1.000 |            |            |
|          |              |           |                                              |       | LGQYTSYPAK                         | 2 | 0.988 |            |            |
|          |              |           |                                              |       | LLLPDSLTTWEIHGVSLSK                | 3 | 1.000 |            |            |
|          |              |           |                                              |       | PVGFVSVPIAAVAVSLK                  | 2 | 0.998 |            |            |
|          |              |           |                                              |       | SFFPENLWVK                         | 2 | 0.985 |            |            |
|          |              |           |                                              |       | TLEIPGNSDPNIIPEGDFK                | 2 | 1.000 |            |            |
| F1MR67   | F1MR67_BOVIN |           | Uncharacterized protein                      | 0.999 | 2.3                                |   |       | 1,153,889  | 184,891    |
|          |              |           |                                              |       | LRVFCTSPIGHSQPSDILTVQTPNLSASCR     | 3 | 0.999 |            |            |
| F1MR89   | F1MR89_BOVIN | Bt.35738  | Uncharacterized protein                      | 0.901 | 5.8                                |   |       | 2,708,417  | 542,529    |
|          |              |           |                                              |       | LFECNNGCKAYSSKAHLATHQK             | 3 | 0.901 |            |            |
| F1MRA1   | F1MRA1_BOVIN | PCAF      | Uncharacterized protein (Fragment)           | 0.999 | 1.1                                |   |       | 2,252,317  | 628,712    |
|          |              |           |                                              |       | LKNRYVYVSK                         | 3 | 0.999 |            |            |
| F1MRB6   | F1MRB6_BOVIN | Bt.86779  | Uncharacterized protein (Fragment)           | 0.999 | 4.4                                |   |       | 1,396,250  | 135,231    |
| F1N741   | F1N741_BOVIN | Bt.86779  | Uncharacterized protein (Fragment)           | 0.999 | 4.2                                |   |       | 1,396,250  | 135,231    |
| F1N1Q5   | F1N1Q5_BOVIN | NUP54     | Uncharacterized protein                      | 0.999 | 4.1                                |   |       | 1,396,250  | 135,231    |
|          |              |           |                                              |       | QQQEGLSHLSIIKDDLEIK                | 3 | 0.999 |            |            |
| F1MRB9   | F1MRB9_BOVIN | Bt.25395  | Uncharacterized protein                      | 0.999 | 1.6                                |   |       | 5,138,771  | 1,563,702  |
|          |              |           |                                              |       | DTSEKEDNTPWNEEDSDGEK               | 3 | 0.999 |            |            |
| F1MRF3   | F1MRF3_BOVIN | Bt.66740  | Uncharacterized protein                      | 0.999 | 6.5                                |   |       | 1,734,529  | 215,202    |
| G3MZA8   | G3MZA8_BOVIN | Bt.66740  | Uncharacterized protein                      | 0.999 | 6.5                                |   |       | 1,734,529  | 215,202    |
|          |              |           |                                              |       | YKSTLTHGHCAPVLAFAFSHDQQLMVLVSGVDK  | 3 | 0.999 |            |            |
| F1MRF8   | F1MRF8_BOVIN | LOC790332 | Uncharacterized protein (Fragment)           | 0.999 | 14.7                               |   |       | 2,363,204  | 486,868    |
|          |              |           |                                              |       | PCSLWWVPLNLDAATAHPALFSEEGRR        | 3 | 0.999 |            |            |
| F1MRH9   | F1MRH9_BOVIN |           | Uncharacterized protein (Fragment)           | 0.999 | 3.0                                |   |       | 1,128,789  | 175,370    |
|          |              |           |                                              |       | GORPPDASHAAPLAPGLHILEPQAPGAAPGEGPR | 3 | 0.999 |            |            |
| O97859   | NEUR3_BOVIN  | NEU3      | Sialidase-3                                  | 0.999 | 6.8                                |   |       | 1,141,064  | 228,458    |
| F1MRJ3   | F1MRJ3_BOVIN | NEU3      | Uncharacterized protein                      | 0.999 | 6.8                                |   |       | 1,141,064  | 228,458    |
|          |              |           |                                              |       | LIKPMVTECEVAEVIKAGHPVLYCSAR        | 3 | 0.999 |            |            |
| F1MRJ9   | F1MRJ9_BOVIN |           | Uncharacterized protein (Fragment)           | 0.999 | 1.5                                |   |       | 1,232,377  | 165,507    |
| F1MSA7   | F1MSA7_BOVIN |           | Uncharacterized protein (Fragment)           | 0.999 | 1.5                                |   |       | 1,232,377  | 165,507    |

|          |              |           |                                                                      |       |  |                                  |   |       |            |           |
|----------|--------------|-----------|----------------------------------------------------------------------|-------|--|----------------------------------|---|-------|------------|-----------|
|          |              |           |                                                                      |       |  | YNGESSEYTKMSDNLRCFHR             | 3 | 0.999 |            |           |
| F1MRL4   | F1MRL4_BOVIN | RGAG1     | Uncharacterized protein (Fragment)                                   | 0.999 |  | 1.9                              |   |       | 2,387,858  | 273,712   |
|          |              |           |                                                                      |       |  | STVSGKMPSPGPTQDFGGMSMSFKR        | 3 | 0.999 | 1,863,695  | 534,599   |
| F1MRM9   | F1MRM9_BOVIN | EVIS      | Uncharacterized protein (Fragment)                                   | 0.999 |  | 1.5                              |   |       |            |           |
|          |              |           |                                                                      |       |  | EAEAIMGLKELR                     | 3 | 0.999 |            |           |
| F1MRP8   | F1MRP8_BOVIN | PLEKHG1   | Uncharacterized protein                                              | 0.999 |  | 2.3                              |   |       | 4,259,771  | 666,105   |
|          |              |           |                                                                      |       |  | SQSSSSILINKSADSNINYPGVAKQPVSLHR  | 3 | 0.999 |            |           |
| F1MRS1   | F1MRS1_BOVIN | Bt.42982  | Uncharacterized protein (Fragment)                                   | 0.999 |  | 2.1                              |   |       | 1,293,160  | 110,007   |
|          |              |           |                                                                      |       |  | KACAECFMAVSCATCQEIR              | 3 | 0.999 |            |           |
| F1MRU4   | F1MRU4_BOVIN | Bt.63231  | Uncharacterized protein                                              | 0.999 |  | 1.6                              |   |       | 6,999,012  | 903,145   |
|          |              |           |                                                                      |       |  | FLEDVELDNIIRIOVISMCKYFQESVK      | 3 | 0.999 |            |           |
|          |              |           |                                                                      |       |  | GLAQAGAWACDFENR                  | 3 | 0.999 |            |           |
|          |              |           |                                                                      |       |  | VIQGVLLCPTHLLQDVVKFIR            | 3 | 0.999 |            |           |
| F1MRV0   | F1MRV0_BOVIN | GARNL1    | Uncharacterized protein (Fragment)                                   | 0.999 |  | 2.6                              |   |       | 2,988,233  | 401,776   |
|          |              |           |                                                                      |       |  | LSGFSGSNISNPHITSNSNAELVKKPVYR    | 3 | 0.999 | 6,016,821  | 360,486   |
| F1MRW4   | F1MRW4_BOVIN | KBTBD4    | Uncharacterized protein (Fragment)                                   | 0.999 |  | 2.8                              |   |       |            |           |
|          |              |           |                                                                      |       |  | LVLQAQSCFFRSMFTSNLK              | 3 | 0.999 |            |           |
| F1MS00   | F1MS00_BOVIN | Bt.55314  | Uncharacterized protein                                              | 0.999 |  | 1.1                              |   |       | 2,115,478  | 1,114,881 |
|          |              |           |                                                                      |       |  | MLKENASPSSELR                    | 3 | 0.999 |            |           |
| F1MS10   | F1MS10_BOVIN | Bt.65326  | Uncharacterized protein (Fragment)                                   | 0.999 |  | 2.1                              |   |       | 8,559,799  | 583,725   |
|          |              |           |                                                                      |       |  | LTSQGSVLEDESLLVLSKTKK            | 3 | 0.871 |            |           |
|          |              |           |                                                                      |       |  | MGTTYGPPAGKK                     | 2 | 0.913 |            |           |
|          |              |           |                                                                      |       |  | PLIIEVQGEELDPALDNVLRNFIKGTSTFK   | 3 | 0.999 |            |           |
| F1MS14   | F1MS14_BOVIN | KIAA0947  | Uncharacterized protein                                              | 0.999 |  | 0.9                              |   |       | 678,704    | 116,974   |
|          |              |           |                                                                      |       |  | EPRAPDGTLLSPWIESPK               | 3 | 0.999 |            |           |
| F1MS27   | F1MS27_BOVIN | Bt.45184  | Uncharacterized protein                                              | 0.999 |  | 3.8                              |   |       | 1,269,854  | 724,687   |
| F1NST6   | F1NST6_BOVIN | Bt.56099  | Uncharacterized protein                                              | 0.999 |  | 3.2                              |   |       | 1,269,854  | 724,687   |
|          |              |           |                                                                      |       |  | MVIDIVLATMSKHMNLLADLK            | 3 | 0.999 |            |           |
| F1MS53   | F1MS53_BOVIN | Bt.75453  | Uncharacterized protein                                              | 0.999 |  | 1.7                              |   |       | 2,080,897  | 473,613   |
|          |              |           |                                                                      |       |  | GQKDPATLSTGLPKILGTAEVSGGK        | 3 | 0.999 |            |           |
| F1MS75   | F1MS75_BOVIN | 532707    | Uncharacterized protein (Fragment)                                   | 0.999 |  | 1.8                              |   |       | 2,728,329  | 419,655   |
|          |              |           |                                                                      |       |  | LALAEATIKDNSEEGNGGIR             | 3 | 0.999 |            |           |
| F1MS91   | F1MS91_BOVIN |           | Uncharacterized protein                                              | 0.999 |  | 3.6                              |   |       | 806,177    | 132,129   |
| G3N1W3   | G3N1W3_BOVIN |           | Uncharacterized protein                                              | 0.999 |  | 2.5                              |   |       | 806,177    | 132,129   |
|          |              |           |                                                                      |       |  | EKLYGCSMWWGKAFSQA                | 3 | 0.999 |            |           |
| F1MSA4   | F1MSA4_BOVIN | RAD54B    | Uncharacterized protein                                              | 0.999 |  | 2.8                              |   |       | 1,552,542  | 478,464   |
|          |              |           |                                                                      |       |  | TLOCISLIWTLQCCQPGYGKPIVKK        | 3 | 0.999 |            |           |
| Q3MHF8   | LS14A_BOVIN  | LSM14A    | Protein LSM14 homolog A                                              | 0.999 |  | 2.8                              |   |       | 1,042,355  | 115,014   |
| F1MSA5   | F1MSA5_BOVIN | LSM14A    | Uncharacterized protein                                              | 0.999 |  | 2.8                              |   |       | 1,042,355  | 115,014   |
|          |              |           |                                                                      |       |  | RQIVPGAPSAPRR                    | 3 | 0.999 |            |           |
| F1MSB2   | F1MSB2_BOVIN | Bt.13071  | Uncharacterized protein                                              | 0.999 |  | 0.4                              |   |       | 481,559    | 67,780    |
|          |              |           |                                                                      |       |  | HPFDVGLARR                       | 3 | 0.999 |            |           |
| F1MSB6   | F1MSB6_BOVIN | Bt.65068  | Uncharacterized protein                                              | 0.999 |  | 4.8                              |   |       | 6,100,388  | 1,623,179 |
|          |              |           |                                                                      |       |  | SPPSAKNPVSAQWLVVSDTTRVK          | 3 | 0.999 |            |           |
| Q2KJH5   | K1430_BOVIN  |           | UPF0501 protein KIAA1430 homolog                                     | 0.999 |  | 3.0                              |   |       | 198,044    | 29,829    |
| F1MSC2   | F1MSC2_BOVIN | MGC127461 | Uncharacterized protein                                              | 0.999 |  | 3.0                              |   |       | 198,044    | 29,829    |
|          |              |           |                                                                      |       |  | TDKDTENVNLKGLQR                  | 3 | 0.999 |            |           |
| F1MSC3   | F1MSC3_BOVIN | ACACB     | Uncharacterized protein                                              | 0.999 |  | 0.8                              |   |       | 1,362,463  | 245,285   |
|          |              |           |                                                                      |       |  | DTPLFSEARNLSYEDDSK               | 3 | 0.999 |            |           |
| F1MSD4   | F1MSD4_BOVIN | Bt.25014  | Uncharacterized protein                                              | 0.999 |  | 10.6                             |   |       | 2,816,688  | 512,885   |
| Q2KIB6   | LIN7B_BOVIN  | LIN7B     | Protein lin-7 homolog B                                              | 0.999 |  | 11.0                             |   |       | 2,816,688  | 512,885   |
|          |              |           |                                                                      |       |  | AHATAKATVAFTAEGEHAHPR            | 3 | 0.999 |            |           |
| Q07722   | PLCB4_BOVIN  | PLCB4     | 1-phosphatidylinositol-4,5-bisphosphate phosphodiesterase beta-4 (Fr | 0.999 |  | 2.2                              |   |       | 1,115,117  | 169,933   |
| Q07722-2 | PLCB4_BOVIN  | PLCB4     | Isoform 1A of 1-phosphatidylinositol-4,5-bisphosphate phosphodiester | 0.999 |  | 2.2                              |   |       | 1,115,117  | 169,933   |
| Q07722-3 | PLCB4_BOVIN  | PLCB4     | Isoform 2A of 1-phosphatidylinositol-4,5-bisphosphate phosphodiester | 0.999 |  | 2.4                              |   |       | 1,115,117  | 169,933   |
| Q07722-4 | PLCB4_BOVIN  | PLCB4     | Isoform 2B of 1-phosphatidylinositol-4,5-bisphosphate phosphodiester | 0.999 |  | 2.4                              |   |       | 1,115,117  | 169,933   |
| F1MSD7   | F1MSD7_BOVIN | PLCB4     | Uncharacterized protein                                              | 0.999 |  | 1.8                              |   |       | 1,115,117  | 169,933   |
|          |              |           |                                                                      |       |  | AMGIETSDIADVPDSTSKNDKK           | 3 | 0.999 |            |           |
| F1MSD9   | F1MSD9_BOVIN |           | Uncharacterized protein (Fragment)                                   | 0.999 |  | 3.9                              |   |       | 660,028    | 83,013    |
| G3X7G3   | G3X7G3_BOVIN | ZNF214    | Uncharacterized protein (Fragment)                                   | 0.999 |  | 3.7                              |   |       | 660,028    | 83,013    |
|          |              |           |                                                                      |       |  | LIFDOMAVTFEDVTIVFTWEEWK          | 3 | 0.999 |            |           |
| F1MSE4   | F1MSE4_BOVIN | Bt.53642  | Uncharacterized protein                                              | 0.999 |  | 5.0                              |   |       | 5,048,442  | 421,659   |
|          |              |           |                                                                      |       |  | DLVQDPSSLGGTISAYK                | 3 | 0.999 |            |           |
| F1MSF2   | F1MSF2_BOVIN | Bt.50224  | Uncharacterized protein (Fragment)                                   | 0.999 |  | 5.8                              |   |       | 2,502,232  | 165,785   |
|          |              |           |                                                                      |       |  | LAGLSPLHHSPEIKLDHFSNVQDYLHYMR    | 3 | 0.999 |            |           |
|          |              |           |                                                                      |       |  | VEMESQIYAIPEDIMR                 | 3 | 0.999 |            |           |
| F1MSG6   | F1MSG6_BOVIN | Bt.17143  | Uncharacterized protein                                              | 0.999 |  | 2.8                              |   |       | 1,671,438  | 146,845   |
|          |              |           |                                                                      |       |  | DVSLDASSSMATVATAEAK              | 3 | 0.999 |            |           |
|          |              |           |                                                                      |       |  | PAAMAASHAVTPSAAGLIARK            | 3 | 0.999 |            |           |
| F1MSH1   | F1MSH1_BOVIN | Bt.13071  | Uncharacterized protein (Fragment)                                   | 0.999 |  | 1.5                              |   |       | 2,396,939  | 235,894   |
| F1N1E0   | F1N1E0_BOVIN | CACNA1A   | Uncharacterized protein                                              | 0.999 |  | 1.3                              |   |       | 2,396,939  | 235,894   |
|          |              |           |                                                                      |       |  | HPFDVGLARR                       | 3 | 0.999 |            |           |
|          |              |           |                                                                      |       |  | YPGPVAEPLAGERPPTGGHGSSR          | 3 | 0.999 |            |           |
| F1MSI4   | F1MSI4_BOVIN | Bt.52938  | Uncharacterized protein                                              | 1.000 |  | 8.2                              |   |       | 3,454,937  | 267,293   |
|          |              |           |                                                                      |       |  | CLQDGVGDVSVFR                    | 2 | 0.995 |            |           |
| F1MSK0   | F1MSK0_BOVIN | Bt.92800  | Uncharacterized protein                                              | 0.999 |  | 2.8                              |   |       | 7,850,521  | 637,330   |
|          |              |           |                                                                      |       |  | ERKIPDEDFIILLDGLNEAEFKK          | 3 | 0.999 |            |           |
|          |              |           |                                                                      |       |  | PHPTPRPLLHSQSGLR                 | 3 | 0.999 |            |           |
|          |              |           |                                                                      |       |  | YQSSQGDIVGSQSR                   | 3 | 0.999 |            |           |
| F1MSM3   | F1MSM3_BOVIN | NOTCH1    | Uncharacterized protein                                              | 0.999 |  | 1.0                              |   |       | 2,488,152  | 335,445   |
|          |              |           |                                                                      |       |  | DHACLASPLNGGTCDLLLTLEYK          | 3 | 0.999 |            |           |
| F1MSR4   | F1MSR4_BOVIN | ADAM33    | Uncharacterized protein (Fragment)                                   | 0.999 |  | 4.0                              |   |       | 6,894,779  | 1,155,151 |
|          |              |           |                                                                      |       |  | EVTCRGASMLPGAQLDLDPLGLVEAGTCQGPR | 3 | 0.999 |            |           |
| F1MSS4   | F1MSS4_BOVIN | Bt.26851  | Uncharacterized protein (Fragment)                                   | 0.999 |  | 6.9                              |   |       | 4,303,849  | 1,249,981 |
|          |              |           |                                                                      |       |  | QLKLVLLGLAGPAPPALLAYESR          | 3 | 0.999 |            |           |
| F1MSU3   | F1MSU3_BOVIN | RXFP3     | Uncharacterized protein (Fragment)                                   | 0.999 |  | 4.5                              |   |       | 1,761,650  | 231,682   |
|          |              |           |                                                                      |       |  | VSGTEGASAGGGLAGASAR              | 3 | 0.999 |            |           |
| F1MSW5   | F1MSW5_BOVIN | CENPV     | Uncharacterized protein (Fragment)                                   | 0.999 |  | 19.4                             |   |       | 16,978,113 | 875,648   |
|          |              |           |                                                                      |       |  | EDSSILLSFHEHYQGLVKGHTGGCHGAVR    | 3 | 0.999 |            |           |
| F1MSZ6   | F1MSZ6_BOVIN | SERPINC1  | Uncharacterized protein                                              | 1.000 |  | 25.6                             |   |       | 20,076,677 | 1,362,684 |
|          |              |           |                                                                      |       |  | AFLEVNEEGSEAAASTVSIAGR           | 3 | 0.967 |            |           |
|          |              |           |                                                                      |       |  | DIPVNPICIR                       | 2 | 0.999 |            |           |
|          |              |           |                                                                      |       |  | EQLQDMGLEDLFSPEK                 | 2 | 1.000 |            |           |
|          |              |           |                                                                      |       |  | FDTISEK                          | 2 | 0.881 |            |           |
|          |              |           |                                                                      |       |  | FRIEDSFSVK                       | 2 | 0.993 |            |           |
|          |              |           |                                                                      |       |  | FRIEDSFSVK                       | 3 | 0.997 |            |           |
|          |              |           |                                                                      |       |  | LGACDNLTk                        | 2 | 0.968 |            |           |
|          |              |           |                                                                      |       |  | SDLYVSDAFHK                      | 3 | 0.982 |            |           |
|          |              |           |                                                                      |       |  | SPVEDVCTAKPR                     | 2 | 1.000 |            |           |
|          |              |           |                                                                      |       |  | SPVEDVCTAKPR                     | 3 | 0.998 |            |           |
|          |              |           |                                                                      |       |  | SRLPGIVAAGR                      | 2 | 1.000 |            |           |
|          |              |           |                                                                      |       |  | SSELVSAIR                        | 1 | 0.922 |            |           |
|          |              |           |                                                                      |       |  | SSELVSAIR                        | 2 | 1.000 |            |           |
| F1MT21   | F1MT21_BOVIN |           | Uncharacterized protein (Fragment)                                   | 0.999 |  | 3.9                              |   |       | 2,666,733  | 192,433   |
|          |              |           |                                                                      |       |  | FHLRNLELTGKTYNNGEYK              | 3 | 0.999 |            |           |
| F1MT22   | F1MT22_BOVIN | Bt.94743  | Uncharacterized protein                                              | 0.999 |  | 3.1                              |   |       | 1,541,763  | 297,238   |
|          |              |           |                                                                      |       |  | VIEMPYQCCAFGVCENVYKISNPWSK       | 3 | 0.999 |            |           |
| F1N711   | F1N711_BOVIN | Bt.52756  | Uncharacterized protein (Fragment)                                   | 0.999 |  | 2.6                              |   |       | 1,240,900  | 138,625   |
| F1MT41   | F1MT41_BOVIN | PTGFRN    | Uncharacterized protein (Fragment)                                   | 0.999 |  | 2.6                              |   |       | 1,240,900  | 138,625   |
|          |              |           |                                                                      |       |  | DVFSKPINIFALEDVSVLVAEK           | 3 | 0.999 |            |           |
| F1MT60   | F1MT60_BOVIN | NEB       | Uncharacterized protein                                              | 0.999 |  | 1.0                              |   |       | 2,985,306  | 235,476   |
|          |              |           |                                                                      |       |  | TTVHIMPDPVELLAKQNIYSEKLYK        | 3 | 0.999 |            |           |
|          |              |           |                                                                      |       |  | YRQPAVQLKFTSIDTPEIVLAK           | 3 | 0.999 |            |           |
| F1MTE8   | F1MTE8_BOVIN | Bt.63797  | Uncharacterized protein                                              | 0.999 |  | 2.2                              |   |       | 10,951,662 | 2,961,410 |
|          |              |           |                                                                      |       |  | AKQLLQOILVMDQDTKIATDYFLMEEK      | 3 | 0.999 |            |           |
|          |              |           |                                                                      |       |  | SSTPKASQRVLQDQCVFQAQSK           | 3 | 0.999 |            |           |
| F1MTI1   | F1MTI1_BOVIN | Bt.61982  | Uncharacterized protein (Fragment)                                   | 0.999 |  | 2.3                              |   |       | 1,789,265  | 333,534   |
|          |              |           |                                                                      |       |  | WQKRYOHLGPGCGLR                  | 3 | 0.999 |            |           |
| F1MTI6   | F1MTI6_BOVIN | Bt.104711 | Uncharacterized protein                                              | 0.999 |  | 3.4                              |   |       | 3,350,604  | 373,382   |
|          |              |           |                                                                      |       |  | HIFNNKGLVRSNGQVVK                | 3 | 0.999 |            |           |
| P18917   | PLRP4_BOVIN  | PRP4      | Placental prolactin-related protein 4                                | 0.999 |  | 9.2                              |   |       | 1,357,261  | 124,749   |
| Q2WFM8   | Q2WFM8_BOVIN | PRP5      | Prolactin-related protein 5                                          | 0.999 |  | 9.2                              |   |       | 1,357,261  | 124,749   |
| F1MTJ8   | F1MTJ8_BOVIN | PRP5      | Uncharacterized protein                                              | 0.999 |  | 9.2                              |   |       | 1,357,261  | 124,749   |
|          |              |           |                                                                      |       |  | SLSSNEDRRRSFYSLLFFCLR            | 3 | 0.999 |            |           |

|        |              |              |                                             |       |      |                                  |   |           |            |           |
|--------|--------------|--------------|---------------------------------------------|-------|------|----------------------------------|---|-----------|------------|-----------|
| F1MTK5 | F1MTK5_BOVIN | Bt.31482     | Uncharacterized protein                     | 0.999 | 0.9  |                                  |   | 4,063,295 | 698,470    |           |
| F1MTN6 | F1MTN6_BOVIN | Bt.63238     | Uncharacterized protein                     | 0.909 | 1.2  | AAQTMSTAPPVGSLSQR                | 3 | 0.999     | 2,098,879  | 288,877   |
| F1MTR4 | F1MTR4_BOVIN | IGSF8        | Uncharacterized protein                     | 0.999 | 2.0  | SIKNEFWTQEEETLKGTTTER            | 3 | 0.801     | 5,045,312  | 553,212   |
| F1MTR6 | F1MTR6_BOVIN |              | Uncharacterized protein (Fragment)          | 0.999 | 7.1  | YLGYSYSGKVELR                    | 3 | 0.999     | 1,482,775  | 238,093   |
| F1MTS2 | F1MTS2_BOVIN | Bt.106505    | Uncharacterized protein                     | 0.999 | 4.7  | EALFHQVNCSHFTIARLTIGNK           | 3 | 0.999     | 5,836,233  | 533,055   |
| F1MTT7 | F1MTT7_BOVIN | DCI          | Uncharacterized protein                     | 0.999 | 8.6  | QSTCEAVMALRARFLDAR               | 3 | 0.999     | 1,676,708  | 176,512   |
| F1MTV0 | F1MTV0_BOVIN | Bt.8282      | Uncharacterized protein (Fragment)          | 0.999 | 7.5  | DADTQNFVSVFCRDSIQKSLQAYLEK       | 3 | 0.999     | 792,165    | 136,600   |
| P81425 | DPP4_BOVIN   | DPP4         | Dipeptidyl peptidase 4                      | 0.999 | 3.1  |                                  |   |           | 792,165    | 136,600   |
| F1MTV2 | F1MTV2_BOVIN |              | Uncharacterized protein                     | 0.999 | 1.0  | PAEPHFTSDGNSFYKISNEEGYK          | 3 | 0.999     | 2,366,788  | 271,039   |
| F1MTV3 | F1MTV3_BOVIN | TECTA        | Uncharacterized protein                     | 1.000 | 1.0  | RPDEEYNEGTSSVQNRVR               | 3 | 0.999     | 6,768,846  | 460,024   |
| Q32LP4 | S4A10_BOVIN  | SLC4A10      | Sodium-driven chloride bicarbonate exchange | 0.999 | 2.6  | TCRGGVCAVEDGYQCQFPKR             | 3 | 0.999     | 1,490,508  | 262,216   |
| F1MTV6 | F1MTV6_BOVIN | SLC4A10      | Uncharacterized protein                     | 0.999 | 2.6  |                                  |   |           | 1,490,508  | 262,216   |
| F1MTX9 | F1MTX9_BOVIN | SLC38A1      | Uncharacterized protein                     | 0.999 | 4.9  | DRNDLVSGIDEFLDQVTVLPPGEWDPSIR    | 3 | 0.999     | 2,150,711  | 663,508   |
| F1MTZ3 | F1MTZ3_BOVIN | UBASH3B      | Uncharacterized protein (Fragment)          | 0.999 | 4.9  | ITCSVPELNSTIPNSTPDMCTPK          | 3 | 0.999     | 2,594,296  | 237,953   |
| F1MU08 | F1MU08_BOVIN | Bt.4803      | Uncharacterized protein                     | 0.999 | 1.4  | FSAPLPLELYTSSNFIFLKVKEDSAEVLK    | 3 | 0.999     | 2,884,544  | 224,000   |
| P18493 | PARP1_BOVIN  | PARP1        | Poly (ADP-ribose) polymerase 1              | 0.999 | 1.4  |                                  |   |           | 2,884,544  | 224,000   |
| F1MU15 | F1MU15_BOVIN | Bt.13087     | Uncharacterized protein                     | 0.999 | 4.5  | TLIDFAGAYKSNR                    | 3 | 0.999     | 589,510    | 65,920    |
| F1MU22 | F1MU22_BOVIN | CES2         | Uncharacterized protein                     | 0.999 | 4.0  | GVVWNTVCDSEWYDSEANVLCQDLGCGTVAR  | 3 | 0.999     | 2,753,150  | 148,368   |
| Q08DG4 | FBXL8_BOVIN  | FBXL8        | F-box/LRR-repeat protein 8                  | 0.999 | 10.4 | FAPPEPESWVSGVKDGTSSQPAK          | 3 | 0.999     | 7,584,948  | 3,262,058 |
| F1MU23 | F1MU23_BOVIN | FBXL8        | Uncharacterized protein                     | 0.999 | 10.4 |                                  |   |           | 7,584,948  | 3,262,058 |
| F1MU30 | F1MU30_BOVIN | Bt.9696      | Uncharacterized protein                     | 0.999 | 3.4  | DVLDVAHALCGAASALRHLDLR           | 3 | 0.999     | 1,886,904  | 244,416   |
| F1MU39 | F1MU39_BOVIN | MYH15        | Uncharacterized protein (Fragment)          | 0.999 | 1.2  | EVHCFVVRPVSFLHAFR                | 3 | 0.999     | 1,693,558  | 207,566   |
| F1MU42 | F1MU42_BOVIN | 782671       | Uncharacterized protein                     | 0.999 | 2.7  | HPELITFKYGNSSASGIEILAIER         | 3 | 0.999     | 471,782    | 89,464    |
| F1MU76 | F1MU76_BOVIN | Bt.45349     | Uncharacterized protein                     | 0.999 | 2.8  | HADSLAELESQVENLQQVKQTELEK        | 3 | 0.999     | 471,782    | 89,464    |
| F1MU45 | F1MU45_BOVIN | PCF11        | Uncharacterized protein (Fragment)          | 0.958 | 1.3  | LPINSVRSGMVPPK                   | 3 | 0.999     | 4,295,792  | 538,495   |
| F1MU48 | F1MU48_BOVIN | TOP2B        | Uncharacterized protein (Fragment)          | 0.999 | 2.1  | GQPVGGLRFEGPHGQPVGGLR            | 3 | 0.821     | 51,157,831 | 8,357,396 |
| F1MUA7 | F1MUA7_BOVIN | LOC532603    | Uncharacterized protein (Fragment)          | 0.999 | 4.3  | GIPVFEHKVEK                      | 3 | 0.999     | 6,590,496  | 390,413   |
| F1MUC1 | F1MUC1_BOVIN | Bt.93156     | Uncharacterized protein (Fragment)          | 0.999 | 2.1  | NMTCIKVSDIPESNIISWNGKIPVVEHK     | 3 | 0.999     | 1,166,721  | 151,748   |
| F1MUD1 | F1MUD1_BOVIN | Bt.87131     | Uncharacterized protein                     | 0.999 | 7.8  | CNRVSMALVAEYEEEMOVNLELEKDLR      | 3 | 0.999     | 16,053,183 | 1,696,328 |
| F1MUF3 | F1MUF3_BOVIN | P2RX5        | Uncharacterized protein                     | 0.999 | 7.7  | LESTTRSPVFSHLSSSLQGLWTRAYK       | 3 | 0.999     | 33,597,467 | 2,873,688 |
| F1MUG9 | F1MUG9_BOVIN | Bt.21212     | Uncharacterized protein (Fragment)          | 0.921 | 4.5  | AETLVFSTHAVISMARDGKLCLMFR        | 3 | 0.999     | 1,913,088  | 763,227   |
| F1MX08 | F1MX08_BOVIN | Bt.21212     | Uncharacterized protein (Fragment)          | 0.921 | 4.5  | CYQDSTDLSLOSSIITKVK              | 3 | 0.999     | 1,913,088  | 763,227   |
| Q5E9P5 | PAMR1_BOVIN  | PAMR1        | Inactive serine protease PAMR1              | 0.999 | 2.1  | TFLKSKCFSPENPYCFIFR              | 3 | 0.999     | 461,296    | 138,144   |
| F1MUJ4 | F1MUJ4_BOVIN | PAMR1        | Uncharacterized protein                     | 0.999 | 2.1  |                                  |   |           | 461,296    | 138,144   |
| F1MUK0 | F1MUK0_BOVIN | FER1L5       | Uncharacterized protein                     | 0.999 | 0.7  | KITGGPGLIHGHYAK                  | 3 | 0.999     | 752,518    | 95,536    |
| F1MUK2 | F1MUK2_BOVIN | MED24        | Uncharacterized protein                     | 0.999 | 5.5  | PVVKVIGGHQHHSR                   | 3 | 0.999     | 4,773,444  | 1,065,698 |
| F1MUM4 | F1MUM4_BOVIN | ZNF500       | Uncharacterized protein                     | 0.999 | 4.8  | EGLEAGTAAAGEKQALMCLQRLEK         | 3 | 0.999     | 11,004,958 | 1,757,834 |
| F1MUP1 | F1MUP1_BOVIN | FOLH1        | Uncharacterized protein                     | 0.999 | 3.5  | ILNPDHPCFRPDSTKVESLVALLNNSSEIK   | 3 | 0.999     | 2,658,790  | 643,284   |
| F1MUP9 | F1MUP9_BOVIN | VAT1         | Uncharacterized protein                     | 0.999 | 4.5  | THGGEQPPRRPPGLQDTPGAWA           | 3 | 0.999     | 6,505,963  | 1,860,318 |
| F1MUQ0 | F1MUQ0_BOVIN | Bt.3220      | Uncharacterized protein (Fragment)          | 0.999 | 6.9  | CLVLTGFGGYDKVKLQTR               | 3 | 0.999     | 699,241    | 75,031    |
| Q8SPX7 | CRYL1_BOVIN  | CRYL1        | Lambda-crystallin homolog                   | 0.999 | 6.9  |                                  |   |           | 699,241    | 75,031    |
| F1MUQ4 | F1MUQ4_BOVIN | CLIP4        | Uncharacterized protein                     | 0.999 | 4.0  | EAVEGALHVQECVPENLELKRK           | 3 | 0.999     | 1,022,976  | 299,176   |
| F1MUT7 | F1MUT7_BOVIN | Bt.19304     | Uncharacterized protein                     | 0.999 | 2.4  | VGLTRFCGTTAFASGQWAGIELDEPEGK     | 3 | 0.999     | 1,888,985  | 94,107    |
| G3MZW9 | G3MZW9_BOVIN | Bt.19304     | Uncharacterized protein                     | 0.999 | 6.9  |                                  |   |           | 1,888,985  | 94,107    |
| F1MUU5 | F1MUU5_BOVIN | NLRX1        | Uncharacterized protein                     | 0.905 | 1.9  | EQLQLTKSOLEAAQHAHAIR             | 3 | 0.999     | 34,515,375 | 4,111,161 |
| F1MUV0 | F1MUV0_BOVIN | RING1        | Uncharacterized protein (Fragment)          | 0.999 | 7.3  | YVGRVGEICGFSDTNLQK               | 2 | 0.905     | 1,538,762  | 225,510   |
| F1MUV2 | F1MUV2_BOVIN |              | Uncharacterized protein (Fragment)          | 0.999 | 3.1  | QYTIYAPGGGAFITLNGSLTLELVNEK      | 3 | 0.999     | 3,855,259  | 173,770   |
| F1MUW3 | F1MUW3_BOVIN | FGD5         | Uncharacterized protein (Fragment)          | 0.999 | 1.3  | NOLLSLOVPKFKVLLSVHMEK            | 3 | 0.999     | 3,371,685  | 582,721   |
| F1MUW6 | F1MUW6_BOVIN | TMF1         | Uncharacterized protein                     | 0.999 | 2.7  | EFFGQSQQGGQGNVKHRLLR             | 3 | 0.999     | 5,499,035  | 1,268,671 |
| F1MUY2 | F1MUY2_BOVIN | KRT6C        | Uncharacterized protein                     | 1.000 | 5.4  | TIESVEGKPEEANEITLMPNEETEMEEGR    | 3 | 0.999     | 4,672,819  | 137,616   |
| F1MUY5 | F1MUY5_BOVIN | STARD9       | Uncharacterized protein (Fragment)          | 0.999 | 1.9  | AGYEELIAQR                       | 2 | 0.973     | 1,998,301  | 675,986   |
| F1MV84 | F1MV84_BOVIN | SYCP2        | Uncharacterized protein                     | 0.999 | 1.2  | NKYEDEINKR                       | 3 | 1.000     |            |           |
| F1MVC0 | F1MVC0_BOVIN | Bt.9414      | Uncharacterized protein                     | 1.000 | 1.0  | NLDLDSIIAEVK                     | 2 | 0.999     |            |           |
| F1MVG5 | F1MVG5_BOVIN | Bt.106492    | Uncharacterized protein                     | 0.999 | 7.7  | TISPSFGD5AAVSLGQRRHWPAAQGPR      | 3 | 0.999     | 10,290,106 | 694,349   |
| F1MVJ7 | F1MVJ7_BOVIN | TRANK1       | Uncharacterized protein (Fragment)          | 0.999 | 1.0  | ELLLYFDASLEITNVAQK               | 3 | 0.999     | 6,631,425  | 507,679   |
| G3MYJ1 | G3MYJ1_BOVIN | TRANK1       | Uncharacterized protein (Fragment)          | 0.999 | 1.0  | SFPFVSKTLGVDLVALATRVIMR          | 3 | 0.999     |            |           |
| F1MVK1 | F1MVK1_BOVIN |              | Uncharacterized protein (Fragment)          | 0.999 | 2.2  | CPCRGIETPDFK                     | 3 | 0.999     | 2,115,380  | 99,090    |
| P01030 | CO4_BOVIN    | C4           | Complement C4 (Fragments)                   | 0.999 | 3.8  | PEHTAHSHSPIHRAAESREK             | 3 | 0.999     | 2,115,380  | 99,090    |
| F1MVK7 | F1MVK7_BOVIN | LOC100300829 | Uncharacterized protein (Fragment)          | 0.999 | 7.3  | CKEPLISIGNTVALLEQFIHCGVVLAR      | 3 | 0.999     | 1,481,785  | 249,995   |
| F1MVP8 | F1MVP8_BOVIN | Bt.23353     | Uncharacterized protein                     | 0.999 | 4.5  | ATILCLTEDTYVAPTPGYSGDGFSEK       | 3 | 0.999     | 2,236,834  | 390,629   |
| F1MVT7 | F1MVT7_BOVIN | Bt.35384     | Uncharacterized protein                     | 1.000 | 9.7  | SLRQSADTTNFSLNIMIEPQGTKR         | 3 | 0.999     | 2,550,870  | 405,378   |
| F1MVU7 | F1MVU7_BOVIN | Bt.87597     | Uncharacterized protein                     | 0.999 | 2.5  | DLGQFYAGLPAESYPIIKGVACKVASLFDSSK | 3 | 0.999     | 316,363    | 27,308    |
| F1MVY5 | F1MVY5_BOVIN | Bt.27312     | Uncharacterized protein                     | 0.999 | 1.9  | EWLCDGFLVDIMDLHREISELLRVSK       | 3 | 0.999     | 1,467,556  | 177,236   |
| Q08E26 | CRTC2_BOVIN  | CRTC2        | CREB-regulated transcription coactivator 2  | 0.999 | 1.9  | ALKELAELEER                      | 3 | 0.999     | 1,467,556  | 177,236   |
|        |              |              |                                             |       |      | STRHHGLVERVQR                    | 3 | 0.999     |            |           |

|        |              |           |                                                  |       |                                   |   |            |            |           |
|--------|--------------|-----------|--------------------------------------------------|-------|-----------------------------------|---|------------|------------|-----------|
| F1MVZ2 | F1MVZ2_BOVIN | BRSK2     | Uncharacterized protein (Fragment)               | 0.953 | 3.1                               |   | 2,601,910  | 334,108    |           |
| F1MVZ7 | F1MVZ7_BOVIN | CAPN13    | Uncharacterized protein                          | 0.999 | LQVPTPEEMSNLTPESSELAK             | 3 | 0.953      | 1,570,027  | 241,566   |
| F1MVZ8 | F1MVZ8_BOVIN | NGEF      | Uncharacterized protein (Fragment)               | 0.999 | SFRAFSTGNS                        | 3 | 0.999      | 7,907,938  | 1,122,648 |
| F1MW01 | F1MW01_BOVIN | ESPL1     | Uncharacterized protein                          | 0.999 | AEELDQGGQTLANVFILRLLENSDDR        | 3 | 0.999      | 25,846,279 | 4,282,566 |
| F1MW07 | F1MW07_BOVIN | TMC2      | Uncharacterized protein                          | 0.999 | VLESGLKPVVARIPHLEPWR              | 3 | 0.999      | 2,362,450  | 86,055    |
| P12260 | F13A_BOVIN   | F13A1     | Coagulation factor XIII A chain (Fragment)       | 0.999 | YRLPMAYFMGVSVFGLYMLVIR            | 3 | 0.999      | 1,358,687  | 860,492   |
| F1MW44 | F1MW44_BOVIN | P12260    | Uncharacterized protein                          | 0.999 | 6.1                               |   | 1,358,687  | 860,492    |           |
| F1MW62 | F1MW62_BOVIN | BL61505   | Uncharacterized protein (Fragment)               | 0.999 | MSESSGTAFFGGR                     | 3 | 0.999      | 1,712,121  | 189,722   |
| F1NOP2 | F1NOP2_BOVIN | DDX49     | Uncharacterized protein                          | 0.999 | 4.9                               |   | 1,712,121  | 189,722    |           |
| F1MW73 | F1MW73_BOVIN | MGC148692 | Uncharacterized protein                          | 0.999 | QPTPVQLGCIPALEGRDCLGCAK           | 3 | 0.999      | 1,811,801  | 307,117   |
| F1MW75 | F1MW75_BOVIN | ICA1      | Uncharacterized protein                          | 0.999 | 3.4                               |   | 1,703,241  | 330,475    |           |
| F1MW90 | F1MW90_BOVIN | BL29902   | Uncharacterized protein                          | 0.931 | PAGOTPPSPFLSKVSRPYLVLLTR          | 3 | 0.999      | 593,999    | 50,147    |
| F1MWC0 | F1MWC0_BOVIN | BL96723   | Uncharacterized protein                          | 0.999 | PAWQKFSDDGGGEGESIR                | 3 | 0.999      | 11,195,477 | 8,139,864 |
| F1MWD7 | F1MWD7_BOVIN | ZXDC      | Uncharacterized protein (Fragment)               | 0.999 | ICGLSQEENELGKFLRSQGFQDK           | 3 | 0.999      | 1,055,142  | 145,832   |
| G3MYH0 | G3MYH0_BOVIN | ZXDC      | Uncharacterized protein (Fragment)               | 0.999 | 2.0                               |   | 1,055,142  | 145,832    |           |
| F1MWF5 | F1MWF5_BOVIN | BL31807   | Uncharacterized protein                          | 0.999 | PWSPGLSSSSSDSVWPLGK               | 2 | 0.931      | 600,672    | 73,398    |
| F1MWG7 | F1MWG7_BOVIN | TP53BP2   | Uncharacterized protein (Fragment)               | 0.999 | 1.2                               |   | 16,799,363 | 5,875,207  |           |
| Q2TN6  | PCID2_BOVIN  | PCID2     | PCI domain-containing protein 2                  | 0.999 | GVIDIQDALDRDGEVK                  | 3 | 0.999      | 2,377,552  | 309,745   |
| F1MWG9 | F1MWG9_BOVIN | PCID2     | Uncharacterized protein                          | 0.999 | 4.3                               |   | 2,377,552  | 309,745    |           |
| F1MW11 | F1MW11_BOVIN |           | Uncharacterized protein (Fragment)               | 0.999 | AASSPAGRPAQAPGAALPGPGAAGPQDLVLR   | 3 | 0.999      | 1,077,861  | 271,602   |
| F1MWL9 | F1MWL9_BOVIN |           | Uncharacterized protein (Fragment)               | 0.999 | 2.1                               |   | 4,665,921  | 384,934    |           |
| F1MWM8 | F1MWM8_BOVIN | BL104279  | Uncharacterized protein (Fragment)               | 1.000 | EISHEIDLINLLQVK                   | 3 | 0.999      | 469,684    | 69,225    |
| F1MWS2 | F1MWS2_BOVIN | BL9097    | Uncharacterized protein (Fragment)               | 0.999 | NFQQAVQSALTKPHPRAPHFSPVYVK        | 3 | 0.999      | 1,003,565  | 83,710    |
| F1N5C7 | F1N5C7_BOVIN | BL20028   | Uncharacterized protein                          | 0.999 | AHGDGTPHPDPDCAR                   | 3 | 0.999      | 4,516,463  | 319,929   |
| F1MWT0 | F1MWT0_BOVIN | MAN2C1    | Uncharacterized protein                          | 0.999 | 2.5                               |   | 4,516,463  | 319,929    |           |
| F1MWU6 | F1MWU6_BOVIN | BL30449   | Uncharacterized protein                          | 0.999 | GRTNHSAFLFGFGDGGGPTQTMDVR         | 3 | 0.999      | 545,736    | 73,635    |
| F1MWZ1 | F1MWZ1_BOVIN | CCPG1     | Uncharacterized protein                          | 0.925 | 5.5                               |   | 2,069,637  | 695,022    |           |
| F1MX06 | F1MX06_BOVIN | TARS2     | Uncharacterized protein                          | 0.999 | LPTPIPEIAMVLAASVLCFTSSLDTR        | 3 | 0.999      | 4,513,863  | 1,243,347 |
| F1MX14 | F1MX14_BOVIN | MDGA2     | Uncharacterized protein (Fragment)               | 1.000 | 1.1                               |   | 20,663,956 | 781,410    |           |
| F1MX17 | F1MX17_BOVIN | BL86635   | Uncharacterized protein (Fragment)               | 0.999 | GPGIEGDIADDSIAEGEAKQDLTK          | 3 | 0.999      | 1,620,839  | 135,414   |
| F1N7G4 | F1N7G4_BOVIN | ISLR2     | Uncharacterized protein                          | 0.999 | SIRVDVYLDDPVVTVHQSIGEAK           | 3 | 0.999      | 1,620,839  | 135,414   |
| F1MX25 | F1MX25_BOVIN | TNRC6A    | Uncharacterized protein (Fragment)               | 1.000 | 1.2                               |   | 390,389    | 83,115     |           |
| G3N258 | G3N258_BOVIN | TNRC6A    | Uncharacterized protein (Fragment)               | 1.000 | 1.2                               |   | 390,389    | 83,115     |           |
| F1MX34 | F1MX34_BOVIN |           | Uncharacterized protein (Fragment)               | 0.999 | AKSPNGSSSNVWPEFRPGEPWK            | 3 | 0.999      | 5,791,980  | 468,093   |
| P61635 | STAT3_BOVIN  | STAT3     | Signal transducer and activator of transcription | 0.999 | 1.2                               |   | 624,715    | 101,010    |           |
| F1MX38 | F1MX38_BOVIN | STAT3     | Uncharacterized protein                          | 0.999 | 3.1                               |   | 624,715    | 101,010    |           |
| F1MX50 | F1MX50_BOVIN | CREG1     | Uncharacterized protein                          | 0.999 | YCRPESQEHPEADPGSAAPYLTKK          | 3 | 0.999      | 580,293    | 70,621    |
| F1MX51 | F1MX51_BOVIN | BL19933   | Uncharacterized protein (Fragment)               | 0.999 | 7.7                               |   | 1,083,661  | 81,471     |           |
| F1MX58 | F1MX58_BOVIN | BL74139   | Uncharacterized protein                          | 0.999 | GRPFADVLVLSLSDGPPGK               | 3 | 0.999      | 4,664,780  | 508,061   |
| F1MX60 | F1MX60_BOVIN | CYFIP2    | Uncharacterized protein                          | 0.999 | 3.2                               |   | 3,953,804  | 588,965    |           |
| F1MX80 | F1MX80_BOVIN | METTL3    | Uncharacterized protein                          | 0.999 | VQQAEMVLELIRDQGGFR                | 3 | 0.999      | 3,015,235  | 714,064   |
| F1MX93 | F1MX93_BOVIN | MYO5C     | Uncharacterized protein                          | 0.999 | 3.4                               |   | 34,773,934 | 976,431    |           |
| F1MXA8 | F1MXA8_BOVIN | BL106220  | Uncharacterized protein                          | 0.999 | ANSLGDLIAQKNSGVTANGGPR            | 3 | 0.999      | 3,063,579  | 380,692   |
| F1MXC4 | F1MXC4_BOVIN | BL104790  | Uncharacterized protein                          | 1.000 | KKTILDQIFVWEQNLEQFQMDLFR          | 3 | 0.999      | 1,184,404  | 265,689   |
| F1MXF5 | F1MXF5_BOVIN | AKAP9     | Uncharacterized protein (Fragment)               | 0.999 | NSGVTANGGPRSKLAGYCR               | 3 | 0.999      | 462,091    | 83,830    |
| F1MXG9 | F1MXG9_BOVIN | BL32407   | Uncharacterized protein (Fragment)               | 0.999 | 1.4                               |   | 7,137,938  | 220,495    |           |
| G3N294 | G3N294_BOVIN | BL32407   | Uncharacterized protein (Fragment)               | 0.999 | 4.9                               |   | 7,137,938  | 220,495    |           |
| F1MXH9 | F1MXH9_BOVIN | LOC615633 | Uncharacterized protein (Fragment)               | 0.999 | QIFGELADVTAKYSPSDEELHR            | 3 | 0.999      | 13,694,842 | 1,375,483 |
| F1MXJ0 | F1MXJ0_BOVIN | SLMO1     | Uncharacterized protein (Fragment)               | 0.944 | 17.1                              |   | 4,970,892  | 497,230    |           |
| F1MXJ2 | F1MXJ2_BOVIN | BL37052   | Uncharacterized protein (Fragment)               | 0.999 | 12.6                              |   | 4,574,441  | 1,080,649  |           |
| F1MXK2 | F1MXK2_BOVIN | NUFIP2    | Uncharacterized protein (Fragment)               | 0.999 | 1.5                               |   | 43,391,525 | 13,069,621 |           |
| Q8HXQ5 | MRP1_BOVIN   | ABCC1     | Multidrug resistance-associated protein          | 1.000 | 1.7                               |   | 13,728,564 | 3,013,498  |           |
| F1MY01 | F1MY01_BOVIN | ABCC1     | Uncharacterized protein (Fragment)               | 1.000 | 3.2                               |   | 13,728,564 | 3,013,498  |           |
| F1MXK7 | F1MXK7_BOVIN | BL88646   | Uncharacterized protein (Fragment)               | 1.000 | 3.2                               |   | 13,728,564 | 3,013,498  |           |
| F1MXQ3 | F1MXQ3_BOVIN | BL11748   | Uncharacterized protein (Fragment)               | 0.999 | LECVGNCIVLASFVAISR                | 3 | 0.999      | 8,688,817  | 2,262,709 |
| F1MXR8 | F1MXR8_BOVIN | BL44585   | Uncharacterized protein                          | 0.999 | VSLARAVYCDSDVYLLDPLSAVDHVGK       | 3 | 0.999      | 1,836,668  | 312,147   |
| F1MXS0 | F1MXS0_BOVIN | CNTN6     | Uncharacterized protein (Fragment)               | 0.999 | 1.7                               |   | 1,646,786  | 225,411    |           |
| F1MXS1 | F1MXS1_BOVIN | RANBP2    | Uncharacterized protein                          | 0.999 | 2.5                               |   | 4,038,417  | 892,456    |           |
| F1MXS6 | F1MXS6_BOVIN | BL93404   | Uncharacterized protein (Fragment)               | 1.000 | 2.5                               |   | 1,083,408  | 207,439    |           |
| P04258 | COL3A1_BOVIN | COL3A1    | Collagen alpha-1(I) chain                        | 1.000 | 1.8                               |   | 16,974,072 | 1,482,895  |           |
| F1MXS8 | F1MXS8_BOVIN | COL3A1    | Uncharacterized protein                          | 1.000 | 5.5                               |   | 16,974,072 | 1,482,895  |           |
| F1N2Y4 | F1N2Y4_BOVIN | COL3A1    | Uncharacterized protein (Fragment)               | 1.000 | 4.0                               |   | 16,974,072 | 1,482,895  |           |
| F1MXV1 | F1MXV1_BOVIN | BL54421   | Uncharacterized protein (Fragment)               | 0.959 | 5.5                               |   | 902,409    | 139,346    |           |
| F1MXV4 | F1MXV4_BOVIN | BL77614   | Uncharacterized protein                          | 0.999 | DGPRGPTGPIGPPGAPGQDGKESGAPGVGIAGR | 3 | 0.999      | 1,999,752  | 204,701   |
|        |              |           |                                                  |       | 5.5                               |   |            |            |           |
|        |              |           |                                                  |       | 1.2                               |   |            |            |           |
|        |              |           |                                                  |       | 2.9                               |   |            |            |           |
|        |              |           |                                                  |       | NSPSSLSSESSETGSGGGTYRQK           | 3 | 0.831      |            |           |

| Accession | Gene Symbol  | Species      | Protein Name                                           | Score | Accession                        | Score | Count | E-value     | Start      | End |
|-----------|--------------|--------------|--------------------------------------------------------|-------|----------------------------------|-------|-------|-------------|------------|-----|
| F1MXV8    | F1MXV8_BOVIN | SERPINA3-7   | Uncharacterized protein                                | 1.000 | SNSDITSELDVDSDFDECISPTYKTGPSLHR  | 3     | 0.999 | 53,548,111  | 14,846,672 |     |
|           |              |              |                                                        |       | 14.2                             |       |       |             |            |     |
|           |              |              |                                                        |       | DAAFYASEVLTNFK                   | 3     | 0.982 |             |            |     |
|           |              |              |                                                        |       | DILSOLGIK                        | 2     | 0.905 |             |            |     |
|           |              |              |                                                        |       | FSISSHYQLK                       | 3     | 0.936 |             |            |     |
|           |              |              |                                                        |       | IFTSDADFSGITDDHK                 | 2     | 1.000 |             |            |     |
|           |              |              |                                                        |       | IFTSDADFSGITDDHK                 | 3     | 0.984 |             |            |     |
|           |              |              |                                                        |       | KIFTSADDFSGITDDHK                | 3     | 1.000 |             |            |     |
|           |              |              |                                                        |       | LINEYVK                          | 2     | 0.952 |             |            |     |
| F1MXW5    | F1MXW5_BOVIN | OXSM         | 3-oxoacyl-[acyl-carrier-protein] synthase, mitochondri | 0.999 | 6.1                              |       |       | 1,687,006   | 350,221    |     |
| Q0VCA7    | OXSM_BOVIN   | OXSM         | 3-oxoacyl-[acyl-carrier-protein] synthase, mitochondri | 0.999 | 6.1                              |       |       | 1,687,006   | 350,221    |     |
| F1MXX0    | F1MXX0_BOVIN | IMMT         | Uncharacterized protein                                | 0.999 | DAGIQPEEVSYNAHAHATSTPLGDAAENK    | 3     | 0.999 | 2,659,516   | 439,712    |     |
| F1MXX8    | F1MXX8_BOVIN | NEURL4       | Uncharacterized protein                                | 0.999 | LFEMLVGLSPPTVPLPKKPIQSGPLK       | 3     | 0.999 | 2,130,224   | 201,452    |     |
| F1MY03    | F1MY03_BOVIN | LOC100138954 | Uncharacterized protein                                | 0.999 | ICEKFGPNLDTCPGPTILGLR            | 3     | 0.999 | 2,103,919   | 269,554    |     |
| Q28151    | OZF_BOVIN    | ZNF146       | Zinc finger protein OZF                                | 0.999 | 7.9                              |       |       | 2,103,919   | 269,554    |     |
| F1MY16    | F1MY16_BOVIN | AKAP13       | Uncharacterized protein (Fragment)                     | 0.999 | MSHLSQQRICSGENPFACKVCGK          | 3     | 0.999 | 3,405,841   | 386,183    |     |
| F1MY22    | F1MY22_BOVIN | TMEM63B      | Uncharacterized protein                                | 0.999 | RPPPPPPEAPGVPEEPGATAGAEADR       | 3     | 0.999 | 2,769,213   | 579,791    |     |
| F1MY58    | F1MY58_BOVIN | TOML1        | Uncharacterized protein                                | 0.999 | DRVEQEYVASAMHGDSDHR              | 3     | 0.999 | 6,908,513   | 603,984    |     |
| F1MY69    | F1MY69_BOVIN | SLFN1        | Uncharacterized protein (Fragment)                     | 0.999 | EFVKDQLVLLNPR                    | 3     | 0.999 | 1,691,990   | 205,354    |     |
| F1MY82    | F1MY82_BOVIN | PRKCH        | Uncharacterized protein                                | 0.999 | DGSIQPLVSAQIQCWRQKWMAELSK        | 3     | 0.999 | 37,659,313  | 4,096,823  |     |
| F1MY96    | F1MY96_BOVIN | Bt.53024     | Uncharacterized protein (Fragment)                     | 0.999 | TLAGMGLQPNGISPTSK                | 3     | 0.999 | 2,666,817   | 277,627    |     |
| F1MYB0    | F1MYB0_BOVIN | STOX2        | Uncharacterized protein (Fragment)                     | 0.999 | THTGERPYVCGVCGK                  | 3     | 0.999 | 7,096,912   | 865,054    |     |
|           |              |              |                                                        |       | GPGGGPVAPGTVEGLANGRLQHGAESTLDK   | 3     | 0.999 |             |            |     |
|           |              |              |                                                        |       | RTEMPFPSPRGSSHSK                 | 3     | 0.999 |             |            |     |
| F1MYC6    | F1MYC6_BOVIN | Bt.35994     | Uncharacterized protein                                | 0.999 | 4.3                              |       |       | 4,651,523   | 707,393    |     |
| Q5W5U4    | DDX4_BOVIN   | DDX4         | Probable ATP-dependent RNA helicase DDX4               | 0.999 | 4.3                              |       |       | 4,651,523   | 707,393    |     |
| F1MYC9    | F1MYC9_BOVIN | SPTBN1       | Uncharacterized protein                                | 1.000 | SNYLFAVAGVGQGGACRVDVQQTLQVGQYSKR | 3     | 0.999 | 6,254,804   | 590,011    |     |
|           |              |              |                                                        |       | 8                                |       |       |             |            |     |
|           |              |              |                                                        |       | HALVEADIGIAERVRGNASAQK           | 3     | 0.999 |             |            |     |
|           |              |              |                                                        |       | HQILEQAVEDYAEVHQLSKTSR           | 3     | 0.882 |             |            |     |
|           |              |              |                                                        |       | LVSQDNFGFDLPVAVAAATK             | 3     | 0.999 |             |            |     |
| F1MYE0    | F1MYE0_BOVIN | IRS1         | Uncharacterized protein                                | 0.999 | 3.7                              |       |       | 6,524,879   | 1,197,280  |     |
|           |              |              |                                                        |       | CPSLQAPREEDTGAEEYMMDLGPGR        | 3     | 0.999 |             |            |     |
|           |              |              |                                                        |       | SSAPKRSIPLESCFNINIK              | 3     | 0.999 |             |            |     |
| F1MYE4    | F1MYE4_BOVIN | CHAD         | Uncharacterized protein                                | 0.999 | 3.3                              |       |       | 1,730,088   | 212,920    |     |
| F1MYG5    | F1MYG5_BOVIN | LMNA         | Uncharacterized protein                                | 0.999 | NNFVFLAANSFR                     | 3     | 0.999 | 4,237,044   | 1,604,350  |     |
| F1MYH5    | F1MYH5_BOVIN | AKAP4        | Uncharacterized protein                                | 0.999 | LVEIDNKKREFESR                   | 3     | 0.999 | 2,916,079   | 343,198    |     |
| Q9BE97    | ARNT_BOVIN   | ARNT         | Aryl hydrocarbon receptor nuclear translocato          | 0.999 | 2.4                              |       |       | 9,333,261   | 2,441,282  |     |
| F1MYI1    | F1MYI1_BOVIN | ARNT         | Uncharacterized protein (Fragment)                     | 0.999 | 2.4                              |       |       | 9,333,261   | 2,441,282  |     |
| F1N7L0    | F1N7L0_BOVIN | Bt.63828     | Uncharacterized protein                                | 0.999 | 4.4                              |       |       | 409,339     | 49,604     |     |
| F1MYI7    | F1MYI7_BOVIN | Bt.63828     | Uncharacterized protein (Fragment)                     | 0.999 | 4.6                              |       |       | 409,339     | 49,604     |     |
| Q07263    | ACHA3_BOVIN  | CHRNA3       | Neuronal acetylcholine receptor subunit alpha-         | 0.999 | 4.4                              |       |       | 409,339     | 49,604     |     |
| F1MYJ4    | F1MYJ4_BOVIN | AKT3         | Uncharacterized protein                                | 0.999 | 4.0                              |       |       | 1,263,056   | 218,422    |     |
| F1MYJ6    | F1MYJ6_BOVIN | Bt.31718     | Uncharacterized protein (Fragment)                     | 0.999 | 3.1                              |       |       | 1,344,114   | 148,823    |     |
|           |              |              |                                                        |       | DVILTLOEKLKIKGIEHFSMLLEQR        | 3     | 0.999 |             |            |     |
|           |              |              |                                                        |       | RDVPLGFGFVAGSEK                  | 3     | 0.999 |             |            |     |
| F1MYM9    | F1MYM9_BOVIN | Bt.100599    | Uncharacterized protein                                | 0.999 | 1.1                              |       |       | 1,658,250   | 185,833    |     |
| F1N618    | F1N618_BOVIN | Bt.100599    | Uncharacterized protein                                | 0.999 | 1.1                              |       |       | 1,658,250   | 185,833    |     |
| F1MYN2    | F1MYN2_BOVIN | CGN          | Uncharacterized protein                                | 0.999 | KATQQAELSNELATERSAAQK            | 3     | 0.999 | 3,617,369   | 849,273    |     |
|           |              |              |                                                        |       | 4.2                              |       |       |             |            |     |
|           |              |              |                                                        |       | ASTYGVAVRVQGIAGQPVVVLSNGEK       | 3     | 0.999 |             |            |     |
|           |              |              |                                                        |       | QDCEEAQAQMAAETAAVLGQRR           | 3     | 0.873 |             |            |     |
| F1MYN5    | F1MYN5_BOVIN | Bt.61392     | Uncharacterized protein                                | 1.000 | 4.3                              |       |       | 795,966     | 69,820     |     |
|           |              |              |                                                        |       | QGETADFAPDGGDQLQETAK             | 2     | 1.000 |             |            |     |
|           |              |              |                                                        |       | GYHLNEEGTR                       | 2     | 0.925 |             |            |     |
| F1MYN8    | F1MYN8_BOVIN | SON          | Uncharacterized protein                                | 0.999 | 1.4                              |       |       | 3,340,504   | 273,968    |     |
| F1MYQ3    | F1MYQ3_BOVIN | Bt.6105      | Uncharacterized protein (Fragment)                     | 0.999 | 1.1                              |       |       | 2,678,778   | 134,242    |     |
| F1MYQ7    | F1MYQ7_BOVIN | FRY          | Uncharacterized protein (Fragment)                     | 0.999 | 1.4                              |       |       | 3,418,682   | 418,038    |     |
|           |              |              |                                                        |       | NEVNVPCLRNVESELYDITLLESSR        | 3     | 0.999 |             |            |     |
|           |              |              |                                                        |       | TDFHFIDSETPIIGRR                 | 3     | 0.999 |             |            |     |
| F1MYS7    | F1MYS7_BOVIN | EIF4B        | Uncharacterized protein                                | 0.999 | 2.3                              |       |       | 1,567,048   | 76,838     |     |
| F1MYT8    | F1MYT8_BOVIN | TRAF3IP2     | Uncharacterized protein                                | 0.999 | AEENPASKFSSASK                   | 3     | 0.999 | 5,955,355   | 345,541    |     |
| F1MYU6    | F1MYU6_BOVIN | PAG3         | Uncharacterized protein                                | 0.999 | KEHVPTWLQNHYSWPK                 | 3     | 0.999 | 2,648,998   | 658,238    |     |
| F1MYV9    | F1MYV9_BOVIN | OXSR1        | Uncharacterized protein                                | 0.999 | HSKYYSICSAVNTLPSIIIFTINGINYPVGR  | 3     | 0.999 | 3,370,576   | 1,127,101  |     |
| F1MYW0    | F1MYW0_BOVIN | NT5DC3       | Uncharacterized protein                                | 0.999 | 5.5                              |       |       | 11,660,350  | 987,525    |     |
|           |              |              |                                                        |       | IVVEPQSNRSVTFKLAGVGEVDIPDDGK     | 3     | 0.999 |             |            |     |
|           |              |              |                                                        |       | 6.2                              |       |       |             |            |     |
|           |              |              |                                                        |       | MATAAVTAARGAGAR                  | 3     | 0.999 |             |            |     |
|           |              |              |                                                        |       | YEYDPNFAIRGLHYDQOR               | 3     | 0.999 |             |            |     |
| F1MYW1    | F1MYW1_BOVIN | Bt.89026     | Uncharacterized protein (Fragment)                     | 0.999 | 0.9                              |       |       | 3,342,617   | 300,082    |     |
| F1MYW2    | F1MYW2_BOVIN | Bt.32395     | Uncharacterized protein                                | 0.999 | 2.0                              |       |       | 6,798,525   | 459,780    |     |
|           |              |              |                                                        |       | LGQGRNARSGR                      | 3     | 0.999 |             |            |     |
|           |              |              |                                                        |       | TDSFFLEPLMPAVLRPAEK              | 3     | 0.999 |             |            |     |
| F1MYW3    | F1MYW3_BOVIN | SEMA3E       | Uncharacterized protein (Fragment)                     | 0.999 | 3.9                              |       |       | 7,568,157   | 2,364,233  |     |
| F1MYW7    | F1MYW7_BOVIN | HM13         | Uncharacterized protein                                | 0.999 | NPVIFLGNFTTSNIFRGHAICVYHMSSIR    | 3     | 0.999 | 28,022,792  | 2,121,700  |     |
| F1MYX1    | F1MYX1_BOVIN | Bt.21487     | Uncharacterized protein                                | 0.999 | 4.8                              |       |       | 6,254,250   | 1,848,977  |     |
| G3MYG2    | G3MYG2_BOVIN | Bt.21487     | Uncharacterized protein                                | 0.999 | 2.6                              |       |       | 6,254,250   | 1,848,977  |     |
| F1MYX6    | F1MYX6_BOVIN | SLC7A8       | Uncharacterized protein                                | 0.999 | DFLEKTALVMSKSTHPK                | 3     | 0.999 | 4,663,000   | 491,688    |     |
| F1MYZ1    | F1MYZ1_BOVIN | TMPPSS3      | Uncharacterized protein (Fragment)                     | 0.999 | 2.7                              |       |       |             |            |     |
|           |              |              |                                                        |       | EGHLPVLAMIHVK                    | 3     | 0.999 |             |            |     |
| F1MYZ3    | F1MYZ3_BOVIN | Bt.18271     | Uncharacterized protein (Fragment)                     | 0.999 | 4.1                              |       |       | 193,326,125 | 25,070,722 |     |
|           |              |              |                                                        |       | LVGATSFSGIGCAEVNKPQVYTR          | 3     | 0.999 |             |            |     |
|           |              |              |                                                        |       | 0.5                              |       |       | 3,809,246   | 336,797    |     |
|           |              |              |                                                        |       | PLLEEQLLQDLDQERQEQQQQR           | 3     | 0.999 |             |            |     |
| Q5E9E0    | Q5E9E0_BOVIN | LGALS9       | Galectin 9 short isoform                               | 0.999 | 9.3                              |       |       | 853,893     | 112,872    |     |
| Q3MHZ8    | LEG9_BOVIN   | LGALS9       | Galectin-9                                             | 0.999 | 8.5                              |       |       | 853,893     | 112,872    |     |
| F1M212    | F1M212_BOVIN | LGALS9       | Uncharacterized protein                                | 0.999 | 8.5                              |       |       | 853,893     | 112,872    |     |
| F1M223    | F1M223_BOVIN | Bt.71543     | Uncharacterized protein (Fragment)                     | 0.999 | 2.0                              |       |       | 970,653     | 185,522    |     |
|           |              |              |                                                        |       | EFLTFEVLNDSGSAGLVSVKGNR          | 3     | 0.999 |             |            |     |
| Q97817-10 | LPHN2_BOVIN  | LPHN2        | Isoform 10 of Latrophilin-2                            | 0.999 | 1.8                              |       |       | 229,837     | 32,310     |     |
| Q97817-11 | LPHN2_BOVIN  | LPHN2        | Isoform 11 of Latrophilin-2                            | 0.999 | 1.8                              |       |       | 229,837     | 32,310     |     |
| Q97817-5  | LPHN2_BOVIN  | LPHN2        | Isoform 5 of Latrophilin-2                             | 0.999 | 1.8                              |       |       | 229,837     | 32,310     |     |
| Q97817-6  | LPHN2_BOVIN  | LPHN2        | Isoform 6 of Latrophilin-2                             | 0.999 | 1.8                              |       |       | 229,837     | 32,310     |     |
| Q97817-7  | LPHN2_BOVIN  | LPHN2        | Isoform 7 of Latrophilin-2                             | 0.999 | 1.8                              |       |       | 229,837     | 32,310     |     |
| Q97817-8  | LPHN2_BOVIN  | LPHN2        | Isoform 8 of Latrophilin-2                             | 0.999 | 1.8                              |       |       | 229,837     | 32,310     |     |
| Q97817-9  | LPHN2_BOVIN  | LPHN2        | Isoform 9 of Latrophilin-2                             | 0.999 | 1.8                              |       |       | 229,837     | 32,310     |     |
| Q97817    | LPHN2_BOVIN  | LPHN2        | Latrophilin-2                                          | 0.999 | 1.8                              |       |       | 229,837     | 32,310     |     |
| F1M263    | F1M263_BOVIN | LPHN2        | Uncharacterized protein                                | 0.999 | 1.8                              |       |       | 229,837     | 32,310     |     |
| F1M268    | F1M268_BOVIN | LPHN2        | Uncharacterized protein (Fragment)                     | 0.999 | 1.8                              |       |       | 229,837     | 32,310     |     |
| F1M271    | F1M271_BOVIN | LPHN2        | Uncharacterized protein (Fragment)                     | 0.999 | 1.8                              |       |       | 229,837     | 32,310     |     |
| G3N1Y2    | G3N1Y2_BOVIN | LPHN2        | Uncharacterized protein (Fragment)                     | 0.999 | 1.8                              |       |       | 229,837     | 32,310     |     |

|          |              |           |                                                |       |  |                                 |   |       |  |  |            |           |
|----------|--------------|-----------|------------------------------------------------|-------|--|---------------------------------|---|-------|--|--|------------|-----------|
|          |              |           |                                                |       |  | AKPEGTDSYSQLTAEAEHLQSPNR        | 3 | 0.999 |  |  |            |           |
| F1M264   | F1M264_BOVIN | ROR1      | Uncharacterized protein (Fragment)             | 0.999 |  | 2.1                             |   |       |  |  | 213.811    | 19.368    |
| G3N302   | G3N302_BOVIN | ROR1      | Uncharacterized protein (Fragment)             | 0.999 |  | 1.9                             |   |       |  |  | 213.811    | 19.368    |
|          |              |           |                                                |       |  | GNVEMSMNLNAYKPK                 | 3 | 0.999 |  |  |            |           |
| F1M273   | F1M273_BOVIN | REPS2     | Uncharacterized protein (Fragment)             | 1.000 |  | 4.4                             |   |       |  |  | 847.946    | 119.493   |
|          |              |           |                                                |       |  | SLOPDPSFSISGSAKNFFTK            | 3 | 0.999 |  |  |            |           |
| F1M276   | F1M276_BOVIN | Bt.80668  | Uncharacterized protein (Fragment)             | 0.999 |  | 2.4                             |   |       |  |  | 1,574.903  | 152.101   |
|          |              |           |                                                |       |  | ASVKLESSAAAFSEYNDASAEGFSR       | 3 | 0.999 |  |  |            |           |
| P81282-2 | CSPG2_BOVIN  | VCAN      | Isoform V1 of Versican core protein            | 0.999 |  | 0.9                             |   |       |  |  | 572.799    | 46.260    |
| P81282-3 | CSPG2_BOVIN  | VCAN      | Isoform V2 of Versican core protein            | 0.999 |  | 1.3                             |   |       |  |  | 572.799    | 46.260    |
| P81282-4 | CSPG2_BOVIN  | VCAN      | Isoform V3 of Versican core protein            | 0.999 |  | 3.2                             |   |       |  |  | 572.799    | 46.260    |
| F1M283   | F1M283_BOVIN | VCAN      | Uncharacterized protein                        | 0.999 |  | 1.3                             |   |       |  |  | 572.799    | 46.260    |
| F1M285   | F1M285_BOVIN | VCAN      | Uncharacterized protein                        | 0.999 |  | 0.6                             |   |       |  |  | 572.799    | 46.260    |
| F1N615   | F1N615_BOVIN | VCAN      | Uncharacterized protein                        | 0.999 |  | 0.9                             |   |       |  |  | 572.799    | 46.260    |
| F1N617   | F1N617_BOVIN | VCAN      | Uncharacterized protein                        | 0.999 |  | 3.2                             |   |       |  |  | 572.799    | 46.260    |
| P81282   | CSPG2_BOVIN  | VCAN      | Versican core protein                          | 0.999 |  | 0.6                             |   |       |  |  | 572.799    | 46.260    |
|          |              |           |                                                |       |  | GRVSVTHPEDVGDASLTMVK            | 3 | 0.999 |  |  |            |           |
| F1M291   | F1M291_BOVIN | LOC522232 | Uncharacterized protein (Fragment)             | 0.999 |  | 2.2                             |   |       |  |  | 752.274    | 212.616   |
|          |              |           |                                                |       |  | GLGEVDCKEIGDCVPGGAASPDLCALPDYLR | 3 | 0.999 |  |  |            |           |
| F1M293   | F1M293_BOVIN | MAMDC2    | Uncharacterized protein (Fragment)             | 0.999 |  | 4.0                             |   |       |  |  | 2,106.271  | 582.067   |
|          |              |           |                                                |       |  | GMSVRSDAIDDIKFKQAGSCAEMEDK      | 3 | 0.999 |  |  |            |           |
| F1M2A7   | F1M2A7_BOVIN | Bt.9590   | Uncharacterized protein                        | 0.999 |  | 3.8                             |   |       |  |  | 4,892.400  | 401.166   |
|          |              |           |                                                |       |  | EAPDDELPIVHYVYVQGRVQGFTR        | 3 | 0.999 |  |  |            |           |
|          |              |           |                                                |       |  | MARACLNLMAAMVTOGPEAARDVCSHFDLNK | 3 | 0.999 |  |  |            |           |
|          |              |           |                                                |       |  | MVLDTAEDLGGNEEAIVRLCRDIAATVPDI  | 3 | 0.999 |  |  |            |           |
| F1M2B6   | F1M2B6_BOVIN | Bt.20834  | Uncharacterized protein (Fragment)             | 0.999 |  | 5.5                             |   |       |  |  | 413.897    | 48.471    |
| F1N1X2   | F1N1X2_BOVIN | Bt.20834  | Uncharacterized protein (Fragment)             | 0.999 |  | 5.2                             |   |       |  |  | 413.897    | 48.471    |
|          |              |           |                                                |       |  | PGKGSFWTLHPDSGNMFGNCYLR         | 3 | 0.999 |  |  |            |           |
| P98133   | FBN1_BOVIN   | FBN1      | Fibrillin-1                                    | 0.999 |  | 0.8                             |   |       |  |  | 1,204.515  | 109.172   |
| F1M2C8   | F1M2C8_BOVIN | FBN1      | Uncharacterized protein                        | 0.999 |  | 0.8                             |   |       |  |  | 1,204.515  | 109.172   |
| F1N4K8   | F1N4K8_BOVIN | FBN1      | Uncharacterized protein                        | 0.999 |  | 0.8                             |   |       |  |  | 1,204.515  | 109.172   |
|          |              |           |                                                |       |  | GTCWQTVIDGRCEININGATLK          | 3 | 0.999 |  |  |            |           |
| Q76BS1   | HGF_BOVIN    | HGF       | Hepatocyte growth factor                       | 0.999 |  | 3.8                             |   |       |  |  | 1,588.902  | 124.812   |
| F1M2D6   | F1M2D6_BOVIN | HGF       | Uncharacterized protein                        | 0.999 |  | 3.8                             |   |       |  |  | 1,588.902  | 124.812   |
|          |              |           |                                                |       |  | LLPVLLOHVLHLPLLAIPYAEGQK        | 3 | 0.999 |  |  |            |           |
| F1M2D9   | F1M2D9_BOVIN | NUP50     | Uncharacterized protein                        | 0.999 |  | 2.8                             |   |       |  |  | 3,762.879  | 656.937   |
|          |              |           |                                                |       |  | NVGFESDGGGAFK                   | 3 | 0.999 |  |  |            |           |
| F1M2E7   | F1M2E7_BOVIN | TDRD1     | Uncharacterized protein (Fragment)             | 0.999 |  | 1.2                             |   |       |  |  | 3,090.824  | 913.990   |
|          |              |           |                                                |       |  | FLDHVLIEMGYGLK                  | 3 | 0.999 |  |  |            |           |
| F1M2F1   | F1M2F1_BOVIN | UPF0639   | Uncharacterized protein                        | 0.999 |  | 4.6                             |   |       |  |  | 1,876.080  | 178.221   |
|          |              |           |                                                |       |  | SNSVSPSPSLEEQASDSDALDISTK       | 3 | 0.999 |  |  |            |           |
| F1M2F2   | F1M2F2_BOVIN | DSC2      | Uncharacterized protein                        | 1.000 |  | 3.4                             |   |       |  |  | 2,969.354  | 291.208   |
|          |              |           |                                                |       |  | QLLTLTLLFACDACKVTTLHVPKLADEAK   | 3 | 0.999 |  |  |            |           |
| G3MYV6   | G3MYV6_BOVIN | NLRP13    | Uncharacterized protein                        | 0.999 |  | 2.6                             |   |       |  |  | 2,003.138  | 287.134   |
| F1M2G0   | F1M2G0_BOVIN | NLRP13    | Uncharacterized protein (Fragment)             | 0.999 |  | 3.2                             |   |       |  |  | 2,003.138  | 287.134   |
|          |              |           |                                                |       |  | PRGAGAPPLTMLLEGAAGVGKTLTATK     | 3 | 0.999 |  |  |            |           |
| F1M2J3   | F1M2J3_BOVIN | Bt.26710  | Uncharacterized protein                        | 0.999 |  | 4.8                             |   |       |  |  | 1,294.588  | 170.798   |
|          |              |           |                                                |       |  | VANGLAVMAIQSLHPCSELCKK          | 3 | 0.999 |  |  |            |           |
| F1M2L5   | F1M2L5_BOVIN | SPHKAP    | Uncharacterized protein (Fragment)             | 0.999 |  | 1.6                             |   |       |  |  | 2,609.025  | 287.351   |
|          |              |           |                                                |       |  | VVDSEMLNLEDIPDSVIFANEVAAK       | 3 | 0.999 |  |  |            |           |
| O48563-2 | VATH_BOVIN   | ATP6V1H   | Isoform Beta of V-type proton ATPase subunit f | 0.999 |  | 2.4                             |   |       |  |  | 1,155.040  | 130.654   |
| F1M2L6   | F1M2L6_BOVIN | ATP6V1H   | Uncharacterized protein                        | 0.999 |  | 2.4                             |   |       |  |  | 1,155.040  | 130.654   |
| F1M2L8   | F1M2L8_BOVIN | ATP6V1H   | Uncharacterized protein                        | 0.999 |  | 2.3                             |   |       |  |  | 1,155.040  | 130.654   |
| O46563   | VATH_BOVIN   | ATP6V1H   | V-type proton ATPase subunit f                 | 0.999 |  | 2.3                             |   |       |  |  | 1,155.040  | 130.654   |
|          |              |           |                                                |       |  | YDDEDISEDIK                     | 3 | 0.999 |  |  |            |           |
| F1M2M3   | F1M2M3_BOVIN | C9orf174  | Uncharacterized protein (Fragment)             | 0.999 |  | 2.0                             |   |       |  |  | 11,073.078 | 569.440   |
|          |              |           |                                                |       |  | VEEELVLDKSFETVAK                | 3 | 0.999 |  |  |            |           |
| F1M2M9   | F1M2M9_BOVIN | SPAM1     | Uncharacterized protein (Fragment)             | 0.999 |  | 4.0                             |   |       |  |  | 3,136.463  | 307.695   |
|          |              |           |                                                |       |  | INERTGVHKNNGGIPOVASLK           | 3 | 0.999 |  |  |            |           |
| F1M2N6   | F1M2N6_BOVIN | Bt.14715  | Uncharacterized protein (Fragment)             | 1.000 |  | 36.3                            |   |       |  |  | 72,136.718 | 5,682.213 |
|          |              |           |                                                |       |  | KVEALTFQHNFLTR                  | 2 | 0.980 |  |  |            |           |
|          |              |           |                                                |       |  | LLLSTVVGFLTAPGLHLK              | 3 | 1.000 |  |  |            |           |
|          |              |           |                                                |       |  | LPTLLGAEANLSK                   | 2 | 1.000 |  |  |            |           |
|          |              |           |                                                |       |  | LOAFLGVPGGGQGGTSR               | 2 | 1.000 |  |  |            |           |
|          |              |           |                                                |       |  | QPVQSLSSFPITLPR                 | 2 | 1.000 |  |  |            |           |
|          |              |           |                                                |       |  | QPVQSLSSFPITLPR                 | 3 | 0.932 |  |  |            |           |
|          |              |           |                                                |       |  | SLDLSTDPNLAAEK                  | 2 | 0.999 |  |  |            |           |
|          |              |           |                                                |       |  | SNCQDLKPSVETPPDPTFPVPIQTK       | 3 | 1.000 |  |  |            |           |
|          |              |           |                                                |       |  | SSAVDEEALWEQLVR                 | 2 | 1.000 |  |  |            |           |
|          |              |           |                                                |       |  | SSGALHFLGR                      | 2 | 0.996 |  |  |            |           |
|          |              |           |                                                |       |  | VLSSLOTIQLLVAQGGASSQAR          | 2 | 1.000 |  |  |            |           |
|          |              |           |                                                |       |  | VLSSLOTIQLLVAQGGASSQAR          | 3 | 1.000 |  |  |            |           |
|          |              |           |                                                |       |  | VSRPLSAE                        | 2 | 0.996 |  |  |            |           |
| F1M2P7   | F1M2P7_BOVIN | C11ORF9   | Uncharacterized protein (Fragment)             | 0.999 |  | 2.2                             |   |       |  |  | 1,973.239  | 248.816   |
|          |              |           |                                                |       |  | STGSAGFASHAGSOFSRAGSVPHKK       | 3 | 0.999 |  |  |            |           |
| F1M2P8   | F1M2P8_BOVIN |           | Uncharacterized protein (Fragment)             | 0.999 |  | 6.3                             |   |       |  |  | 2,689.771  | 247.780   |
|          |              |           |                                                |       |  | CKAAVLWELNKPFSIEEVEVAPPK        | 3 | 0.999 |  |  |            |           |
| F1M2Q1   | F1M2Q1_BOVIN | Bt.27902  | Uncharacterized protein (Fragment)             | 0.999 |  | 1.4                             |   |       |  |  | 3,239.805  | 304.543   |
|          |              |           |                                                |       |  | PIAPAPPSALSPPK                  | 3 | 0.999 |  |  |            |           |
| F1M2Q6   | F1M2Q6_BOVIN |           | Uncharacterized protein (Fragment)             | 0.999 |  | 6.3                             |   |       |  |  | 1,824.856  | 325.720   |
|          |              |           |                                                |       |  | RAVSGEDSORLDAHLTVK              | 3 | 0.999 |  |  |            |           |
| P17870   | ARRB1_BOVIN  | ARRB1     | Beta-arrestin-1                                | 0.999 |  | 4.3                             |   |       |  |  | 988.992    | 84.500    |
| P17870-2 | ARRB1_BOVIN  | ARRB1     | Isoform 1B of Beta-arrestin-1                  | 0.999 |  | 4.4                             |   |       |  |  | 988.992    | 84.500    |
| F1M2R6   | F1M2R6_BOVIN | ARRB1     | Uncharacterized protein (Fragment)             | 0.999 |  | 4.4                             |   |       |  |  | 988.992    | 84.500    |
|          |              |           |                                                |       |  | PGPQPTAETTRFLMSDK               | 3 | 0.999 |  |  |            |           |
| F1M2S0   | F1M2S0_BOVIN | CPNE7     | Uncharacterized protein                        | 0.999 |  | 2.1                             |   |       |  |  | 1,952.109  | 395.611   |
|          |              |           |                                                |       |  | VELRLSCRHLDR                    | 3 | 0.999 |  |  |            |           |
| F1M2T5   | F1M2T5_BOVIN | Bt.34394  | Uncharacterized protein (Fragment)             | 0.999 |  | 4.7                             |   |       |  |  | 6,772.712  | 4,157.085 |
|          |              |           |                                                |       |  | IIAYPRLGHLCGNVEKLR              | 3 | 0.999 |  |  |            |           |
| F1M2U0   | F1M2U0_BOVIN |           | Uncharacterized protein (Fragment)             | 0.999 |  | 1.1                             |   |       |  |  | 1,486.890  | 580.919   |
|          |              |           |                                                |       |  | NLNILMTSPTRPNFHONCR             | 3 | 0.999 |  |  |            |           |
| F1M2U2   | F1M2U2_BOVIN | NSF       | Uncharacterized protein                        | 0.999 |  | 1.9                             |   |       |  |  | 1,436.193  | 286.415   |
|          |              |           |                                                |       |  | MRGHQLLSADVDIK                  | 3 | 0.999 |  |  |            |           |
| F1M2U6   | F1M2U6_BOVIN | Bt.12794  | Uncharacterized protein                        | 0.999 |  | 1.2                             |   |       |  |  | 5,334.583  | 292.430   |
|          |              |           |                                                |       |  | GEPGLAMPGEPGAPLPGER             | 3 | 0.999 |  |  |            |           |
| F1M2V2   | F1M2V2_BOVIN | CHMP5     | Uncharacterized protein                        | 0.999 |  | 10.5                            |   |       |  |  | 1,890.171  | 224.343   |
|          |              |           |                                                |       |  | APPPLSDCIGTVDSRAESIDKK          | 3 | 0.999 |  |  |            |           |
| F1M2X2   | F1M2X2_BOVIN |           | Uncharacterized protein                        | 0.999 |  | 7.8                             |   |       |  |  | 2,344.946  | 298.358   |
|          |              |           |                                                |       |  | IEVSEDTGKASAATTAILIARSPPWVIVDR  | 3 | 0.999 |  |  |            |           |
| F1M2X3   | F1M2X3_BOVIN | CLSTN2    | Uncharacterized protein (Fragment)             | 0.999 |  | 2.8                             |   |       |  |  | 1,917.072  | 173.318   |
|          |              |           |                                                |       |  | ETILCNSDKTEMNRHHYALVHNCR        | 3 | 0.999 |  |  |            |           |
| F1M2X6   | F1M2X6_BOVIN | Bt.74518  | Uncharacterized protein                        | 0.999 |  | 0.7                             |   |       |  |  | 1,516.635  | 634.006   |
|          |              |           |                                                |       |  | KLSEQLLDASDR                    | 3 | 0.999 |  |  |            |           |
| F1M2Y6   | F1M2Y6_BOVIN | FIGN      | Uncharacterized protein (Fragment)             | 0.999 |  | 2.3                             |   |       |  |  | 3,632.608  | 326.036   |
|          |              |           |                                                |       |  | SILLFGRPTGKTLGLR                | 3 | 0.999 |  |  |            |           |
| F1N000   | F1N000_BOVIN | SRRM4     | Uncharacterized protein (Fragment)             | 0.999 |  | 3.9                             |   |       |  |  | 7,729.201  | 6,189.802 |
|          |              |           |                                                |       |  | PSPSSSSSLGSSSTSSWYSSSSSR        | 3 | 0.999 |  |  |            |           |
| F1N032   | F1N032_BOVIN | DENND4C   | Uncharacterized protein                        | 0.999 |  | 0.9                             |   |       |  |  | 18,573.333 | 4,945.651 |
|          |              |           |                                                |       |  | HISHFMQNIFFPSPQRPR              | 3 | 0.999 |  |  |            |           |
| F1N034   | F1N034_BOVIN | Bt.11292  | Uncharacterized protein                        | 1.000 |  | 2.6                             |   |       |  |  | 832.524    | 115.157   |
| G3N277   | G3N277_BOVIN | Bt.11292  | Uncharacterized protein                        | 1.000 |  | 2.3                             |   |       |  |  | 832.524    | 115.157   |
| QZNL05   | KIF2A_BOVIN  | KIF2A     | Kinesin-like protein KIF2f                     | 1.000 |  | 2.6                             |   |       |  |  | 832.524    | 115.157   |
|          |              |           |                                                |       |  | GKLGKFSLLDLGNER                 | 2 | 0.999 |  |  |            |           |
| F1N061   | F1N061_BOVIN | KIF7      | Uncharacterized protein                        | 1.000 |  | 3.3                             |   |       |  |  |            |           |



|        |              |           |                                           |       |                                  |   |       |  |  |             |            |
|--------|--------------|-----------|-------------------------------------------|-------|----------------------------------|---|-------|--|--|-------------|------------|
| F1N0A8 | F1N0A8_BOVIN | USP34     | Uncharacterized protein (Fragment)        | 0.999 | 1.1                              |   |       |  |  | 9,017,103   | 535,944    |
|        |              |           |                                           |       | FMDFSFKTHSAYMLFYKR               | 3 | 0.999 |  |  |             |            |
|        |              |           |                                           |       | PPRPELNMLCLPTMVETSK              | 3 | 0.999 |  |  |             |            |
| F1N0C3 | F1N0C3_BOVIN | Bt.58035  | Uncharacterized protein                   | 0.999 | 4.8                              |   |       |  |  | 849,706     | 78,779     |
| Q32PF0 | TM201_BOVIN  | TMEM201   | Transmembrane protein 201                 | 0.999 | 8.1                              |   |       |  |  | 849,706     | 78,779     |
|        |              |           |                                           |       | LREAWAFQSQSHQMGVVALGLTCLLMLLAGR  | 3 | 0.999 |  |  |             |            |
| F1N0D4 | F1N0D4_BOVIN | Bt.51583  | Protein phosphatase methylesterase        | 0.999 | 14.0                             |   |       |  |  | 5,804,221   | 384,017    |
| Q58DN4 | PPME1_BOVIN  | PPME1     | Protein phosphatase methylesterase        | 0.999 | 14.2                             |   |       |  |  | 5,804,221   | 384,017    |
|        |              |           |                                           |       | VYKSGSEGPVLLLLHGGHSALSVAWFTAAISR | 3 | 0.999 |  |  |             |            |
|        |              |           |                                           |       | YWDGWFRLSNLFLSCLPIPK             | 3 | 0.999 |  |  |             |            |
| F1N0E4 | F1N0E4_BOVIN | WDR49     | Uncharacterized protein (Fragment)        | 0.999 | 2.3                              |   |       |  |  | 1,521,869   | 143,096    |
|        |              |           |                                           |       | ELPEVKNKPAFLLDPEK                | 3 | 0.999 |  |  |             |            |
| F1N0H4 | F1N0H4_BOVIN | RAI14     | Uncharacterized protein (Fragment)        | 0.902 | 1.4                              |   |       |  |  | 38,216,767  | 2,397,054  |
|        |              |           |                                           |       | LSENAGIQLLSLK                    | 2 | 0.902 |  |  |             |            |
| F1N0H5 | F1N0H5_BOVIN | ZC3H13    | Uncharacterized protein                   | 1.000 | 1.2                              |   |       |  |  | 4,556,846   | 423,947    |
|        |              |           |                                           |       | EEDAMPSPDKDGALEDPPQK             | 3 | 0.999 |  |  |             |            |
| Q28107 | FA5_BOVIN    | F5        | Coagulation factor V                      | 0.986 | 0.5                              |   |       |  |  | 886,012     | 201,082    |
| F1N0J3 | F1N0J3_BOVIN | F5        | Uncharacterized protein                   | 0.986 | 0.6                              |   |       |  |  | 886,012     | 201,082    |
|        |              |           |                                           |       | ILNGEWHLVSEK                     | 2 | 0.979 |  |  |             |            |
| F1N0J0 | F1N0J0_BOVIN | Bt.24588  | Uncharacterized protein                   | 0.999 | 1.9                              |   |       |  |  | 1,080,981   | 148,796    |
| Q2NKY8 | DHX30_BOVIN  | DHX30     | Pulviate ATP-dependent RNA helicase DHX30 | 0.999 | 1.9                              |   |       |  |  | 1,080,981   | 148,796    |
|        |              |           |                                           |       | DTILNAIEQHPVVIAGDTGCGK           | 3 | 0.999 |  |  |             |            |
| F1N0J3 | F1N0J3_BOVIN | Bt.73262  | Uncharacterized protein (Fragment)        | 0.974 | 4.4                              |   |       |  |  | 3,807,088   | 461,484    |
|        |              |           |                                           |       | EHPITLAIGDGDANDVSMILEAHVIGVIGK   | 3 | 0.852 |  |  |             |            |
|        |              |           |                                           |       | SATGEIYLFCKGADSSIFPR             | 3 | 0.825 |  |  |             |            |
| Q28083 | COBA1_BOVIN  | COL11A1   | Collagen alpha-1(XI) chain (Fragment)     | 0.999 | 2.7                              |   |       |  |  | 1,238,377   | 125,313    |
| F1N0K0 | F1N0K0_BOVIN | COL11A1   | Uncharacterized protein                   | 0.999 | 1.4                              |   |       |  |  | 1,238,377   | 125,313    |
|        |              |           |                                           |       | PGLAGLPGADGPPGHPGKEGQSGEK        | 3 | 0.999 |  |  |             |            |
| F1N0K5 | F1N0K5_BOVIN | Bt.51566  | Uncharacterized protein                   | 0.999 | 12.0                             |   |       |  |  | 3,348,767   | 308,094    |
|        |              |           |                                           |       | VCCKMGLWSILCNQMMK                | 3 | 0.999 |  |  |             |            |
| F1N0L0 | F1N0L0_BOVIN | HECW1     | Uncharacterized protein (Fragment)        | 0.999 | 1.5                              |   |       |  |  | 1,107,762   | 152,289    |
|        |              |           |                                           |       | ELELVIAGTAEIDLADWRNNTEYR         | 3 | 0.999 |  |  |             |            |
| F1N0L2 | F1N0L2_BOVIN | Bt.89420  | Uncharacterized protein                   | 0.999 | 1.1                              |   |       |  |  | 4,908,167   | 442,023    |
|        |              |           |                                           |       | HGSSRVVMDLDDTDDGDNAPLFYQPGK      | 3 | 0.999 |  |  |             |            |
| F1N0M8 | F1N0M8_BOVIN | Bt.55376  | Uncharacterized protein (Fragment)        | 0.999 | 4.2                              |   |       |  |  | 1,155,178   | 230,361    |
| G3MXZ9 | G3MXZ9_BOVIN | Bt.55376  | Uncharacterized protein (Fragment)        | 0.999 | 6.5                              |   |       |  |  | 1,155,178   | 230,361    |
|        |              |           |                                           |       | PPSPPPIMHYSEHEAALLAEKLDKDSK      | 3 | 0.999 |  |  |             |            |
| F1N0Q1 | F1N0Q1_BOVIN |           | Uncharacterized protein (Fragment)        | 0.999 | 4.5                              |   |       |  |  | 2,715,769   | 224,213    |
| G3N382 | G3N382_BOVIN |           | Uncharacterized protein (Fragment)        | 0.999 | 3.5                              |   |       |  |  | 2,715,769   | 224,213    |
|        |              |           |                                           |       | KILLNCLCSFVTLRLDMIVAQR           | 3 | 0.999 |  |  |             |            |
| F1N0Q7 | F1N0Q7_BOVIN | FDPS      | Uncharacterized protein                   | 0.999 | 4.8                              |   |       |  |  | 2,878,401   | 785,552    |
|        |              |           |                                           |       | ILLEMGEFFQIQENYQKEAEK            | 3 | 0.999 |  |  |             |            |
|        |              |           |                                           |       | VLTEEDIGHPEIGDAITRLK             | 3 | 0.999 |  |  |             |            |
| F1N0R5 | F1N0R5_BOVIN |           | Uncharacterized protein                   | 0.999 | 1.0                              |   |       |  |  | 2,452,532   | 616,604    |
|        |              |           |                                           |       | VEEEVFVQQRNVSCPQLNVPCPLGFQLR     | 3 | 0.999 |  |  |             |            |
| F1N0S1 | F1N0S1_BOVIN | ASAP3     | Uncharacterized protein                   | 1.000 | 4.3                              |   |       |  |  | 4,950,532   | 328,783    |
|        |              |           |                                           |       | CGVKYGLTISHSTNR                  | 3 | 0.852 |  |  |             |            |
|        |              |           |                                           |       | SARQVPGRNVVMVGFPEGDGSR           | 3 | 0.999 |  |  |             |            |
| F1N0S9 | F1N0S9_BOVIN | Bt.61805  | Uncharacterized protein                   | 0.999 | 3.7                              |   |       |  |  | 2,566,175   | 287,609    |
|        |              |           |                                           |       | TISVAHLAARQDLKIFR                | 3 | 0.999 |  |  |             |            |
| F1N0V8 | F1N0V8_BOVIN | GLT25D2   | Uncharacterized protein                   | 1.000 | 6.2                              |   |       |  |  | 9,578,909   | 801,015    |
|        |              |           |                                           |       | IHRNAKTEALPPASLDTAPSR            | 3 | 0.999 |  |  |             |            |
|        |              |           |                                           |       | IVEAVDQKALNTSOLK                 | 3 | 0.999 |  |  |             |            |
| F1N0Y0 | F1N0Y0_BOVIN | UPP1      | Uncharacterized protein                   | 0.999 | 7.8                              |   |       |  |  | 2,471,050   | 374,240    |
|        |              |           |                                           |       | YVAMELGFAPHPGADYDYPNICEGTD       | 3 | 0.999 |  |  |             |            |
| F1N0Y5 | F1N0Y5_BOVIN | COLEC10   | Uncharacterized protein (Fragment)        | 0.999 | 4.6                              |   |       |  |  | 965,830     | 99,857     |
|        |              |           |                                           |       | GDPGEEGKLGK                      | 3 | 0.999 |  |  |             |            |
| F1N112 | F1N112_BOVIN | ATXN7     | Uncharacterized protein                   | 0.999 | 3.5                              |   |       |  |  | 4,760,753   | 1,140,539  |
|        |              |           |                                           |       | LPAVNNVHAKHVGPSPGAPGLTNSLLHOPK   | 3 | 0.999 |  |  |             |            |
| F1N121 | F1N121_BOVIN | Bt.62297  | Uncharacterized protein                   | 0.999 | 8.6                              |   |       |  |  | 2,282,043   | 564,723    |
|        |              |           |                                           |       | DTPNPPGIFSLRHAKESLVGATALS        | 3 | 0.999 |  |  |             |            |
|        |              |           |                                           |       | HFDTIQICLSPEVLGSPAGGGWHHTFOGR    | 3 | 0.999 |  |  |             |            |
| F1N134 | F1N134_BOVIN | Bt.51450  | Uncharacterized protein                   | 0.999 | 2.2                              |   |       |  |  | 3,088,801   | 812,085    |
|        |              |           |                                           |       | SFTASSSLRYHOR                    | 3 | 0.999 |  |  |             |            |
| F1N168 | F1N168_BOVIN | Bt.24923  | Uncharacterized protein (Fragment)        | 0.999 | 2.3                              |   |       |  |  | 3,265,421   | 349,563    |
|        |              |           |                                           |       | HYQGIDNPLDWELSYAYYSNIATK         | 3 | 0.999 |  |  |             |            |
| F1N169 | F1N169_BOVIN | FLNA      | Uncharacterized protein                   | 0.999 | 0.8                              |   |       |  |  | 9,296,554   | 3,222,864  |
|        |              |           |                                           |       | KPVKHTAMVSWGVSIPNSPFR            | 3 | 0.999 |  |  |             |            |
| F1N1B0 | F1N1B0_BOVIN | Bt.16810  | Uncharacterized protein (Fragment)        | 0.999 | 4.3                              |   |       |  |  | 2,701,788   | 1,225,854  |
|        |              |           |                                           |       | KQAAQAAEAGGR                     | 3 | 0.999 |  |  |             |            |
| F1N1C9 | F1N1C9_BOVIN | BRWD3     | Uncharacterized protein (Fragment)        | 0.999 | 1.1                              |   |       |  |  | 15,791,542  | 10,755,859 |
|        |              |           |                                           |       | QDHSIDGPLTNGDGREPR               | 3 | 0.999 |  |  |             |            |
| F1N1D3 | F1N1D3_BOVIN | FAM184B   | Uncharacterized protein (Fragment)        | 0.999 | 2.1                              |   |       |  |  | 2,917,950   | 286,324    |
| G3MYE6 | G3MYE6_BOVIN | FAM184B   | Uncharacterized protein (Fragment)        | 0.999 | 1.9                              |   |       |  |  | 2,917,950   | 286,324    |
|        |              |           |                                           |       | GGTDTQTKKEACIETMYK               | 3 | 0.999 |  |  |             |            |
| F1N1D9 | F1N1D9_BOVIN |           | Uncharacterized protein (Fragment)        | 0.999 | 5.1                              |   |       |  |  | 1,928,608   | 179,116    |
|        |              |           |                                           |       | RISHWQKCVDCNDSYFD                | 3 | 0.999 |  |  |             |            |
| F1N1F8 | F1N1F8_BOVIN | Bt.47594  | Uncharacterized protein                   | 0.999 | 0.6                              |   |       |  |  | 1,043,329   | 153,396    |
|        |              |           |                                           |       | AYGELQQKAEFSQKHEK                | 3 | 0.999 |  |  |             |            |
| F1N1I4 | F1N1I4_BOVIN | Bt.37390  | Uncharacterized protein                   | 0.999 | 4.8                              |   |       |  |  | 4,976,350   | 313,104    |
|        |              |           |                                           |       | TPRSIRGAQSAEESGAQNR              | 3 | 0.999 |  |  |             |            |
| F1N1K5 | F1N1K5_BOVIN | KPNA5     | Uncharacterized protein (Fragment)        | 0.999 | 4.1                              |   |       |  |  | 1,958,808   | 183,419    |
|        |              |           |                                           |       | LLSKEPNPPIDVQIKPGVWQR            | 3 | 0.999 |  |  |             |            |
| F1N1K6 | F1N1K6_BOVIN | 617212    | Uncharacterized protein (Fragment)        | 1.000 | 1.0                              |   |       |  |  | 209,366,001 | 7,870,742  |
|        |              |           |                                           |       | ELAASVYGGPVGDDKDR                | 3 | 0.999 |  |  |             |            |
|        |              |           |                                           |       | LKGHSSTVLGDTLLCSAAINLGFPPVPR     | 3 | 0.999 |  |  |             |            |
| F1N1K7 | F1N1K7_BOVIN | Bt.56498  | Uncharacterized protein (Fragment)        | 1.000 | 2.3                              |   |       |  |  | 776,263     | 98,012     |
|        |              |           |                                           |       | PFLNRTHEHFHIFISFAR               | 3 | 0.999 |  |  |             |            |
| F1N1K9 | F1N1K9_BOVIN | TGS1      | Uncharacterized protein                   | 0.916 | 2.1                              |   |       |  |  | 749,009     | 96,508     |
|        |              |           |                                           |       | HRSGLTDGDESDDPPEEK               | 3 | 0.807 |  |  |             |            |
| F1N1L7 | F1N1L7_BOVIN | Bt.77848  | Uncharacterized protein                   | 0.999 | 1.7                              |   |       |  |  | 926,390     | 93,853     |
|        |              |           |                                           |       | QPCILLMDSLRGPRSRNVVK             | 3 | 0.999 |  |  |             |            |
| F1N1N4 | F1N1N4_BOVIN | LOC523023 | Uncharacterized protein (Fragment)        | 0.999 | 6.8                              |   |       |  |  | 1,196,812   | 138,876    |
|        |              |           |                                           |       | HNVAIKVSTAEAPAEFSR               | 3 | 0.999 |  |  |             |            |
| F1N1N8 | F1N1N8_BOVIN | GJB5      | Uncharacterized protein                   | 0.999 | 8.1                              |   |       |  |  | 2,234,754   | 477,511    |
|        |              |           |                                           |       | MNWGIFEGLLSGANKYSTAFGR           | 3 | 0.999 |  |  |             |            |
| F1N1N9 | F1N1N9_BOVIN | HERC5     | Uncharacterized protein                   | 0.999 | 4.8                              |   |       |  |  | 8,330,754   | 1,785,556  |
|        |              |           |                                           |       | KSYFFFLGCLGLSLFNCNADIPPLALFK     | 3 | 0.999 |  |  |             |            |
|        |              |           |                                           |       | PVPGRVSESPPPASR                  | 3 | 0.999 |  |  |             |            |
| F1N1Q8 | F1N1Q8_BOVIN | LNPEP     | Uncharacterized protein (Fragment)        | 0.999 | 1.6                              |   |       |  |  | 31,855,500  | 1,004,366  |
|        |              |           |                                           |       | LLDFYQSYFEIQYPLK                 | 3 | 0.999 |  |  |             |            |
| F1N1R4 | F1N1R4_BOVIN | DIS3      | Uncharacterized protein                   | 0.999 | 2.9                              |   |       |  |  | 2,644,983   | 264,949    |
|        |              |           |                                           |       | ETETEVLLEHDVPHQAFSOAVLSFLPK      | 3 | 0.999 |  |  |             |            |
| F1N1R6 | F1N1R6_BOVIN | PDGFRL    | Uncharacterized protein                   | 0.999 | 9.9                              |   |       |  |  | 22,408,113  | 2,197,665  |
|        |              |           |                                           |       | DRDSADTPKTPSMITQMMDK             | 3 | 0.999 |  |  |             |            |
|        |              |           |                                           |       | RDEAKTGSTYIFTEK                  | 3 | 0.999 |  |  |             |            |
| F1N1U5 | F1N1U5_BOVIN | FEV       | Uncharacterized protein                   | 0.999 | 13.0                             |   |       |  |  | 1,166,905   | 163,801    |
|        |              |           |                                           |       | SPGWGLSPAQVQKSGGQIQLWQFLELLADR   | 3 | 0.999 |  |  |             |            |
| F1N1U9 | F1N1U9_BOVIN |           | Uncharacterized protein (Fragment)        | 0.999 | 5.2                              |   |       |  |  | 686,915     | 121,273    |
|        |              |           |                                           |       | SFCSNSYPIHYSRTHMGVNLYKCNEGGK     | 3 | 0.999 |  |  |             |            |
| Q2KH22 | HBS1L_BOVIN  | HBS1L     | HBS1-like protein                         | 0.961 | 4.5                              |   |       |  |  | 6,216,606   | 746,240    |
| F1N1V0 | F1N1V0_BOVIN | HBS1L     | Uncharacterized protein                   | 0.961 | 4.5                              |   |       |  |  | 6,216,606   | 746,240    |
|        |              |           |                                           |       | FDVQKALSIVLEQDK                  | 3 | 0.805 |  |  |             |            |
|        |              |           |                                           |       | YSGSTIAAGVTEIKD                  | 3 | 0.801 |  |  |             |            |
| F1N1V3 | F1N1V3_BOVIN | Bt.8231   | Uncharacterized protein                   | 0.999 | 1.2                              |   |       |  |  | 4,956,000   | 528,902    |
|        |              |           |                                           |       | AVQHCALLNLTLQKENLFMDLLR          | 3 | 0.999 |  |  |             |            |
| F1N1Z2 | F1N1Z2_BOVIN | Bt.44956  | Uncharacterized protein (Fragment)        | 0.999 | 1.4                              |   |       |  |  | 1,920,700   | 278,988    |
| F1N6I3 | F1N6I3_BOVIN | LOC511121 | Uncharacterized protein                   | 0.999 | 3.3                              |   |       |  |  | 1,920,700   | 278,988    |
|        |              |           |                                           |       | GPAGSLKSVVAILEESTEK              | 3 | 0.999 |  |  |             |            |
| F1N205 | F1N205_BOVIN | Bt.73030  | Uncharacterized protein                   | 0.999 | 3.6                              |   |       |  |  | 1,993,538   | 187,055    |
|        |              |           |                                           |       | LRQSGNNVIADIMK                   | 3 | 0.999 |  |  |             |            |
| F1N213 | F1N213_BOVIN | GRM6      | Uncharacterized protein (Fragment)        | 0.999 | 2.1                              |   |       |  |  | 4,970,117   | 318,835    |
|        |              |           |                                           |       | EVPELCSLPCGGERKK                 | 3 | 0.999 |  |  |             |            |
| F1N235 | F1N235_BOVIN | Bt.46987  | Uncharacterized protein                   | 0.999 | 7.7                              |   |       |  |  | 29,974,125  | 3,210,734  |
|        |              |           |                                           |       | GGCSGGSADGYDEGFRACYDNYGGR        | 3 | 0.999 |  |  |             |            |

|          |              |           |                                                            |       |      |                               |           |         |
|----------|--------------|-----------|------------------------------------------------------------|-------|------|-------------------------------|-----------|---------|
| F1N264   | F1N264_BOVIN | ZEB1      | Uncharacterized protein (Fragment)                         | 0.999 | 2.3  |                               | 4,394,897 | 223,456 |
| F1N283   | F1N283_BOVIN | C3orf21   | Uncharacterized protein                                    | 0.999 | 7.1  | FSHSGSYSHSSKICISLMPVNGR       | 3         | 0.999   |
| F1N2D3   | F1N2D3_BOVIN | ZO1       | Uncharacterized protein (Fragment)                         | 1.000 | 1.4  | AGAPAAPSPVLELARGSLAPAGAKAK    | 3         | 0.999   |
| F1N2D5   | F1N2D5_BOVIN | IDS       | Uncharacterized protein                                    | 0.999 | 5.1  | AEQLASVQYTLPKTAGGDRADFWR      | 3         | 0.999   |
| F1N2G6   | F1N2G6_BOVIN | TAS2R42   | Taste receptor type 2                                      | 0.999 | 9.0  | PDITRLYDFNSYWRVHAGNFSTIPQYFK  | 3         | 0.999   |
| F1N2H2   | F1N2H2_BOVIN | Bt.103205 | Uncharacterized protein                                    | 0.999 | 1.5  | AMKIVMSFLFLFIHVSILLIIVWFLK    | 3         | 0.999   |
| F1N2J4   | F1N2J4_BOVIN | ST8SIA5   | Uncharacterized protein (Fragment)                         | 0.999 | 6.7  | LAESKVSIVTEASADSSKTDK         | 3         | 0.999   |
| Q2HJ8    | RAB8B_BOVIN  | RAB8B     | Ras-related protein Rab-8E                                 | 0.999 | 13.5 | PRPGFHAMPSEIFNFLHLHSRGLR      | 3         | 0.999   |
| F1N2J9   | F1N2J9_BOVIN | RAB8B     | Uncharacterized protein                                    | 0.999 | 13.5 | FSEDAFNTTISTIGIDFKIRTIELDGK   | 3         | 0.999   |
| F1N2M5   | F1N2M5_BOVIN | ALPI      | Alkaline phosphatase                                       | 0.999 | 4.1  |                               |           |         |
| P19111   | PPBI_BOVIN   | ALPI      | Intestinal-type alkaline phosphatase                       | 0.999 | 4.1  |                               |           |         |
| F1N6T5   | F1N6T5_BOVIN | Bt.102548 | Alkaline phosphatase                                       | 0.999 | 4.1  |                               |           |         |
| F1N2N3   | F1N2N3_BOVIN | C6orf146  | Uncharacterized protein (Fragment)                         | 0.999 | 4.2  | NVILFLDGMGVPTVTATRIK          | 3         | 0.999   |
| F1N2N9   | F1N2N9_BOVIN | LOC617306 | Uncharacterized protein                                    | 0.999 | 3.3  | LALSKSDSWKMTVEIPDSSLEPLMAR    | 3         | 0.999   |
| F1N2Q0   | F1N2Q0_BOVIN | LOC617696 | Uncharacterized protein (Fragment)                         | 1.000 | 8.3  | VSSSRRLVTRQPSQVPGSIMSHR       | 3         | 0.999   |
|          |              |           |                                                            |       |      | DSSTWLTAFVLK                  | 2         | 0.923   |
|          |              |           |                                                            |       |      | FGLLGEDGEK                    | 2         | 0.965   |
|          |              |           |                                                            |       |      | GSFDFPVGDAISK                 | 2         | 0.998   |
|          |              |           |                                                            |       |      | LEELQFSLGSK                   | 2         | 1.000   |
|          |              |           |                                                            |       |      | LGQYTPVAK                     | 2         | 0.988   |
|          |              |           |                                                            |       |      | LLLPDSLTTWEIHGVLSK            | 3         | 1.000   |
|          |              |           |                                                            |       |      | LQDAPSGQVVR                   | 2         | 0.999   |
|          |              |           |                                                            |       |      | LVDGQCQISLQK                  | 2         | 1.000   |
|          |              |           |                                                            |       |      | PVGFVSVPIAAAVSLK              | 2         | 0.998   |
|          |              |           |                                                            |       |      | SFFPENLWVK                    | 2         | 0.985   |
|          |              |           |                                                            |       |      | TLEIPGNSDPNIPEGDFK            | 2         | 1.000   |
| F1N2S0   | F1N2S0_BOVIN | Bt.50945  | Uncharacterized protein                                    | 0.999 | 16.4 | AHNLSSVCWEQCRPEEPGHCAVQSEVVK  | 3         | 0.999   |
| F1N2V0   | F1N2V0_BOVIN | CRB2      | Uncharacterized protein                                    | 0.999 | 2.3  |                               |           |         |
| G3MYX7   | G3MYX7_BOVIN | CRB2      | Uncharacterized protein (Fragment)                         | 0.999 | 2.5  | LWHEDCPAHLCVASSPMATAAPAPTAGSR | 3         | 0.999   |
| F1N2W4   | F1N2W4_BOVIN | ASXL2     | Uncharacterized protein (Fragment)                         | 0.999 | 1.6  | SPGVETVMKPTVEASPOETTMK        | 3         | 0.999   |
| F1N2W5   | F1N2W5_BOVIN | DGKI      | Uncharacterized protein (Fragment)                         | 0.999 | 3.3  | TLNWGGGYTDEPVSKLQVEDGTVQLDR   | 3         | 0.999   |
| F1N2W9   | F1N2W9_BOVIN | Bt.46069  | Uncharacterized protein                                    | 0.944 | 1.8  |                               |           |         |
| F1N2X1   | F1N2X1_BOVIN | SLC12A6   | Uncharacterized protein                                    | 0.999 | 1.5  | GESHLLVGDPTGKSKQFLK           | 3         | 0.809   |
| F1N2Y2   | F1N2Y2_BOVIN | COL5A2    | Uncharacterized protein                                    | 0.999 | 1.7  | IDDIPGLSDTSPDLSSR             | 3         | 0.999   |
| F1N300   | F1N300_BOVIN | Bt.76801  | Condensin complex subunit 1 (Fragment)                     | 1.000 | 1.8  | AQEEDEDEGYGEEIACQNGQMYLNR     | 3         | 0.999   |
| F1N3G4   | F1N3G4_BOVIN | NCAPD2    | Condensin complex subunit 1                                | 1.000 | 1.7  |                               |           |         |
|          |              |           |                                                            |       |      | GOVSEMAVLLIDPAPQIAALAK        | 3         | 0.999   |
|          |              |           |                                                            |       |      | VKGQVSEMAVLLIDPAPQIAALAK      | 3         | 0.999   |
| F1N303   | F1N303_BOVIN | ADAMTS19  | Uncharacterized protein (Fragment)                         | 0.999 | 1.4  | PSPGPGVPTREAAAPR              | 3         | 0.999   |
| F1N307   | F1N307_BOVIN | TTC21A    | Uncharacterized protein                                    | 0.937 | 0.8  |                               |           |         |
| F1N329   | F1N329_BOVIN | Bt.56498  | Uncharacterized protein                                    | 1.000 | 3.9  | AYEYMGFIMER                   | 3         | 0.806   |
|          |              |           |                                                            |       |      | PFLNRTTEHFHFISFAR             | 3         | 0.999   |
|          |              |           |                                                            |       |      | RELATSAPVRPAPASSEIMASAAK      | 3         | 0.999   |
| P13608   | PGCA_BOVIN   | ACAN      | Aggrecan core protein                                      | 0.999 | 1.0  |                               |           |         |
| P13608-2 | PGCA_BOVIN   | ACAN      | Isoform 2 of Aggrecan core protein                         | 0.999 | 1.0  |                               |           |         |
| F1N491   | F1N491_BOVIN | Bt.4953   | Uncharacterized protein                                    | 0.999 | 1.1  |                               |           |         |
| F1N367   | F1N367_BOVIN | Bt.92700  | Uncharacterized protein                                    | 0.999 | 1.0  |                               |           |         |
| F1N368   | F1N368_BOVIN | Bt.92700  | Uncharacterized protein                                    | 0.999 | 1.0  |                               |           |         |
| Q2T9M0   | CD047_BOVIN  |           | UPF0602 protein C4orf47 homolog                            | 0.999 | 5.5  | PPFSEPPFPSEEPSTLSAPVPSR       | 3         | 0.999   |
| F1N3A8   | F1N3A8_BOVIN | MGC133696 | Uncharacterized protein                                    | 0.999 | 5.5  |                               |           |         |
| F1N3C5   | F1N3C5_BOVIN | TBC1D5    | Uncharacterized protein (Fragment)                         | 0.999 | 1.5  | PIESIMALNVKRALNMK             | 3         | 0.999   |
| F1N3C8   | F1N3C8_BOVIN | HIRA      | Uncharacterized protein (Fragment)                         | 0.999 | 1.9  | RIPTLWFLASRK                  | 3         | 0.999   |
| F1N3D1   | F1N3D1_BOVIN |           | Uncharacterized protein                                    | 0.999 | 0.8  | PRDLVLESSDSDKAPAAK            | 3         | 0.999   |
| F1N3E9   | F1N3E9_BOVIN | Bt.57515  | Uncharacterized protein (Fragment)                         | 0.999 | 4.3  | YGVGYTYTAVLDK                 | 3         | 0.999   |
| F1N3H6   | F1N3H6_BOVIN | DPY19L1   | Uncharacterized protein                                    | 0.999 | 2.7  | WAVGGVIAVLVAFATAMIMGFLQK      | 3         | 0.999   |
| F1N3I8   | F1N3I8_BOVIN | LOC784417 | Uncharacterized protein                                    | 0.999 | 4.9  | YSTKPDVAVFAGAMPTMASVK         | 3         | 0.999   |
| F1N3L2   | F1N3L2_BOVIN | ABCG5     | Uncharacterized protein                                    | 0.999 | 4.2  | CLKPWIGTGLLLLEGQTFQHR         | 3         | 0.999   |
| F1N3M8   | F1N3M8_BOVIN | Bt.43028  | Uncharacterized protein (Fragment)                         | 0.999 | 1.0  | TGTLTGEVFNQELHR               | 3         | 0.999   |
| F1N3N1   | F1N3N1_BOVIN |           | Uncharacterized protein (Fragment)                         | 0.999 | 3.0  | TTLDAMSGR                     | 3         | 0.999   |
| F1N3P6   | F1N3P6_BOVIN | SLC15A5   | Uncharacterized protein                                    | 0.999 | 2.9  | PRYTEERESTFLDEGPDDEQEGR       | 3         | 0.999   |
| F1N3R3   | F1N3R3_BOVIN | LOC618552 | Uncharacterized protein                                    | 0.999 | 10.1 | EGLNENSHLOQSLK                | 3         | 0.999   |
| Q0VCA3   | LETM1_BOVIN  | LETM1     | LETM1 and EF-hand domain-containing protein 1, mitochondri | 1.000 | 8.1  | LFHVALLAVCLGTGGIR             | 3         | 0.999   |
| F1N3R4   | F1N3R4_BOVIN | LETM1     | Uncharacterized protein                                    | 1.000 | 8.1  | APQFLKSGMSDONPK               | 3         | 0.999   |
|          |              |           |                                                            |       |      | VAEVEGEQVDNKALEATLOEEAAIQQEHR | 3         | 0.999   |
| F1N3S5   | F1N3S5_BOVIN | USP32     | Uncharacterized protein (Fragment)                         | 0.999 | 1.3  | VIELVDKEDVHISTSOVAEIVATLEKEEK | 3         | 0.999   |
| F1N3U7   | F1N3U7_BOVIN | BPTF      | Uncharacterized protein (Fragment)                         | 0.999 | 0.9  | DSDGRPDWEAAEAWDNHLR           | 3         | 0.999   |
| F1N3W8   | F1N3W8_BOVIN | Bt.105456 | Uncharacterized protein (Fragment)                         | 0.999 | 4.0  | FEDFCAALVSQEQCTLMAEMHVLLK     | 3         | 0.999   |
| F1N3Y9   | F1N3Y9_BOVIN | ZNF771    | Uncharacterized protein                                    | 0.999 | 7.0  | NLTLDPKWNQHYDLYGKSDSVTSVWNHK  | 3         | 0.999   |
| F1N401   | F1N401_BOVIN | COL12A1   | Uncharacterized protein                                    | 0.914 | 0.6  | LYICAGCGRDFKLPAGATATER        | 3         | 0.999   |
| F1N415   | F1N415_BOVIN | PCLO      | Uncharacterized protein                                    | 0.976 | 0.6  | KIPYKGGNTMTGEAIDYLIK          | 3         | 0.800   |
|          |              |           |                                                            |       |      | DDMTESTVDFDR                  | 3         | 0.805   |
|          |              |           |                                                            |       |      | TIPQGPAPKPLAQQLGTAK           | 3         | 0.803   |
| Q8WMY2   | FPPS_BOVIN   | FPPS      | Farnesyl pyrophosphate synthase                            | 0.999 | 5.7  |                               |           |         |
| F1N431   | F1N431_BOVIN | FPPS      | Uncharacterized protein                                    | 0.999 | 4.8  |                               |           |         |
| G3MZT9   | G3MZT9_BOVIN | FPPS      | Uncharacterized protein (Fragment)                         | 0.999 | 6.1  |                               |           |         |
| F1N439   | F1N439_BOVIN | STXBP5L   | Uncharacterized protein                                    | 0.999 | 2.2  | VLTEEDIGHPEIGDAITRLK          | 3         | 0.999   |
|          |              |           |                                                            |       |      | HEITTEIVSLEVR                 | 3         | 0.999   |
|          |              |           |                                                            |       |      | TVLLSMGTIDLYR                 | 3         | 0.999   |
| F1N451   | F1N451_BOVIN | GRHL3     | Uncharacterized protein (Fragment)                         | 0.999 | 3.2  |                               |           |         |
| F1N461   | F1N461_BOVIN | GNAL      | Uncharacterized protein                                    | 0.999 | 6.8  | GVPLNLQIDTYDCGSGTER           | 3         | 0.999   |
| F1N471   | F1N471_BOVIN | Bt.55793  | Uncharacterized protein (Fragment)                         | 0.999 | 2.5  | KWIOCFNDVTAIYVAAACSSYNMVR     | 3         | 0.999   |
|          |              |           |                                                            |       |      | IHKSHIGERHYECNECGK            | 3         | 0.999   |

|          |              |              |                                                           |       |      |                                   |   |           |            |           |
|----------|--------------|--------------|-----------------------------------------------------------|-------|------|-----------------------------------|---|-----------|------------|-----------|
| F1N480   | F1N480_BOVIN | BL16805      | Uncharacterized protein (Fragment)                        | 1.000 | 2.7  |                                   |   | 4,931,454 | 836,545    |           |
| F1N482   | F1N482_BOVIN | RGNEF        | Uncharacterized protein (Fragment)                        | 0.999 | 3.7  | DAFNSFERLKNESR                    | 3 | 0.999     | 4,136,679  | 575,871   |
|          |              |              |                                                           |       |      | GMFLISASSAGPEMIEHTNSKEER          | 3 | 0.999     |            |           |
|          |              |              |                                                           |       |      | LVLQQRESLAPGPAFRGSPFQDEK          | 3 | 0.999     |            |           |
| Q3S222   | RM46_BOVIN   | MRPL46       | 39S ribosomal protein L46, mitochondria                   | 0.999 | 5.8  |                                   |   |           | 1,046,858  | 131,063   |
| F1N499   | F1N499_BOVIN | MRPL46       | Uncharacterized protein                                   | 0.999 | 5.8  |                                   |   |           | 1,046,858  | 131,063   |
| O02786   | MSX1_BOVIN   | MSX1         | Homeobox protein MSX-1                                    | 0.999 | 7.7  | FLQFKPGARITDADVK                  | 3 | 0.999     | 4,004,785  | 429,177   |
| F1N4A2   | F1N4A2_BOVIN | MSX1         | Uncharacterized protein                                   | 0.999 | 7.6  |                                   |   |           | 4,004,785  | 429,177   |
| F1N4A6   | F1N4A6_BOVIN | LOC100335265 | Uncharacterized protein                                   | 0.999 | 1.4  | QYLSIAERAIEFSSLSLTETQVK           | 3 | 0.999     | 3,099,625  | 301,638   |
| F1N4C5   | F1N4C5_BOVIN | PLXND1       | Uncharacterized protein (Fragment)                        | 0.931 | 1.1  | MIVTQPKGIGSTVQPAK                 | 3 | 0.999     | 1,554,344  | 111,961   |
| F1N4C7   | F1N4C7_BOVIN | BL64782      | Uncharacterized protein (Fragment)                        | 0.999 | 1.9  | QIMSALEANPTARRTLQHK               | 3 | 0.895     | 1,332,807  | 166,403   |
| F1N4F8   | F1N4F8_BOVIN | BL59510      | Uncharacterized protein                                   | 0.999 | 4.2  | LTDVPNPNPHESKPWYDGLSR             | 3 | 0.999     | 1,202,535  | 218,010   |
| F1N4G6   | F1N4G6_BOVIN | FAM70B       | Uncharacterized protein (Fragment)                        | 0.999 | 7.7  | EPDAFDLDVLGEALQSSRDTPARR          | 3 | 0.999     | 1,700,769  | 256,672   |
| F1N4I1   | F1N4I1_BOVIN | BL45632      | Uncharacterized protein (Fragment)                        | 0.999 | 1.8  | PRPPAICTSSYPFLPLQPGAFASR          | 3 | 0.999     | 4,808,193  | 392,297   |
| F1N4J2   | F1N4J2_BOVIN | SACS         | Uncharacterized protein (Fragment)                        | 0.999 | 0.4  | IPDAFLFRPSWAIPKPIQLPMPAAFTIR      | 3 | 0.999     | 4,985,579  | 271,566   |
|          |              |              |                                                           |       |      | YIFTANKKCK                        | 1 | 0.999     |            |           |
| F1N4J5   | F1N4J5_BOVIN | TESK2        | Uncharacterized protein                                   | 0.999 | 4.7  | TRPFDNLQDELQHLK                   | 3 | 0.999     | 4,411,350  | 357,825   |
| F1N4K1   | F1N4K1_BOVIN | PFAS         | Uncharacterized protein                                   | 0.999 | 1.1  | ASAQPAAPAHEAMDCSNQAQENGFGR        | 3 | 0.999     | 8,526,296  | 801,551   |
| F1N4M5   | F1N4M5_BOVIN | Bt.20386     | Uncharacterized protein                                   | 0.999 | 2.3  | CPVCFVGTITGDRR                    | 3 | 0.999     | 2,183,710  | 267,289   |
| F1N4N1   | F1N4N1_BOVIN | BL31916      | Uncharacterized protein                                   | 0.956 | 3.7  | IPFEYWSSSYSAADNRVMAQQAQSVDR       | 3 | 0.999     | 22,930,146 | 777,527   |
| F1N4P1   | F1N4P1_BOVIN | BL7174       | Uncharacterized protein (Fragment)                        | 0.999 | 6.5  | IEELENLLQQGGPIAGTDHDK             | 3 | 0.823     | 1,295,382  | 191,430   |
| G3MZX9   | G3MZX9_BOVIN |              | Uncharacterized protein                                   | 0.999 | 5.3  | FAFLFNNEVLCDVHFLVKGGLGAORIPAHR    | 3 | 0.999     | 4,271,852  | 545,450   |
| F1N4Q9   | F1N4Q9_BOVIN |              | Uncharacterized protein (Fragment)                        | 0.999 | 7.3  | TEDLDAGHPSSDDYAEALSVEEDEDQRGR     | 3 | 0.999     | 4,271,852  | 545,450   |
| F1N4S9   | F1N4S9_BOVIN | KLB          | Uncharacterized protein (Fragment)                        | 0.999 | 2.4  | DIQLQDITCLSSPTRLAVMPWGER          | 3 | 0.999     | 1,080,807  | 159,593   |
| F1N4T0   | F1N4T0_BOVIN | KCNT2        | Uncharacterized protein (Fragment)                        | 0.999 | 2.5  | SLPLWGLQVLVALISLIFETILLGYLSYK     | 3 | 0.999     | 3,311,942  | 404,236   |
| F1N4V5   | F1N4V5_BOVIN | BL68720      | Uncharacterized protein                                   | 0.999 | 2.7  | VDYSEYSELYLQNVLRAGLYR             | 3 | 0.999     | 1,339,811  | 229,627   |
| Q0IH7    | ST14_BOVIN   | ST14         | Suppressor of tumorigenicity 14 protein homolog           | 0.999 | 4.2  |                                   |   |           | 3,151,544  | 505,063   |
| F1N4X7   | F1N4X7_BOVIN | ST14         | Uncharacterized protein                                   | 0.999 | 4.2  |                                   |   |           | 3,151,544  | 505,063   |
| F1N507   | F1N507_BOVIN | BTA1         | Uncharacterized protein (Fragment)                        | 0.999 | 1.0  | FKAFLQEPNVPVGSCTK                 | 3 | 0.999     | 1,775,099  | 419,657   |
| F1N510   | F1N510_BOVIN | CBLB         | Uncharacterized protein                                   | 1.000 | 5.7  | RGAGSGDLGAGFKYTSR                 | 3 | 0.999     | 7,340,717  | 405,411   |
|          |              |              |                                                           |       |      | SSSREQAQVLAAMDALHR                | 3 | 0.999     |            |           |
|          |              |              |                                                           |       |      | ASQDYDPLPSSSDGSAQAPRPPK           | 3 | 0.999     |            |           |
|          |              |              |                                                           |       |      | LAQLSENYFKYIDSLMK                 | 3 | 0.999     |            |           |
|          |              |              |                                                           |       |      | RALEIAQNNVEVAR                    | 3 | 0.832     |            |           |
| F1N521   | F1N521_BOVIN | Bt.63256     | Uncharacterized protein                                   | 0.999 | 4.7  | FOLVISKAPSGDLLDKHSEHFSNR          | 3 | 0.999     | 1,042,236  | 86,245    |
| F1N529   | F1N529_BOVIN | SERPIN2      | Uncharacterized protein                                   | 0.999 | 4.8  | GNTADGIAQVLFQNOVGVHR              | 3 | 0.999     | 4,130,883  | 427,277   |
| F1N534   | F1N534_BOVIN | TBC1D24      | Uncharacterized protein                                   | 0.999 | 5.8  |                                   |   |           | 1,092,873  | 233,548   |
| F1N549   | F1N549_BOVIN | BT2424       | Uncharacterized protein                                   | 0.999 | 2.6  | HFNLPSKTESLTMAGGSDCLIHLAGRWR      | 3 | 0.999     | 503,907    | 82,445    |
| Q28007   | DPYD_BOVIN   | DPYD         | Dihydropyrimidine dehydrogenase [NADP+]                   | 0.999 | 2.6  | AFEAGWAFALTKTFSLSLKDIVTNVSPR      | 3 | 0.999     | 503,907    | 82,445    |
| Q3ZC82-2 | ZC3HE_BOVIN  | ZC3H14       | Isoform 2 of Zinc finger CCH domain-containing protein 1- | 1.000 | 2.5  |                                   |   |           | 1,711,394  | 1,253,030 |
| F1N565   | F1N565_BOVIN | ZC3H14       | Uncharacterized protein (Fragment)                        | 1.000 | 2.6  |                                   |   |           | 1,711,394  | 1,253,030 |
| F1N567   | F1N567_BOVIN | ZC3H14       | Uncharacterized protein (Fragment)                        | 1.000 | 2.1  |                                   |   |           | 1,711,394  | 1,253,030 |
| Q3ZC82   | ZC3HE_BOVIN  | ZC3H14       | Zinc finger CCH domain-containing protein 1-              | 1.000 | 2.0  |                                   |   |           | 1,711,394  | 1,253,030 |
| F1N566   | F1N566_BOVIN |              | Uncharacterized protein (Fragment)                        | 1.000 | 5.9  | PVTAPAPSSSQQLCR                   | 3 | 0.999     | 1,340,939  | 223,108   |
| F1N586   | F1N586_BOVIN | LOC100298507 | Uncharacterized protein (Fragment)                        | 0.999 | 5.7  | DLNMSDVAIEIQAYDDTAGR              | 3 | 0.999     | 328,435    | 68,534    |
| F1N5A1   | F1N5A1_BOVIN | LOC537018    | Uncharacterized protein                                   | 0.999 | 0.9  | HMGFYLCPGLSSEGGWQPGWTVSVQGSCK     | 3 | 0.999     | 1,766,373  | 281,463   |
| F1N5C0   | F1N5C0_BOVIN | Bt.57412     | Uncharacterized protein (Fragment)                        | 0.999 | 4.6  | ERDEFVVKIEDIEFK                   | 3 | 0.999     |            |           |
| F1N5C1   | F1N5C1_BOVIN | LACTBL1      | Uncharacterized protein                                   | 0.999 | 5.2  |                                   |   |           | 310,213    | 49,321    |
| F1N5H8   | F1N5H8_BOVIN | DDX31        | Uncharacterized protein                                   | 0.999 | 4.8  | PSGQMYSTADLAKLAVLLGGGQPR          | 3 | 0.999     | 1,808,415  | 206,605   |
| F1N5I4   | F1N5I4_BOVIN | ADAM11       | Uncharacterized protein (Fragment)                        | 0.999 | 6.4  | TPGPASAEAGTD                      | 3 | 0.999     | 5,481,476  | 690,002   |
| F1N5K9   | F1N5K9_BOVIN | RAB44        | Uncharacterized protein (Fragment)                        | 0.999 | 8.7  | GPSGTNIIIGSIAGAVLVAAMLGGTGWGFK    | 3 | 0.809     | 2,743,544  | 762,574   |
| F1N5L4   | F1N5L4_BOVIN | TYRO3        | Uncharacterized protein                                   | 0.999 | 1.9  | LGDLGDJSSVTFYHQGK                 | 3 | 0.999     | 3,887,338  | 545,672   |
| F1N5M2   | F1N5M2_BOVIN | Bt.53584     | Uncharacterized protein                                   | 1.000 | 47.5 | YALQLWDTAGQER                     | 3 | 0.999     | 72,123,185 | 4,666,016 |
|          |              |              |                                                           |       |      | CDSVSEDCIK                        | 2 | 0.999     |            |           |
|          |              |              |                                                           |       |      | CCSVNSPPLYCNSEIDAEINTLQS          | 2 | 0.999     |            |           |
|          |              |              |                                                           |       |      | ELSSFIQK                          | 1 | 0.924     |            |           |
|          |              |              |                                                           |       |      | FMYEYSINYGQAPLTLVGYTK             | 2 | 1.000     |            |           |
|          |              |              |                                                           |       |      | FMYEYSINYGQAPLTLVGYTK             | 3 | 1.000     |            |           |
|          |              |              |                                                           |       |      | FPDATETDLQELVAK                   | 2 | 1.000     |            |           |
|          |              |              |                                                           |       |      | GKFPDATETDLQELVAK                 | 2 | 1.000     |            |           |
|          |              |              |                                                           |       |      | GKFPDATETDLQELVAK                 | 3 | 1.000     |            |           |
|          |              |              |                                                           |       |      | GOELCADYSENTFFTEYK                | 2 | 1.000     |            |           |
|          |              |              |                                                           |       |      | HQPQEFPTVEPTNDEICEAFR             | 3 | 1.000     |            |           |
|          |              |              |                                                           |       |      | HQPQEFPTVEPTNDEICEAFR             | 3 | 1.000     |            |           |
|          |              |              |                                                           |       |      | ICSQYAAAGK                        | 2 | 0.999     |            |           |
|          |              |              |                                                           |       |      | ILESTLKSLEDCCHSESSSTAACLNAKGPQLTR | 3 | 0.999     |            |           |
|          |              |              |                                                           |       |      | IPEVFLTK                          | 2 | 1.000     |            |           |
|          |              |              |                                                           |       |      | SYLSVMVGSCTTSPNPTVCFLK            | 2 | 1.000     |            |           |
|          |              |              |                                                           |       |      | VLDQYIFELSR                       | 2 | 1.000     |            |           |
|          |              |              |                                                           |       |      | VPTAHLEDVLPDAEDITITLSK            | 2 | 1.000     |            |           |
|          |              |              |                                                           |       |      | VPTAHLEDVLPDAEDITITLSK            | 3 | 1.000     |            |           |
| F1N5P7   | F1N5P7_BOVIN | Bt.9784      | Uncharacterized protein                                   | 0.999 | 2.0  | FEGYEGHENLKASALYTHSR              | 3 | 0.999     | 420,348    | 43,421    |
| F1N5Q8   | F1N5Q8_BOVIN | SERGEF       | Uncharacterized protein                                   | 0.999 | 3.6  | NEVGGLIKALFIQEK                   | 3 | 0.999     | 10,390,408 | 695,802   |
| F1N5R3   | F1N5R3_BOVIN | PKD2L1       | Uncharacterized protein                                   | 0.999 | 3.4  | ICHGIRGLWGTTLTENTAEINRELYVK       | 3 | 0.999     | 1,705,217  | 166,126   |
| F1N5R7   | F1N5R7_BOVIN | Bt.36236     | Uncharacterized protein                                   | 0.999 | 0.6  | LDSAASQVAIMQFEALHPQLK             | 3 | 0.999     | 3,377,563  | 479,395   |
| F1N5T2   | F1N5T2_BOVIN |              | Uncharacterized protein (Fragment)                        | 0.999 | 9.3  | AEVAQREAEETLREQLSSANHSLSQLASIQIK  | 3 | 0.999     | 2,283,664  | 313,200   |
|          |              |              |                                                           |       |      | LEQLDSTIQSIQRPADEGAELGLEK         | 3 | 0.999     |            |           |
| F1N5T9   | F1N5T9_BOVIN | SERINC5      | Uncharacterized protein (Fragment)                        | 0.999 | 5.9  |                                   |   |           | 2,120,239  | 578,651   |
| F1N5U2   | F1N5U2_BOVIN | ZNF592       | Uncharacterized protein                                   | 0.999 | 1.6  | FMVALYFILVVICIMMSNTVANEMR         | 3 | 0.999     | 3,976,008  | 532,433   |
| F1N5Z6   | F1N5Z6_BOVIN | LOC100337494 | Uncharacterized protein (Fragment)                        | 0.999 | 9.3  | PRLRNTGWTCQCEQWVPDR               | 3 | 0.999     | 4,002,988  | 492,483   |
| F1N633   | F1N633_BOVIN |              | Uncharacterized protein                                   | 0.999 | 1.4  | SFTFWSSNLNHRHRTGERPYPCPECGR       | 3 | 0.999     | 1,303,780  | 167,408   |
|          |              |              |                                                           |       |      | MIGFCPSTSLGNR                     | 3 | 0.999     |            |           |



|        |              |           |                                                                   |       |                                   |   |       |  |            |            |
|--------|--------------|-----------|-------------------------------------------------------------------|-------|-----------------------------------|---|-------|--|------------|------------|
| F1N7E3 | F1N7E3_BOVIN | MYPOP     | Uncharacterized protein (Fragment)                                | 0.999 | 6.2                               |   |       |  | 227,926    | 49,418     |
| F1N7E7 | F1N7E7_BOVIN | Bt.30463  | Uncharacterized protein (Fragment)                                | 0.999 | SISMESCSPPSSGLLYQPPR              | 3 | 0.999 |  |            |            |
|        |              |           |                                                                   |       | 5.5                               |   |       |  | 8,167,863  | 1,024,658  |
|        |              |           |                                                                   |       | EDAQVKLCKMYCGHSESLESQDLVSHMIK     | 3 | 0.999 |  |            |            |
|        |              |           |                                                                   |       | ENALSDISDMLKLNLTESHSTKSSSTPSSISEK | 3 | 0.999 |  |            |            |
| F1N7E8 | F1N7E8_BOVIN | MARK4     | Uncharacterized protein                                           | 0.999 | 2.7                               |   |       |  | 7,605,233  | 461,785    |
|        |              |           |                                                                   |       | NSIASCPPEIQPHVGNRYLLR             | 3 | 0.999 |  |            |            |
| F1N7F6 | F1N7F6_BOVIN | SCUBE2    | Uncharacterized protein                                           | 0.999 | 2.4                               |   |       |  | 1,750,819  | 299,729    |
|        |              |           |                                                                   |       | TCKDSTSTGVHCSQPVGFTLQMDGK         | 3 | 0.999 |  |            |            |
| F1N7G1 | F1N7G1_BOVIN | RASSF4    | Uncharacterized protein                                           | 0.999 | 5.6                               |   |       |  | 8,002,142  | 2,386,197  |
|        |              |           |                                                                   |       | SELLSLKTYNCYHEGK                  | 3 | 0.999 |  |            |            |
| F1N7G3 | F1N7G3_BOVIN | WNT9B     | Uncharacterized protein (Fragment)                                | 0.999 | 3.0                               |   |       |  | 2,261,428  | 247,274    |
|        |              |           |                                                                   |       | CHGVSGSCAVR                       | 3 | 0.999 |  |            |            |
| F1N7G5 | F1N7G5_BOVIN | CCDC11    | Uncharacterized protein                                           | 0.999 | 5.5                               |   |       |  | 1,629,682  | 435,079    |
|        |              |           |                                                                   |       | EFEAGIAAEKSFQDKIQIGILSTHQVVR      | 3 | 0.999 |  |            |            |
| F1N7G8 | F1N7G8_BOVIN | PDS5B     | Uncharacterized protein                                           | 0.999 | 2.3                               |   |       |  | 5,734,021  | 560,480    |
|        |              |           |                                                                   |       | AIFSKVMVTRNLDPGK                  | 3 | 0.999 |  |            |            |
|        |              |           |                                                                   |       | EDILENEDEQNSPPK                   | 3 | 0.999 |  |            |            |
| F1N7H0 | F1N7H0_BOVIN | DNAJC7    | Uncharacterized protein                                           | 0.999 | 3.8                               |   |       |  | 5,138,075  | 1,564,594  |
|        |              |           |                                                                   |       | VNYNLALAIISFLSERMKK               | 3 | 0.999 |  |            |            |
| F1N7I5 | F1N7I5_BOVIN | NUMA1     | Uncharacterized protein (Fragment)                                | 0.999 | 1.4                               |   |       |  | 6,743,129  | 476,218    |
|        |              |           |                                                                   |       | FFQKEQALSALQLEHTSTQALASELLPVK     | 3 | 0.999 |  |            |            |
| Q07536 | MMSA_BOVIN   | ALDH6A1   | Methylmalonate-semialdehyde dehydrogenase [acylating], mitochondr | 0.999 | 4.3                               |   |       |  | 308,907    | 53,954     |
| F1N7K8 | F1N7K8_BOVIN | ALDH6A1   | Uncharacterized protein                                           | 0.999 | 4.3                               |   |       |  | 308,907    | 53,954     |
|        |              |           |                                                                   |       | MAAVAVAAAAAALRARILOVSSK           | 3 | 0.999 |  |            |            |
| F1N7M6 | F1N7M6_BOVIN | CCDC21    | Uncharacterized protein (Fragment)                                | 0.999 | 2.7                               |   |       |  | 5,311,625  | 438,220    |
|        |              |           |                                                                   |       | ELSVQNDLIEKLNLTQEHRL              | 3 | 0.999 |  |            |            |
| F1N7N4 | F1N7N4_BOVIN | Bt.62495  | Uncharacterized protein (Fragment)                                | 0.999 | 4.8                               |   |       |  | 19,359,818 | 1,397,890  |
|        |              |           |                                                                   |       | DLRVPVNASFCSPDAR                  | 3 | 0.831 |  |            |            |
|        |              |           |                                                                   |       | PLPSHLGSPSDSTGRRPFSHLYKR          | 3 | 0.999 |  |            |            |
|        |              |           |                                                                   |       | VPVNASFCSPDARPVTVGVVPC            | 3 | 0.903 |  |            |            |
| F1N7N7 | F1N7N7_BOVIN | Bt.39403  | Uncharacterized protein (Fragment)                                | 0.999 | 3.5                               |   |       |  | 1,718,642  | 124,170    |
| Q1LZH7 | KANK2_BOVIN  | KANK2     | KN motif and ankyrin repeat domain-containing protein             | 0.999 | 2.8                               |   |       |  | 1,718,642  | 124,170    |
|        |              |           |                                                                   |       | LGDVNAKASQAQGTALMLAVSHGR          | 3 | 0.999 |  |            |            |
| F1N7Q0 | F1N7Q0_BOVIN | Bt.105578 | Uncharacterized protein                                           | 0.960 | 0.6                               |   |       |  | 888,836    | 370,601    |
|        |              |           |                                                                   |       | VPORSKGP                          | 3 | 0.824 |  |            |            |
| F1N7Q1 | F1N7Q1_BOVIN | Bt.21054  | Uncharacterized protein                                           | 1.000 | 6.3                               |   |       |  | 1,955,030  | 328,916    |
|        |              |           |                                                                   |       | EADVPGPAAPLPPGGPSLPPGQK           | 3 | 0.999 |  |            |            |
|        |              |           |                                                                   |       | FHPDQLVLLVFTKEDNQCNQFCRACEK       | 3 | 0.999 |  |            |            |
| F1N7Q7 | F1N7Q7_BOVIN | Bt.28075  | Uncharacterized protein (Fragment)                                | 0.999 | 1.3                               |   |       |  | 5,475,292  | 548,906    |
|        |              |           |                                                                   |       | PGSPGLPMPGRRSISIGYLLVK            | 3 | 0.999 |  |            |            |
| F1N7Q8 | F1N7Q8_BOVIN | ARHGAP32  | Uncharacterized protein                                           | 0.999 | 0.9                               |   |       |  | 1,657,984  | 276,564    |
|        |              |           |                                                                   |       | LLALALAEAAQASTQPLK                | 3 | 0.999 |  |            |            |
| F1N7R3 | F1N7R3_BOVIN | RGS3      | Uncharacterized protein                                           | 1.000 | 2.9                               |   |       |  | 6,279,050  | 553,992    |
|        |              |           |                                                                   |       | DPSPGQEPLPGQELPPKEDSSSGQK         | 3 | 0.999 |  |            |            |
| F1N7R5 | F1N7R5_BOVIN | Bt.105074 | Uncharacterized protein                                           | 0.999 | 2.5                               |   |       |  | 2,534,854  | 193,425    |
|        |              |           |                                                                   |       | VPSPLTDEEGDFILIHEDLR              | 3 | 0.999 |  |            |            |
| F1N7S8 | F1N7S8_BOVIN | LOC783604 | Uncharacterized protein                                           | 0.999 | 3.1                               |   |       |  | 3,040,354  | 291,239    |
|        |              |           |                                                                   |       | SISGGTFVFPVGGHSLYLEAK             | 3 | 0.999 |  |            |            |
| F1N7W5 | F1N7W5_BOVIN | LOC788840 | Uncharacterized protein (Fragment)                                | 0.999 | 2.2                               |   |       |  | 8,568,000  | 1,744,723  |
|        |              |           |                                                                   |       | VQPLISADNK                        | 3 | 0.999 |  |            |            |
| Q0P5D2 | CPSF6_BOVIN  | CPSF6     | Cleavage and polyadenylation specificity factor subunit           | 0.999 | 2.0                               |   |       |  | 5,977,871  | 2,019,935  |
| F2Z4E9 | F2Z4E9_BOVIN | CPSF6     | Uncharacterized protein                                           | 0.999 | 2.0                               |   |       |  | 5,977,871  | 2,019,935  |
|        |              |           |                                                                   |       | NRAISSAISR                        | 3 | 0.999 |  |            |            |
| F2Z4F0 | F2Z4F0_BOVIN | ACTR1A    | Uncharacterized protein                                           | 0.999 | 3.5                               |   |       |  | 10,241,208 | 822,266    |
|        |              |           |                                                                   |       | IDIARDVSRFLR                      | 3 | 0.999 |  |            |            |
| F2Z4F5 | F2Z4F5_BOVIN | DPP3      | Uncharacterized protein                                           | 0.999 | 3.4                               |   |       |  | 5,762,393  | 2,081,354  |
|        |              |           |                                                                   |       | LRHLGLGKEGITYFSGNCTMEDAK          | 3 | 0.999 |  |            |            |
| F6PS28 | F6PS28_BOVIN | SP140L    | Uncharacterized protein (Fragment)                                | 0.999 | 6.2                               |   |       |  | 1,924,639  | 296,914    |
|        |              |           |                                                                   |       | SGPGEGETELPTFGNKCSVCMCFSK         | 3 | 0.999 |  |            |            |
| F6PT99 | F6PT99_BOVIN | CCDC28B   | Uncharacterized protein                                           | 0.999 | 11.0                              |   |       |  | 8,864,271  | 724,218    |
|        |              |           |                                                                   |       | VPVPTSHSGSLALGLPHLPSK             | 3 | 0.999 |  |            |            |
| F6PZ41 | F6PZ41_BOVIN | AP4B1     | Uncharacterized protein                                           | 0.999 | 3.8                               |   |       |  | 3,277,627  | 545,881    |
|        |              |           |                                                                   |       | LLEDQAERPVSVALDFNTLVPVYGKAR       | 3 | 0.999 |  |            |            |
| F6Q0D1 | F6Q0D1_BOVIN | Bt.103298 | Uncharacterized protein                                           | 0.999 | 4.9                               |   |       |  | 1,103,090  | 226,715    |
|        |              |           |                                                                   |       | KFNYYGGGNSNLPGWSDRRHHQYEQHWYK     | 3 | 0.999 |  |            |            |
| F6Q3P6 | F6Q3P6_BOVIN | MINK      | Uncharacterized protein                                           | 0.999 | 1.5                               |   |       |  | 2,881,921  | 211,162    |
|        |              |           |                                                                   |       | SDSVLPASHGHLPQAGSLER              | 3 | 0.999 |  |            |            |
| F6Q4V7 | F6Q4V7_BOVIN | Bt.76310  | Uncharacterized protein                                           | 0.999 | 7.1                               |   |       |  | 309,696    | 53,275     |
|        |              |           |                                                                   |       | NTEISHTISGDYIIMTFDLSRR            | 3 | 0.999 |  |            |            |
| F6Q615 | F6Q615_BOVIN | Bt.31540  | Oxysterol-binding protein                                         | 0.999 | 4.0                               |   |       |  | 1,055,702  | 148,268    |
|        |              |           |                                                                   |       | KSFCSIEGIEWNGVMYAKYSTGENVVFIDTK   | 3 | 0.999 |  |            |            |
| F6Q7P1 | F6Q7P1_BOVIN | ATF7IP    | Uncharacterized protein                                           | 0.999 | 2.5                               |   |       |  | 2,196,920  | 306,105    |
|        |              |           |                                                                   |       | TDVLLKNGHENGDLPTSPLENMDYLNDK      | 3 | 0.999 |  |            |            |
| F6QK33 | F6QK33_BOVIN | Bt.11917  | Uncharacterized protein                                           | 0.999 | 7.1                               |   |       |  | 7,371,654  | 696,018    |
|        |              |           |                                                                   |       | EESPSNLTATCYKAVEKLVQGAESGCHSEK    | 3 | 0.999 |  |            |            |
|        |              |           |                                                                   |       | VGLMHIGVFIILLSGERNFVRLNK          | 3 | 0.999 |  |            |            |
| F6QN23 | F6QN23_BOVIN | SLC6A12   | Transporter (Fragment)                                            | 0.999 | 3.0                               |   |       |  | 8,529,795  | 6,598,922  |
|        |              |           |                                                                   |       | MEFVLSVAGEIHLGNVVR                | 3 | 0.999 |  |            |            |
| F6QN63 | F6QN63_BOVIN | IFT52     | Uncharacterized protein                                           | 0.999 | 2.7                               |   |       |  | 1,384,551  | 219,279    |
|        |              |           |                                                                   |       | EENSJMDDVFR                       | 3 | 0.999 |  |            |            |
| F6QNC4 | F6QNC4_BOVIN | Bt.55189  | Uncharacterized protein                                           | 0.999 | 2.7                               |   |       |  | 3,561,528  | 630,179    |
|        |              |           |                                                                   |       | IAREIGYPMIKASAGGGGK               | 3 | 0.999 |  |            |            |
| F6QPK8 | F6QPK8_BOVIN | Bt.56769  | Uncharacterized protein                                           | 0.999 | 3.0                               |   |       |  | 2,284,146  | 265,683    |
|        |              |           |                                                                   |       | QSSPGLTPFPFGNR                    | 3 | 0.999 |  |            |            |
| F6QQ19 | F6QQ19_BOVIN | Bt.105989 | Uncharacterized protein                                           | 0.930 | 4.5                               |   |       |  | 1,726,311  | 284,883    |
|        |              |           |                                                                   |       | MDFSFSFMQIMGNITQPPQLIDSANIR       | 3 | 0.812 |  |            |            |
| F6QRZ3 | F6QRZ3_BOVIN | NARS2     | Uncharacterized protein                                           | 0.999 | 5.7                               |   |       |  | 1,539,200  | 291,242    |
|        |              |           |                                                                   |       | SVRSQSPILASLOISGNAISFFLEIK        | 3 | 0.999 |  |            |            |
| F6QVR0 | F6QVR0_BOVIN | Bt.9097   | Uncharacterized protein                                           | 0.999 | 5.6                               |   |       |  | 1,964,927  | 220,178    |
|        |              |           |                                                                   |       | AHGDGTHPPDPDCAR                   | 3 | 0.999 |  |            |            |
|        |              |           |                                                                   |       | MAEFLPLPCTPLLTDVCAQDSRVPPAK       | 3 | 0.999 |  |            |            |
| F6R1H3 | F6R1H3_BOVIN | Bt.12638  | Uncharacterized protein                                           | 0.999 | 3.6                               |   |       |  | 1,321,962  | 246,706    |
|        |              |           |                                                                   |       | LLEVSPSPQALAHVHPFSSLCQFSSLQPLVR   | 3 | 0.999 |  |            |            |
| F6R7H1 | F6R7H1_BOVIN | Bt.17653  | Uncharacterized protein                                           | 0.999 | 4.1                               |   |       |  | 3,643,220  | 1,523,827  |
|        |              |           |                                                                   |       | MASVLPASNTSMR                     | 3 | 0.999 |  |            |            |
| F6R7X9 | F6R7X9_BOVIN | CCDC8     | Uncharacterized protein                                           | 0.999 | 3.7                               |   |       |  | 2,411,446  | 229,965    |
|        |              |           |                                                                   |       | ERLIQFLEEGRLEEDVAR                | 3 | 0.999 |  |            |            |
| G3MZ90 | G3MZ90_BOVIN |           | Uncharacterized protein (Fragment)                                | 0.999 | 11.1                              |   |       |  | 4,111,921  | 146,999    |
| F6RA30 | F6RA30_BOVIN | Bt.63135  | Uncharacterized protein                                           | 0.999 | 7.3                               |   |       |  | 4,111,921  | 146,999    |
|        |              |           |                                                                   |       | LQLEALLNSLPRPR                    | 3 | 0.999 |  |            |            |
| F6RAG5 | F6RAG5_BOVIN | Bt.18044  | Uncharacterized protein                                           | 1.000 | 2.0                               |   |       |  | 1,551,382  | 231,696    |
|        |              |           |                                                                   |       | QOMLDDQDELLASTRRDYEK              | 3 | 0.999 |  |            |            |
| F6RF21 | F6RF21_BOVIN | Bt.3161   | Uncharacterized protein                                           | 0.999 | 0.5                               |   |       |  | 17,319,250 | 1,572,372  |
|        |              |           |                                                                   |       | EAIYSGFIR                         | 3 | 0.999 |  |            |            |
| P02081 | HBBF_BOVIN   |           | Hemoglobin fetal subunit beta                                     | 1.000 | 71.7                              |   |       |  | 16,607,007 | 1,437,124  |
| F6RFA2 | F6RFA2_BOVIN | Bt.102944 | Uncharacterized protein (Fragment)                                | 1.000 | 64.2                              |   |       |  | 16,607,007 | 1,437,124  |
|        |              |           |                                                                   |       | FFESFGDLSADAILGNPK                | 2 | 1.000 |  |            |            |
|        |              |           |                                                                   |       | FFESFGDLSADAILGNPK                | 3 | 1.000 |  |            |            |
|        |              |           |                                                                   |       | FGSEFPELQASFK                     | 2 | 0.959 |  |            |            |
|        |              |           |                                                                   |       | GAFASLSLHCDKLVDPENFR              | 3 | 0.860 |  |            |            |
|        |              |           |                                                                   |       | LLGNLVVVLAR                       | 2 | 1.000 |  |            |            |
|        |              |           |                                                                   |       | LLVVPVWVQR                        | 2 | 1.000 |  |            |            |
|        |              |           |                                                                   |       | RFGEFPELQASFK                     | 3 | 1.000 |  |            |            |
|        |              |           |                                                                   |       | VKVDEVGGEALGR                     | 3 | 1.000 |  |            |            |
|        |              |           |                                                                   |       | VTVGANALHR                        | 3 | 0.973 |  |            |            |
| F6RG16 | F6RG16_BOVIN | ENO4      | Uncharacterized protein                                           | 0.999 | 4.9                               |   |       |  | 78,520,771 | 29,062,792 |
|        |              |           |                                                                   |       | EDSEQWDSIYNALGSRCYIAGTASKSISK     | 3 | 0.999 |  |            |            |
| F6RLA2 | F6RLA2_BOVIN | Bt.14445  | Uncharacterized protein                                           | 0.999 | 4.6                               |   |       |  | 2,299,650  | 301,373    |
|        |              |           |                                                                   |       | WFSQLTLGIAYLHSK                   | 3 | 0.999 |  |            |            |
| F6RLQ6 | F6RLQ6_BOVIN | Bt.87418  | Uncharacterized protein                                           | 0.999 | 2.6                               |   |       |  | 4,251,263  | 358,285    |
|        |              |           |                                                                   |       | LTLSEEKQKLESQLAGIPK               | 3 | 0.999 |  |            |            |
| F6RLR4 | F6RLR4_BOVIN | ISM1      | Uncharacterized protein (Fragment)                                | 0.999 | 4.8                               |   |       |  | 2,616,642  | 342,839    |
|        |              |           |                                                                   |       | QNLLNMEASASTSETSFPISK             | 3 | 0.999 |  |            |            |
| F6RM04 | F6RM04_BOVIN | RBM15B    | Uncharacterized protein (Fragment)                                | 0.999 | 1.7                               |   |       |  | 1,372,445  | 172,133    |

|        |              |              |                                          |       |                        |   |       |            |           |
|--------|--------------|--------------|------------------------------------------|-------|------------------------|---|-------|------------|-----------|
|        |              |              |                                          |       | QRSLSPVAAPPLREPR       | 3 | 0.999 |            |           |
| F6RMH4 | F6RMH4_BOVIN | BL48370      | Uncharacterized protein                  | 0.999 | 3.8                    |   |       | 2,635,358  | 376,356   |
| F6RMK7 | F6RMK7_BOVIN | CCR9         | Uncharacterized protein                  | 0.999 | DPAGHCPTOAGLPPQASPTK   | 3 | 0.999 | 7,081,517  | 1,006,459 |
| F6RY07 | F6RY07_BOVIN | BL9415       | Uncharacterized protein                  | 0.999 | 4.6                    |   |       |            |           |
| F6S103 | F6S103_BOVIN | ZNF131       | Uncharacterized protein (Fragment)       | 0.999 | 2.6                    |   |       | 7,182,536  | 360,214   |
| F6S1Q0 | F6S1Q0_BOVIN | KRT18        | Uncharacterized protein                  | 0.913 | WPNVSDIWSYTLTKFIARYGGR | 3 | 0.999 | 6,929,554  | 802,686   |
| P18902 | RET4_BOVIN   | RBP4         | Retinol-binding protein 4                | 1.000 | 4.1                    |   |       |            |           |
| G1K122 | G1K122_BOVIN | RBP4         | Uncharacterized protein                  | 1.000 | PNHCTLCDLWFMQGNELRR    | 3 | 0.999 | 1,872,566  | 229,530   |
|        |              |              |                                          |       | 2.1                    |   |       |            |           |
|        |              |              |                                          |       | AQYDELAQK              | 2 | 0.913 |            |           |
|        |              |              |                                          |       | 23.0                   |   |       | 3,352,808  | 147,984   |
|        |              |              |                                          |       | 20.9                   |   |       | 3,352,808  | 147,984   |
|        |              |              |                                          |       | DPSDFSPFEVQK           | 2 | 1.000 |            |           |
|        |              |              |                                          |       | LIPHINCYCDGK           | 2 | 0.994 |            |           |
|        |              |              |                                          |       | GROEELCLAR             | 2 | 0.987 |            |           |
|        |              |              |                                          |       | YWGVSFLQK              | 2 | 0.999 |            |           |
| G1K1B6 | G1K1B6_BOVIN | BL10352      | Uncharacterized protein                  | 0.999 | 15.3                   |   |       | 409,847    | 77,774    |
| Q1JQ82 | POP5_BOVIN   | POP5         | Ribonuclease P/MRP protein subunit POP5  | 0.999 | 15.3                   |   |       | 409,847    | 77,774    |
| Q3SYW2 | CO2_BOVIN    | C2           | Complement C2                            | 0.999 | 2.3                    |   |       | 802,740    | 132,906   |
| Q0V7N2 | Q0V7N2_BOVIN | C2           | Complement component 2                   | 0.999 | 2.2                    |   |       | 802,740    | 132,906   |
| G1K1E3 | G1K1E3_BOVIN | C2           | Uncharacterized protein                  | 0.999 | 2.3                    |   |       | 802,740    | 132,906   |
| G1K1H1 | G1K1H1_BOVIN | MDH2         | Malate dehydrogenase                     | 0.999 | 10.1                   |   |       | 901,772    | 128,268   |
| G1K257 | G1K257_BOVIN | MDH2         | Malate dehydrogenase (Fragment)          | 0.999 | 8.3                    |   |       | 901,772    | 128,268   |
| Q32LG3 | MDHM_BOVIN   | MDH2         | Malate dehydrogenase, mitochondria       | 0.999 | 8.3                    |   |       | 901,772    | 128,268   |
| G1K1Q6 | G1K1Q6_BOVIN | ATP6V1E1     | Uncharacterized protein (Fragment)       | 0.999 | 9.1                    |   |       | 1,398,648  | 165,754   |
| P11019 | VATE1_BOVIN  | ATP6V1E1     | V-type proton ATPase subunit E 1         | 0.999 | 9.3                    |   |       | 1,398,648  | 165,754   |
| G1K1X9 | G1K1X9_BOVIN | PROZ         | Uncharacterized protein                  | 0.999 | 2.1                    |   |       | 2,859,033  | 551,369   |
| P00744 | PROZ_BOVIN   | PROZ         | Vitamin K-dependent protein 2            | 0.999 | 2.3                    |   |       | 2,859,033  | 551,369   |
| Q2TA21 | CN037_BOVIN  |              | Uncharacterized protein C14orf37 homolog | 0.999 | 3.3                    |   |       | 533,606    | 48,342    |
| G1K1Z9 | G1K1Z9_BOVIN | BT51579      | Uncharacterized protein                  | 0.999 | 3.3                    |   |       | 533,606    | 48,342    |
| G1K238 | G1K238_BOVIN | COL4A1       | Uncharacterized protein                  | 0.999 | 1.2                    |   |       | 4,701,929  | 571,399   |
| G3MVZ9 | G3MVZ9_BOVIN | LOC523964    | Uncharacterized protein (Fragment)       | 0.999 | 3.8                    |   |       | 2,436,400  | 320,086   |
| G3MW08 | G3MW08_BOVIN | LOC100337076 | Uncharacterized protein                  | 0.999 | 1.4                    |   |       | 3,782,104  | 355,238   |
| G3MW09 | G3MW09_BOVIN | BT82323      | Uncharacterized protein                  | 0.999 | 2.9                    |   |       | 7,728,658  | 427,534   |
| G3MWH6 | G3MWH6_BOVIN | CACNA1I      | Uncharacterized protein (Fragment)       | 0.999 | 1.3                    |   |       | 3,753,781  | 417,302   |
| G3N292 | G3N292_BOVIN | CACNA1I      | Uncharacterized protein (Fragment)       | 0.999 | 1.3                    |   |       | 3,753,781  | 417,302   |
| G3MWN6 | G3MWN6_BOVIN | ABCA2        | Uncharacterized protein (Fragment)       | 1.000 | 3.0                    |   |       | 22,080,397 | 1,801,197 |
| G3MWP7 | G3MWP7_BOVIN | LOC615569    | Uncharacterized protein (Fragment)       | 0.999 | 2.6                    |   |       | 4,309,388  | 420,654   |
| G3MWW6 | G3MWW6_BOVIN | LOC100336728 | Uncharacterized protein (Fragment)       | 0.999 | 16.4                   |   |       | 2,246,009  | 140,745   |
| G3MWX0 | G3MWX0_BOVIN | BT96822      | Uncharacterized protein                  | 0.999 | 2.2                    |   |       | 2,982,083  | 388,056   |
| G3MWX2 | G3MWX2_BOVIN | LOC789244    | Uncharacterized protein                  | 0.999 | 5.7                    |   |       | 53,907,861 | 2,463,330 |
| Q3MHR0 | LYPE1_BOVIN  | LYPLA1       | AcyL-protein thioesterase 1              | 0.999 | 5.7                    |   |       | 53,907,861 | 2,463,330 |
| G3MX00 | G3MX00_BOVIN | CDK4         | Uncharacterized protein (Fragment)       | 0.999 | 5.8                    |   |       | 5,211,912  | 1,543,078 |
| G3N0Q2 | G3N0Q2_BOVIN | LOC100298773 | Uncharacterized protein                  | 0.999 | 3.2                    |   |       | 6,239,371  | 545,488   |
| G3MX41 | G3MX41_BOVIN | OR7A10       | Uncharacterized protein                  | 0.999 | 3.1                    |   |       | 6,239,371  | 545,488   |
| G3MX60 | G3MX60_BOVIN |              | Uncharacterized protein (Fragment)       | 0.999 | 2.7                    |   |       | 1,612,816  | 294,830   |
| G3N0I6 | G3N0I6_BOVIN |              | Uncharacterized protein (Fragment)       | 0.999 | 3.3                    |   |       | 1,612,816  | 294,830   |
| G3MX65 | G3MX65_BOVIN | WFDC2        | Uncharacterized protein                  | 0.999 | 13.0                   |   |       | 906,277    | 140,555   |
| Q3T0Z0 | Q3T0Z0_BOVIN | WFDC2        | Uncharacterized protein                  | 0.999 | 17.9                   |   |       | 906,277    | 140,555   |
| G3MX66 | G3MX66_BOVIN | BT88330      | Uncharacterized protein                  | 0.999 | 14.1                   |   |       | 1,962,594  | 543,159   |
| G3MX79 | G3MX79_BOVIN | OR14C36      | Uncharacterized protein                  | 0.999 | 9.7                    |   |       | 1,751,102  | 607,400   |
| Q2KJ45 | Q2KJ45_BOVIN | TARDBP       | TAR DNA binding protein                  | 0.999 | 7.4                    |   |       | 1,254,056  | 393,258   |
| G3MX91 | G3MX91_BOVIN | TARDBP       | Uncharacterized protein                  | 0.999 | 5.3                    |   |       | 1,254,056  | 393,258   |
| G3MX97 | G3MX97_BOVIN |              | Uncharacterized protein (Fragment)       | 0.999 | 1.9                    |   |       | 1,674,059  | 283,485   |
| G3MXA2 | G3MXA2_BOVIN | BT86404      | Uncharacterized protein                  | 0.999 | 7.0                    |   |       | 2,085,767  | 222,338   |
| G3MXA5 | G3MXA5_BOVIN | BT74139      | Uncharacterized protein                  | 0.999 | 4.6                    |   |       | 2,889,362  | 436,768   |
| G3MXB9 | G3MXB9_BOVIN | BT56024      | Uncharacterized protein (Fragment)       | 0.999 | 1.9                    |   |       | 2,019,077  | 505,606   |
| G3MXC3 | G3MXC3_BOVIN | LTBP4        | Uncharacterized protein (Fragment)       | 0.999 | 3.4                    |   |       | 1,943,301  | 308,138   |
| G3MXE8 | G3MXE8_BOVIN |              | Uncharacterized protein (Fragment)       | 0.999 | 2.1                    |   |       | 1,366,960  | 165,415   |
| G3MXH1 | G3MXH1_BOVIN |              | Uncharacterized protein (Fragment)       | 0.999 | 1.5                    |   |       | 978,492    | 137,980   |
| G3MXH2 | G3MXH2_BOVIN | BL103804     | Uncharacterized protein                  | 0.999 | 10.1                   |   |       | 262,003    | 25,863    |
| G3N1U2 | G3N1U2_BOVIN | BL103804     | Uncharacterized protein (Fragment)       | 0.999 | 7.7                    |   |       | 262,003    | 25,863    |
| G3MXJ0 | G3MXJ0_BOVIN | LOC531152    | Uncharacterized protein (Fragment)       | 0.999 | 8.8                    |   |       | 8,380,917  | 2,252,398 |
| G3MXK0 | G3MXK0_BOVIN | BT64802      | Uncharacterized protein (Fragment)       | 0.999 | 42.4                   |   |       | 4,652,600  | 466,211   |
| G3MXL2 | G3MXL2_BOVIN | LOC539314    | Uncharacterized protein (Fragment)       | 0.999 | 4.0                    |   |       | 919,428    | 252,852   |
| G3X822 | G3X822_BOVIN | LOC539314    | Uncharacterized protein (Fragment)       | 0.999 | 3.9                    |   |       | 919,428    | 252,852   |
| G3MXL3 | G3MXL3_BOVIN | LOC100299984 | Uncharacterized protein (Fragment)       | 1.000 | 2.0                    |   |       | 498,904    | 64,532    |
| G3MXM2 | G3MXM2_BOVIN |              | Uncharacterized protein                  | 0.999 | 3.9                    |   |       | 12,194,821 | 657,567   |
| G3MXM3 | G3MXM3_BOVIN | LOC100337295 | Uncharacterized protein (Fragment)       | 0.999 | 8.4                    |   |       | 7,176,956  | 2,084,192 |
| G3MXN4 | G3MXN4_BOVIN | BT67851      | Uncharacterized protein                  | 0.999 | 1.7                    |   |       | 3,222,017  | 473,493   |
| G3MXP9 | G3MXP9_BOVIN | LOC100298824 | Uncharacterized protein                  | 0.999 | 18.1                   |   |       | 3,071,942  | 255,447   |
| G3MXQ5 | G3MXQ5_BOVIN |              | Uncharacterized protein (Fragment)       | 0.999 | 6.6                    |   |       | 1,367,039  | 278,340   |
| G3MXQ8 | G3MXQ8_BOVIN | LOC100336654 | Uncharacterized protein                  | 0.999 | 3.4                    |   |       | 4,720,033  | 465,069   |
| G3MXS3 | G3MXS3_BOVIN | BT87502      | Uncharacterized protein                  | 0.999 | 1.2                    |   |       | 595,471    | 97,352    |
| G3MXU4 | G3MXU4_BOVIN |              | Uncharacterized protein (Fragment)       | 0.999 | 23.8                   |   |       | 668,150    | 81,010    |

|          |              |              |                                                         |       |                                                                                                       |                       |                                           |            |           |
|----------|--------------|--------------|---------------------------------------------------------|-------|-------------------------------------------------------------------------------------------------------|-----------------------|-------------------------------------------|------------|-----------|
| G3MXU5   | G3MXU5_BOVIN |              | Uncharacterized protein                                 | 0.999 | ISPSNPTSKSNSTRK<br>4.5                                                                                | 3                     | 0.999                                     | 27,395,859 | 1,129,310 |
|          |              |              |                                                         |       | NEDNNRSTSVGTNYESR<br>VRTAOQVMLGARQPTETVAVYETHPK                                                       | 3                     | 0.999                                     |            |           |
| G3MXX3   | G3MXX3_BOVIN | Bt.103298    | Uncharacterized protein (Fragment)                      | 0.999 | 2.6                                                                                                   | 3                     | 0.999                                     | 3,227,636  | 407,796   |
|          |              |              |                                                         |       | KFNYYGGNSNLPWGSRRHHOYEQHWYK<br>RQQRSSASESETDDSDDDK                                                    | 3                     | 0.999                                     |            |           |
| G3MXX8   | G3MXX8_BOVIN | SCRT1        | Uncharacterized protein                                 | 0.999 | 17.3                                                                                                  | 3                     | 0.999                                     | 1,252,077  | 157,110   |
|          |              |              |                                                         |       | AGAGTEARAGPGAGSSGGRHACGECGK<br>PELATAAGGYINGDAAVSEGYAADAFFITDGRSR                                     | 3                     | 0.999                                     |            |           |
| G3MXZ5   | G3MXZ5_BOVIN | CELSR2       | Uncharacterized protein                                 | 0.999 | 2.2                                                                                                   | 3                     | 0.999                                     | 627,853    | 228,911   |
|          |              |              |                                                         |       | STITLQLREGRVLSVSEGTGLQASSLQLEPGR                                                                      | 3                     | 0.999                                     |            |           |
| G3MY13   | G3MY13_BOVIN | Bt.64960     | Uncharacterized protein (Fragment)                      | 0.999 | 2.6                                                                                                   | 3                     | 0.999                                     | 6,645,277  | 923,104   |
|          |              |              |                                                         |       | EDAQVKLCKMYCGHSFESLQDLSVHMIIK                                                                         | 3                     | 0.999                                     |            |           |
| G3SWY1   | AR15A_BOVIN  | AR15A        | AT-rich interactive domain-containing protein 5/        | 0.999 | 5.1                                                                                                   | 3                     | 0.999                                     | 509,700    | 120,887   |
| G3MY61   | G3MY61_BOVIN | AR15A        | Uncharacterized protein                                 | 0.999 | 4.7                                                                                                   | 3                     | 0.999                                     | 509,700    | 120,887   |
|          |              |              |                                                         |       | GPAAGPSLFLGASGCPEAYKRLLSFYCR                                                                          | 3                     | 0.999                                     |            |           |
| G3MY68   | G3MY68_BOVIN |              | Uncharacterized protein (Fragment)                      | 0.999 | 5.3                                                                                                   | 3                     | 0.999                                     | 2,232,256  | 888,749   |
|          |              |              |                                                         |       | PQRDLSODPEAGLSR                                                                                       | 3                     | 0.999                                     |            |           |
| G3MY73   | G3MY73_BOVIN |              | Uncharacterized protein                                 | 0.999 | 7.2                                                                                                   | 3                     | 0.999                                     | 2,331,647  | 209,991   |
|          |              |              |                                                         |       | DAVVAVRRLATAVEEATGAFQLGLEK                                                                            | 3                     | 0.999                                     |            |           |
| G3MYA0   | G3MYA0_BOVIN | PIK3R5       | Uncharacterized protein                                 | 0.999 | 2.0                                                                                                   | 3                     | 0.999                                     | 197,961    | 84,045    |
| G3N1G6   | G3N1G6_BOVIN | PIK3R5       | Uncharacterized protein                                 | 0.999 | 2.0                                                                                                   | 3                     | 0.999                                     | 197,961    | 84,045    |
|          |              |              |                                                         |       | NVLGLMHLPEVLQCSLK                                                                                     | 3                     | 0.999                                     |            |           |
| G3MYA2   | G3MYA2_BOVIN | P25500       | Uncharacterized protein                                 | 0.999 | 2.5                                                                                                   | 3                     | 0.999                                     | 2,173,077  | 62,898    |
| P25500-2 | PAP0A_BOVIN  | PAP0A        | Isoform Short of Poly(A) polymerase alpha               | 0.999 | 2.6                                                                                                   | 3                     | 0.999                                     | 2,173,077  | 62,898    |
| Q3TOA2   | Q3TOA2_BOVIN | PAP0A        | PAP0A protein                                           | 0.999 | 2.6                                                                                                   | 3                     | 0.999                                     | 2,173,077  | 62,898    |
| P25500   | PAP0A_BOVIN  | PAP0A        | Poly(A) polymerase alpha                                | 0.999 | 2.4                                                                                                   | 3                     | 0.999                                     | 2,173,077  | 62,898    |
|          |              |              |                                                         |       | PSGNAAKIPNPIVGVKR                                                                                     | 3                     | 0.999                                     |            |           |
| G3MYF0   | G3MYF0_BOVIN | DDX53        | Uncharacterized protein (Fragment)                      | 0.999 | 4.4                                                                                                   | 3                     | 0.999                                     | 1,247,314  | 213,080   |
|          |              |              |                                                         |       | RLAQSYLKQPMIVYVGLTDLVTVNTVK                                                                           | 3                     | 0.999                                     |            |           |
| G3MYH3   | G3MYH3_BOVIN | SYNE1        | Uncharacterized protein (Fragment)                      | 0.999 | 0.6                                                                                                   | 3                     | 0.999                                     | 2,648,504  | 327,956   |
|          |              |              |                                                         |       | QWKDLQAEAPYHLLHLK                                                                                     | 3                     | 0.999                                     |            |           |
| P21758-2 | MSRE_BOVIN   | MSR1         | Isoform II of Macrophage scavenger receptor types I and | 0.999 | 5.2                                                                                                   | 3                     | 0.999                                     | 1,361,632  | 177,742   |
| P21758   | MSRE_BOVIN   | MSR1         | Macrophage scavenger receptor types I and I             | 0.999 | 4.0                                                                                                   | 3                     | 0.999                                     | 1,361,632  | 177,742   |
| G3MY10   | G3MY10_BOVIN | MSR1         | Uncharacterized protein                                 | 0.999 | 5.2                                                                                                   | 3                     | 0.999                                     | 1,361,632  | 177,742   |
|          |              |              |                                                         |       | NCTVGSVNDISPSPEGK                                                                                     | 3                     | 0.999                                     |            |           |
| G3MY17   | G3MY17_BOVIN | MAGEL2       | Uncharacterized protein                                 | 0.999 | 2.3                                                                                                   | 3                     | 0.999                                     | 332,901    | 76,235    |
|          |              |              |                                                         |       | ASKAGPSILMATAAAPQVMAITQEASK                                                                           | 3                     | 0.999                                     |            |           |
| G3MYL8   | G3MYL8_BOVIN | SOX4         | Uncharacterized protein                                 | 0.999 | 9.3                                                                                                   | 3                     | 0.999                                     | 1,416,384  | 361,905   |
|          |              |              |                                                         |       | GDKVGGSGHGGGGGGSHAGGGGGGAPGKHPAEK                                                                     | 3                     | 0.999                                     |            |           |
| G3MYQ9   | G3MYQ9_BOVIN | Bt.100871    | Uncharacterized protein                                 | 0.999 | 3.1                                                                                                   | 3                     | 0.999                                     | 2,710,954  | 235,089   |
|          |              |              |                                                         |       | DFSLTLPQKIVALVGGSGGGK                                                                                 | 3                     | 0.999                                     |            |           |
| G3MYU1   | G3MYU1_BOVIN | Bt.20209     | Uncharacterized protein                                 | 0.999 | 9.0                                                                                                   | 3                     | 0.999                                     | 2,621,109  | 383,552   |
|          |              |              |                                                         |       | PPGSNINGVPPNPTPIVQRLPAFLDNHNYAK<br>PSSPVTSHISVLFGEEDSLLRVDGIRYNR                                      | 3                     | 0.999                                     |            |           |
| G3MYU9   | G3MYU9_BOVIN | Bt.105569    | Uncharacterized protein                                 | 0.999 | 8.6                                                                                                   | 3                     | 0.999                                     | 7,708,746  | 615,074   |
|          |              |              |                                                         |       | SLLNHTSAHRQKTESALNALLQR<br>VSLPLRTNYLYGK                                                              | 3                     | 0.999                                     |            |           |
| G3MYW0   | G3MYW0_BOVIN | Bt.62315     | Uncharacterized protein (Fragment)                      | 0.965 | 6.4                                                                                                   | 3                     | 0.999                                     | 2,327,458  | 215,832   |
|          |              |              |                                                         |       | SVREHQASLDPNSPRDFIDCFLTK                                                                              | 3                     | 0.858                                     |            |           |
| G3MYX4   | G3MYX4_BOVIN | HOXB5        | Uncharacterized protein                                 | 0.999 | 4.0                                                                                                   | 3                     | 0.999                                     | 4,524,335  | 909,084   |
|          |              |              |                                                         |       | AFFAPAQEPK                                                                                            | 3                     | 0.999                                     |            |           |
| G3MYZ2   | G3MYZ2_BOVIN | LOC520267    | Uncharacterized protein (Fragment)                      | 0.914 | 8.2                                                                                                   | 3                     | 0.825                                     | 484,907    | 102,801   |
|          |              |              |                                                         |       | ASCNPOEGQQPKKERESSPPALQTVQLPR                                                                         | 3                     | 0.825                                     |            |           |
| G3MYZ3   | G3MYZ3_BOVIN | Bt.106415    | Uncharacterized protein                                 | 1.000 | 11.8                                                                                                  | 3                     | 0.999                                     | 14,648,989 | 2,233,153 |
|          |              |              |                                                         |       | LANEVLENICAMEGLPQK<br>LANEVLENICAMEGLPQK<br>LAPQLSTEELFLGK<br>LKPELAGEELWLLADFTNVVEK<br>QILQSINAILSQK | 2<br>3<br>2<br>3<br>2 | 0.965<br>0.992<br>0.999<br>1.000<br>1.000 |            |           |
| G3MZ21   | G3MZ21_BOVIN |              | Uncharacterized protein                                 | 1.000 | 25.2                                                                                                  | 3                     | 1.000                                     | 2,613,314  | 167,609   |
|          |              |              |                                                         |       | FFESFGDLSADAILGNPK<br>LLVVYPWTQR                                                                      | 2<br>2                | 1.000<br>1.000                            |            |           |
| G3MZ38   | G3MZ38_BOVIN |              | Uncharacterized protein (Fragment)                      | 0.999 | 5.0                                                                                                   | 3                     | 0.999                                     | 6,898,879  | 5,211,710 |
|          |              |              |                                                         |       | KPVSLDPSVRHLVER                                                                                       | 3                     | 0.999                                     |            |           |
| G3MZ41   | G3MZ41_BOVIN | Bt.88879     | Uncharacterized protein (Fragment)                      | 0.999 | 14.3                                                                                                  | 3                     | 0.999                                     | 2,730,500  | 513,812   |
|          |              |              |                                                         |       | MNEVNCYRCGESGHLTRECPIEANT                                                                             | 3                     | 0.999                                     |            |           |
| G3MZ70   | G3MZ70_BOVIN |              | Uncharacterized protein (Fragment)                      | 0.999 | 3.8                                                                                                   | 3                     | 0.999                                     | 1,917,237  | 691,027   |
|          |              |              |                                                         |       | QPMHTLSIQPSHPKGRSPPPAR                                                                                | 3                     | 0.999                                     |            |           |
| G3MZC3   | G3MZC3_BOVIN | LOC100336118 | Uncharacterized protein                                 | 0.946 | 7.3                                                                                                   | 3                     | 0.999                                     | 4,509,271  | 744,454   |
|          |              |              |                                                         |       | DQVERAALGGTARAPAMAEASASTR                                                                             | 3                     | 0.809                                     |            |           |
| G3MZE2   | G3MZE2_BOVIN | PAK2         | Uncharacterized protein                                 | 0.999 | 5.7                                                                                                   | 3                     | 0.999                                     | 14,420,487 | 759,234   |
|          |              |              |                                                         |       | YTRYEKIGQASGTVFTATDVALGQVEAIK                                                                         | 3                     | 0.999                                     |            |           |
| G3MZE3   | G3MZE3_BOVIN | LOC100336691 | Uncharacterized protein                                 | 0.999 | 0.9                                                                                                   | 3                     | 0.999                                     | 3,784,908  | 412,019   |
|          |              |              |                                                         |       | RAPAAAAPVDQLQSAPGGR                                                                                   | 3                     | 0.999                                     |            |           |
| G3MZJ5   | G3MZJ5_BOVIN | Bt.40996     | Uncharacterized protein (Fragment)                      | 0.999 | 2.1                                                                                                   | 3                     | 0.999                                     | 2,201,853  | 376,592   |
|          |              |              |                                                         |       | EGTQDRRMLTVPTPAAGVSHLSPEPAPGEELR                                                                      | 3                     | 0.999                                     |            |           |
| G3MZJ9   | G3MZJ9_BOVIN | Bt.103922    | Uncharacterized protein                                 | 0.999 | 12.9                                                                                                  | 3                     | 0.999                                     | 551,971    | 60,205    |
| G3X7X6   | G3X7X6_BOVIN | bTrappin-5   | Uncharacterized protein                                 | 0.999 | 12.0                                                                                                  | 3                     | 0.999                                     | 551,971    | 60,205    |
| G3X847   | G3X847_BOVIN | bTrappin-5   | Uncharacterized protein (Fragment)                      | 0.999 | 11.5                                                                                                  | 3                     | 0.999                                     | 551,971    | 60,205    |
|          |              |              |                                                         |       | GQDPVKGGQVVAQDR                                                                                       | 3                     | 0.999                                     |            |           |
| G3MZK3   | G3MZK3_BOVIN | JAKMIP1      | Uncharacterized protein                                 | 0.999 | 3.4                                                                                                   | 3                     | 0.999                                     | 1,463,813  | 265,618   |
|          |              |              |                                                         |       | QALDQAYLKIQELETLYDALQEQEPGRR                                                                          | 3                     | 0.999                                     |            |           |
| G3MZM6   | G3MZM6_BOVIN | RRP1B        | Uncharacterized protein                                 | 0.999 | 7.3                                                                                                   | 3                     | 0.999                                     | 3,886,490  | 532,311   |
|          |              |              |                                                         |       | ELGALLVNGSGPPVLAWPLPQREGPPANPADRR<br>LVPALCRTPGCGSGGAGHPLK                                            | 3<br>3                | 0.999<br>0.999                            |            |           |
| G3MZX0   | G3MZX0_BOVIN | PPP1R12B     | Uncharacterized protein (Fragment)                      | 0.999 | 1.4                                                                                                   | 3                     | 0.999                                     | 5,230,501  | 1,217,494 |
|          |              |              |                                                         |       | LGPHQAEPTLRL                                                                                          | 3                     | 0.999                                     |            |           |
| G3MZX2   | G3MZX2_BOVIN | Bt.74760     | Uncharacterized protein                                 | 0.999 | 3.0                                                                                                   | 3                     | 0.999                                     | 2,202,527  | 325,914   |
|          |              |              |                                                         |       | MLPPNKAQVLLR                                                                                          | 3                     | 0.999                                     |            |           |
| G3N022   | G3N022_BOVIN | Bt.39893     | Uncharacterized protein                                 | 0.999 | 0.9                                                                                                   | 3                     | 0.999                                     | 2,451,192  | 1,009,784 |
|          |              |              |                                                         |       | FLPWATPGQGAAPVQTLKNRAGPEAK                                                                            | 3                     | 0.999                                     |            |           |
| G3N055   | G3N055_BOVIN | ABCA2        | Uncharacterized protein (Fragment)                      | 0.999 | 1.1                                                                                                   | 3                     | 0.999                                     | 116,114    | 11,180    |
|          |              |              |                                                         |       | CTCSGGTGFCSPGGVGHPPQMR                                                                                | 3                     | 0.999                                     |            |           |
| G3N065   | G3N065_BOVIN | ZNF385C      | Uncharacterized protein                                 | 0.999 | 2.4                                                                                                   | 3                     | 0.999                                     | 2,811,813  | 325,594   |
|          |              |              |                                                         |       | WMVEGQRGAPRR                                                                                          | 3                     | 0.999                                     |            |           |
| G3N078   | G3N078_BOVIN | ZNF215       | Uncharacterized protein                                 | 1.000 | 7.0                                                                                                   | 3                     | 0.999                                     | 7,815,025  | 412,747   |
|          |              |              |                                                         |       | HQKIHAATKAWEGNQCGK<br>NLNSLHKEHLLSKPVETSK                                                             | 3<br>3                | 0.999<br>0.999                            |            |           |
| G3N0C1   | G3N0C1_BOVIN | ANK2         | Uncharacterized protein (Fragment)                      | 1.000 | 2.2                                                                                                   | 3                     | 0.999                                     | 7,195,096  | 581,994   |
|          |              |              |                                                         |       | DLEFCLVTNNGTVSIEHITRIDMTSEKSK<br>FCCFSFSLFLSLGLSITCLSK                                                | 3<br>3                | 0.844<br>0.999                            |            |           |
| G3N0D7   | G3N0D7_BOVIN | CBLB         | Uncharacterized protein (Fragment)                      | 1.000 | 4.6                                                                                                   | 3                     | 0.999                                     | 5,175,529  | 280,329   |
|          |              |              |                                                         |       | ASQDYDPLPSSSDGSQAPARPPK<br>RALEIAQNNVEVAR                                                             | 3<br>3                | 0.999<br>0.832                            |            |           |
| G3N0D8   | G3N0D8_BOVIN | Bt.24617     | Uncharacterized protein                                 | 0.999 | 15.4                                                                                                  | 3                     | 0.999                                     | 853,692    | 170,203   |
|          |              |              |                                                         |       | RELGASLYLAWAASGLLLGGLLCCCTCPSSGGR                                                                     | 3                     | 0.999                                     |            |           |
| G3N0D9   | G3N0D9_BOVIN | BRD1         | Uncharacterized protein                                 | 1.000 | 1.2                                                                                                   | 3                     | 0.999                                     | 2,834,588  | 317,375   |
|          |              |              |                                                         |       | GQEAEEGDKSPPK                                                                                         | 3                     | 0.999                                     |            |           |
| G3N0I0   | G3N0I0_BOVIN | Bt.105146    | Uncharacterized protein                                 | 0.999 | 4.9                                                                                                   | 3                     | 0.999                                     | 12,411,254 | 1,607,145 |
|          |              |              |                                                         |       | LKQGDCDLSGYADAFQFLAQLSWDDCR                                                                           | 3                     | 0.999                                     |            |           |
| G3N0K2   | G3N0K2_BOVIN | LOC540047    | Uncharacterized protein (Fragment)                      | 0.999 | 8.6                                                                                                   | 3                     | 0.999                                     | 1,751,154  | 277,379   |
|          |              |              |                                                         |       | IDFHNPDRAYDAVQLFALTGPAESK                                                                             | 3                     | 0.999                                     |            |           |
| G3N0M2   | G3N0M2_BOVIN | Bt.14361     | Uncharacterized protein                                 | 0.999 | 3.3                                                                                                   | 3                     | 0.999                                     | 234,552    | 21,763    |
| G5E5M3   | G5E5M3_BOVIN | Bt.14361     | Uncharacterized protein                                 | 0.999 | 2.9                                                                                                   | 3                     | 0.999                                     | 234,552    | 21,763    |
|          |              |              |                                                         |       | QPSHLQTHLTHOGTRPHK                                                                                    | 3                     | 0.999                                     |            |           |
| G3N0N7   | G3N0N7_BOVIN |              | Uncharacterized protein                                 | 0.999 | 13.1                                                                                                  | 3                     | 0.999                                     | 604,738    | 101,569   |
| G3X6Z2   | G3X6Z2_BOVIN |              | Uncharacterized protein (Fragment)                      | 0.999 | 16.2                                                                                                  | 3                     | 0.999                                     | 604,738    | 101,569   |
|          |              |              |                                                         |       | IIACSGGCEALVDGTALIKGPR                                                                                | 3                     | 0.999                                     |            |           |
| G3N0R2   | G3N0R2_BOVIN | LOC100336906 | Uncharacterized protein                                 | 0.999 | 8.5                                                                                                   | 3                     | 0.999                                     | 22,473,292 | 1,499,397 |
|          |              |              |                                                         |       | TDIQAIVPSGGYGR                                                                                        | 3                     | 0.999                                     |            |           |
| G3N0V0   | G3N0V0_BOVIN | Bt.97040     | Uncharacterized protein (Fragment)                      | 0.999 | 5.5                                                                                                   | 3                     | 0.999                                     | 1,589,461  | 284,065   |
|          |              |              |                                                         |       | AVGVSIDCSKCHNOPCVR                                                                                    | 3                     | 0.999                                     |            |           |
| G3N0V2   | G3N0V2_BOVIN | Bt.96692     | Uncharacterized protein                                 | 1.000 | 6.9                                                                                                   | 3                     | 0.999                                     | 48,833,374 | 1,885,014 |

|        |              |              |                                                 |       |                                  |   |       |             |            |
|--------|--------------|--------------|-------------------------------------------------|-------|----------------------------------|---|-------|-------------|------------|
|        |              |              |                                                 |       | AOYEIIAGR                        | 2 | 0.973 |             |            |
|        |              |              |                                                 |       | DYQELMNTK                        | 2 | 0.990 |             |            |
|        |              |              |                                                 |       | FLEGQNOVLQTK                     | 2 | 0.922 |             |            |
|        |              |              |                                                 |       | SLNNQFASFIDK                     | 2 | 0.999 |             |            |
| G3N0X4 | G3N0X4_BOVIN |              | Uncharacterized protein (Fragment)              | 0.999 | 12.9                             |   |       | 3,059,724   | 416,395    |
|        |              |              |                                                 |       | GHOAVVVAPEVNLHIK                 | 3 | 0.999 |             |            |
|        |              |              |                                                 |       | VHFLTMFWEAMATLKNVLLFER           | 3 | 0.999 |             |            |
| G3N0X7 | G3N0X7_BOVIN | LONRF2       | Uncharacterized protein                         | 0.999 | 6.0                              |   |       | 2,793,937   | 335,816    |
|        |              |              |                                                 |       | EAQKVLCEVFFPASNLTSSTQSIILLNMRK   | 3 | 0.999 |             |            |
| Q28161 | PKP1_BOVIN   | PKP1         | Plakophilin-1                                   | 0.999 | 2.8                              |   |       | 896,464     | 134,091    |
| G3N156 | G3N156_BOVIN | PKP1         | Uncharacterized protein                         | 0.999 | 2.8                              |   |       | 896,464     | 134,091    |
|        |              |              |                                                 |       | SPNQNVQQAAGALRNLFVR              | 3 | 0.999 |             |            |
| G3N168 | G3N168_BOVIN | LOC527744    | Uncharacterized protein (Fragment)              | 0.999 | 4.4                              |   |       | 4,521,733   | 442,285    |
|        |              |              |                                                 |       | IGEKNCVFRDDFIK                   | 3 | 0.999 |             |            |
| G3N1C8 | G3N1C8_BOVIN | DNAH1        | Uncharacterized protein                         | 1.000 |                                  |   |       | 9,992,196   | 2,847,145  |
|        |              |              |                                                 |       | FGPLGFNIPIYFTDGLRICISQLK         | 3 | 0.999 |             |            |
|        |              |              |                                                 |       | TPPLLSVTTPMPSDLGQPRK             | 3 | 0.999 |             |            |
|        |              |              |                                                 |       | VFQGLMLADPAKVEDK                 | 3 | 0.999 |             |            |
| G3N1E4 | G3N1E4_BOVIN | KIF26A       | Uncharacterized protein (Fragment)              | 0.999 | 1.3                              |   |       | 1,078,978   | 254,423    |
| G5E5S4 | G5E5S4_BOVIN | KIF26A       | Uncharacterized protein (Fragment)              | 0.999 | 1.3                              |   |       | 1,078,978   | 254,423    |
|        |              |              |                                                 |       | EEGTTRPELPTLPDKITSGGGGR          | 3 | 0.999 |             |            |
| Q2KH5  | FAP24_BOVIN  | FAAP24       | Fanconi anemia-associated protein of 24 kD:     | 0.999 | 8.4                              |   |       | 1,565,421   | 237,929    |
| G3N115 | G3N115_BOVIN | FAAP24       | Uncharacterized protein                         | 0.999 | 8.1                              |   |       | 1,565,421   | 237,929    |
|        |              |              |                                                 |       | SCILYITEAEVLVAGNGYR              | 3 | 0.999 |             |            |
| G3N1M2 | G3N1M2_BOVIN |              | Uncharacterized protein (Fragment)              | 0.999 | 9.4                              |   |       | 4,307,908   | 465,432    |
|        |              |              |                                                 |       | HFHNQQERNALQEFVKSQSVNYFAIGIK     | 3 | 0.999 |             |            |
| G3N1N7 | G3N1N7_BOVIN | MK167        | Uncharacterized protein                         | 0.999 | 1.6                              |   |       | 7,878,290   | 686,129    |
|        |              |              |                                                 |       | PQQTGEGTHSPREPEDGRGTAVSQEAPEEK   | 3 | 0.999 |             |            |
|        |              |              |                                                 |       | PVAHGEDVTATHAVSGR                | 3 | 0.999 |             |            |
| G3N1S7 | G3N1S7_BOVIN | Bt.31944     | Uncharacterized protein (Fragment)              | 0.999 | 2.5                              |   |       | 3,489,246   | 392,890    |
|        |              |              |                                                 |       | AHQVGTALAGSAGGFLRLSSGKER         | 3 | 0.999 |             |            |
| G3N1T6 | G3N1T6_BOVIN | TMEM206      | Uncharacterized protein                         | 0.999 | 7.2                              |   |       | 2,423,317   | 390,426    |
|        |              |              |                                                 |       | VQDITANPWNTIALLCGFLALFAAEFAK     | 3 | 0.999 |             |            |
| G3N1X0 | G3N1X0_BOVIN | ZNF483       | Uncharacterized protein (Fragment)              | 0.999 | 2.2                              |   |       | 4,293,270   | 437,873    |
|        |              |              |                                                 |       | CGECGKAFRONSCLTR                 | 3 | 0.999 |             |            |
| G3N1Y3 | G3N1Y3_BOVIN |              | Uncharacterized protein (Fragment)              | 1.000 | 45.3                             |   |       | 8,519,812   | 399,523    |
|        |              |              |                                                 |       | FFESFGDLLSSADAILGNPK             | 2 | 1.000 |             |            |
|        |              |              |                                                 |       | FFESFGDLLSSADAILGNPK             | 3 | 1.000 |             |            |
|        |              |              |                                                 |       | LLGNLVVVLAR                      | 2 | 1.000 |             |            |
|        |              |              |                                                 |       | LLVVPWVQR                        | 2 | 1.000 |             |            |
|        |              |              |                                                 |       | VVTGVANALAHK                     | 3 | 0.973 |             |            |
| G3N1Z3 | G3N1Z3_BOVIN | Bt.103550    | Uncharacterized protein                         | 0.999 | 5.1                              |   |       | 11,020,492  | 296,795    |
|        |              |              |                                                 |       | FVSCLSVSDSSCHSQSKSR              | 3 | 0.999 |             |            |
| G3N2Z7 | G3N2Z7_BOVIN | MAP3K7IP3    | Uncharacterized protein                         | 0.999 | 6.3                              |   |       | 510,397     | 97,432     |
|        |              |              |                                                 |       | GNFDPKAMNNFYDNIPEGVVPKPSPR       | 3 | 0.999 |             |            |
| G3N243 | G3N243_BOVIN | LOC100299988 | Uncharacterized protein                         | 0.999 | 4.1                              |   |       | 1,104,875   | 157,601    |
|        |              |              |                                                 |       | TKTDPLATTFGFNSFGSLEEK            | 3 | 0.999 |             |            |
| G3N267 | G3N267_BOVIN | LOC784731    | Uncharacterized protein                         | 0.999 | 7.2                              |   |       | 2,946,430   | 1,258,862  |
|        |              |              |                                                 |       | DANGNSFATRLSNIFVFGK              | 3 | 0.999 |             |            |
| G3N2C0 | G3N2C0_BOVIN |              | Uncharacterized protein                         | 0.999 | 6.8                              |   |       | 6,541,971   | 1,271,126  |
|        |              |              |                                                 |       | APEVEEQRESSDYCVLCEQVKDK          | 3 | 0.999 |             |            |
| G3N2D0 | G3N2D0_BOVIN | ZNF469       | Uncharacterized protein                         | 0.999 | 0.4                              |   |       | 25,382,771  | 1,000,312  |
|        |              |              |                                                 |       | KAVASPVGELPR                     | 3 | 0.999 |             |            |
| G3N2D2 | G3N2D2_BOVIN | Bt.94964     | Uncharacterized protein                         | 0.999 | 4.6                              |   |       | 1,143,002   | 560,876    |
| Q3SZW1 | TSSK1_BOVIN  | TSSK1B       | Testis-specific serine/threonine-protein kinase | 0.999 | 4.6                              |   |       | 1,143,002   | 560,876    |
|        |              |              |                                                 |       | GYIMGINLGEESYAKVK                | 3 | 0.999 |             |            |
| G3N2E4 | G3N2E4_BOVIN | TCTN1        | Uncharacterized protein                         | 0.999 | 7.1                              |   |       | 17,486,329  | 2,464,389  |
|        |              |              |                                                 |       | ALTCRLVAQKMK                     | 3 | 0.999 |             |            |
|        |              |              |                                                 |       | STTEQDCLAEGIRAPVLFVYNYMOSGCKLR   | 3 | 0.999 |             |            |
| G3N2H8 | G3N2H8_BOVIN | Bt.87090     | Uncharacterized protein                         | 0.999 | 12.6                             |   |       | 7,075,006   | 1,831,738  |
|        |              |              |                                                 |       | MRSVYAHFPINNVIQENGSLAEIR         | 3 | 0.999 |             |            |
| G3N2I1 | G3N2I1_BOVIN | OTUD1        | Uncharacterized protein                         | 0.999 | 5.2                              |   |       | 292,082     | 48,430     |
|        |              |              |                                                 |       | GPAPPPGSPGPGPWAEERPAER           | 3 | 0.999 |             |            |
| G3N2J8 | G3N2J8_BOVIN |              | Uncharacterized protein (Fragment)              | 0.999 | 2.1                              |   |       | 4,357,300   | 425,346    |
|        |              |              |                                                 |       | YLSRERNK                         | 3 | 0.999 |             |            |
| G3N2K8 | G3N2K8_BOVIN | Bt.71103     | Uncharacterized protein                         | 0.999 | 7.7                              |   |       | 2,633,285   | 176,619    |
|        |              |              |                                                 |       | GLQGSASFLOQWQR                   | 3 | 0.999 |             |            |
| G3N2L1 | G3N2L1_BOVIN |              | Uncharacterized protein (Fragment)              | 0.999 | 7.4                              |   |       | 1,551,757   | 230,264    |
|        |              |              |                                                 |       | NLLSVGNSLTVOEIQDDEKNDKMSITHNK    | 3 | 0.999 |             |            |
| G3N2N4 | G3N2N4_BOVIN | NOVA1        | Uncharacterized protein                         | 0.930 | 7.8                              |   |       | 895,931     | 143,683    |
| G3X7R5 | G3X7R5_BOVIN | NOVA1        | Uncharacterized protein                         | 0.930 | 5.9                              |   |       | 895,931     | 143,683    |
|        |              |              |                                                 |       | SSPSDPMTSTRANQVKIIPNSTAGLIIGK    | 3 | 0.874 |             |            |
| G3N2N6 | G3N2N6_BOVIN |              | Uncharacterized protein                         | 0.999 | 2.4                              |   |       | 1,773,308   | 206,420    |
|        |              |              |                                                 |       | CNECGKTFSHNPAFIHQHK              | 3 | 0.999 |             |            |
| G3N2Q6 | G3N2Q6_BOVIN |              | Uncharacterized protein                         | 0.999 | 11.2                             |   |       | 3,866,508   | 220,340    |
| Q5E977 | F118B_BOVIN  | FAM118B      | Protein FAM118B                                 | 0.999 | 3.7                              |   |       | 3,866,508   | 220,340    |
|        |              |              |                                                 |       | MASTGSQASDIDK                    | 3 | 0.999 |             |            |
| G3N2T3 | G3N2T3_BOVIN | Bt.96719     | Uncharacterized protein                         | 0.999 | 1.8                              |   |       | 1,564,772   | 211,476    |
|        |              |              |                                                 |       | HVEVDKAVAGTMDSVFK                | 3 | 0.999 |             |            |
| G3N2T4 | G3N2T4_BOVIN | EME2         | Uncharacterized protein (Fragment)              | 0.999 | 7.8                              |   |       | 2,360,754   | 332,118    |
|        |              |              |                                                 |       | RGCAAGSLLAGAFPVAVVCHQGP          | 3 | 0.999 |             |            |
| G3N2T7 | G3N2T7_BOVIN | LOC100336572 | Uncharacterized protein (Fragment)              | 0.999 | 6.6                              |   |       | 1,641,561   | 306,618    |
|        |              |              |                                                 |       | PNIVLLMADDLGVGDLCCYGNNSVSTPNDR   | 3 | 0.999 |             |            |
| G3N2Z9 | G3N2Z9_BOVIN |              | Uncharacterized protein (Fragment)              | 0.999 | 13.4                             |   |       | 2,592,345   | 665,726    |
|        |              |              |                                                 |       | LSGLLLVFAIGYFLQRICPSPR           | 3 | 0.999 |             |            |
| G3N324 | G3N324_BOVIN | C19H17orf47  | Uncharacterized protein (Fragment)              | 0.999 | 4.7                              |   |       | 709,687     | 86,925     |
|        |              |              |                                                 |       | ASPSLSPKESPSPLREVLQAPK           | 3 | 0.999 |             |            |
| G3N330 | G3N330_BOVIN |              | Uncharacterized protein (Fragment)              | 0.999 | 8.3                              |   |       | 2,687,188   | 303,606    |
| Q5E9D4 | Q5E9D4_BOVIN | BCAS2        | Breast carcinoma amplified sequence 2           | 0.999 | 8.0                              |   |       | 2,687,188   | 303,606    |
|        |              |              |                                                 |       | NEFERLAAROPIELLSMK               | 3 | 0.999 |             |            |
| G3N356 | G3N356_BOVIN | ZSCAN30      | Uncharacterized protein                         | 0.999 | 5.8                              |   |       | 1,276,852   | 160,445    |
|        |              |              |                                                 |       | HCGEDRNSVWAGEFIGIKMK             | 3 | 0.999 |             |            |
|        |              |              |                                                 |       | SFNONSALTQHOR                    | 3 | 0.999 |             |            |
| G3N369 | G3N369_BOVIN | ZNF133       | Uncharacterized protein (Fragment)              | 0.999 | 1.8                              |   |       | 3,937,680   | 774,028    |
|        |              |              |                                                 |       | TNLLSHQRHSREK                    | 3 | 0.999 |             |            |
| G3N385 | G3N385_BOVIN |              | Uncharacterized protein (Fragment)              | 0.999 | 11.2                             |   |       | 2,246,380   | 404,042    |
|        |              |              |                                                 |       | GSASPAAGGRRPQPAAPPSPASASATRGTR   | 3 | 0.999 |             |            |
| G3N3N8 | G3N3N8_BOVIN |              | Uncharacterized protein (Fragment)              | 0.999 | 3.9                              |   |       | 1,812,434   | 118,965    |
|        |              |              |                                                 |       | GILNQHSVKGEYVQRLWQK              | 3 | 0.999 |             |            |
| G3N3S0 | G3N3S0_BOVIN | ZNF677       | Uncharacterized protein (Fragment)              | 0.999 | 2.3                              |   |       | 2,461,871   | 197,789    |
|        |              |              |                                                 |       | CHECDKAYTKFVQLTR                 | 3 | 0.999 |             |            |
| G3N3V4 | G3N3V4_BOVIN | Bt.88202     | Uncharacterized protein (Fragment)              | 0.999 | 6.9                              |   |       | 1,555,721   | 459,722    |
|        |              |              |                                                 |       | LGEAFVVFAGGLDMQADLFAEEDLQAPFLQGR | 3 | 0.999 |             |            |
| G3N3V8 | G3N3V8_BOVIN | C22H3orf67   | Uncharacterized protein (Fragment)              | 0.999 | 3.4                              |   |       | 472,283     | 98,196     |
|        |              |              |                                                 |       | EYLKNAYAEGRTSENQNSLAK            | 3 | 0.999 |             |            |
| G3N3X6 | G3N3X6_BOVIN |              | Uncharacterized protein (Fragment)              | 0.999 | 24.6                             |   |       | 15,246,704  | 1,474,352  |
|        |              |              |                                                 |       | YPRDRGPAFLAIRSVMNEMEDGSFTVSLNK   | 3 | 0.999 |             |            |
| G3N3X8 | G3N3X8_BOVIN | LOC100302389 | Uncharacterized protein                         | 0.999 | 18.6                             |   |       | 8,533,908   | 700,851    |
|        |              |              |                                                 |       | MDRMLSKYSWK                      | 3 | 0.999 |             |            |
| G3X684 | G3X684_BOVIN | TOPBP1       | Uncharacterized protein                         | 0.999 | 3.1                              |   |       | 144,947,240 | 19,098,647 |
|        |              |              |                                                 |       | AFRTVMSQHSQASVSPSPGQSLQK         | 3 | 0.999 |             |            |
|        |              |              |                                                 |       | DAHSEKEDAPKPLENVVGVSK            | 3 | 0.999 |             |            |
| G3X686 | G3X686_BOVIN | SELO         | Uncharacterized protein                         | 0.999 | 3.1                              |   |       | 2,346,496   | 189,695    |
|        |              |              |                                                 |       | NYIAQGAIAEESGDFSEVRR             | 3 | 0.999 |             |            |
| G3X6D0 | G3X6D0_BOVIN | FRMPD3       | Uncharacterized protein (Fragment)              | 0.999 | 0.7                              |   |       | 1,859,067   | 188,891    |
|        |              |              |                                                 |       | KCDMADDASDGK                     | 3 | 0.999 |             |            |
| Q0V007 | GPM6A_BOVIN  | GPM6A        | Neuronal membrane glycoprotein M6- $\alpha$     | 0.999 | 5.4                              |   |       | 2,498,783   | 258,467    |
| G3X6E8 | G3X6E8_BOVIN | GPM6A        | Uncharacterized protein                         | 0.999 | 5.5                              |   |       | 2,498,783   | 258,467    |
|        |              |              |                                                 |       | NITLVEGANLCLDLR                  | 3 | 0.999 |             |            |
| G3X6G5 | G3X6G5_BOVIN | Bt.25870     | Uncharacterized protein                         | 0.999 | 3.4                              |   |       | 5,889,396   | 370,647    |
|        |              |              |                                                 |       | LAKLSALPVISKR                    | 3 | 0.999 |             |            |
| G3X6H0 | G3X6H0_BOVIN | KIAA0284     | Uncharacterized protein (Fragment)              | 0.999 | 1.9                              |   |       | 2,069,336   | 356,946    |
|        |              |              |                                                 |       | YVSTSGRMVLOLQTTGPKPELGPAPAPTK    | 3 | 0.999 |             |            |
| G3X6I0 | G3X6I0_BOVIN | Bt.26891     | Uncharacterized protein (Fragment)              | 0.999 | 0.8                              |   |       | 6,283,392   | 1,193,612  |
|        |              |              |                                                 |       | LVTVTTLNTNISIKK                  | 3 | 0.999 |             |            |



|        |              |           |                                           |       |      |                                 |   |           |             |
|--------|--------------|-----------|-------------------------------------------|-------|------|---------------------------------|---|-----------|-------------|
| G3X6J9 | G3X6J9_BOVIN |           | Uncharacterized protein (Fragment)        | 0.999 | 1.0  |                                 |   | 1,302,877 | 203,072     |
| G3X6K9 | G3X6K9_BOVIN | Bt.31021  | Uncharacterized protein                   | 1.000 | 2.0  | LLSCDANIEAKNK                   | 3 | 0.999     |             |
| G3X6L5 | G3X6L5_BOVIN | ARL8A     | Uncharacterized protein (Fragment)        | 0.999 | 16.2 | QEEGNGDSGGSFQNGHAQLMTDFEKDVLACR | 3 | 0.999     | 1,818,241   |
| G3X6L9 | G3X6L9_BOVIN | LOC538357 | Uncharacterized protein                   | 0.999 | 0.9  | TTFVNVIASGGFQNFEDMIFTVGFNMRKITK | 3 | 0.999     | 2,559,229   |
| G3X6N3 | G3X6N3_BOVIN | Bt.5336   | Uncharacterized protein                   | 1.000 | 51.7 | VAAQGDVVRELKAK                  | 3 | 0.999     | 3,595,525   |
|        |              |           |                                           |       |      | CACSNHEPYFYGSGAFK               | 2 | 1.000     | 145,701,871 |
|        |              |           |                                           |       |      | CGLVPVLAENYK                    | 1 | 0.991     | 9,598,544   |
|        |              |           |                                           |       |      | CGLVPVLAENYK                    | 2 | 1.000     |             |
|        |              |           |                                           |       |      | CLASIAK                         | 1 | 0.802     |             |
|        |              |           |                                           |       |      | CLASIAK                         | 2 | 1.000     |             |
|        |              |           |                                           |       |      | CLMEGAGDVAFVK                   | 2 | 0.982     |             |
|        |              |           |                                           |       |      | DGTRKPVDAENCLAR                 | 2 | 0.997     |             |
|        |              |           |                                           |       |      | DGTRKPVDAENCLAR                 | 3 | 1.000     |             |
|        |              |           |                                           |       |      | DKPDNFOLFGSPHGK                 | 2 | 1.000     |             |
|        |              |           |                                           |       |      | DQTVIQNTDGNNEAWAK               | 2 | 1.000     |             |
|        |              |           |                                           |       |      | DSADGFLK                        | 1 | 0.990     |             |
|        |              |           |                                           |       |      | DTDFKLNELR                      | 2 | 0.999     |             |
|        |              |           |                                           |       |      | EDVIWELLNHAQEHFGK               | 2 | 1.000     |             |
|        |              |           |                                           |       |      | EDVIWELLNHAQEHFGK               | 3 | 1.000     |             |
|        |              |           |                                           |       |      | ESKPPDSSKDECMVK                 | 2 | 1.000     |             |
|        |              |           |                                           |       |      | FDEFKSAGCAPGSPR                 | 2 | 1.000     |             |
|        |              |           |                                           |       |      | GDVAFVKDQTVIQNTDGNNEAWAK        | 3 | 1.000     |             |
|        |              |           |                                           |       |      | HSTVFDNLPNEDR                   | 2 | 1.000     |             |
|        |              |           |                                           |       |      | HSTVFDNLPNEDRK                  | 2 | 1.000     |             |
|        |              |           |                                           |       |      | HSTVFDNLPNEDRK                  | 3 | 1.000     |             |
|        |              |           |                                           |       |      | ILESQPFVSCVK                    | 2 | 1.000     |             |
|        |              |           |                                           |       |      | KENFEVLCK                       | 2 | 1.000     |             |
|        |              |           |                                           |       |      | KNYELLCGDNTR                    | 2 | 1.000     |             |
|        |              |           |                                           |       |      | KPVTDAENCLAR                    | 2 | 1.000     |             |
|        |              |           |                                           |       |      | KTYDSYLGDDYVR                   | 2 | 1.000     |             |
|        |              |           |                                           |       |      | LYKELPDQESIQR                   | 3 | 0.999     |             |
|        |              |           |                                           |       |      | MDFELYLGYEYVTLQNLNLR            | 2 | 1.000     |             |
|        |              |           |                                           |       |      | NYELLCGDNTR                     | 2 | 1.000     |             |
|        |              |           |                                           |       |      | NYELLCGDNTRK                    | 2 | 0.997     |             |
|        |              |           |                                           |       |      | QDDDFGK                         | 2 | 0.958     |             |
|        |              |           |                                           |       |      | SAGWNIPMGK                      | 2 | 1.000     |             |
|        |              |           |                                           |       |      | TAGWNIPMGLLYSK                  | 2 | 1.000     |             |
|        |              |           |                                           |       |      | TSANINWNNLK                     | 1 | 0.979     |             |
|        |              |           |                                           |       |      | TSANINWNNLK                     | 2 | 1.000     |             |
|        |              |           |                                           |       |      | TSHMDCIK                        | 2 | 0.999     |             |
|        |              |           |                                           |       |      | TVGKEDVIWELLNHAQEHFGK           | 2 | 1.000     |             |
|        |              |           |                                           |       |      | TVGKEDVIWELLNHAQEHFGK           | 3 | 1.000     |             |
|        |              |           |                                           |       |      | TVDSYLGDDYVR                    | 1 | 0.992     |             |
|        |              |           |                                           |       |      | TVDSYLGDDYVR                    | 2 | 0.998     |             |
|        |              |           |                                           |       |      | WCTISTHEANK                     | 2 | 1.000     |             |
|        |              |           |                                           |       |      | WSGFSGGAIECEAENTEECIAK          | 2 | 1.000     |             |
|        |              |           |                                           |       |      | YYGYTGAFR                       | 1 | 0.982     |             |
| G3X6Q6 | G3X6Q6_BOVIN | LOC510362 | Uncharacterized protein                   | 0.999 | 1.9  | IRGGPDLRASQAFAR                 | 3 | 0.999     | 1,191,906   |
| G3X6R0 | G3X6R0_BOVIN | Bt.8395   | Uncharacterized protein (Fragment)        | 0.999 | 4.5  | SPIDVIRSPMTMAGGLFAVSKK          | 3 | 0.999     | 2,944,958   |
| G3X6S7 | G3X6S7_BOVIN |           | Uncharacterized protein                   | 0.999 | 7.6  |                                 |   |           | 259,202     |
| G5E6D0 | G5E6D0_BOVIN |           | Uncharacterized protein                   | 0.999 | 13.6 |                                 |   |           | 1,372,700   |
| G3X6V1 | G3X6V1_BOVIN | Bt.43318  | Uncharacterized protein (Fragment)        | 0.999 | 5.6  | VIAYSGGCEAFVDGTALIK             | 3 | 0.999     | 72,959      |
| G3X6V3 | G3X6V3_BOVIN |           | Uncharacterized protein (Fragment)        | 0.999 | 2.9  | AIMLGARPPKNSYVNYK               | 3 | 0.999     | 1,372,700   |
|        |              |           |                                           |       |      | KPSQSSSEDLKNNVTAPTK             | 3 | 0.999     | 1,982,117   |
|        |              |           |                                           |       |      | SATLPAMPLPQVPEPAEPVWFSLAKK      | 3 | 0.999     | 392,479     |
| P46197 | ANPRB_BOVIN  | NPR2      | Atrial natriuretic peptide receptor 2     | 0.999 | 2.4  |                                 |   |           | 5,818,829   |
| G3X6W7 | G3X6W7_BOVIN | NPR2      | Uncharacterized protein                   | 0.999 | 4.0  |                                 |   |           | 595,156     |
|        |              |           |                                           |       |      | ALPVDLRFVSSSELDGACSEYLAPLR      | 3 | 0.999     | 8,026,592   |
| G3X6X1 | G3X6X1_BOVIN |           | Uncharacterized protein                   | 0.999 | 4.5  |                                 |   |           | 848,164     |
| G3X6Y3 | G3X6Y3_BOVIN | Bt.37071  | Uncharacterized protein                   | 0.999 | 1.4  | YTTNSSADHRVRLDLGLWDK            | 3 | 0.999     | 4,717,567   |
| G3X6Z0 | G3X6Z0_BOVIN | NELF      | Uncharacterized protein                   | 0.999 | 3.6  | TGTASVHKVTKIDENDASK             | 3 | 0.999     | 627,904     |
| G3X742 | G3X742_BOVIN | LOC511936 | Uncharacterized protein                   | 0.999 | 5.6  | ENLFSQQTATTMQAVFR               | 3 | 0.999     | 2,362,474   |
| G3X743 | G3X743_BOVIN | RNPEP     | Uncharacterized protein (Fragment)        | 1.000 | 4.2  | TSTCCQLYNIFRIMSFLPGQHALFSK      | 3 | 0.999     | 218,018,429 |
| G3X749 | G3X749_BOVIN | ZNF503    | Uncharacterized protein                   | 0.999 | 3.9  | AINAMPTSAWKTYQLVYFLDK           | 3 | 0.999     | 8,375,637   |
| G3X757 | G3X757_BOVIN | Bt.49331  | Uncharacterized protein                   | 0.999 | 2.9  | PFVHAVPPSDPLRQANRLPIK           | 3 | 0.999     | 1,415,425   |
| Q3ZBT1 | TERA_BOVIN   | VCP       | Transitional endoplasmic reticulum ATPase | 0.999 | 2.9  |                                 |   |           | 274,752     |
| G3X771 | G3X771_BOVIN | ABCB1     | Uncharacterized protein (Fragment)        | 0.999 | 1.9  | PNRLVDEAINEANSVLSQPK            | 3 | 0.999     | 3,913,292   |
| G3X7A5 | G3X7A5_BOVIN | Bt.19562  | Uncharacterized protein                   | 1.000 | 32.3 | NTTGALTTRLNDAQVKGAGSR           | 3 | 0.999     | 595,799     |
| Q2UVX4 | CO3_BOVIN    | C3        | Complement C3                             | 1.000 | 32.3 |                                 |   |           | 77,938,060  |
|        |              |           |                                           |       |      | AAYYNHFISDGVK                   | 2 | 0.997     | 4,329,466   |
|        |              |           |                                           |       |      | AFLDCCCEYITQLR                  | 2 | 1.000     |             |
|        |              |           |                                           |       |      | AGDFLENHYR                      | 2 | 0.996     |             |
|        |              |           |                                           |       |      | AGQYSSDLR                       | 2 | 0.973     |             |
|        |              |           |                                           |       |      | AGQYSSDLR                       | 2 | 1.000     |             |
|        |              |           |                                           |       |      | AGQYSSDLR                       | 3 | 1.000     |             |
|        |              |           |                                           |       |      | AQFILQGDACVK                    | 2 | 0.998     |             |
|        |              |           |                                           |       |      | AYYEDSPQVFSAEFEVK               | 2 | 1.000     |             |
|        |              |           |                                           |       |      | DICEAQVNSLGR                    | 2 | 0.998     |             |
|        |              |           |                                           |       |      | DPLTITVR                        | 2 | 0.996     |             |
|        |              |           |                                           |       |      | DSITTWEILAVLSDDK                | 3 | 0.999     |             |
|        |              |           |                                           |       |      | EEVPAADLSDQVDPTESETK            | 2 | 1.000     |             |
|        |              |           |                                           |       |      | EPGQDLVPLTITSDFIPIFR            | 2 | 1.000     |             |
|        |              |           |                                           |       |      | EVVADSVVVDVK                    | 2 | 1.000     |             |
|        |              |           |                                           |       |      | EYVLPSEFVLEPEEK                 | 2 | 0.939     |             |
|        |              |           |                                           |       |      | FYIDDPDGLK                      | 2 | 1.000     |             |
|        |              |           |                                           |       |      | GICVADPYEVTVMQDFIDLR            | 2 | 0.951     |             |
|        |              |           |                                           |       |      | GSMLDICTK                       | 2 | 0.998     |             |
|        |              |           |                                           |       |      | HIPVVTQGSNVQSLTQDDGVAK          | 2 | 1.000     |             |
|        |              |           |                                           |       |      | HIPVVTQGSNVQSLTQDDGVAK          | 3 | 1.000     |             |
|        |              |           |                                           |       |      | HQQTITIPAR                      | 2 | 1.000     |             |
|        |              |           |                                           |       |      | ILLQGTTPVAQMTEDAIDGER           | 2 | 1.000     |             |
|        |              |           |                                           |       |      | ILLQGTTPVAQMTEDAIDGER           | 3 | 1.000     |             |
|        |              |           |                                           |       |      | ISYIIGK                         | 2 | 0.958     |             |
|        |              |           |                                           |       |      | KDYDTTPPVVR                     | 2 | 1.000     |             |
|        |              |           |                                           |       |      | KGYTQQLAFR                      | 3 | 0.996     |             |
|        |              |           |                                           |       |      | KLEDDFDEYIMVIENIK               | 2 | 1.000     |             |
|        |              |           |                                           |       |      | KLEDDFDEYIMVIENIK               | 3 | 0.999     |             |
|        |              |           |                                           |       |      | KQVLSNIENTQLNSNGYLSVTIK         | 3 | 0.996     |             |
|        |              |           |                                           |       |      | LEDDFDEYIMVIENIK                | 2 | 1.000     |             |
|        |              |           |                                           |       |      | NYAGVFTDAGLTLK                  | 2 | 1.000     |             |
|        |              |           |                                           |       |      | QVLSNIENTQLNSNGYLSVTIK          | 2 | 1.000     |             |
|        |              |           |                                           |       |      | SOFPESWLWTVIDLK                 | 2 | 1.000     |             |
|        |              |           |                                           |       |      | TLNPEHLGGGVQR                   | 2 | 1.000     |             |
|        |              |           |                                           |       |      | TSQLETQQR                       | 2 | 0.970     |             |
|        |              |           |                                           |       |      | VELKPGETLNVNFHLR                | 3 | 1.000     |             |
|        |              |           |                                           |       |      | VELLYNPAFCSLATAK                | 2 | 1.000     |             |
|        |              |           |                                           |       |      | VFALANLIAIDSK                   | 2 | 1.000     |             |
|        |              |           |                                           |       |      | VGLVAVDK                        | 2 | 0.995     |             |
|        |              |           |                                           |       |      | VHOYFNVGLIQPGAIVK               | 2 | 1.000     |             |

|        |              |              |                                                  |       |                                     |     |       |            |            |
|--------|--------------|--------------|--------------------------------------------------|-------|-------------------------------------|-----|-------|------------|------------|
|        |              |              |                                                  |       | VHQYFNVGLIQPGAVK                    | 3   | 1.000 |            |            |
|        |              |              |                                                  |       | VPINDNGEAILKR                       | 3   | 0.995 |            |            |
|        |              |              |                                                  |       | VSHTVEDCLSFK                        | 2   | 0.999 |            |            |
|        |              |              |                                                  |       | VSHTVEDCLSFK                        | 3   | 1.000 |            |            |
|        |              |              |                                                  |       | VSIRPAPETVK                         | 2   | 0.999 |            |            |
|        |              |              |                                                  |       | YLGDQDATMSLIDISMMTGFSPDVEDLK        | 2   | 1.000 |            |            |
| G3X7B5 | G3X7B5_BOVIN | AKT1         | Uncharacterized protein                          | 0.999 | VGGAGKEAGGAGVGGGER                  | 3   | 0.999 | 2,783,724  | 264,327    |
| G3X7E3 | G3X7E3_BOVIN | Bt.90677     | Uncharacterized protein                          | 0.999 | EEVEKESDVLESASSHSLSTK               | 3   | 0.999 | 5,254,755  | 648,635    |
|        |              |              |                                                  |       | SEGNEKGEAEVLETMPGSLK                | 3   | 0.999 |            |            |
| G3X7F8 | G3X7F8_BOVIN |              | Uncharacterized protein (Fragment)               | 0.999 | RPOEGLSQADFPPLGPVSTVHGGR            | 3   | 0.999 | 3,736,809  | 577,950    |
| G3X7G5 | G3X7G5_BOVIN | Bt.14161     | Uncharacterized protein                          | 0.999 | RHDVSVVWVSSQSCYVWR                  | 3   | 0.999 | 19,416,917 | 1,626,293  |
| G3X7H4 | G3X7H4_BOVIN | LOC530538    | Uncharacterized protein (Fragment)               | 0.999 | TMDGFLTYLMR                         | 3   | 0.999 | 3,423,563  | 399,091    |
| G3X7K8 | G3X7K8_BOVIN |              | Uncharacterized protein (Fragment)               | 0.999 | EEGLMEAQFVWEEKEVEVEEVEVR            | 3   | 0.999 | 2,121,525  | 243,749    |
| G3X7M7 | G3X7M7_BOVIN | Bt.76574     | Uncharacterized protein (Fragment)               | 0.999 |                                     | 2.2 |       | 3,116,627  | 405,683    |
| G3X8F8 | G3X8F8_BOVIN | Bt.76574     | Uncharacterized protein (Fragment)               | 0.999 |                                     | 1.8 |       | 3,116,627  | 405,683    |
| G3X7R9 | G3X7R9_BOVIN | BRF1         | Uncharacterized protein (Fragment)               | 0.999 | PFRCADCGKAFSTSSSLCQHK               | 3   | 0.999 | 8,617,375  | 602,576    |
| G3X7T5 | G3X7T5_BOVIN | Bt.43709     | Uncharacterized protein                          | 0.999 | TAHVVAACLVLVCRTEGTPR                | 3   | 0.999 | 3,191,637  | 637,624    |
| G3X7Z2 | G3X7Z2_BOVIN | Bt.286       | Uncharacterized protein                          | 0.987 | GTPAALMCPNNGATKSK                   | 3   | 0.999 | 13,246,515 | 8,706,306  |
|        |              |              |                                                  |       | GGGAGVAGGPGGGLQPGQRLVYK             | 3   | 0.885 |            |            |
| G3X834 | G3X834_BOVIN | LOC783410    | Uncharacterized protein (Fragment)               | 0.999 | PEGGEAGEGADPPRRHR                   | 3   | 0.856 | 787,882    | 111,157    |
| G3X872 | G3X872_BOVIN | Q58D79       | Uncharacterized protein                          | 0.999 | THTGKPYVCGDCGQSFQSVLTHOR            | 3   | 0.999 | 1,955,140  | 266,768    |
| Q58D79 | RPH3L_BOVIN  | RPH3AL       | Rab effector Noc2                                | 0.999 |                                     | 8.2 |       | 1,955,140  | 266,768    |
| G3X898 | G3X898_BOVIN |              | Uncharacterized protein (Fragment)               | 0.999 | GRVVSDDSDSDSDSSSLDDRLR              | 3   | 0.999 | 2,915,854  | 317,202    |
| G3X8E2 | G3X8E2_BOVIN | VPS4A        | Uncharacterized protein (Fragment)               | 0.999 | SFETPQTFFSQGLQISSFANR               | 3   | 0.999 | 755,449    | 98,115     |
| G3X8E4 | G3X8E4_BOVIN | Bt.36170     | Uncharacterized protein                          | 0.999 | LLEPVCMDSMLRSLATRTPTVNAEDLLK        | 3   | 0.999 | 1,680,713  | 335,399    |
| G3X8E7 | G3X8E7_BOVIN | Bt.97853     | Uncharacterized protein                          | 0.999 | MGATDVTVTVNVSQVSSAGR                | 3   | 0.999 | 4,143,533  | 467,954    |
| G3X8G2 | G3X8G2_BOVIN | LOC787071    | Uncharacterized protein                          | 0.999 | DVNALVEEYEGTSALKELSLQASVARPEAR      | 3   | 0.999 | 1,022,977  | 152,111    |
| P98201 | NFAC1_BOVIN  | NFATC1       | Nuclear factor of activated T-cells, cytoplasmic | 0.999 | ILVWLKIPSAAGK                       | 3   | 0.999 | 4,794,617  | 760,468    |
| G3XCF6 | G3XCF6_BOVIN | NFATC1       | Uncharacterized protein                          | 0.999 | SAQELPLVEKQSAASGVLGGKR              | 3   | 0.999 | 4,794,617  | 760,468    |
| G5E510 | G5E510_BOVIN | Bt.20342     | Uncharacterized protein (Fragment)               | 0.999 | VVDVGGQPAKMPVAQLDCLNRDNYIR          | 3   | 0.999 | 1,448,804  | 219,671    |
| G5E534 | G5E534_BOVIN | RPIA         | Uncharacterized protein                          | 0.999 | AGGAASGGGNSWVPGSHVQLPGRSQFAGSTSTGVR | 3   | 0.999 | 3,596,366  | 961,403    |
| G5E537 | G5E537_BOVIN |              | Uncharacterized protein                          | 0.999 | CFVEVTEEGTEAAAATGVGVRVLSAPFR        | 3   | 0.999 | 1,676,782  | 310,534    |
| G5E571 | G5E571_BOVIN | Bt.14294     | Uncharacterized protein (Fragment)               | 0.999 |                                     | 6.6 |       | 1,530,590  | 97,016     |
| Q2TBU3 | GOSR1_BOVIN  | GOSR1        | Golgi SNAP receptor complex member 1             | 0.999 |                                     | 6.4 |       | 1,530,590  | 97,016     |
| G5E575 | G5E575_BOVIN | Bt.27578     | Uncharacterized protein (Fragment)               | 0.914 | ENMNTSORGMKLSIQSK                   | 3   | 0.999 | 1,693,668  | 135,829    |
| G5E580 | G5E580_BOVIN | Bt.67708     | Uncharacterized protein                          | 0.999 | NPALLNDIK                           | 2   | 0.914 | 1,844,215  | 264,483    |
|        |              |              |                                                  |       | IPNHVEIDEDCEKDEDSSSLCSQKGGVVK       | 3   | 0.999 |            |            |
| G5E581 | G5E581_BOVIN | GPR143       | Uncharacterized protein                          | 0.999 | PIFKDIGSLDVGDRFSPLYK                | 3   | 0.999 | 1,729,458  | 235,008    |
| G5E5A7 | G5E5A7_BOVIN | MUC5B        | Uncharacterized protein                          | 0.999 | AFHALCLGSGALRLALGLLQRLPGR           | 3   | 0.999 | 6,782,208  | 718,756    |
| G5E5C1 | G5E5C1_BOVIN |              | Uncharacterized protein                          | 0.999 | LVNTSSYLEACRHLCHCSR                 | 3   | 0.999 |            |            |
| G5E5D5 | G5E5D5_BOVIN | Bt.72941     | Uncharacterized protein                          | 0.993 | VNESWFLDCTVAR                       | 3   | 0.999 | 7,111,788  | 516,386    |
| G5E5D8 | G5E5D8_BOVIN | LOC100296237 | Uncharacterized protein                          | 0.999 | HKSGSLSSRESAFSSPISVSK               | 3   | 0.999 | 22,090,025 | 2,573,214  |
| G5E5F8 | G5E5F8_BOVIN | LOC615274    | Uncharacterized protein (Fragment)               | 0.999 | LPWVESGTSSTSEVDNLNDKIITVFKK         | 3   | 0.817 |            |            |
| G5E5H5 | G5E5H5_BOVIN | Bt.87808     | Uncharacterized protein (Fragment)               | 0.999 | YLNNCYKAAQAAASKAAASLTANR            | 3   | 0.959 | 1,887,520  | 172,489    |
| G5E5J6 | G5E5J6_BOVIN | Bt.106509    | Uncharacterized protein                          | 0.999 | QQVEEFVLRFLFKK                      | 3   | 0.999 | 4,600,408  | 532,258    |
| G5E5L9 | G5E5L9_BOVIN | IQSEC3       | Uncharacterized protein (Fragment)               | 0.999 | SVVNVGIDLENVPPRTENEVR               | 3   | 0.999 | 507,016    | 66,421     |
| G5E5M1 | G5E5M1_BOVIN | Bt.20639     | Uncharacterized protein                          | 0.999 | TSAECGDGDTDSPTHK                    | 3   | 0.999 | 1,610,172  | 212,814    |
| G5E5N3 | G5E5N3_BOVIN | Bt.5544      | Uncharacterized protein                          | 0.999 | TCCPAVPKQKENTSLGLISTHSLKEPKGK       | 3   | 0.999 | 3,789,429  | 438,834    |
| Q28141 | DHX9_BOVIN   | DHX9         | ATP-dependent RNA helicase A                     | 0.999 | ALLEGCSLAGLPLVR                     | 3   | 0.999 | 407,642    | 69,102     |
| G5E5Q5 | G5E5Q5_BOVIN | Bt.106548    | Uncharacterized protein                          | 0.999 | KHSDNEAESIADLSTSNILASEFFEEEEK       | 3   | 0.999 | 3,078,446  | 358,458    |
| G5E5Q9 | G5E5Q9_BOVIN | USP26        | Uncharacterized protein                          | 0.999 | GSYVGGGGVGGGGGFRGLSRGGYR            | 3   | 0.999 | 66,265,638 | 23,789,859 |
| G5E5S3 | G5E5S3_BOVIN | KIF14        | Uncharacterized protein (Fragment)               | 0.932 | YNSTFLGPPVMLGHGLYTFEMLSSWRK         | 3   | 0.999 | 1,165,693  | 164,896    |
| G5E5S5 | G5E5S5_BOVIN | NAV1         | Uncharacterized protein                          | 0.999 | LSENIYFTFLSEAEYKDDPYWDR             | 3   | 0.999 | 2,286,131  | 671,106    |
| G5E5T7 | G5E5T7_BOVIN |              | Uncharacterized protein (Fragment)               | 0.913 | GENGQRKQTLR                         | 3   | 0.829 | 4,611,750  | 900,563    |
| G5E5V6 | G5E5V6_BOVIN | CGNL1        | Uncharacterized protein                          | 0.999 | QNSSDSISSLSNITSHSSISSGKEADAK        | 3   | 0.999 | 55,927,167 | 5,481,773  |
| G5E5W1 | G5E5W1_BOVIN | Bt.1262      | Uncharacterized protein                          | 0.999 | SHTGERPYACSQCGK                     | 3   | 0.828 | 7,310,540  | 341,974    |
| G5E5W4 | G5E5W4_BOVIN | CNTNAP4      | Uncharacterized protein (Fragment)               | 0.999 | PLPTPSLOAHLEAKTR                    | 3   | 0.999 |            |            |
| G5E5X7 | G5E5X7_BOVIN | PANX2        | Uncharacterized protein (Fragment)               | 0.915 | SRAAGSTQGNQASNSSEVK                 | 3   | 0.999 | 4,690,739  | 391,276    |
| G5E5Y0 | G5E5Y0_BOVIN | Bt.70051     | Uncharacterized protein                          | 0.999 | EQCIPLGMASGRIRDQITASGQYQGWAPK       | 3   | 0.999 | 2,896,213  | 253,138    |
| G5E601 | G5E601_BOVIN | Bt.81454     | Uncharacterized protein                          | 1.000 | ISSSSNNLMLPLTIPSKLSAGTKK            | 3   | 0.999 |            |            |
| G5E628 | G5E628_BOVIN | Bt.62986     | Uncharacterized protein                          | 0.927 | SLQLNGEALDLEER                      | 3   | 0.999 | 8,973,325  | 1,834,853  |
| G5E671 | G5E671_BOVIN |              | Uncharacterized protein (Fragment)               | 0.999 | LTSELNLLQEQIDNCYHR                  | 2   | 0.915 | 2,547,927  | 554,265    |
| Q0VCK5 | AP2A2_BOVIN  | AP2A2        | AP-2 complex subunit alpha-2                     | 0.999 | ITPSHAMKITAYK                       | 3   | 0.999 | 1,403,162  | 206,291    |
| G5E675 | G5E675_BOVIN | AP2A2        | Uncharacterized protein (Fragment)               | 0.999 | QLEDCLLQTLHLSKTNTR                  | 3   | 0.999 | 5,615,058  | 532,185    |
| G5E677 | G5E677_BOVIN | Bt.45170     | Uncharacterized protein                          | 0.999 | FKSQTDQLVLIFAGKILK                  | 3   | 0.805 | 5,117,454  | 614,866    |
| G5E6A5 | G5E6A5_BOVIN | Bt.97476     | Uncharacterized protein (Fragment)               | 0.999 | AQVDVQMGIHPVGVSPQRPR                | 3   | 0.999 | 1,495,510  | 309,236    |
| G5E6J5 | G5E6J5_BOVIN | TUBAL3       | Uncharacterized protein (Fragment)               | 0.999 | IIGFSGALLLEVDNPNANFVAGIIHTR         | 3   | 0.999 | 1,495,510  | 309,236    |
| Q3T0F4 | RS10_BOVIN   | RPS10        | 40S ribosomal protein S10                        | 0.999 | SDSQLKNADVELQQRAVEYLR               | 3   | 0.999 | 601,585    | 153,221    |
|        |              |              |                                                  |       | MGANTSSKPPVFDENDVNFDFEILRAIGK       | 3   | 0.999 | 11,173,867 | 1,061,511  |
|        |              |              |                                                  |       | VSAPIVSIRVGTGFSASK                  | 3   | 0.999 | 2,687,500  | 260,042    |
|        |              |              |                                                  |       | VGINDRPPPREVPGDGLAEVQR              | 3   | 0.999 | 12,844,694 | 380,667    |

|          |              |              |                                                 |       |                              |   |            |               |
|----------|--------------|--------------|-------------------------------------------------|-------|------------------------------|---|------------|---------------|
| G5E6M8   | G5E6M8_BOVIN | RPS10        | Uncharacterized protein                         | 0.999 | 12.2                         |   | 12,844,694 | 380,667       |
| G5E6N7   | G5E6N7_BOVIN | CBX1         | Uncharacterized protein                         | 0.999 | DVHMPEKPELADKNVPLHVMK        | 3 | 0.999      | 5,316,342     |
| G5E6S7   | G5E6S7_BOVIN | LOC100296460 | Uncharacterized protein                         | 0.999 | 15.1                         | 3 | 0.999      | 997,946       |
| Q2TBX8   | Q2TBX8_BOVIN | RABGEF1      | RABGEF1 protein                                 | 0.999 | NSDEADLPVAKVAVKCPQVVISFYEEER | 3 | 0.999      | 3,586,823     |
| O18973   | RABX5_BOVIN  | RABGEF1      | Rab5 GDP/GTP exchange factor                    | 0.999 | 7.7                          | 3 | 0.999      | 291,737       |
| O46375   | TTHY_BOVIN   | TTR          | Transthyretin                                   | 1.000 | GEETEGGGSPHFSARSQVPPGHCPAPRR | 3 | 0.999      | 3,586,823     |
|          |              |              |                                                 |       | 4.9                          | 3 | 0.999      | 291,737       |
|          |              |              |                                                 |       | 4.9                          | 3 | 0.999      | 3,586,823     |
|          |              |              |                                                 |       | NEPASADDFLPTLIYVILKGNPPR     | 3 | 0.999      | 35,032,365    |
|          |              |              |                                                 |       | 66.7                         | 2 | 1.000      | 2,703,629     |
|          |              |              |                                                 |       | AADETWEFFASGK                | 2 | 1.000      |               |
|          |              |              |                                                 |       | GSPAANVGVK                   | 1 | 0.952      |               |
|          |              |              |                                                 |       | HYTIALLSPPSYSTTALVSSPK       | 2 | 1.000      |               |
|          |              |              |                                                 |       | KAADTWEFFASGK                | 2 | 1.000      |               |
|          |              |              |                                                 |       | SLGISPFHFAEWVFTANDSGPR       | 2 | 1.000      |               |
|          |              |              |                                                 |       | TSESGELHGLTTEDEK             | 2 | 1.000      |               |
|          |              |              |                                                 |       | TSESGELHGLTTEDEK             | 3 | 1.000      |               |
|          |              |              |                                                 |       | TSESGELHGLTTEDEKFEVGLYK      | 2 | 1.000      |               |
|          |              |              |                                                 |       | TSESGELHGLTTEDEKFEVGLYK      | 3 | 1.000      |               |
|          |              |              |                                                 |       | VELDTK                       | 1 | 0.933      |               |
| O46629   | ECHB_BOVIN   | HADHB        | Trifunctional enzyme subunit beta, mitochondria | 0.999 | 5.7                          | 3 | 0.999      | 2,488,313     |
| O46680   | TGFR1_BOVIN  | TGFR1        | TGF-beta receptor type-1                        | 0.999 | 5.6                          | 3 | 0.999      | 3,268,705     |
| O77834   | PRDX6_BOVIN  | PRDX6        | Peroxiredoxin-6                                 | 0.999 | 11.6                         | 3 | 0.999      | 3,320,200     |
| O97817-2 | LPHN2_BOVIN  | LPHN2        | Isoform 2 of Latrophilin-2                      | 0.999 | 3.4                          | 3 | 0.999      | 2,241,324     |
| O97817-3 | LPHN2_BOVIN  | LPHN2        | Isoform 3 of Latrophilin-2                      | 0.999 | 3.4                          | 3 | 0.999      | 284,785       |
| O97817-4 | LPHN2_BOVIN  | LPHN2        | Isoform 4 of Latrophilin-2                      | 0.999 | 3.4                          | 3 | 0.999      | 2,241,324     |
|          |              |              |                                                 |       | AKPEGTDSVYSQLTAEAEHLQSPNR    | 3 | 0.999      | 284,785       |
| P00257   | ADX_BOVIN    | FDX1         | Adrenodoxin, mitochondria                       | 0.999 | 12.4                         | 3 | 0.999      | 2,046,431     |
| P00735   | THRB_BOVIN   | F2           | Prothrombin                                     | 1.000 | 12.4                         | 3 | 0.999      | 192,768       |
|          |              |              |                                                 |       | TLVSGRAQSSSEDKITVHFNR        | 3 | 0.999      | 11,657,631    |
|          |              |              |                                                 |       | CLAWSSEQAK                   | 2 | 0.959      |               |
|          |              |              |                                                 |       | LGEDPDPDAIEGR                | 2 | 0.999      |               |
|          |              |              |                                                 |       | SPOELLCGASLISR               | 2 | 1.000      |               |
|          |              |              |                                                 |       | VTVEVIPR                     | 2 | 0.989      |               |
| P00761   | TRYP_PIG     | Trypsin      | Trypsin                                         | 1.000 | 47.6                         | 1 | 0.969      | 465,943,647   |
|          |              |              |                                                 |       | APVLSDSCK                    | 2 | 0.999      | 51,080,661    |
|          |              |              |                                                 |       | IITHPNFNGNTLNDIMLIK          | 2 | 1.000      |               |
|          |              |              |                                                 |       | IITHPNFNGNTLNDIMLIK          | 3 | 1.000      |               |
|          |              |              |                                                 |       | IITHPNFNGNTLNDIMLIKSSPATLNSR | 3 | 1.000      |               |
|          |              |              |                                                 |       | LGEHNIDVLEGNQFINAAK          | 2 | 1.000      |               |
|          |              |              |                                                 |       | LGEHNIDVLEGNQFINAAK          | 3 | 1.000      |               |
|          |              |              |                                                 |       | SSGSSVPSLLCGLK               | 2 | 1.000      |               |
|          |              |              |                                                 |       | SSYPGQITNMICVGLFEGGK         | 2 | 1.000      |               |
|          |              |              |                                                 |       | VCNYYNVIQQTIAAN              | 2 | 1.000      |               |
| P01035   | CYTC_BOVIN   | CST3         | Cystatin-C                                      | 0.999 | 19.6                         | 3 | 0.999      | 414,635       |
| P01044   | KNG1_BOVIN   | KNG1         | Kininogen-1                                     | 1.000 | 14.8                         | 3 | 0.999      | 145,339       |
|          |              |              |                                                 |       | AVDAALTK                     | 1 | 0.944      | 6,270,055     |
|          |              |              |                                                 |       | DFVQPTR                      | 2 | 0.840      | 477,241       |
|          |              |              |                                                 |       | ESHDFDLVDALL                 | 2 | 0.925      |               |
|          |              |              |                                                 |       | LCAGCPKPIPVDSPLDPEPLSHSIK    | 3 | 0.999      |               |
|          |              |              |                                                 |       | LISDFPETSPPK                 | 2 | 0.914      |               |
|          |              |              |                                                 |       | SPDLEPVLR                    | 2 | 0.990      |               |
|          |              |              |                                                 |       | VYPTVNCQPLGQTSMLK            | 2 | 1.000      |               |
| P01044-2 | KNG1_BOVIN   | KNG1         | Isoform LMW of Kininogen-1                      | 1.000 | 9.6                          | 3 | 0.999      | 3,210,769     |
|          |              |              |                                                 |       | AVDAALTK                     | 1 | 0.944      | 305,149       |
|          |              |              |                                                 |       | DFVQPTR                      | 2 | 0.840      |               |
|          |              |              |                                                 |       | SPDLEPVLR                    | 2 | 0.990      |               |
|          |              |              |                                                 |       | VYPTVNCQPLGQTSMLK            | 2 | 1.000      |               |
| P01045   | KNG2_BOVIN   | KNG2         | Kininogen-2                                     | 1.000 | 7.4                          | 3 | 0.999      | 3,168,734     |
|          |              |              |                                                 |       | AVDAALTK                     | 1 | 0.944      | 290,637       |
|          |              |              |                                                 |       | LISDFPETSPPK                 | 2 | 0.914      |               |
|          |              |              |                                                 |       | SPDLEPVLR                    | 2 | 0.990      |               |
|          |              |              |                                                 |       | VYPTVNCQPLGQTSMLK            | 2 | 1.000      |               |
| P01045-2 | KNG2_BOVIN   | KNG2         | Isoform LMW of Kininogen-2                      | 1.000 | 7.8                          | 3 | 0.999      | 2,164,138     |
|          |              |              |                                                 |       | AVDAALTK                     | 1 | 0.944      | 237,981       |
|          |              |              |                                                 |       | SPDLEPVLR                    | 2 | 0.990      |               |
|          |              |              |                                                 |       | VYPTVNCQPLGQTSMLK            | 2 | 1.000      |               |
| P01211   | PENK_BOVIN   | PENK         | Proenkephalin-A                                 | 0.999 | 7.6                          | 3 | 0.999      | 568,533       |
| P01268   | PTHY_BOVIN   | PTH          | Parathyroid hormone                             | 0.999 | 15.7                         | 3 | 0.999      | 7,045,142     |
| P01966   | HBA_BOVIN    | HBA          | Hemoglobin subunit alpha                        | 1.000 | 62.7                         | 3 | 0.999      | 3,783,512     |
|          |              |              |                                                 |       | FLANVSTVLSK                  | 2 | 1.000      | 27,625,179    |
|          |              |              |                                                 |       | LLSHLLVTLASHLPSDFTPAVHASLDK  | 3 | 1.000      | 1,756,960     |
|          |              |              |                                                 |       | LRVDVNFK                     | 3 | 1.000      |               |
|          |              |              |                                                 |       | MFLSFTLK                     | 2 | 0.999      |               |
|          |              |              |                                                 |       | TYFPFDLSHGSAQVK              | 3 | 1.000      |               |
|          |              |              |                                                 |       | VGGHAAEYGAELER               | 2 | 1.000      |               |
|          |              |              |                                                 |       | VGGHAAEYGAELER               | 3 | 1.000      |               |
| P02465   | COL1A2_BOVIN | COL1A2       | Collagen alpha-2(I) chain                       | 0.999 | 3.3                          | 3 | 0.861      | 4,654,683     |
|          |              |              |                                                 |       | GAAGIPGGKGEKGETLRL           | 3 | 0.861      | 576,838       |
| P02662   | CASA1_BOVIN  | CSN1S1       | Alpha-S1-casein                                 | 1.000 | 17.3                         | 3 | 0.999      | 10,643,312    |
|          |              |              |                                                 |       | FFVAPFPEVFGK                 | 2 | 0.997      | 498,675       |
|          |              |              |                                                 |       | HQGLPQELVNLNLLR              | 2 | 0.999      |               |
|          |              |              |                                                 |       | YLGYLEQLLR                   | 2 | 0.999      |               |
| P02663   | CASA2_BOVIN  | CSN1S2       | Alpha-S2-casein                                 | 0.999 | 5.0                          | 3 | 0.999      | 4,490,696     |
|          |              |              |                                                 |       | ALNEINQFYQK                  | 2 | 0.999      | 649,893       |
| P02699   | OPSD_BOVIN   | RHO          | Rhodopsin                                       | 0.999 | 4.0                          | 3 | 0.999      | 3,154,392     |
|          |              |              |                                                 |       | NPLGDDEASTTVSK               | 3 | 0.999      | 497,179       |
| P02709   | ACHA_BOVIN   | CHRNA1       | Acetylcholine receptor subunit alpha            | 0.999 | 4.2                          | 3 | 0.999      | 24,778,404    |
| P02769   | ALBU_BOVIN   | ALB          | Serum albumin                                   | 1.000 | 78.9                         | 3 | 0.999      | 505,821       |
|          |              |              |                                                 |       | AEFVEVTK                     | 1 | 0.975      | 4,400,683,762 |
|          |              |              |                                                 |       | AEFVEVTK                     | 2 | 0.998      | 61,316,238    |
|          |              |              |                                                 |       | AEFVEVTKLVTDLTK              | 2 | 0.968      |               |
|          |              |              |                                                 |       | ATEEQLKTVMENFAVFDK           | 3 | 0.998      |               |
|          |              |              |                                                 |       | CCAADDKEACFAVEGPK            | 2 | 1.000      |               |
|          |              |              |                                                 |       | CCTESLVNR                    | 1 | 0.989      |               |
|          |              |              |                                                 |       | DAFLGSFLYEYSR                | 1 | 1.000      |               |
|          |              |              |                                                 |       | DAFLGSFLYEYSR                | 2 | 1.000      |               |
|          |              |              |                                                 |       | DAIPENLPPLTADFADK            | 2 | 0.993      |               |
|          |              |              |                                                 |       | DAIPENLPPLTADFADKDVCK        | 2 | 1.000      |               |
|          |              |              |                                                 |       | DDPHACYSTVFDK                | 1 | 0.984      |               |
|          |              |              |                                                 |       | DDPHACYSTVFDK                | 2 | 1.000      |               |
|          |              |              |                                                 |       | DDPHACYSTVFDK                | 3 | 1.000      |               |
|          |              |              |                                                 |       | DDPHACYSTVFDKDK              | 2 | 1.000      |               |
|          |              |              |                                                 |       | DDPHACYSTVFDKDK              | 3 | 1.000      |               |
|          |              |              |                                                 |       | DDSPDLPK                     | 1 | 0.946      |               |
|          |              |              |                                                 |       | DDSPDLPK                     | 2 | 0.928      |               |
|          |              |              |                                                 |       | DLGEEHFK                     | 1 | 0.951      |               |
|          |              |              |                                                 |       | DLGEEHFK                     | 2 | 0.996      |               |
|          |              |              |                                                 |       | ECCDKPLEK                    | 1 | 0.972      |               |
|          |              |              |                                                 |       | ECCDKPLEK                    | 2 | 0.999      |               |
|          |              |              |                                                 |       | ECCHGDLLECADDR               | 2 | 1.000      |               |
|          |              |              |                                                 |       | ECCHGDLLECADDR               | 3 | 0.994      |               |
|          |              |              |                                                 |       | ECCHGDLLECADDRDLAK           | 2 | 1.000      |               |
|          |              |              |                                                 |       | ECCHGDLLECADDRDLAK           | 3 | 1.000      |               |
|          |              |              |                                                 |       | ETYGDMADCCCK                 | 1 | 0.992      |               |

|          |             |        |                                                               |       |  |                                     |   |       |             |            |
|----------|-------------|--------|---------------------------------------------------------------|-------|--|-------------------------------------|---|-------|-------------|------------|
|          |             |        |                                                               |       |  | ETYGDMADCCCKEPPER                   | 2 | 1.000 |             |            |
|          |             |        |                                                               |       |  | ETYGDMADCCCKEPPER                   | 3 | 1.000 |             |            |
|          |             |        |                                                               |       |  | ETYGDMADCCCKEPPERNECFLSHK           | 3 | 0.995 |             |            |
|          |             |        |                                                               |       |  | EYEATLEECCAK                        | 1 | 1.000 |             |            |
|          |             |        |                                                               |       |  | EYEATLEECCAKDDPHACYSTVFDK           | 3 | 1.000 |             |            |
|          |             |        |                                                               |       |  | FKDLGEEHFK                          | 2 | 0.997 |             |            |
|          |             |        |                                                               |       |  | FKDLGEEHFK                          | 3 | 1.000 |             |            |
|          |             |        |                                                               |       |  | GLVLIAFSQYLQQCPFDEHVK               | 2 | 1.000 |             |            |
|          |             |        |                                                               |       |  | GLVLIAFSQYLQQCPFDEHVK               | 3 | 1.000 |             |            |
|          |             |        |                                                               |       |  | HLVDEPQNLK                          | 1 | 1.000 |             |            |
|          |             |        |                                                               |       |  | HLVDEPQNLK                          | 2 | 1.000 |             |            |
|          |             |        |                                                               |       |  | HPEYAVSVLLR                         | 1 | 1.000 |             |            |
|          |             |        |                                                               |       |  | HPEYAVSVLLR                         | 2 | 1.000 |             |            |
|          |             |        |                                                               |       |  | HPYFYAPELLYYANK                     | 2 | 1.000 |             |            |
|          |             |        |                                                               |       |  | HPYFYAPELLYYANK                     | 3 | 1.000 |             |            |
|          |             |        |                                                               |       |  | KOTALVELLK                          | 1 | 0.986 |             |            |
|          |             |        |                                                               |       |  | KOTALVELLK                          | 3 | 1.000 |             |            |
|          |             |        |                                                               |       |  | KVPQVSTPTLVEVSR                     | 1 | 1.000 |             |            |
|          |             |        |                                                               |       |  | KVPQVSTPTLVEVSR                     | 2 | 1.000 |             |            |
|          |             |        |                                                               |       |  | KVPQVSTPTLVEVSR                     | 3 | 1.000 |             |            |
|          |             |        |                                                               |       |  | LCVLHEK                             | 1 | 0.961 |             |            |
|          |             |        |                                                               |       |  | LCVLHEKTPVSEKVTK                    | 3 | 0.864 |             |            |
|          |             |        |                                                               |       |  | LFTFHADICTLPDTEK                    | 1 | 1.000 |             |            |
|          |             |        |                                                               |       |  | LFTFHADICTLPDTEK                    | 2 | 1.000 |             |            |
|          |             |        |                                                               |       |  | LGEYGFQNALIVR                       | 1 | 0.991 |             |            |
|          |             |        |                                                               |       |  | LGEYGFQNALIVR                       | 2 | 1.000 |             |            |
|          |             |        |                                                               |       |  | LGEYGFQNALIVR                       | 3 | 1.000 |             |            |
|          |             |        |                                                               |       |  | LKECCDKPLEK                         | 2 | 1.000 |             |            |
|          |             |        |                                                               |       |  | LKECCDKPLEK                         | 3 | 0.996 |             |            |
|          |             |        |                                                               |       |  | LKHLVDEPQNLK                        | 2 | 0.999 |             |            |
|          |             |        |                                                               |       |  | LKHLVDEPQNLK                        | 3 | 0.975 |             |            |
|          |             |        |                                                               |       |  | LKPDNTLCDEFK                        | 1 | 0.945 |             |            |
|          |             |        |                                                               |       |  | LKPDNTLCDEFK                        | 3 | 1.000 |             |            |
|          |             |        |                                                               |       |  | LSQKFPK                             | 2 | 0.954 |             |            |
|          |             |        |                                                               |       |  | LVNELTEFAK                          | 2 | 1.000 |             |            |
|          |             |        |                                                               |       |  | LVNELTEFAKCVADESHAGCEK              | 3 | 1.000 |             |            |
|          |             |        |                                                               |       |  | LVTDLTK                             | 1 | 0.830 |             |            |
|          |             |        |                                                               |       |  | LVTDLTK                             | 2 | 0.961 |             |            |
|          |             |        |                                                               |       |  | LVVSTQATAL                          | 2 | 1.000 |             |            |
|          |             |        |                                                               |       |  | MPCTEDYLSLILNR                      | 1 | 0.975 |             |            |
|          |             |        |                                                               |       |  | MPCTEDYLSLILNR                      | 3 | 1.000 |             |            |
|          |             |        |                                                               |       |  | NECFLSHK                            | 2 | 0.997 |             |            |
|          |             |        |                                                               |       |  | NECFLSHKDDSPDLPK                    | 2 | 1.000 |             |            |
|          |             |        |                                                               |       |  | NECFLSHKDDSPDLPK                    | 3 | 0.996 |             |            |
|          |             |        |                                                               |       |  | PCFSALTPDETYVPK                     | 2 | 0.999 |             |            |
|          |             |        |                                                               |       |  | QEPNTLGDDEFK                        | 2 | 0.805 |             |            |
|          |             |        |                                                               |       |  | QEPERNECFLSHK                       | 2 | 0.994 |             |            |
|          |             |        |                                                               |       |  | QEPERNECFLSHKDDSPDLPK               | 2 | 1.000 |             |            |
|          |             |        |                                                               |       |  | QNCDFEFK                            | 2 | 0.961 |             |            |
|          |             |        |                                                               |       |  | QOTALVELLK                          | 2 | 0.950 |             |            |
|          |             |        |                                                               |       |  | RHPEYAVSVLLR                        | 1 | 0.978 |             |            |
|          |             |        |                                                               |       |  | RHPEYAVSVLLR                        | 3 | 1.000 |             |            |
|          |             |        |                                                               |       |  | RHPYFYAPELLYYANK                    | 2 | 1.000 |             |            |
|          |             |        |                                                               |       |  | RHPYFYAPELLYYANK                    | 3 | 1.000 |             |            |
|          |             |        |                                                               |       |  | RPCFSALTPDETYVPK                    | 1 | 1.000 |             |            |
|          |             |        |                                                               |       |  | SHCIAEVEK                           | 1 | 0.992 |             |            |
|          |             |        |                                                               |       |  | SHCIAEVEKDAIPENLPPLTADFAEDK         | 2 | 1.000 |             |            |
|          |             |        |                                                               |       |  | SHCIAEVEKDAIPENLPPLTADFAEDK         | 3 | 1.000 |             |            |
|          |             |        |                                                               |       |  | SHCIAEVEKDAIPENLPPLTADFAEDKDVCK     | 2 | 1.000 |             |            |
|          |             |        |                                                               |       |  | SLHTLFGDELCK                        | 1 | 1.000 |             |            |
|          |             |        |                                                               |       |  | SLHTLFGDELCK                        | 3 | 1.000 |             |            |
|          |             |        |                                                               |       |  | SLHTLFGDELCKVASLR                   | 3 | 0.999 |             |            |
|          |             |        |                                                               |       |  | TCVADESHAGCEK                       | 2 | 1.000 |             |            |
|          |             |        |                                                               |       |  | TCVADESHAGCEK                       | 3 | 1.000 |             |            |
|          |             |        |                                                               |       |  | TVMENFVAFVVK                        | 1 | 1.000 |             |            |
|          |             |        |                                                               |       |  | TVMENFVAFVVK                        | 2 | 1.000 |             |            |
|          |             |        |                                                               |       |  | VHKECCHGDLLCADDR                    | 2 | 1.000 |             |            |
|          |             |        |                                                               |       |  | VHKECCHGDLLCADDR                    | 3 | 1.000 |             |            |
|          |             |        |                                                               |       |  | VHKECCHGDLLCADDRADLAK               | 2 | 1.000 |             |            |
|          |             |        |                                                               |       |  | VHKECCHGDLLCADDRADLAK               | 3 | 1.000 |             |            |
|          |             |        |                                                               |       |  | VQVSTPTLVEVSR                       | 2 | 1.000 |             |            |
|          |             |        |                                                               |       |  | VQVSTPTLVEVSR                       | 3 | 0.921 |             |            |
|          |             |        |                                                               |       |  | VTKCCESLVNR                         | 2 | 0.968 |             |            |
|          |             |        |                                                               |       |  | YICDNQDTISSK                        | 1 | 1.000 |             |            |
|          |             |        |                                                               |       |  | YICDNQDTISSK                        | 2 | 1.000 |             |            |
|          |             |        |                                                               |       |  | YNGVFQECCEAEDK                      | 1 | 1.000 |             |            |
|          |             |        |                                                               |       |  | YNGVFQECCEAEDKGAACLLPK              | 2 | 1.000 |             |            |
| P04263   | K2CA_BOVIN  |        | Keratin, type II cytoskeletal 68 kDa, component IA (Fragment) | 0.999 |  | 20.3                                |   |       | 1,330,497   | 283,714    |
| P04651   | LSHB_BOVIN  | LHB    | Lutropin subunit beta                                         | 0.999 |  | ASRGNLALDSSGGGSVAVRGSVNSGGSCAVSGVGG | 3 | 0.999 | 7,738,733   | 541,266    |
| P04985   | ELN_BOVIN   | ELN    | Elastin                                                       | 1.000 |  | RVLVPLPMPQVRVCTYHELK                | 3 | 0.999 |             |            |
| P04985-2 | ELN_BOVIN   | ELN    | Isoform 2 of Elastin                                          | 1.000 |  | 4.8                                 |   |       | 62,884      | 7,789      |
| P04985-3 | ELN_BOVIN   | ELN    | Isoform 3 of Elastin                                          | 1.000 |  | 4.9                                 |   |       | 62,884      | 7,789      |
| P04985-4 | ELN_BOVIN   | ELN    | Isoform 4 of Elastin                                          | 1.000 |  | 5.1                                 |   |       | 62,884      | 7,789      |
| P04985-5 | ELN_BOVIN   | ELN    | Isoform 5 of Elastin                                          | 1.000 |  | 4.7                                 |   |       | 62,884      | 7,789      |
| P04985-6 | ELN_BOVIN   | ELN    | Isoform 6 of Elastin                                          | 1.000 |  | 4.9                                 |   |       | 62,884      | 7,789      |
| P04985-7 | ELN_BOVIN   | ELN    | Isoform 7 of Elastin                                          | 1.000 |  | 5.0                                 |   |       | 62,884      | 7,789      |
| P05059   | CMGA_BOVIN  | CHGA   | Chromogranin-A                                                | 0.999 |  | PKAQVGAGAFAGIPGVGPFGGQQPGLGYPIKAPK  | 3 | 0.999 |             |            |
| P05363   | NK2R_BOVIN  | TACR2  | Substance-K receptor                                          | 0.999 |  | 6.0                                 |   |       | 1,066,966   | 251,533    |
| P06526   | TDT_BOVIN   | DNTT   | DNA nucleotidylexotransferase                                 | 0.999 |  | MRSAVLALLCAGQVIALPVNSPMNK           | 3 | 0.999 | 6,663,204   | 2,598,160  |
| P07224   | PROS_BOVIN  | PROS1  | Vitamin K-dependent protein S                                 | 0.999 |  | MELTYTPSLSTRVNRCHTK                 | 3 | 0.999 |             |            |
| P07507   | MGP_BOVIN   | MGP    | Matrix Gla proteir                                            | 0.911 |  | 2.2                                 |   |       | 19,390,638  | 3,409,423  |
| P08169   | MPRI_BOVIN  | IGF2R  | Cation-independent mannose-6-phosphate receptc                | 0.951 |  | VDLVMCPYENR                         | 3 | 0.999 |             |            |
| P08728   | K1C19_BOVIN | KRT19  | Keratin, type I cytoskeletal 1f                               | 0.946 |  | 2.1                                 |   |       | 1,919,972   | 561,953    |
| P0CB32   | HS71L_BOVIN | HSPA1L | Heat shock 70 kDa protein 1-like                              | 0.999 |  | LPETTRFSAEFDFR                      | 3 | 0.999 |             |            |
| P10096   | G3P_BOVIN   | GAPDH  | Glyceraldehyde-3-phosphate dehydrogenas                       | 0.999 |  | 10.7                                |   |       | 2,161,004   | 249,078    |
| P10568   | MYO1A_BOVIN | MYO1A  | Myosin-1a                                                     | 0.999 |  | NANSFISPOQR                         | 2 | 0.911 |             |            |
| P11242   | GALA_BOVIN  | GAL    | Galanin peptides                                              | 0.999 |  | 0.7                                 |   |       | 2,134,829   | 171,892    |
| P12378   | UGDH_BOVIN  | UGDH   | UDP-glucose 6-dehydrogenase                                   | 0.999 |  | SLLEFNTTVNCKQQNHK                   | 3 | 0.845 |             |            |
| P12763   | FETUA_BOVIN | AHSG   | Alpha-2-HS-glycoproleir                                       | 1.000 |  | 5.3                                 |   |       | 1,723,588   | 210,588    |
|          |             |        |                                                               |       |  | TKFETEALRMSVEADINGLR                | 3 | 0.807 |             |            |
|          |             |        |                                                               |       |  | 4.4                                 |   |       | 1,209,600   | 295,157    |
|          |             |        |                                                               |       |  | VQDLLLDVAPLSLGLLETAGGVMTVLIK        | 3 | 0.999 |             |            |
|          |             |        |                                                               |       |  | 4.2                                 |   |       | 2,102,350   | 257,348    |
|          |             |        |                                                               |       |  | LVINGKATIFQER                       | 3 | 0.999 |             |            |
|          |             |        |                                                               |       |  | 2.7                                 |   |       | 870,377     | 136,919    |
|          |             |        |                                                               |       |  | GEQVNSVKEQLQSNPVLEAFGNAKTIR         | 3 | 0.999 |             |            |
|          |             |        |                                                               |       |  | 23.6                                |   |       | 3,241,029   | 376,654    |
|          |             |        |                                                               |       |  | MPRGSVLLASLLAAALSATLGLGSPVK         | 3 | 0.999 |             |            |
|          |             |        |                                                               |       |  | 6.3                                 |   |       | 646,803     | 85,225     |
|          |             |        |                                                               |       |  | ASVGFGGSCQFKDVLNLVYLCEALNLEVAR      | 3 | 0.999 |             |            |
|          |             |        |                                                               |       |  | 53.5                                |   |       | 860,293,410 | 56,442,888 |
|          |             |        |                                                               |       |  | ALGGEQVR                            | 2 | 0.994 |             |            |
|          |             |        |                                                               |       |  | AQFVPLPVSVEFAAATDCIAK               | 2 | 1.000 |             |            |
|          |             |        |                                                               |       |  | CDSSPDSAEQVR                        | 1 | 0.954 |             |            |
|          |             |        |                                                               |       |  | CDSSPDSAEQVR                        | 2 | 1.000 |             |            |
|          |             |        |                                                               |       |  | CDSSPDSAEQVRK                       | 2 | 1.000 |             |            |
|          |             |        |                                                               |       |  | CDSSPDSAEQVRK                       | 3 | 0.999 |             |            |
|          |             |        |                                                               |       |  | CNLLAEK                             | 1 | 0.824 |             |            |
|          |             |        |                                                               |       |  | EPACDDPDTEQAALAAVDYINK              | 2 | 1.000 |             |            |
|          |             |        |                                                               |       |  | EPACDDPDTEQAALAAVDYINK              | 3 | 0.996 |             |            |
|          |             |        |                                                               |       |  | EVVDPTK                             | 1 | 0.989 |             |            |
|          |             |        |                                                               |       |  | EVVDPTK                             | 2 | 0.898 |             |            |

|        |             |          |                                                           |       |  |                                  |   |       |             |            |
|--------|-------------|----------|-----------------------------------------------------------|-------|--|----------------------------------|---|-------|-------------|------------|
|        |             |          |                                                           |       |  | EVDPTKCNLLAEK                    | 2 | 1.000 |             |            |
|        |             |          |                                                           |       |  | EVDPTKCNLLAEK                    | 3 | 0.963 |             |            |
|        |             |          |                                                           |       |  | GKHTLNQIDSVK                     | 3 | 1.000 |             |            |
|        |             |          |                                                           |       |  | HTFSGVASVESSSGEAFHV GK           | 2 | 1.000 |             |            |
|        |             |          |                                                           |       |  | HTFSGVASVESSSGEAFHV GK           | 3 | 1.000 |             |            |
|        |             |          |                                                           |       |  | HTLNQIDSVK                       | 1 | 1.000 |             |            |
|        |             |          |                                                           |       |  | HTLNQIDSVK                       | 2 | 1.000 |             |            |
|        |             |          |                                                           |       |  | HTLNQIDSVK                       | 3 | 0.974 |             |            |
|        |             |          |                                                           |       |  | QDGFQSVLFTK                      | 1 | 0.961 |             |            |
|        |             |          |                                                           |       |  | QDGFQSVLFTK                      | 2 | 1.000 |             |            |
|        |             |          |                                                           |       |  | QQTQHAVEGDCDIHVLK                | 2 | 1.000 |             |            |
|        |             |          |                                                           |       |  | QQTQHAVEGDCDIHVLK                | 3 | 1.000 |             |            |
|        |             |          |                                                           |       |  | QYGFCK                           | 1 | 0.904 |             |            |
|        |             |          |                                                           |       |  | QYGFCK                           | 2 | 0.966 |             |            |
|        |             |          |                                                           |       |  | TPVGGPSIPGQVPR                   | 1 | 0.988 |             |            |
|        |             |          |                                                           |       |  | TPVGGPSIPGQVPR                   | 2 | 1.000 |             |            |
|        |             |          |                                                           |       |  | VHAVEVALATFNAESNGSYLQLVEISR      | 2 | 1.000 |             |            |
| P13753 | HA1B_BOVIN  |          | BOLA class I histocompatibility antigen, alpha chain BL-3 | 0.999 |  | 3.6                              |   |       | 6,484,672   | 4,286,556  |
|        |             |          |                                                           |       |  | NTRYKDTAQIFR                     | 3 | 0.999 |             |            |
| P15497 | APOA1_BOVIN | APOA1    | Apolipoprotein A-I                                        | 1.000 |  | 66.4                             |   |       | 140,813,950 | 20,089,162 |
|        |             |          |                                                           |       |  | DSGRDYVAQFEASALGK                | 3 | 1.000 |             |            |
|        |             |          |                                                           |       |  | DYVAQFEASALGK                    | 2 | 1.000 |             |            |
|        |             |          |                                                           |       |  | EGGGSALAEYHAK                    | 2 | 1.000 |             |            |
|        |             |          |                                                           |       |  | EQLGPVTOEFWDNLEK                 | 2 | 1.000 |             |            |
|        |             |          |                                                           |       |  | EQLGPVTOEFWDNLEKETASLR           | 2 | 0.999 |             |            |
|        |             |          |                                                           |       |  | EQLGPVTOEFWDNLEKETASLR           | 3 | 1.000 |             |            |
|        |             |          |                                                           |       |  | LEALKEGGGSALAEYHAK               | 3 | 0.999 |             |            |
|        |             |          |                                                           |       |  | LLDNWDTLASTSK                    | 2 | 1.000 |             |            |
|        |             |          |                                                           |       |  | LSPLAQELR                        | 2 | 0.993 |             |            |
|        |             |          |                                                           |       |  | QEMHKDLEEVK                      | 2 | 0.999 |             |            |
|        |             |          |                                                           |       |  | QGLLPVLESLK                      | 2 | 1.000 |             |            |
|        |             |          |                                                           |       |  | QQLAPYSDDLK                      | 2 | 0.983 |             |            |
|        |             |          |                                                           |       |  | VAPLGEFR                         | 2 | 0.962 |             |            |
|        |             |          |                                                           |       |  | VKDFATVYVEAIK                    | 3 | 0.933 |             |            |
|        |             |          |                                                           |       |  | VQELQDKLSPLAQELR                 | 3 | 0.999 |             |            |
|        |             |          |                                                           |       |  | VQPYLDEFQKK                      | 2 | 0.977 |             |            |
|        |             |          |                                                           |       |  | VREQLGPVTOEFWDNLEK               | 2 | 1.000 |             |            |
|        |             |          |                                                           |       |  | VREQLGPVTOEFWDNLEK               | 3 | 1.000 |             |            |
|        |             |          |                                                           |       |  | VREQLGPVTOEFWDNLEKETASLR         | 3 | 1.000 |             |            |
|        |             |          |                                                           |       |  | VSILAAIDEASK                     | 2 | 1.000 |             |            |
|        |             |          |                                                           |       |  | VSILAAIDEASKK                    | 2 | 1.000 |             |            |
|        |             |          |                                                           |       |  | VSILAAIDEASKK                    | 3 | 1.000 |             |            |
|        |             |          |                                                           |       |  | WHEEVEIYR                        | 2 | 1.000 |             |            |
|        |             |          |                                                           |       |  | WHEEVEIYR                        | 3 | 0.996 |             |            |
| P17690 | APOH_BOVIN  | APOH     | Beta-2-glycoprotein 1                                     | 1.000 |  | 18.3                             |   |       | 28,380,551  | 1,077,403  |
|        |             |          |                                                           |       |  | ATVYVEGER                        | 2 | 0.935 |             |            |
|        |             |          |                                                           |       |  | FTCPITGLWPNTLK                   | 2 | 1.000 |             |            |
|        |             |          |                                                           |       |  | RATVYVEGER                       | 2 | 0.946 |             |            |
|        |             |          |                                                           |       |  | TCPKPDELFFSTVWPLKR               | 3 | 1.000 |             |            |
|        |             |          |                                                           |       |  | WSPDLVPCAPITCPPPIPK              | 2 | 1.000 |             |            |
| P17697 | CLUS_BOVIN  | CLU      | Clusterin                                                 | 1.000 |  | 11.6                             |   |       | 8,717,764   | 797,941    |
|        |             |          |                                                           |       |  | ASSIMDELFDQR                     | 2 | 1.000 |             |            |
|        |             |          |                                                           |       |  | KLLSSLEAK                        | 2 | 0.987 |             |            |
|        |             |          |                                                           |       |  | LYDQLQSYQOK                      | 2 | 1.000 |             |            |
|        |             |          |                                                           |       |  | TPYHFPTMEFTENNDR                 | 3 | 0.850 |             |            |
| P18246 | CXA1_BOVIN  | GJA1     | Gap junction alpha-1 protein                              | 0.954 |  | 5.2                              |   |       | 566,830     | 73,163     |
|        |             |          |                                                           |       |  | VVAQTDGANVDMHLKQIEIK             | 3 | 0.877 |             |            |
| P19035 | APOC3_BOVIN | APOC3    | Apolipoprotein C-II                                       | 1.000 |  | 28.1                             |   |       | 4,406,239   | 283,293    |
|        |             |          |                                                           |       |  | DALSSVOESQVAQQAR                 | 2 | 1.000 |             |            |
|        |             |          |                                                           |       |  | DWMTESFSSLK                      | 2 | 0.990 |             |            |
| P19687 | GCYA1_BOVIN | GUCY1A1  | Guanylate cyclase soluble subunit alpha-                  | 0.999 |  | 3.6                              |   |       | 16,979,533  | 5,860,304  |
|        |             |          |                                                           |       |  | EFVDQPCELYSVHIRSARPHPPPGK        | 3 | 0.999 |             |            |
| P20004 | ACON_BOVIN  | ACO2     | Aconitate hydratase, mitochondria                         | 0.999 |  | 3.0                              |   |       | 241,204     | 21,105     |
|        |             |          |                                                           |       |  | WVVGIDENYEGSSREHALEPR            | 3 | 0.999 |             |            |
| P21457 | RECO_BOVIN  | RCVRN    | Recoverin                                                 | 0.999 |  | 7.9                              |   |       | 3,505,188   | 213,998    |
|        |             |          |                                                           |       |  | FFPEADPKAYAOHVFR                 | 3 | 0.999 |             |            |
| P22439 | ODPX_BOVIN  | PDHX     | Pyruvate dehydrogenase protein X componen                 | 0.964 |  | 3.6                              |   |       | 7,454,029   | 420,645    |
|        |             |          |                                                           |       |  | PVLKLTQDEEGNAQLQQR               | 3 | 0.838 |             |            |
| P22457 | FA7_BOVIN   | F7       | Coagulation factor VII                                    | 0.999 |  | 5.8                              |   |       | 3,313,938   | 1,289,367  |
|        |             |          |                                                           |       |  | GTWFLTGWVSWGEGCAAAGHFGIYTR       | 3 | 0.999 |             |            |
| P24627 | TRFL_BOVIN  | LTF      | Lactotransferrin                                          | 0.999 |  | 2.8                              |   |       | 1,497,745   | 140,053    |
|        |             |          |                                                           |       |  | SCHTGLGRSAGWIIPMGILR             | 3 | 0.999 |             |            |
| P27117 | DCOR_BOVIN  | ODC1     | Ornithine decarboxylase                                   | 0.999 |  | 5.2                              |   |       | 11,961,754  | 1,971,787  |
|        |             |          |                                                           |       |  | PDEKYYSSSIWGPCTDGLDRIVER         | 3 | 0.999 |             |            |
| P28800 | A2AP_BOVIN  | SERPINF2 | Alpha-2-antiplasmin                                       | 1.000 |  | 29.1                             |   |       | 23,768,900  | 1,823,705  |
|        |             |          |                                                           |       |  | GFPIKEDFLEQSEQLFGAK              | 2 | 1.000 |             |            |
|        |             |          |                                                           |       |  | LCQDLGPGAFR                      | 2 | 0.999 |             |            |
|        |             |          |                                                           |       |  | LDNGEPPGGQIAPK                   | 2 | 1.000 |             |            |
|        |             |          |                                                           |       |  | LGPPSEEDYAPSPSPK                 | 2 | 1.000 |             |            |
|        |             |          |                                                           |       |  | LKEVLHADSGPCLPHLLSR              | 3 | 1.000 |             |            |
|        |             |          |                                                           |       |  | LVSSVQHQSALFESAGVAAAATSTAMSR     | 3 | 0.947 |             |            |
|        |             |          |                                                           |       |  | SKFDPNLQTR                       | 3 | 0.870 |             |            |
|        |             |          |                                                           |       |  | YQLDLVATLSQLGLQELFQAPDLR         | 3 | 0.997 |             |            |
| P29105 | HPCL1_BOVIN | HPCAL1   | Hippocalcin-like protein 1                                | 0.999 |  | 10.4                             |   |       | 7,039,713   | 508,340    |
|        |             |          |                                                           |       |  | QMDTNDGKLSLEEFKGA                | 3 | 0.999 |             |            |
| P31408 | VATB2_BOVIN | ATP6V1B2 | V-type proton ATPase subunit B, brain isoform             | 0.999 |  | 3.1                              |   |       | 7,806,417   | 1,798,320  |
|        |             |          |                                                           |       |  | TVSGVGNPLVILDHVK                 | 3 | 0.999 |             |            |
| P34955 | A1AT_BOVIN  | SERPINA1 | Alpha-1-antitrypsin                                       | 1.000 |  | 34.4                             |   |       | 523,157,939 | 14,545,118 |
|        |             |          |                                                           |       |  | AALTIDEK                         | 1 | 0.984 |             |            |
|        |             |          |                                                           |       |  | AALTIDEK                         | 2 | 0.991 |             |            |
|        |             |          |                                                           |       |  | ADLSGITK                         | 1 | 0.971 |             |            |
|        |             |          |                                                           |       |  | ADLSGITK                         | 2 | 0.994 |             |            |
|        |             |          |                                                           |       |  | DFHVDEQTTVK                      | 1 | 1.000 |             |            |
|        |             |          |                                                           |       |  | DFHVDEQTTVK                      | 2 | 1.000 |             |            |
|        |             |          |                                                           |       |  | DFHVDEQTTVK                      | 3 | 0.996 |             |            |
|        |             |          |                                                           |       |  | GKWEKPFEMK                       | 2 | 1.000 |             |            |
|        |             |          |                                                           |       |  | HTTERDFHVDEQTTVK                 | 2 | 1.000 |             |            |
|        |             |          |                                                           |       |  | INDYVEK                          | 2 | 0.993 |             |            |
|        |             |          |                                                           |       |  | IVELVK                           | 2 | 0.915 |             |            |
|        |             |          |                                                           |       |  | KINDYVEK                         | 2 | 0.999 |             |            |
|        |             |          |                                                           |       |  | KYASSANLHLPK                     | 2 | 1.000 |             |            |
|        |             |          |                                                           |       |  | KYASSANLHLPK                     | 3 | 1.000 |             |            |
|        |             |          |                                                           |       |  | LGMFDLHYCDK                      | 1 | 0.984 |             |            |
|        |             |          |                                                           |       |  | LGMFDLHYCDK                      | 3 | 1.000 |             |            |
|        |             |          |                                                           |       |  | LQLEDKLNELLAK                    | 2 | 1.000 |             |            |
|        |             |          |                                                           |       |  | LQLEDKLNELLAK                    | 3 | 1.000 |             |            |
|        |             |          |                                                           |       |  | LSISETYDLK                       | 2 | 1.000 |             |            |
|        |             |          |                                                           |       |  | LVDTFLEDVK                       | 1 | 0.987 |             |            |
|        |             |          |                                                           |       |  | LVDTFLEDVK                       | 2 | 1.000 |             |            |
|        |             |          |                                                           |       |  | SPLFVVK                          | 1 | 0.928 |             |            |
|        |             |          |                                                           |       |  | SPLFVVK                          | 2 | 0.985 |             |            |
|        |             |          |                                                           |       |  | SPLFVVKVNVPTQA                   | 2 | 0.989 |             |            |
|        |             |          |                                                           |       |  | SVLGDVGITVFSDR                   | 1 | 1.000 |             |            |
|        |             |          |                                                           |       |  | SVLGDVGITVFSDR                   | 2 | 1.000 |             |            |
|        |             |          |                                                           |       |  | SVLGDVGITVFSDR                   | 3 | 0.997 |             |            |
|        |             |          |                                                           |       |  | SVLGDVGITVFSDRADLSGITK           | 3 | 1.000 |             |            |
|        |             |          |                                                           |       |  | VVNPTQA                          | 1 | 0.988 |             |            |
|        |             |          |                                                           |       |  | VVNPTQA                          | 2 | 0.981 |             |            |
|        |             |          |                                                           |       |  | WEKPFEMK                         | 2 | 1.000 |             |            |
|        |             |          |                                                           |       |  | WEKPFEMK                         | 3 | 0.970 |             |            |
|        |             |          |                                                           |       |  | YASSANLHLPK                      | 3 | 1.000 |             |            |
| P35605 | COPB2_BOVIN | COPB2    | Coatomer subunit beta                                     | 0.999 |  | 3.3                              |   |       | 1,734,602   | 113,746    |
|        |             |          |                                                           |       |  | LNYYVGGVEIVTIAHLDRMTHYLLGYIPKDNR | 3 | 0.999 |             |            |
| P35833 | CSF3_BOVIN  | CSF3     | Granulocyte colony-stimulating facto                      | 0.999 |  | 14.4                             |   |       | 1,190,291   | 119,412    |
|        |             |          |                                                           |       |  | IQADGAELQERLCAAAHKLCHPEELMLLR    | 3 | 0.999 |             |            |

| Accession | Gene Name    | Species   | Protein Name                                                          | Score | Fragment | Count | Score | Count      | Count      |
|-----------|--------------|-----------|-----------------------------------------------------------------------|-------|----------|-------|-------|------------|------------|
| P41361    | ANT3_BOVIN   | SERPINC1  | Antithrombin-II                                                       | 1.000 | 22.2     |       |       | 12,875,607 | 1,076,321  |
|           |              |           |                                                                       |       |          | 3     | 0.967 |            |            |
|           |              |           |                                                                       |       |          | 2     | 0.999 |            |            |
|           |              |           |                                                                       |       |          | 2     | 1.000 |            |            |
|           |              |           |                                                                       |       |          | 2     | 0.993 |            |            |
|           |              |           |                                                                       |       |          | 3     | 0.997 |            |            |
|           |              |           |                                                                       |       |          | 3     | 0.982 |            |            |
|           |              |           |                                                                       |       |          | 2     | 1.000 |            |            |
|           |              |           |                                                                       |       |          | 3     | 0.998 |            |            |
|           |              |           |                                                                       |       |          | 2     | 1.000 |            |            |
|           |              |           |                                                                       |       |          | 1     | 0.922 |            |            |
|           |              |           |                                                                       |       |          | 2     | 1.000 |            |            |
| P41987    | CXA3_BOVIN   | GJA3      | Gap junction alpha-3 protein                                          | 0.999 | 4.9      | 3     | 0.999 | 4,867,121  | 374,823    |
| P42916    | CL43_BOVIN   | CL43      | Collectin-43                                                          | 0.999 |          | 3     | 0.999 | 2,566,143  | 263,840    |
| P43033    | LIS1_BOVIN   | PAFAH1B1  | Platelet-activating factor acetylhydrolase 1B subunit alpha           | 0.999 | 4.9      | 2     | 0.969 | 3,193,521  | 509,913    |
| P43481    | KIT_BOVIN    | KIT       | Mast/stem cell growth factor receptor Ki                              | 0.999 | 1.7      | 3     | 0.999 | 1,715,496  | 149,548    |
| P55106    | GDF6_BOVIN   | GDF6      | Growth/differentiation factor 6 (Fragment)                            | 0.999 | 4.6      | 3     | 0.999 | 4,858,500  | 568,629    |
| Q292Q4    | Q292Q4_BOVIN | MOG       | MOG alpha-2                                                           | 0.999 | 15.5     | 3     | 0.999 | 2,443,292  | 295,547    |
| P55803    | MOG_BOVIN    | MOG       | Myelin-oligodendrocyte glycoprotein                                   | 0.999 | 13.0     | 3     | 0.999 | 2,443,292  | 295,547    |
| P56652    | ITIH3_BOVIN  | ITIH3     | Inter-alpha-trypsin inhibitor heavy chain H                           | 1.000 | 11.6     | 3     | 0.999 | 14,117,659 | 2,107,451  |
|           |              |           |                                                                       |       |          | 2     | 0.999 |            |            |
|           |              |           |                                                                       |       |          | 2     | 1.000 |            |            |
|           |              |           |                                                                       |       |          | 2     | 0.997 |            |            |
|           |              |           |                                                                       |       |          | 2     | 0.999 |            |            |
|           |              |           |                                                                       |       |          | 2     | 1.000 |            |            |
|           |              |           |                                                                       |       |          | 3     | 0.997 |            |            |
|           |              |           |                                                                       |       |          | 2     | 0.987 |            |            |
|           |              |           |                                                                       |       |          | 2     | 1.000 |            |            |
| P56722    | PTPRN_BOVIN  | PTPRN     | Receptor-type tyrosine-protein phosphatase-like 1                     | 1.000 | 5.0      | 3     | 0.999 | 33,066,279 | 952,900    |
|           |              |           |                                                                       |       |          | 3     | 0.999 |            |            |
| P62285    | ASPM_BOVIN   | ASPM      | Abnormal spindle-like microcephaly-associated protein homolog (Frag   | 0.999 | 1.1      | 3     | 0.999 | 3,088,144  | 300,840    |
|           |              |           |                                                                       |       |          | 3     | 0.999 |            |            |
| P63026    | VAMP2_BOVIN  | VAMP2     | Vesicle-associated membrane protein 2                                 | 0.999 | 25.9     | 3     | 0.999 | 354,097    | 60,686     |
| P67774    | PPP2CA_BOVIN | PPP2CA    | Serine/threonine-protein phosphatase 2A catalytic subunit alpha isofo | 0.999 | 9.4      | 3     | 0.999 | 385,017    | 63,560     |
| Q0P594    | PPP2AB_BOVIN | PPP2CB    | Serine/threonine-protein phosphatase 2A catalytic subunit beta isofo  | 0.999 | 9.4      | 3     | 0.999 | 385,017    | 63,560     |
| P68210    | ENSA_BOVIN   | ENSA      | Alpha-endosulfine                                                     | 0.999 | 20.7     | 3     | 0.999 | 520,142    | 62,469     |
| P68210-2  | ENSA_BOVIN   | ENSA      | Isoform 2 of Alpha-endosulfine                                        | 0.999 | 21.4     | 3     | 0.999 | 520,142    | 62,469     |
| P79134    | ANXA6_BOVIN  | ANXA6     | Annexin A6                                                            | 0.999 | 4.9      | 3     | 0.999 | 6,474,594  | 1,539,535  |
| P79266    | GASR_BOVIN   | CCKBR     | Gastrin/cholecystokinin type B recepto                                | 0.999 | 4.0      | 3     | 0.999 | 48,366,771 | 12,983,217 |
| P81187    | CFAB_BOVIN   | CFB       | Complement factor B                                                   | 1.000 | 19.2     | 3     | 0.999 | 20,342,033 | 1,013,678  |
|           |              |           |                                                                       |       |          | 2     | 1.000 |            |            |
|           |              |           |                                                                       |       |          | 2     | 0.946 |            |            |
|           |              |           |                                                                       |       |          | 2     | 0.959 |            |            |
|           |              |           |                                                                       |       |          | 2     | 1.000 |            |            |
|           |              |           |                                                                       |       |          | 3     | 1.000 |            |            |
|           |              |           |                                                                       |       |          | 2     | 0.998 |            |            |
|           |              |           |                                                                       |       |          | 3     | 1.000 |            |            |
|           |              |           |                                                                       |       |          | 2     | 0.999 |            |            |
|           |              |           |                                                                       |       |          | 2     | 0.935 |            |            |
|           |              |           |                                                                       |       |          | 2     | 1.000 |            |            |
|           |              |           |                                                                       |       |          | 2     | 0.991 |            |            |
| P81644    | APOA2_BOVIN  | APOA2     | Apolipoprotein A-I                                                    | 1.000 | 58.0     | 3     | 0.999 | 32,289,238 | 7,882,180  |
|           |              |           |                                                                       |       |          | 2     | 1.000 |            |            |
|           |              |           |                                                                       |       |          | 3     | 1.000 |            |            |
|           |              |           |                                                                       |       |          | 2     | 0.992 |            |            |
|           |              |           |                                                                       |       |          | 2     | 1.000 |            |            |
|           |              |           |                                                                       |       |          | 3     | 1.000 |            |            |
|           |              |           |                                                                       |       |          | 3     | 0.884 |            |            |
|           |              |           |                                                                       |       |          | 2     | 1.000 |            |            |
|           |              |           |                                                                       |       |          | 2     | 0.995 |            |            |
|           |              |           |                                                                       |       |          | 3     | 1.000 |            |            |
| P82670    | RT10_BOVIN   | MRPS10    | 28S ribosomal protein S10, mitochondria                               | 0.999 | 13.9     | 3     | 0.999 | 2,969,442  | 843,409    |
| P82708    | RET5_BOVIN   | RBP5      | Retinol-binding protein 5                                             | 0.999 | 20.0     | 3     | 0.999 | 5,821,696  | 1,737,805  |
| P82917    | RT18C_BOVIN  | MRPS18C   | 28S ribosomal protein S18c, mitochondria                              | 0.999 | 13.3     | 3     | 0.999 | 4,201,308  | 652,678    |
| Q05443    | LUM_BOVIN    | LUM       | Lumican                                                               | 1.000 | 9.7      | 3     | 0.999 | 6,333,090  | 436,092    |
|           |              |           |                                                                       |       |          | 2     | 0.992 |            |            |
|           |              |           |                                                                       |       |          | 2     | 0.980 |            |            |
|           |              |           |                                                                       |       |          | 2     | 0.999 |            |            |
| Q05B84    | FSD1_BOVIN   | FSD1      | Fibronectin type III and SPRY domain-containing protein               | 0.999 | 5.2      | 3     | 0.999 | 2,072,382  | 231,503    |
| Q08D91    | K2C75_BOVIN  | KRT75     | Keratin, type II cytoskeletal 75                                      | 1.000 | 3.5      | 2     | 0.989 | 2,867,093  | 561,214    |
|           |              |           |                                                                       |       |          | 3     | 0.999 |            |            |
| Q08DF6    | Q08DF6_BOVIN | MTF1      | Metal-regulatory transcription factor 1                               | 0.999 | 2.8      | 3     | 0.999 | 1,873,542  | 248,189    |
| Q08DJ4    | Q08DJ4_BOVIN | ZC4H2     | Hepatocellular carcinoma-associated antigen 12                        | 0.999 | 5.8      | 3     | 0.999 | 4,438,174  | 1,387,998  |
| Q08DL9    | Q08DL9_BOVIN | STAM      | Signal transducing adaptor molecule (SH3 domain and ITAM motif)       | 0.999 | 5.1      | 3     | 0.999 | 2,487,647  | 429,209    |
| Q08DP3    | RELL1_BOVIN  | RELL1     | RELT-like protein 1                                                   | 0.999 | 7.8      | 3     | 0.999 | 9,728,904  | 3,017,155  |
| Q08DP7    | Q08DP7_BOVIN | PPP2R5B   | Protein phosphatase 2, regulatory subunit B', beta isoform            | 0.999 | 2.6      | 3     | 0.999 | 2,318,675  | 512,275    |
| Q08DQ4    | Q08DQ4_BOVIN | SERPINB9  | Serpin peptidase inhibitor, clade B (Ovalbumin), member 9             | 0.999 | 7.0      | 3     | 0.999 | 1,555,650  | 208,314    |
| Q08DT5    | Q08DT5_BOVIN | LOC768081 | Putative uncharacterized protein LOC768081                            | 0.999 | 15.7     | 3     | 0.999 | 2,423,325  | 390,420    |
| Q08DV5    | RN220_BOVIN  | RNF220    | E3 ubiquitin-protein ligase RNF220                                    | 0.999 | 3.0      | 3     | 0.999 | 3,779,300  | 284,942    |
| Q08DW8    | Q08DW8_BOVIN | MGC140823 | Mammary tumor virus receptor 2 homolog                                | 0.999 | 5.7      | 3     | 0.999 | 3,553,313  | 298,392    |
| Q08DX6    | BMP3B_BOVIN  | GDF10     | Bone morphogenetic protein 3E                                         | 0.999 | 6.9      | 3     | 0.999 | 1,682,813  | 348,360    |
| Q08DX7    | SPNS1_BOVIN  | SPNS1     | Protein spinster homolog 1                                            | 0.999 | 4.9      | 3     | 0.999 | 1,259,563  | 212,594    |
| Q08DZ1    | Q08DZ1_BOVIN | NSG1      | Neuron specific gene family member 1                                  | 0.999 | 10.9     | 3     | 0.999 | 3,500,408  | 308,466    |
| Q08DZ2    | PRP4B_BOVIN  | PRPF4B    | Serine/threonine-protein kinase PRP4 homolog                          | 0.999 | 1.6      | 3     | 0.999 | 10,146,437 | 637,748    |
| Q08E08    | SCN4B_BOVIN  | SCN4B     | Sodium channel subunit beta-4                                         | 0.999 | 10.5     | 3     | 0.999 | 3,251,675  | 355,280    |
| Q08E20    | ESTD_BOVIN   | ESD       | S-formylglutathione hydrolase                                         | 0.999 | 8.5      | 3     | 0.999 | 52,799,458 | 6,387,740  |
| Q08E42    | Q08E42_BOVIN | LLRC8A    | Leucine rich repeat containing 8 family, member 1                     | 0.999 | 2.5      | 3     | 0.999 | 1,867,167  | 277,284    |
| Q08E52    | PAK1_BOVIN   | PAK1      | Serine/threonine-protein kinase PAK 1                                 | 1.000 | 3.9      | 3     | 0.999 | 4,140,638  | 754,789    |
|           |              |           |                                                                       |       |          | 3     | 0.999 |            |            |

|          |              |             |                                                                                 |       |      |                                 |   |           |            |           |
|----------|--------------|-------------|---------------------------------------------------------------------------------|-------|------|---------------------------------|---|-----------|------------|-----------|
| Q08E55   | Q08E55_BOVIN | MBTPS1      | MBTPS1 protein                                                                  | 0.999 | 1.7  |                                 |   | 2,107,279 | 266,090    |           |
| Q08E59   | Q08E59_BOVIN | C13H20ORF12 | Chromosome 20 open reading frame 12 ortholog                                    | 0.999 | 2.3  | LPGVMFEGQGHKLDLLR               | 3 | 0.999     | 1,598,531  | 261,826   |
| Q0I40    | Q0I40_BOVIN  | LOC538872   | Similar to Dual specificity protein phosphatase 18 (Low molecular weight)       | 0.999 | 10.7 | GYWRKQVDHISAHLR                 | 3 | 0.999     | 2,811,942  | 323,397   |
| Q0I91    | DJC21_BOVIN  | DNAJC21     | DnaJ homolog subfamily C member 21                                              | 0.999 | 3.9  | LYDFDFDIADHIHSVEMKQGR           | 3 | 0.999     | 4,591,204  | 365,724   |
| Q0IIC7   | Q0IIC7_BOVIN | TTL2        | Tubulin tyrosine ligase-like family, member 2                                   | 0.999 | 3.0  | ATGHARAPSSSTLSNVSNTSR           | 3 | 0.999     | 56,324,500 | 9,861,960 |
| Q0III9   | ACTN3_BOVIN  | ACTN3       | Alpha-actinin-3                                                                 | 1.000 | 3.6  | GRDLPHSEFSQPSRR                 | 3 | 0.999     | 6,742,067  | 1,150,585 |
| Q0P5C9   | Q0P5C9_BOVIN | SLC39A7     | Solute carrier family 39 (Zinc transporter), member 7                           | 0.999 | 6.0  | LVSDIANAWRGLGAEK                | 3 | 0.999     | 791,042    | 124,876   |
| Q0P5E1   | Q0P5E1_BOVIN | TRIP1       | TP53 regulated inhibitor of apoptosis 1                                         | 0.999 | 21.1 | LVSIGAEIVDGNLK                  | 3 | 0.999     | 2,485,271  | 332,111   |
| Q0P5E7   | GTPB8_BOVIN  | GTPB8       | GTP-binding protein $\beta$                                                     | 0.999 | 7.3  | EASPLQSLLEVLGLLGGVMMVLAHLE      | 3 | 0.999     | 2,214,250  | 215,547   |
| Q0P5H8   | HERP2_BOVIN  | HERPUD2     | Homocysteine-responsive endoplasmic reticulum-resident ubiquitin-like protein 2 | 0.999 | 5.4  | EKEIPIEGLEFMGHGK                | 3 | 0.999     | 2,794,321  | 429,058   |
| Q0P5J4   | K1C25_BOVIN  | KRT25       | Keratin, type I cytoskeletal 25                                                 | 0.999 | 2.0  | AFSAFQAFTEVLRLPKQLTK            | 3 | 0.999     | 856,380    | 65,423    |
| Q0P5J6   | K1C27_BOVIN  | KRT27       | Keratin, type I cytoskeletal 27                                                 | 0.999 | 2.0  | FIMVMGAMLLVYLHQAGWFFPR          | 3 | 0.999     | 856,380    | 65,423    |
| Q148H6   | K1C28_BOVIN  | KRT28       | Keratin, type I cytoskeletal 28                                                 | 0.999 | 1.9  |                                 |   |           | 856,380    | 65,423    |
| Q0P5J8   | FA40A_BOVIN  | FAM40A      | Protein FAM40A                                                                  | 1.000 | 3.6  | VTMONLNDLR                      | 2 | 0.979     | 10,009,456 | 979,305   |
| Q0P5M9   | MFS10_BOVIN  | MFSD10      | Major facilitator superfamily domain-containing protein 1                       | 0.999 | 3.7  | EVFSKPISWEELQ                   | 3 | 0.809     | 1,785,196  | 371,032   |
| Q0VBZ8   | PRR14_BOVIN  | PRR14       | Proline-rich protein 14                                                         | 0.999 | 3.8  | TAGLLPGGKAREFNR                 | 3 | 0.999     | 4,471,463  | 411,889   |
| Q0VC20   | RXRG_BOVIN   | RXRG        | Retinoic acid receptor RXR-gamma                                                | 1.000 | 4.5  | VDQVHQPTLVVMQDIASSRPR           | 3 | 0.999     | 1,713,924  | 292,306   |
| Q0VC50   | RT4I1_BOVIN  | RTN4IP1     | Reticulon-4-interacting protein 1, mitochondrial                                | 0.999 | 6.6  | ERAESAECANSGHEDMPVER            | 3 | 0.999     | 4,701,933  | 378,644   |
| Q0VC54   | ZNT6_BOVIN   | SLC30A6     | Zinc transporter 6                                                              | 0.999 | 6.3  | VHAASINPIDVNMRSYGGATALNMKR      | 3 | 0.999     | 5,522,146  | 583,430   |
| Q0VCB4   | Q0VCB4_BOVIN | RAB9B       | RAB9B, member RAS oncogene family                                               | 0.999 | 13.9 | GTDDSNPVSTPTKPSPPPEFSFNTPGK     | 3 | 0.999     | 6,738,929  | 353,056   |
| Q0VCD2   | TBG1_BOVIN   | TUBG1       | Tubulin gamma-1 chain                                                           | 0.999 | 10.9 | EDRQVITTEEAQSWCMENGDYPPYLETSK   | 3 | 0.999     | 2,811,280  | 624,002   |
| Q0VCD2   | TBG2_BOVIN   | TUBG2       | Tubulin gamma-2 chain                                                           | 0.999 | 10.9 | LHFLMTGYPLTIDQSVASVRKTVLDMVR    | 3 | 0.999     | 2,811,280  | 624,002   |
| Q0VCF9   | LSM12_BOVIN  | LSM12       | Protein LSM12 homolog                                                           | 0.999 | 12.3 | RLTQNADCVVLDNTALNR              | 3 | 0.999     | 3,434,321  | 329,454   |
| Q0VCL5   | Q0VCL5_BOVIN | HMG20A      | High-mobility group 20a                                                         | 0.999 | 6.1  | LSQAYAISAGVSLGQQLFQTIHK         | 3 | 0.999     | 531,795    | 71,995    |
| Q0VCN6   | CSTN3_BOVIN  | CLSTN3      | Calsynenin-3                                                                    | 0.999 | 2.6  | METLMTSSTLPFLFADEDGSK           | 3 | 0.999     | 2,026,227  | 237,222   |
| Q0VCN6-2 | CSTN3_BOVIN  | CLSTN3      | isoform 2 of Calsynenin-3                                                       | 0.999 | 2.9  |                                 |   |           | 2,026,227  | 237,222   |
| Q0VCQ6   | Q0VCQ6_BOVIN | PDCD10      | Programmed cell death 10                                                        | 0.999 | 11.3 | LHSGVVFPEAVILDKATGEGLIRAK       | 3 | 0.999     | 3,234,121  | 529,269   |
| Q0VCS8   | Q0VCS8_BOVIN | GSTT3       | Glutathione S-transferase, theta 3                                              | 0.999 | 8.8  | MAADDVEEYMIERPEPEFDLNEK         | 3 | 0.999     | 5,762,854  | 1,893,876 |
| Q0VCU5   | Q0VCU5_BOVIN | RAD51AP1    | RAD51 associated protein 1                                                      | 0.999 | 8.0  | GQNHSDDFVQVPLRKRVPALK           | 3 | 0.999     | 4,693,704  | 479,143   |
| Q0VCV1   | Q0VCV1_BOVIN | ARMCX6      | Armadillo repeat containing, X-linked 6                                         | 0.999 | 7.3  | KETGATSKSPHVSNCVAGDYLDDK        | 3 | 0.999     | 1,560,971  | 267,252   |
| Q0VCY4   | Q0VCY4_BOVIN | RGL2        | Rai guanine nucleotide dissociation stimulator-like                             | 0.999 | 4.0  | PALSGELLRAQVLPFLPLFIR           | 3 | 0.999     | 3,260,350  | 331,327   |
| Q0VCZ2   | Q0VCZ2_BOVIN | TRIM52      | Tripartite motif-containing 52                                                  | 0.999 | 3.8  | AFTSTPALLGLMVDRLALESHPADELERTK  | 3 | 0.999     | 1,036,677  | 506,837   |
| Q0VCZ8   | Q0VCZ8_BOVIN | ACSL1       | Acyl-CoA synthetase long-chain family member 1                                  | 0.999 | 2.9  | PCIPSAITLR                      | 3 | 0.999     | 3,945,679  | 421,412   |
| Q0VD04   | Q0VD04_BOVIN | KRT85       | Keratin 85                                                                      | 0.940 | 3.4  | VRLMITGAAPVSVATVTLFLR           | 3 | 0.999     | 892,619    | 91,069    |
| Q0VD36   | Q0VD36_BOVIN | KDEL1       | KDEL (Lys-Asp-Glu-Leu) containing 1                                             | 0.905 | 2.6  | LASELNHVQEVLEGYKK               | 3 | 0.827     | 589,531    | 73,905    |
| Q10568   | CPSF2_BOVIN  | CPSF2       | Cleavage and polyadenylation specificity factor subunit 2                       | 0.999 | 3.7  | VYIKTHGEHVGR                    | 3 | 0.870     | 1,194,754  | 220,630   |
| Q148H7   | K2C79_BOVIN  | KRT79       | Keratin, type II cytoskeletal 79                                                | 0.996 | 2.2  | QRDEQLLNVLETLRGDGNVLIADTAGR     | 3 | 0.999     | 564,108    | 56,157    |
| Q148H8   | K2C72_BOVIN  | KRT72       | Keratin, type II cytoskeletal 72                                                | 0.999 | 2.2  | NLDLSIIAEVK                     | 2 | 0.999     | 3,365,687  | 248,983   |
| Q17QC2   | Q17QC2_BOVIN | RDH13       | Retinol dehydrogenase 13 (All-trans/9-cis)                                      | 0.999 | 6.3  | GGFVGTVFGSAGLGPACPSVCPGPIQVTVNK | 3 | 0.999     | 1,879,150  | 166,660   |
| Q17QH9   | IQCD_BOVIN   | IQCD        | IQ domain-containing protein 9                                                  | 1.000 | 4.8  | HLDLASLKSIREFAAK                | 3 | 0.999     | 3,562,438  | 474,370   |
| Q3SZ48   | TM55A_BOVIN  | TMEM55A     | Transmembrane protein 55A                                                       | 0.999 | 4.7  | EHEDLCQALLDRVSLQEEER            | 3 | 0.999     | 509,927    | 81,456    |
| Q17QI9   | Q17QI9_BOVIN | TMEM55B     | Transmembrane protein 55B                                                       | 0.999 | 4.7  |                                 |   |           | 509,927    | 81,456    |
| Q17QL7   | Q17QL7_BOVIN | KRT15       | KRT15 protein                                                                   | 1.000 | 7.1  | YVRCPCNCLICK                    | 3 | 0.999     | 3,329,702  | 148,801   |
| Q17QN5   | Q17QN5_BOVIN | ARMCX1      | Armadillo repeat containing, X-linked 1                                         | 0.999 | 5.5  | ALEEANADLEVK                    | 2 | 0.999     | 1,997,312  | 649,428   |
| Q17QN6   | EM55_BOVIN   | MPP1        | 55 kDa erythrocyte membrane protein                                             | 0.999 | 4.5  | QSVYADINGLR                     | 2 | 0.981     | 1,600,792  | 208,921   |
| Q17QR2   | Q17QR2_BOVIN | STAMBIP     | STAM binding protein                                                            | 0.999 | 3.6  | VLDLTLTK                        | 2 | 1.000     | 2,523,574  | 721,673   |
| Q17QR8   | HARB1_BOVIN  | HARB1       | Putative nuclease HARB1                                                         | 0.999 | 6.6  | VEGSSQESAGLIPSPLEQWR            | 3 | 0.999     | 3,306,746  | 369,259   |
| Q17QU4   | RB39B_BOVIN  | RAB39B      | Ras-related protein Rab-39E                                                     | 0.999 | 4.7  | AISPETQILALGFYTSQSFQTR          | 3 | 0.999     | 2,089,366  | 404,763   |
| Q17QU7   | DHR13_BOVIN  | DHRS13      | Dehydrogenase/reductase SDR family member 13                                    | 0.999 | 9.8  | FRSITRAYYR                      | 3 | 0.999     | 8,376,350  | 1,213,145 |
| Q17QV1   | Q17QV1_BOVIN | APBB1       | Amyloid beta (A4) protein-binding, family B, member 1 (Fe65)                    | 0.999 | 2.0  | APPCRGLASLRG                    | 3 | 0.999     | 4,095,062  | 312,682   |
| Q17QV7   | Q17QV7_BOVIN | SULT4A1     | Sulfotransferase family 4A, member 1                                            | 0.999 | 6.0  | MEALLGVGLLLGAYLVYYNLVKAPPCR     | 3 | 0.999     | 1,529,029  | 174,837   |
| Q17QW1   | BORG5_BOVIN  | CDC42EP1    | Cdc42 effector protein 1                                                        | 1.000 | 10.5 | EQONLRRRAATAHR                  | 3 | 0.999     | 4,008,475  | 602,969   |
| Q17QZ4   | TFDP1_BOVIN  | TFDP1       | Transcription factor Dp-1                                                       | 0.999 | 4.9  | GRVGLWKDIFTVSMNEK               | 3 | 0.999     | 164,488    | 13,867    |
| Q1JPC8   | Q1JPC8_BOVIN | C20orf18    | RanBP-type and C3HC4-type zinc finger containing                                | 1.000 | 4.1  | SPASSTDGHSAYGLDSGFCTISR         | 3 | 0.999     | 1,086,027  | 152,989   |
| Q1JPE3   | Q1JPE3_BOVIN | CARKL       | Carbohydrate kinase-like                                                        | 0.999 | 4.6  | QSQLOEILLQIAFKNLVQR             | 3 | 0.999     | 309,503    | 51,100    |
| Q1JQA6   | Q1JQA6_BOVIN | NHEJ1       | Nonhomologous end-joining factor 1                                              | 0.999 | 7.0  | QQLRKCVCIGVSGQMVGVMFWK          | 3 | 0.999     | 1,575,238  | 224,118   |
| Q1JQC5   | RMD3_BOVIN   | FAM82A2     | Regulator of microtubule dynamics protein 2                                     | 1.000 | 16.1 | DRLKTPEEESFLQFMVEK              | 3 | 0.999     | 7,285,514  | 523,652   |
| Q1JQE0   | SNW1_BOVIN   | SNW1        | SNW domain-containing protein 1                                                 | 0.999 | 5.6  | AGLGLLLGTAAGLGLFCALYSORWK       | 3 | 0.999     | 6,574,725  | 566,234   |
| Q1JQE1   | TM219_BOVIN  | TMEM219     | Transmembrane protein 219                                                       | 1.000 | 7.5  | DSERESDGDGEVSCETVKMGR           | 3 | 0.999     | 16,418,158 | 1,790,671 |
| Q1JQE5   | Q1JQE5_BOVIN | LOC526597   | Putative uncharacterized protein LOC526597                                      | 0.999 | 7.9  | LALELPNVTKEDSAFQKDLLELVLGE      | 3 | 0.999     | 531,050    | 121,798   |
| Q1LZ81   | Q1LZ81_BOVIN | PDCD6       | PDCD6 protein                                                                   | 0.999 | 16.9 | MSEECGVWSHEGLVLTG               | 3 | 0.999     | 2,482,179  | 911,182   |

| Accession | Gene         | Protein   | Description                                                            | Score | Peptide                           | Count | Score | Count       | Count      |
|-----------|--------------|-----------|------------------------------------------------------------------------|-------|-----------------------------------|-------|-------|-------------|------------|
|           |              |           |                                                                        |       | MAAYPRPGGAGPAAGALPDQSFLLWVFOR     | 3     | 0.999 |             |            |
| Q1LZ86    | ABHD6_BOVIN  | ABHD6     | Monoacylglycerol lipase ABHD6                                          | 0.999 | 6.2                               |       |       | 2,961,164   | 185,443    |
| Q1LZC0    | ZNF22_BOVIN  | ZNF22     | Zinc finger protein 22                                                 | 1.000 | FLPKNLHLVCVDMPGHEGTTTR            | 3     | 0.999 | 3,433,229   | 759,886    |
| Q1LZH3    | Q1LZH3_BOVIN | LOC526787 | LOC526787 protein (Fragment)                                           | 1.000 | 9.3                               |       |       | 1,786,486   | 256,474    |
| Q1RMJ5    | DRS7C_BOVIN  | DHRS7C    | Dehydrogenase/reductase SDR family member 7C                           | 0.999 | SHKCADCCKGKSFQSSNLQHR             | 3     | 0.999 | 5,305,183   | 896,703    |
| Q1RML6    | Q1RML6_BOVIN | TRNT1     | Uncharacterized protein                                                | 0.999 | FLASFLEPLYAVMVSSGASVTLKQRPSEA     | 3     | 0.999 | 4,625,842   | 230,564    |
| Q1RMR5    | Q1RMR5_BOVIN | LRR6      | Leucine rich repeat containing 1                                       | 0.999 | 4.2                               |       |       | 21,083,427  | 590,642    |
| Q1RMS4    | LRFN3_BOVIN  | LRFN3     | Leucine-rich repeat and fibronectin type-III domain-containing protein | 0.999 | LGIPFR TAYAASK                    | 3     | 0.999 | 1,438,940   | 220,693    |
| Q1RMT7    | RIOK3_BOVIN  | RIOK3     | Serine/threonine-protein kinase RIO3                                   | 0.999 | 4.4                               |       |       | 3,326,800   | 329,531    |
| Q1RMU0    | Q1RMU0_BOVIN | NAB2      | NGFI-A binding protein 2 (EGR1 binding protein 2)                      | 0.999 | QMQQWSIPFPVSGHDIRK                | 3     | 0.999 | 2,518,496   | 210,992    |
| Q1RMU2    | CYLD_BOVIN   | CYLD      | Ubiquitin carboxyl-terminal hydrolase CYLD                             | 0.999 | EQTSKSQOMERLEVDPSK                | 3     | 0.999 | 1,773,574   | 292,480    |
| Q1RMU4    | ERLN2_BOVIN  | ERLN2     | Erlin-2                                                                | 0.999 | 4.6                               |       |       | 680,850     | 145,244    |
| Q1RMU5    | RBM5_BOVIN   | RBM5      | RNA-binding protein 5                                                  | 0.999 | RRCRCQQLSLPLSVLCPGAGLLFVPPSLDR    | 3     | 0.999 | 5,711,067   | 623,765    |
| Q1RMU9    | Q1RMU9_BOVIN | FIG4      | FIG4 homolog (S. cerevisiae)                                           | 0.999 | ESVVFHAYGGSMEDGKEDSKIPTCAIK       | 3     | 0.999 | 3,531,871   | 336,562    |
| Q1RMV0    | PEX5_BOVIN   | PEX5      | Peroxisomal targeting signal 1 receptor                                | 0.999 | 2.1                               |       |       | 16,479,208  | 12,346,104 |
| Q24JZ9    | Q24JZ9_BOVIN | PIAS1     | Protein inhibitor of activated STAT, 1                                 | 0.999 | FAEAPSCLIQMFRFGKDFK               | 3     | 0.999 | 3,327,702   | 926,167    |
| Q24K04    | Q24K04_BOVIN | RANBP3    | RAN binding protein 3                                                  | 0.999 | 1.9                               |       |       | 1,529,609   | 234,368    |
| Q27991    | MYH10_BOVIN  | MYH10     | Myosin-10                                                              | 0.999 | LVMRTQGLSR                        | 3     | 0.999 | 7,530,650   | 621,156    |
| Q28072    | CD3D_BOVIN   | CD3D      | T-cell surface glycoprotein CD3 delta chain                            | 0.999 | ESLTKMLALRNTNPNFVR                | 3     | 0.999 | 2,181,649   | 527,174    |
| Q28085    | CFAH_BOVIN   | CFH       | Complement factor H                                                    | 1.000 | IRNKQEVMSIDLEER                   | 3     | 0.999 | 65,220,585  | 1,644,309  |
| Q28851    | ATPK_BOVIN   | ATP5J2    | ATP synthase subunit f, mitochondria                                   | 0.999 | 2.5                               |       |       | 2,956,933   | 567,541    |
| Q29432    | PAG1_BOVIN   | PAG1      | Pregnancy-associated glycoprotein 1                                    | 0.999 | FSRAADTQALMGNDQYQPLR              | 3     | 0.999 | 1,678,950   | 422,829    |
| Q29443    | TRFE_BOVIN   | TF        | Serotransferrin                                                        | 1.000 | 3.2                               |       |       | 144,332,960 | 6,409,389  |
|           |              |           |                                                                        |       | NGEWSQLPK                         | 2     | 0.974 |             |            |
|           |              |           |                                                                        |       | SCDRPVFEK                         | 2     | 0.967 |             |            |
|           |              |           |                                                                        |       | SQEQVAFK                          | 2     | 0.935 |             |            |
|           |              |           |                                                                        |       | TPVILNGQAVLPK                     | 2     | 0.998 |             |            |
|           |              |           |                                                                        |       | 23.9                              |       |       |             |            |
|           |              |           |                                                                        |       | DFTPSGIAGAFQRGYRYNKN              | 3     | 0.999 |             |            |
|           |              |           |                                                                        |       | 5.8                               |       |       |             |            |
|           |              |           |                                                                        |       | ALVDTGTSVIGPRLVNNIHR              | 3     | 0.999 |             |            |
|           |              |           |                                                                        |       | 57.2                              |       |       |             |            |
|           |              |           |                                                                        |       | CACSNHEPFGYSGAFK                  | 2     | 1.000 |             |            |
|           |              |           |                                                                        |       | GCLVPVLAENYK                      | 1     | 0.991 |             |            |
|           |              |           |                                                                        |       | CGLVPVLAENYK                      | 2     | 1.000 |             |            |
|           |              |           |                                                                        |       | CLASIAK                           | 2     | 0.882 |             |            |
|           |              |           |                                                                        |       | CLMEGAGDVAFVK                     | 2     | 1.000 |             |            |
|           |              |           |                                                                        |       | DGTRKPVDAENCLAR                   | 3     | 1.000 |             |            |
|           |              |           |                                                                        |       | DKPDNLFQSPHGK                     | 2     | 1.000 |             |            |
|           |              |           |                                                                        |       | DLLFRDQTK                         | 2     | 0.890 |             |            |
|           |              |           |                                                                        |       | DNPTHTYAVAVVK                     | 2     | 1.000 |             |            |
|           |              |           |                                                                        |       | DQTVIONTDGNNNEAWAK                | 2     | 1.000 |             |            |
|           |              |           |                                                                        |       | DSADGFLK                          | 1     | 0.990 |             |            |
|           |              |           |                                                                        |       | DTDFKLNELR                        | 2     | 0.999 |             |            |
|           |              |           |                                                                        |       | EDVIWELLNHAQEHFGK                 | 2     | 1.000 |             |            |
|           |              |           |                                                                        |       | EDVIWELLNHAQEHFGK                 | 3     | 1.000 |             |            |
|           |              |           |                                                                        |       | ENFEVLCK                          | 1     | 0.978 |             |            |
|           |              |           |                                                                        |       | ESKPPDSSKDECMVK                   | 2     | 1.000 |             |            |
|           |              |           |                                                                        |       | FDEFFSAGCAPGSPR                   | 2     | 1.000 |             |            |
|           |              |           |                                                                        |       | GDVAFVK                           | 1     | 0.971 |             |            |
|           |              |           |                                                                        |       | GDVAFVK                           | 2     | 0.979 |             |            |
|           |              |           |                                                                        |       | GDVAFVKDQTVIONTDGNNNEAWAK         | 3     | 1.000 |             |            |
|           |              |           |                                                                        |       | HSTVFDNLPNPNEDR                   | 2     | 1.000 |             |            |
|           |              |           |                                                                        |       | HSTVFDNLPNPNEDR                   | 3     | 0.984 |             |            |
|           |              |           |                                                                        |       | HSTVFDNLPNPNEDRK                  | 2     | 1.000 |             |            |
|           |              |           |                                                                        |       | HSTVFDNLPNPNEDRK                  | 3     | 1.000 |             |            |
|           |              |           |                                                                        |       | ILESQPVFVSVK                      | 2     | 1.000 |             |            |
|           |              |           |                                                                        |       | INNCKFDEFFSAGCAPGSPR              | 3     | 0.986 |             |            |
|           |              |           |                                                                        |       | KENFEVLCK                         | 2     | 1.000 |             |            |
|           |              |           |                                                                        |       | KNYELLCGDNTR                      | 2     | 1.000 |             |            |
|           |              |           |                                                                        |       | KPVTDAENCLAR                      | 2     | 1.000 |             |            |
|           |              |           |                                                                        |       | KTYDSYLGDDYVR                     | 2     | 1.000 |             |            |
|           |              |           |                                                                        |       | LYKELPDPOESIQR                    | 2     | 0.997 |             |            |
|           |              |           |                                                                        |       | LYKELPDPOESIQR                    | 3     | 0.999 |             |            |
|           |              |           |                                                                        |       | MDFELYLYEYVTLAQNLR                | 2     | 1.000 |             |            |
|           |              |           |                                                                        |       | NYELLCGDNTR                       | 2     | 1.000 |             |            |
|           |              |           |                                                                        |       | NYELLCGDNTRK                      | 2     | 0.997 |             |            |
|           |              |           |                                                                        |       | QDDDFGK                           | 2     | 0.958 |             |            |
|           |              |           |                                                                        |       | SVDDYQECYLAMVPSHAVVAR             | 2     | 1.000 |             |            |
|           |              |           |                                                                        |       | SVDDYQECYLAMVPSHAVVAR             | 3     | 1.000 |             |            |
|           |              |           |                                                                        |       | TAGWNIPMGLLYSK                    | 2     | 1.000 |             |            |
|           |              |           |                                                                        |       | TSDANINWNLK                       | 1     | 0.979 |             |            |
|           |              |           |                                                                        |       | TSDANINWNLK                       | 2     | 1.000 |             |            |
|           |              |           |                                                                        |       | TSHMDCIK                          | 2     | 0.999 |             |            |
|           |              |           |                                                                        |       | TVGKEDVIWELLNHAQEHFGK             | 2     | 1.000 |             |            |
|           |              |           |                                                                        |       | TVGKEDVIWELLNHAQEHFGK             | 3     | 1.000 |             |            |
|           |              |           |                                                                        |       | TYDSYLGDDYVR                      | 2     | 0.998 |             |            |
|           |              |           |                                                                        |       | WCTISTHEANK                       | 2     | 1.000 |             |            |
|           |              |           |                                                                        |       | WSGFSGGAIETEAENTEECIAK            | 2     | 1.000 |             |            |
|           |              |           |                                                                        |       | YYGYTGAFR                         | 1     | 0.982 |             |            |
| Q29RL1-2  | CF165_BOVIN  |           | Isoform 2 of UPF0704 protein C6orf165 homolog                          | 0.999 | 1.7                               |       |       | 643,075     | 251,360    |
| Q29RL1    | CF165_BOVIN  |           | UPF0704 protein C6orf165 homolog                                       | 0.999 | 1.6                               |       |       | 643,075     | 251,360    |
| Q29RP7    | Q29RP7_BOVIN | NFIC      | Nuclear factor 1                                                       | 0.999 | VNLTRAVDET                        | 3     | 0.999 | 3,201,727   | 833,092    |
| Q29RS3    | Q29RS3_BOVIN | IQCB1     | IQ motif containing B1                                                 | 0.999 | 7.3                               |       |       | 1,206,227   | 185,056    |
| Q29RY7    | FGL2_BOVIN   | FGL2      | Fibroleukin                                                            | 0.999 | DLVSLACDPASQQGPPTLRPARPLQTVPLWD   | 3     | 0.999 | 1,141,881   | 129,096    |
| Q29S07    | BRF2_BOVIN   | BRF2      | Transcription factor IIIB 50 kDa subunit                               | 0.983 | 5.0                               |       |       | 1,784,853   | 275,600    |
| Q29S22    | DDX47_BOVIN  | DDX47     | Probable ATP-dependent RNA helicase DDX47                              | 0.999 | LLGLDVPVSLCLVDLVK                 | 2     | 0.983 | 7,629,525   | 1,951,543  |
| Q2ABB1    | Q2ABB1_BOVIN | Bt.76070  | Taste receptor type 2                                                  | 0.999 | 3.5                               |       |       | 1,290,055   | 188,303    |
| Q2EGB9    | ASCL2_BOVIN  | ASCL2     | Achaete-scute homolog 2                                                | 0.912 | EDVGDNDTTEGAIGVR                  | 3     | 0.999 | 2,415,954   | 257,199    |
| Q2HJ22    | CLD5_BOVIN   | CLDN5     | Claudin-5                                                              | 0.999 | 10.9                              |       |       | 1,834,228   | 212,407    |
| Q2HJ67    | HXA5_BOVIN   | HOXA5     | Homeobox protein Hox-A5                                                | 0.999 | SQSEVAQLCLTPSDPMDCSLPGSSSIHGIFQAR | 3     | 0.999 | 2,565,850   | 360,035    |
| Q2HJ68    | NGRN_BOVIN   | NGRN      | Neugrin                                                                | 0.999 | 11.4                              |       |       | 1,811,359   | 152,156    |
| Q2HJ69    | Q2HJ69_BOVIN | SRA1      | Steroid receptor RNA activator 1                                       | 0.999 | VKLVLNLFQALRQHVPHGGASK            | 3     | 0.838 | 772,146     | 174,862    |
| Q2HJ70    | VPS35_BOVIN  | VPS35     | Vacuolar protein sorting-associated protein 3                          | 0.999 | 15.1                              |       |       | 17,927,782  | 5,347,639  |
| Q2KHT8    | DIM1_BOVIN   | DIMT1     | Probable dimethyladenosine transferase                                 | 0.999 | ALTVGAVLLALVALVTLAGAQCCTCVAPGPAK  | 3     | 0.999 | 2,114,646   | 321,829    |



|          |              |                                  |                                                                           |       |                    |                                |       |           |            |           |
|----------|--------------|----------------------------------|---------------------------------------------------------------------------|-------|--------------------|--------------------------------|-------|-----------|------------|-----------|
|          |              |                                  |                                                                           |       |                    | VDHLMKVGNFR                    | 3     | 0.999     |            |           |
| Q2KHU4   | CLPP_BOVIN   | CLPP                             | Putative ATP-dependent Clp protease proteolytic subunit, mitochondri      | 0.999 | 5.5                | YMPSPMEAEFGILDK                | 3     | 0.999     | 2,175,996  | 282,369   |
| Q2KHW4   | Q2KHW4_BOVIN | SLC25A15                         | Solute carrier family 25 (Mitochondrial carrier; ornithine transporter) m | 0.999 | 3.0                | MQTFPDLR                       | 3     | 0.999     | 3,228,088  | 812,854   |
| Q2KI69   | KCIP4_BOVIN  | KCNIP4                           | Kv channel-interacting protein 4                                          | 0.999 | 6.8                | GFKNECPGSGVNEEDTFK             | 3     | 0.999     | 7,942,621  | 522,746   |
| Q2KIC2   | ETV1_BOVIN   | ETV1                             | ETS translocation variant 1                                               | 0.999 | 4.6                | YVYKFCVCDPEALFSAFDPNQNR        | 3     | 0.999     | 1,446,042  | 444,978   |
| Q2KIF2   | Q2KIF2_BOVIN | LRG1                             | Leucine-rich alpha-2-glycoprotein 1                                       | 1.000 | 14.5               | LDMLDLSNNLLTVPTGLWTSLKG        | 2     | 0.986     | 4,695,315  | 406,120   |
|          |              |                                  |                                                                           |       |                    | LQVLGEGLLAPQPK                 | 2     | 1.000     |            |           |
|          |              |                                  |                                                                           |       |                    | NSLTGLFFGFFR                   | 2     | 1.000     |            |           |
| Q2KIG0   | ETFD_BOVIN   | ETFDH                            | Electron transfer flavoprotein-ubiquinone oxidoreductase, mitochondri     | 0.999 | 1.8                | QLAAQHEKDIR                    | 3     | 0.999     | 3,367,492  | 442,650   |
| Q2KIG3   | CBPB2_BOVIN  | CPB2                             | Carboxypeptidase B2                                                       | 0.999 | 5.0                | HMDFYMPVNVVDGYDYTWKK           | 3     | 0.999     | 2,229,383  | 209,939   |
| Q2KIR0   | CD045_BOVIN  |                                  | Uncharacterized protein C4orf45 homolog                                   | 0.999 | 7.1                | YLWRPASNRSLPAK                 | 3     | 0.999     | 6,463,513  | 258,225   |
| Q2KIR9   | Q2KIR9_BOVIN | LRRC46                           | Leucine rich repeat containing 4f                                         | 0.999 | 8.3                | EGITTRNLEGLONLHSLYLGQNKIQR     | 3     | 0.999     | 1,137,807  | 202,180   |
| Q2KIS7   | TETN_BOVIN   | CLEC3B                           | Tetranectin                                                               | 0.981 | 6.9                | TQLDSLACEVALLK                 | 2     | 0.981     | 2,386,138  | 432,268   |
| Q2KIV7   | Q2KIV7_BOVIN | PPA2                             | Pyrophosphatase (Inorganic) 2                                             | 0.999 | 6.4                | LIAINVNDPEASKFHDIEDVK          | 3     | 0.999     | 625,887    | 62,269    |
| Q2KIY8   | Q2KIY8_BOVIN | MBD1                             | Methyl-CpG binding domain protein 1                                       | 1.000 | 3.7                | YLGPAIDLTFDFKQGVLCYSPSK        | 3     | 0.999     | 1,949,571  | 194,506   |
| Q2KJ16   | PHKG2_BOVIN  | PHKG2                            | Phosphorylase b kinase gamma catalytic chain, testis/liver isoform        | 0.999 | 3.9                | YDPKDVIGRGVSSVVR               | 3     | 0.999     | 2,413,746  | 393,848   |
| Q2KJ20   | Q2KJ20_BOVIN | CHRDL2                           | Chordin-like 2                                                            | 0.999 | 4.7                | VLSLLGLALLWFPLDSTAR            | 3     | 0.999     | 2,872,500  | 412,006   |
| Q2KJ24   | MTMR9_BOVIN  | MTMR9                            | Myotubularin-related protein 9                                            | 0.999 | 4.1                | PLQESFVRLVEACGDLEQSMR          | 3     | 0.999     | 3,567,508  | 474,330   |
| Q2KJ48   | Q2KJ48_BOVIN | CDR2                             | Cerebellar degeneration-related protein 2, 62kDa                          | 0.999 | 5.5                | SSSETVLSLAGSDIVRGHEETCIR       | 3     | 0.999     | 12,703,017 | 1,135,162 |
| Q2KJ55   | Q2KJ55_BOVIN | ARHGAP25                         | Rho GTPase activating protein 2f                                          | 0.999 | 3.1                | KCFLTSALQGANSCKTEIFK           | 3     | 0.999     | 4,450,079  | 574,849   |
| Q2KJ57   | Q2KJ57_BOVIN | ABCD1                            | ATP-binding cassette, sub-family D (ALD), member 1                        | 0.999 | 3.3                | YHTHLLQDFGEGGWKFEKLSAAR        | 3     | 0.999     | 3,643,413  | 226,482   |
| Q2KJ82   | Q2KJ82_BOVIN | ZNF3                             | Uncharacterized protein                                                   | 0.999 | 3.8                | VSQEPQALLESALPSSK              | 3     | 0.999     | 3,790,858  | 452,151   |
| Q2KJB6   | VA0D2_BOVIN  | ATP6V0D2                         | V-type proton ATPase subunit d 2                                          | 0.999 | 8.6                | MLESaelNFNADHGYLEGLVRGCKAGLLTR | 3     | 0.999     | 4,146,297  | 777,988   |
| Q2KJD9   | ELOV5_BOVIN  | ELOVL5                           | Elongation of very long chain fatty acids protein                         | 0.999 | 10.0               | REHQKDHQNGSVAAVNGHISFSSLENNVK  | 3     | 0.999     | 1,989,664  | 363,883   |
| Q2KJF1   | A1BG_BOVIN   | A1BG                             | Alpha-1B-glycoprotein                                                     | 1.000 | 22.9               | ALWTGALTPGR                    | 2     | 1.000     | 33,442,846 | 1,875,666 |
|          |              |                                  |                                                                           |       |                    | FPLGPTSTTR                     | 2     | 0.868     |            |           |
|          |              |                                  |                                                                           |       |                    | LEGEDQFLVEAEAPEATQATFPVHR      | 3     | 1.000     |            |           |
|          |              |                                  |                                                                           |       |                    | LRSELAAWSR                     | 3     | 0.995     |            |           |
|          |              |                                  |                                                                           |       |                    | SLLSELSDPVELR                  | 2     | 0.989     |            |           |
|          |              |                                  |                                                                           |       |                    | THAAGTPEPSATVTIEELDPPTLTVD     | 3     | 1.000     |            |           |
|          |              |                                  |                                                                           |       |                    | VLSPAGPEAQFELR                 | 2     | 1.000     |            |           |
| Q2LDA0   | Q2LDA0_BOVIN | TLR5                             | Toll-like receptor 5                                                      | 1.000 | 1.5                | NKIQSLYLHPSFR                  | 3     | 0.999     | 2,277,891  | 217,825   |
| Q2M2T7   | RT24_BOVIN   | MRPS24                           | 28S ribosomal protein S24, mitochondria                                   | 0.999 | 15.6               | MVALYCGGLRPLMLSWSRDLPCIWR      | 3     | 0.999     | 574,351    | 118,252   |
| Q2NKS5   | Q2NKS5_BOVIN | MGC137053                        | Putative uncharacterized protein MGC137053                                | 0.999 | 20.6               | PKLLQHYLHAGVSECLNWSR           | 3     | 0.999     | 2,552,808  | 182,464   |
|          |              |                                  |                                                                           |       |                    | POPPAVFLORCOEPPQOHFFSK         | 3     | 0.999     |            |           |
| Q2NL21   | DJC11_BOVIN  | DNAJC11                          | DnaJ homolog subfamily C member 11                                        | 0.999 | 4.5                | IIEAEESRMGLIVNAWYKGFVNDK       | 3     | 0.999     | 1,653,339  | 412,585   |
| Q2T9N4   | PMF1_BOVIN   | PMF1                             | Polyamine-modulated factor 1                                              | 0.999 | 13.2               | LFDTMVDTFLOKLVAAGSFQRFTDCK     | 3     | 0.999     | 2,659,079  | 313,017   |
| Q2T9V5   | TRM6_BOVIN   | TRM6                             | tRNA (adenine(58)-N(1))-methyltransferase non-catalytic subunit TRM       | 0.999 | 3.4                | EAGTDRNRNIIDGKSQK              | 3     | 0.999     | 2,343,773  | 369,661   |
| Q2TA03   | UB2J2_BOVIN  | UBE2J2                           | Ubiquitin-conjugating enzyme E2 J2                                        | 0.999 | 5.8                | RQLAAQSLVFNLDK                 | 3     | 0.999     | 2,207,947  | 382,510   |
| Q2TA17   | ZN668_BOVIN  | ZNF668                           | Zinc finger protein 668                                                   | 0.999 | 5.8                | MFSDPSSFR                      | 1     | 0.999     | 1,783,423  | 185,441   |
|          |              |                                  |                                                                           |       |                    | THPVPITPTPLEPLVALLGMPEEPA      | 3     | 0.999     |            |           |
| Q2TA43   | ACTT2_BOVIN  | ACTRT2                           | Actin-related protein T2                                                  | 0.999 | 7.7                | HLFEWELGVKANDQPLMTEPSLNPRETR   | 3     | 0.999     | 348,502    | 57,456    |
| Q2TBH5   | UBXN8_BOVIN  | UBXN8                            | UBX domain-containing protein 8                                           | 0.999 | 4.4                | TSLYSLSTSFPR                   | 3     | 0.999     | 1,632,976  | 192,740   |
| Q2TBM9   | SRAC1_BOVIN  | SERAC1                           | Protein SERAC1                                                            | 0.999 | 6.7                | IFRGPFADTFSTVDIEDHDCAVWLLLR    | 3     | 0.999     | 3,516,499  | 391,849   |
|          |              |                                  |                                                                           |       |                    | ILGNMALNEHLHSTIVR              | 3     | 0.999     |            |           |
| Q2TBR5   | F166B_BOVIN  | FAM166B                          | Protein FAM166B                                                           | 0.999 | 8.8                | ARFLFGSSFPVLSNQALQEFQEMK       | 3     | 0.999     | 2,554,329  | 349,551   |
| Q2TBT8   | RN151_BOVIN  | RNF151                           | RING finger protein 151                                                   | 0.999 | 8.8                | LEVKCRNAEAGCQVTCPLAHR          | 3     | 0.999     | 2,742,813  | 366,220   |
| Q2TBX1   | Q2TBX1_BOVIN | CIP29                            | Cytokine induced protein 29 kDa                                           | 0.999 | 10.5               | ERFGIVTSSAGTGTEDTEAKK          | 3     | 0.999     | 4,978,012  | 311,753   |
| Q2YDC9   | PDCD2_BOVIN  | PDCD2                            | Programmed cell death protein 2                                           | 0.999 | 4.4                | TKISLEPEOILRYGR                | 3     | 0.999     | 1,859,017  | 182,953   |
| Q2YDF6   | RT35_BOVIN   | MRPS35                           | 28S ribosomal protein S35, mitochondria                                   | 1.000 | 4.3                | YCKSTDVLTIKTDR                 | 3     | 0.999     | 2,360,679  | 230,743   |
| Q2YDG1   | YB028_BOVIN  |                                  | Transmembrane protein ENSP00000343375 homolog                             | 0.999 | 13.4               | PDSSYDYLEEMETCEDGGCGPPKVLSSK   | 3     | 0.999     | 1,737,920  | 165,580   |
| Q2YDG2   | CD022_BOVIN  |                                  | Uncharacterized protein C4orf22 homolog                                   | 0.999 | 4.3                | ALAVREEDNR                     | 3     | 0.999     | 3,260,708  | 623,475   |
| Q32KL4   | RMD1_BOVIN   | FAM82B                           | Regulator of microtubule dynamics protein 1                               | 0.999 | 9.2                | SLLSALSYLGFETYQVISQAVLVHAAK    | 3     | 0.999     | 3,770,085  | 955,305   |
| Q32KX8   | CP013_BOVIN  | UPF0585 protein C16orf13 homolog | 0.999                                                                     | 7.4   | MVDMPANNKCLIFRK    | 3                              | 0.999 | 6,540,609 | 436,155    |           |
| Q32L67   | GLRX2_BOVIN  | GLRX2                            | Glutaredoxin-2, mitochondria                                              | 0.999 | 9.6                | LLPLVHQCHLKNSTR                | 3     | 0.999     | 1,435,750  | 144,053   |
| Q32L93   | GMPR2_BOVIN  | GMPR2                            | GMP reductase 2                                                           | 0.999 | 3.7                | LFYGMSSMEMAMKK                 | 3     | 0.999     | 2,811,287  | 127,784   |
| Q32LL5   | INT12_BOVIN  | INTS12                           | Integrator complex subunit 12                                             | 1.000 | 5.0                | MAAAVNLELDPFLKALGFLHSK         | 3     | 0.999     | 26,452,583 | 2,235,420 |
| Q32LN5   | RN138_BOVIN  | RNF138                           | E3 ubiquitin-protein ligase RNF138                                        | 0.999 | 4.1                | FSGSCRCCK                      | 3     | 0.999     | 7,546,379  | 1,617,171 |
| Q32LP0   | URP2_BOVIN   | FERMT3                           | Fermitin family homolog 3                                                 | 0.999 | 4.5                | SQDEAPGEPIQQLNLKGCVEVPDQVNSGQK | 3     | 0.999     | 1,927,450  | 268,118   |
| Q32P68   | CK088_BOVIN  | UPF0722 protein C11orf88 homolog | 0.999                                                                     | 10.7  | SSAPEKTYFQPFPLEESK | 3                              | 0.999 | 1,886,792 | 307,158    |           |
| Q32P78   | RPAB5_BOVIN  | POLR2L                           | DNA-directed RNA polymerases I, II, and III subunit RPABC                 | 0.999 | 23.9               | YCCRRMILLAHVDLIEK              | 3     | 0.999     | 2,867,071  | 300,429   |
| Q32PG0   | Q32PG0_BOVIN | WWP1                             | Uncharacterized protein                                                   | 1.000 | 2.7                | DPRNGKSSVTK                    | 3     | 0.999     | 13,429,008 | 765,027   |
|          |              |                                  |                                                                           |       |                    | FIGRFIAMLFHGK                  | 3     | 0.999     |            |           |
| Q32PH2.2 | TM143_BOVIN  | TMEM143                          | isoform 2 of Transmembrane protein 143                                    | 0.960 | 4.8                | ALAHQLALPPTVGMYPPLPK           | 3     | 0.840     | 1,606,869  | 259,158   |
| Q32PH2   | TM143_BOVIN  | TMEM143                          | Transmembrane protein 143                                                 | 0.960 | 4.8                | MSFVMEYGVGVITSEEAEARRGQLYDNK   | 3     | 0.999     | 1,606,869  | 259,158   |
| Q32PH7   | SUV92_BOVIN  | SUV39H2                          | Histone-lysine N-methyltransferase SUV39H2                                | 0.999 | 6.6                | NLPVWEKYRPTQLDLISHQDLSTIQK     | 3     | 0.999     | 3,325,508  | 220,944   |
| Q32PI3   | Q32PI3_BOVIN | RF5                              | Replication factor C (Activator 1) 5, 36.5kDa                             | 0.999 | 8.9                | ASGTSGCATPPGATARAPSSSSSRK      | 3     | 0.999     | 26,698,942 | 1,809,695 |
| Q32XW6   | Q32XW6_BOVIN | ACVR2B                           | Activin A receptor type IIB (Fragment)                                    | 0.999 | 5.6                | ELDALLEQONTIESKMVTLHR          | 3     | 0.999     | 1,121,259  | 146,593   |
| Q3MHG0   | COG4_BOVIN   | COG4                             | Conserved oligomeric Golgi complex subunit 1                              | 0.999 | 2.7                |                                | 3     | 0.999     | 2,688,208  | 264,323   |
| Q3MHH0   | DCA12_BOVIN  | DCAF12                           | DDB1- and CUL4-associated factor 12                                       | 0.999 | 2.7                |                                | 3     | 0.999     | 1,990,912  | 312,304   |

|          |              |          |                                                       |       |                                   |   |       |             |            |
|----------|--------------|----------|-------------------------------------------------------|-------|-----------------------------------|---|-------|-------------|------------|
|          |              |          |                                                       |       | SVCSRERGSIR                       | 3 | 0.999 |             |            |
|          |              |          |                                                       |       | 2.8                               |   |       | 545,906     | 52,731     |
| Q3MHL4   | SAHH_BOVIN   | AHCY     | Adenosylhomocysteinase                                | 0.999 | PQVDRYLLKNGR                      | 3 | 0.999 |             |            |
|          |              |          |                                                       |       | 3.9                               |   |       | 8,677,363   | 424,430    |
| Q3MHM1   | Q3MHM1_BOVIN | CASQ2    | Calsequestrin                                         | 0.999 | KYDLLCLLYHEPLSSDK                 | 3 | 0.999 |             |            |
|          |              |          |                                                       |       | 34.6                              |   |       | 15,866,695  | 921,249    |
| Q3MHN5   | VTDB_BOVIN   | GC       | Vitamin D-binding protein                             | 1.000 | FMYESYNYGQAPLTLLVGYTK             | 2 | 1.000 |             |            |
|          |              |          |                                                       |       | GKFPDATEIDLQELVAK                 | 2 | 1.000 |             |            |
|          |              |          |                                                       |       | GKFPDATEIDLQELVAK                 | 3 | 1.000 |             |            |
|          |              |          |                                                       |       | GQELCADYSENTFTEYK                 | 2 | 1.000 |             |            |
|          |              |          |                                                       |       | HQPQEFPTYVEPTNDEICEAFRK           | 3 | 1.000 |             |            |
|          |              |          |                                                       |       | ILESTLKLDECCCHESSTACLNAKGPOLTR    | 3 | 0.999 |             |            |
|          |              |          |                                                       |       | SYLSMVGSCTSPNPTVCFLK              | 2 | 1.000 |             |            |
|          |              |          |                                                       |       | VLDDYVIFELSR                      | 2 | 1.000 |             |            |
|          |              |          |                                                       |       | VPTAHLEDVPLAEDITILSK              | 2 | 1.000 |             |            |
|          |              |          |                                                       |       | VPTAHLEDVPLAEDITILSK              | 3 | 1.000 |             |            |
| Q3MHN8   | TRM5_BOVIN   | TRMT5    | lRNA (guanine-N(1)-methyltransferase                  | 0.999 | 4.6                               |   |       | 2,686,775   | 353,639    |
|          |              |          |                                                       |       | VESCRITESASLILLPWASLIQK           | 3 | 0.999 |             |            |
|          |              |          |                                                       |       | 5.6                               |   |       | 11,477,617  | 1,223,452  |
| Q3MHP9   | TACT_BOVIN   | CD96     | T-cell surface protein 96                             | 0.999 | TPSSTAHVVDVSTSTSNVLPVQTSNSVDVPTNR | 3 | 0.999 |             |            |
|          |              |          |                                                       |       | 7.3                               |   |       | 6,528,592   | 572,098    |
| Q3MHR2   | DCK_BOVIN    | DCK      | Deoxycytidine kinase                                  | 0.999 | ISIEGNIAGKSTFVNLK                 | 3 | 0.999 |             |            |
|          |              |          |                                                       |       | 6.0                               |   |       | 1,096,261   | 182,556    |
| Q3MHV5   | Q3MHV5_BOVIN | PRMT2    | PRMT2 protein                                         | 0.999 | NPVWRRHMSVTLWSVTSIAODPTLQK        | 3 | 0.999 |             |            |
| Q3MHY7   | RM10_BOVIN   | MRPL10   | 39S ribosomal protein L10, mitochondria               | 0.999 | 16.0                              |   |       | 3,395,210   | 319,536    |
|          |              |          |                                                       |       | LPSLAALQAGELVGGTLTLTAR            | 3 | 0.999 |             |            |
|          |              |          |                                                       |       | YQNLPLFVGHNLLLSEEPK               | 3 | 0.999 |             |            |
| Q3MHY7-2 | RM10_BOVIN   | MRPL10   | Isoform 2 of 39S ribosomal protein L10, mitochondria  | 0.999 | 10.3                              |   |       | 240,606     | 25,809     |
|          |              |          |                                                       |       | YQNLPLFVGHNLLLSEEPK               | 3 | 0.999 |             |            |
| Q3MHZ2   | SPSB3_BOVIN  | SPSB3    | SPRY domain-containing SOCS box protein               | 0.999 | 3.2                               |   |       | 2,221,609   | 203,327    |
|          |              |          |                                                       |       | AWHFVLSAARR                       | 3 | 0.999 |             |            |
| Q3SWY3   | IMDH2_BOVIN  | IMPDH2   | Inosine-5'-monophosphate dehydrogenase                | 0.999 | 4.5                               |   |       | 2,764,063   | 236,004    |
|          |              |          |                                                       |       | YIKEKPSIQVIGGNVVTAQAQK            | 3 | 0.999 |             |            |
| Q3SX30   | PSMF1_BOVIN  | PSMF1    | Proteasome inhibitor PI31 subunit                     | 0.999 | 9.3                               |   |       | 6,194,262   | 2,322,981  |
|          |              |          |                                                       |       | QPTWCDPLGPFVAGGEDLDPFGCRR         | 3 | 0.999 |             |            |
| Q3SX41   | LC7L3_BOVIN  | LUC7L3   | Luc7-like protein 3                                   | 0.999 | 5.1                               |   |       | 1,764,533   | 285,895    |
|          |              |          |                                                       |       | G HARLALSONQOQSSGAAGPTGK          | 3 | 0.999 |             |            |
| Q3SYT4   | Q3SYT4_BOVIN | TSEN15   | Uncharacterized protein                               | 0.999 | 17.9                              |   |       | 308,620     | 50,472     |
|          |              |          |                                                       |       | ASRKLQGDPLPSTFLAIVESDSTIVVYK      | 3 | 0.999 |             |            |
| Q3SYV6   | Q3SYV6_BOVIN | KPNA2    | Karyopherin alpha 2 (RAG cohort 1, importin alpha 1   | 0.999 | 3.2                               |   |       | 1,991,662   | 191,438    |
|          |              |          |                                                       |       | EKQPPDNIIRAGLIPIK                 | 3 | 0.999 |             |            |
| Q3SYV7   | ZN345_BOVIN  | ZNF345   | Zinc finger protein 345                               | 0.999 | 3.9                               |   |       | 1,329,717   | 165,258    |
|          |              |          |                                                       |       | PYECKEKGKAFSFGSGLIR               | 3 | 0.999 |             |            |
| Q3SYW7   | Q3SYW7_BOVIN | SPARCL1  | SPARC-like 1 (Hevin)                                  | 0.999 | 4.4                               |   |       | 5,349,413   | 469,591    |
|          |              |          |                                                       |       | EPSNKKQEDSTQSDAVLEESYQPTQESK      | 3 | 0.999 |             |            |
| Q3SYX4   | Q3SYX4_BOVIN | ZNF394   | Uncharacterized protein                               | 0.999 | 2.2                               |   |       | 2,195,177   | 889,645    |
|          |              |          |                                                       |       | THLGEKHYTCNNFR                    | 3 | 0.999 |             |            |
| Q3SYZ2   | MAPK3_BOVIN  | MAPKAPK3 | MAP kinase-activated protein kinase                   | 0.999 | 5.0                               |   |       | 2,719,042   | 415,896    |
|          |              |          |                                                       |       | ARQEVDDHIVQASGGPHIVR              | 3 | 0.999 |             |            |
| Q3SZ01   | SH3Y1_BOVIN  | SH3YL1   | SH3 domain-containing YSC84-like protein              | 0.999 | 5.9                               |   |       | 8,528,654   | 1,122,045  |
|          |              |          |                                                       |       | IIFAHVIAKAKGLAILSVIK              | 3 | 0.999 |             |            |
| Q3SZ15   | Q3SZ15_BOVIN | EEF1E1   | Eukaryotic translation elongation factor 1 epsilon    | 0.999 | 9.2                               |   |       | 29,101,058  | 6,872,710  |
|          |              |          |                                                       |       | SLGSKGNKYSAQGER                   | 3 | 0.999 |             |            |
| Q3SZ40   | DDX56_BOVIN  | DDX56    | Probable ATP-dependent RNA helicase DDX56             | 1.000 | 3.9                               |   |       | 1,990,112   | 203,412    |
|          |              |          |                                                       |       | ANNPGLVTFVLPTEQSLGK               | 3 | 0.999 |             |            |
| Q3SZ57   | FETA_BOVIN   | AFP      | Alpha-fetoprotein                                     | 1.000 | 59.7                              |   |       | 340,824,521 | 26,060,811 |
|          |              |          |                                                       |       | AAPASIPFPVLEPVTSCK                | 2 | 1.000 |             |            |
|          |              |          |                                                       |       | APOLTSPPELMALTR                   | 2 | 1.000 |             |            |
|          |              |          |                                                       |       | CCOSQEQEVCFTEEGPALISK             | 2 | 1.000 |             |            |
|          |              |          |                                                       |       | COSQENPSECODKGESELEK              | 3 | 0.997 |             |            |
|          |              |          |                                                       |       | DFNQLSSR                          | 2 | 0.978 |             |            |
|          |              |          |                                                       |       | DLCQVQGVPLQTMK                    | 2 | 1.000 |             |            |
|          |              |          |                                                       |       | DVLTIEKPTGSK                      | 2 | 1.000 |             |            |
|          |              |          |                                                       |       | ESLLNQHICAVMGK                    | 2 | 1.000 |             |            |
|          |              |          |                                                       |       | FLGDRDFNQLSSR                     | 2 | 0.998 |             |            |
|          |              |          |                                                       |       | FLGDRDFNQLSSR                     | 3 | 0.976 |             |            |
|          |              |          |                                                       |       | FTYEYSR                           | 2 | 0.993 |             |            |
|          |              |          |                                                       |       | GNVLECLQDGER                      | 2 | 1.000 |             |            |
|          |              |          |                                                       |       | GYELLEK                           | 1 | 0.971 |             |            |
|          |              |          |                                                       |       | GYELLEK                           | 2 | 0.999 |             |            |
|          |              |          |                                                       |       | HDCFLAHK                          | 2 | 0.999 |             |            |
|          |              |          |                                                       |       | KAPOLTSPPELMALTR                  | 2 | 1.000 |             |            |
|          |              |          |                                                       |       | KMANAGAICCHLSEDK                  | 2 | 0.999 |             |            |
|          |              |          |                                                       |       | LAVPHLR                           | 2 | 1.000 |             |            |
|          |              |          |                                                       |       | LGEYLLQNAFLVAYTK                  | 2 | 1.000 |             |            |
|          |              |          |                                                       |       | LGEYLLQNAFLVAYTK                  | 3 | 0.999 |             |            |
|          |              |          |                                                       |       | LPTTLELGHCIHAENDDKPEGLSPNVNR      | 3 | 1.000 |             |            |
|          |              |          |                                                       |       | QKPOITEEQLETVVADFSGLLEK           | 2 | 0.999 |             |            |
|          |              |          |                                                       |       | QKPOITEEQLETVVADFSGLLEK           | 3 | 1.000 |             |            |
|          |              |          |                                                       |       | QLACQEGVADLIIGHLCIR               | 2 | 0.997 |             |            |
|          |              |          |                                                       |       | QLACQEGVADLIIGHLCIR               | 3 | 0.999 |             |            |
|          |              |          |                                                       |       | QPAGCLENOVSALFEEICR               | 2 | 1.000 |             |            |
|          |              |          |                                                       |       | QPAGCLENOVSALFEEICR               | 3 | 1.000 |             |            |
|          |              |          |                                                       |       | QOFLNLVK                          | 2 | 0.994 |             |            |
|          |              |          |                                                       |       | RHPVLYAPTILSVANQYK                | 3 | 1.000 |             |            |
|          |              |          |                                                       |       | RSCGLFOK                          | 2 | 0.988 |             |            |
|          |              |          |                                                       |       | SCGLFOK                           | 1 | 0.945 |             |            |
|          |              |          |                                                       |       | SCGLFOK                           | 2 | 0.859 |             |            |
|          |              |          |                                                       |       | VMSYICSQDILSR                     | 2 | 1.000 |             |            |
|          |              |          |                                                       |       | YGLSDCCSR                         | 2 | 0.995 |             |            |
|          |              |          |                                                       |       | YIQESQALAK                        | 1 | 0.974 |             |            |
|          |              |          |                                                       |       | YIQESQALAK                        | 2 | 1.000 |             |            |
| Q3SZH2   | Q3SZH2_BOVIN | ZC3HC1   | Uncharacterized protein                               | 0.999 | 5.6                               |   |       | 1,134,943   | 183,854    |
|          |              |          |                                                       |       | PEDLTKMLCTEDKISLHLLLEDELDR        | 3 | 0.999 |             |            |
| Q3SZ11   | TINAG_BOVIN  | TINAG    | Tubulointerstitial nephritis antigen                  | 0.999 | 5.0                               |   |       | 244,766     | 38,135     |
|          |              |          |                                                       |       | IAIQSQGRYNTANLSPQNLISCCA          | 3 | 0.999 |             |            |
| Q3SZK6   | Q3SZK6_BOVIN | RIPK1    | Receptor (TNFRSF)-interacting serine-threonine kinase | 0.999 | 3.0                               |   |       | 5,235,793   | 350,215    |
|          |              |          |                                                       |       | IIMETIEGMRYLHGEGVHK               | 3 | 0.999 |             |            |
| Q5E9Z3   | Q5E9Z3_BOVIN | VIL1     | Uncharacterized protein                               | 0.999 | 2.3                               |   |       | 732,946     | 72,910     |
| Q3SZP7   | VIL1_BOVIN   | Villin-1 | Villin-1                                              | 0.999 | 2.3                               |   |       | 732,946     | 72,910     |
|          |              |          |                                                       |       | QGHEPPTFTGWFLAWDPFK               | 3 | 0.999 |             |            |
| Q3SZR3   | A1AG_BOVIN   | ORM1     | Alpha-1-acid glycoprotein                             | 1.000 | 47.5                              |   |       | 28,541,804  | 4,432,736  |
| Q5GN72   | Q5GN72_BOVIN | agp      | Alpha-1 acid glycoprotein (Precursor                  | 1.000 | 47.5                              |   |       | 28,541,804  | 4,432,736  |
|          |              |          |                                                       |       | CIGQESIIYTDK                      | 2 | 1.000 |             |            |
|          |              |          |                                                       |       | CIGQESIIYTDK                      | 2 | 1.000 |             |            |
|          |              |          |                                                       |       | CIGQESIIYTDK                      | 3 | 0.997 |             |            |
|          |              |          |                                                       |       | DACGPLEK                          | 1 | 0.952 |             |            |
|          |              |          |                                                       |       | EHFVDLLSK                         | 2 | 1.000 |             |            |
|          |              |          |                                                       |       | EYQTIEDK                          | 1 | 0.965 |             |            |
|          |              |          |                                                       |       | HAEDKLITR                         | 2 | 1.000 |             |            |
|          |              |          |                                                       |       | HAEDKLITR                         | 3 | 1.000 |             |            |
|          |              |          |                                                       |       | NVGVSFYADKPEVTQEQK                | 2 | 1.000 |             |            |
|          |              |          |                                                       |       | NVGVSFYADKPEVTQEQK                | 3 | 0.998 |             |            |
|          |              |          |                                                       |       | NVGVSFYADKPEVTQEQK                | 3 | 0.999 |             |            |
|          |              |          |                                                       |       | TFMLAASNNGTK                      | 2 | 1.000 |             |            |
|          |              |          |                                                       |       | VESDREHFVDLLSK                    | 2 | 0.998 |             |            |
|          |              |          |                                                       |       | VESDREHFVDLLSK                    | 3 | 1.000 |             |            |
|          |              |          |                                                       |       | WFYIGSAFR                         | 2 | 0.999 |             |            |
| Q3SZV7   | HEMO_BOVIN   | HPX      | Hemopexin                                             | 1.000 | 31.6                              |   |       | 26,009,744  | 1,841,791  |
|          |              |          |                                                       |       | APELGHGVEGGVNAKPDPEVTER           | 3 | 1.000 |             |            |
|          |              |          |                                                       |       | CSDGWGFDATLDEHGNMLFLK             | 3 | 1.000 |             |            |
|          |              |          |                                                       |       | DYFMSCPNR                         | 2 | 1.000 |             |            |
|          |              |          |                                                       |       | FPGIPPLDAAVECHR                   | 3 | 1.000 |             |            |
|          |              |          |                                                       |       | IEHLWPGPSTVDAFLWDK                | 3 | 1.000 |             |            |
|          |              |          |                                                       |       | LDLNLGAGATWTEPLWHTK               | 2 | 1.000 |             |            |

|        |              |          |                                                                     |       |                                 |   |       |            |           |
|--------|--------------|----------|---------------------------------------------------------------------|-------|---------------------------------|---|-------|------------|-----------|
|        |              |          |                                                                     |       | LDLNLGAQATWTELPWLHTK            | 3 | 1.000 |            |           |
|        |              |          |                                                                     |       | MNSLLGCAPHQHS                   | 3 | 0.955 |            |           |
|        |              |          |                                                                     |       | VDGALCTEK                       | 2 | 0.998 |            |           |
|        |              |          |                                                                     |       | WKDAPSPVDAAFR                   | 2 | 0.983 |            |           |
| Q3SZW6 | CL024_BOVIN  |          | Uncharacterized protein C12orf24 homolog                            | 0.999 | 9.2                             |   |       | 6,812,260  | 280,789   |
| Q3SZZ2 | XBP1_BOVIN   | XBP1     | X-box-binding protein 1                                             | 0.999 | 13.0                            |   |       | 768,062    | 177,223   |
| Q3T000 | YKT6_BOVIN   | YKT6     | Synaptobrevin homolog YKT6                                          | 0.999 | 5.1                             |   |       | 592,456    | 123,780   |
| Q3T057 | RL23_BOVIN   | RPL23    | 60S ribosomal protein L23                                           | 0.999 | 14.3                            |   |       | 1,163,241  | 164,423   |
| Q3T099 | SYWM_BOVIN   | WARS2    | Tryptophanyl-tRNA synthetase, mitochondri                           | 0.999 | 4.4                             |   |       | 1,320,086  | 175,205   |
| Q3T0B5 | Q3T0B5_BOVIN | IER2     | Immediate early response 2                                          | 0.999 | 12.6                            |   |       | 11,478,421 | 2,032,688 |
| Q3T0I6 | Q3T0I6_BOVIN | SNAPC2   | Small nuclear RNA activating complex, polypeptide 2, 45kD.          | 0.999 | 5.6                             |   |       | 4,190,467  | 525,068   |
| Q3T0J3 | RM16_BOVIN   | MRPL16   | 39S ribosomal protein L16, mitochondria                             | 0.999 | 8.8                             |   |       | 5,443,875  | 858,627   |
| Q3T0T7 | SAR1B_BOVIN  | SAR1B    | GTP-binding protein SAR1t                                           | 0.999 | 8.6                             |   |       | 328,878    | 53,310    |
| Q3T0U4 | Q3T0U4_BOVIN | ADIPOR1  | Adiponectin receptor 1                                              | 0.999 | 7.7                             |   |       | 47,742,913 | 4,360,631 |
| Q3T102 | EIF3E_BOVIN  | EIF3E    | Eukaryotic translation initiation factor 3 subunit                  | 0.999 | 5.4                             |   |       | 604,744    | 184,182   |
| Q3T145 | MDHC_BOVIN   | MDH1     | Malate dehydrogenase, cytoplasmic                                   | 0.999 | 7.8                             |   |       | 18,958,292 | 937,606   |
| Q3T165 | PHB_BOVIN    | PHB      | Prohibitin                                                          | 0.999 | 10.7                            |   |       | 2,676,796  | 234,940   |
| Q3ZBE0 | DOX1_BOVIN   | DOX1     | ATP-dependent RNA helicase DOX1                                     | 1.000 | 3.3                             |   |       | 2,115,004  | 591,469   |
| Q3ZBH0 | TCPB_BOVIN   | CCT2     | T-complex protein 1 subunit beta                                    | 0.999 | 5.2                             |   |       | 497,694    | 106,604   |
| Q3ZBH9 | MCM7_BOVIN   | MCM7     | DNA replication licensing factor MCM7                               | 0.999 | 2.9                             |   |       | 2,052,788  | 264,605   |
| Q3ZBS7 | Q3ZBS7_BOVIN | VTN      | Uncharacterized protein                                             | 1.000 | 19.8                            |   |       | 20,254,660 | 1,194,414 |
|        |              |          |                                                                     |       | DVWIEGPIIDAAFTR                 | 2 | 1.000 |            |           |
|        |              |          |                                                                     |       | FQDGVLEPDFPR                    | 2 | 1.000 |            |           |
|        |              |          |                                                                     |       | GNHYWEYVYFQQPSQEDCEGSSLPAAFK    | 3 | 1.000 |            |           |
|        |              |          |                                                                     |       | LDAAMAGHIYVSGSAPSPFR            | 3 | 0.998 |            |           |
|        |              |          |                                                                     |       | LLFWGGSYGGAGQPQLISR             | 3 | 1.000 |            |           |
| Q3ZBV9 | DHR11_BOVIN  | DHRS11   | Dehydrogenase/reductase SDR family member 11                        | 0.999 | 10.6                            |   |       | 4,839,754  | 515,933   |
| Q3ZBW4 | PCNA_BOVIN   | PCNA     | Proliferating cell nuclear antigen                                  | 0.999 | 5.8                             |   |       | 4,578,133  | 332,339   |
| Q3ZBX5 | Q3ZBX5_BOVIN | SCYE1    | Small inducible cytokine subfamily E, member 1 (Endothelial monocy  | 0.999 | 5.9                             |   |       | 2,607,904  | 260,110   |
| Q3ZBX6 | RM03_BOVIN   | MRPL3    | 39S ribosomal protein L3, mitochondria                              | 0.999 | 6.3                             |   |       | 9,283,917  | 1,068,088 |
| Q3ZBZ7 | Q3ZBZ7_BOVIN | CCDC109B | Coiled-coil domain containing 109B                                  | 0.999 | 6.3                             |   |       | 2,133,777  | 187,193   |
| Q3ZC31 | HEM0_BOVIN   | ALAS2    | 5-aminolevulinate synthase, erythroid-specific, mitochondria        | 1.000 | 6.6                             |   |       | 10,202,806 | 570,493   |
|        |              |          |                                                                     |       | ICDLLLLSKYGIYQAINPTVPR          | 3 | 0.999 |            |           |
|        |              |          |                                                                     |       | NSGAAKFVFR                      | 3 | 0.999 |            |           |
|        |              |          |                                                                     |       | YGIYQAINPTVPRGEILLR             | 3 | 0.857 |            |           |
| Q3ZC44 | Q3ZC44_BOVIN | HNRNPAB  | Heterogeneous nuclear ribonucleoprotein A1                          | 0.999 | 7.7                             |   |       | 21,353,358 | 1,428,667 |
| Q3ZCA2 | CPSF5_BOVIN  | NUDT21   | Cleavage and polyadenylation specificity factor subunit             | 0.999 | 11.9                            |   |       | 4,621,779  | 982,764   |
| Q3ZCH0 | GRP75_BOVIN  | HSPA9    | Stress-70 protein, mitochondria                                     | 0.999 | 2.4                             |   |       | 2,005,129  | 361,235   |
| Q3ZCK3 | BPNT1_BOVIN  | BPNT1    | 3'(2'),5'-bisphosphate nucleotidase                                 | 0.999 | 8.4                             |   |       | 2,187,012  | 219,641   |
| Q4PJW3 | CP51A_BOVIN  | CYP51A1  | Lanosterol 14-alpha demethylase                                     | 0.999 | 5.6                             |   |       | 609,456    | 145,499   |
| Q56JX9 | FABP1_BOVIN  | FABP2    | Fatty acid-binding protein, intestine                               | 0.999 | 23.5                            |   |       | 3,309,117  | 393,575   |
| Q58CP2 | SUMF2_BOVIN  | SUMF2    | Sulfatase-modifying factor 2                                        | 0.999 | 8.6                             |   |       | 2,365,325  | 248,259   |
| Q58CQ5 | ANKZ1_BOVIN  | ANKZF1   | Ankyrin repeat and zinc finger domain-containing protein            | 0.999 | 1.5                             |   |       | 2,269,892  | 416,766   |
| Q58CQ9 | VNN1_BOVIN   | VNN1     | Pantetheinase                                                       | 1.000 | 8.6                             |   |       | 11,366,291 | 736,801   |
|        |              |          |                                                                     |       | MTGSGIYAPDSPR                   | 2 | 0.999 |            |           |
|        |              |          |                                                                     |       | NLDLLEGAVTSASK                  | 2 | 1.000 |            |           |
|        |              |          |                                                                     |       | ITDLHTCGDSVETASTR               | 3 | 1.000 |            |           |
| Q58CS5 | Q58CS5_BOVIN | FGD3     | FGD1 family, member 3                                               | 0.999 | 3.0                             |   |       | 2,696,137  | 253,620   |
| Q58CZ7 | Q58CZ7_BOVIN | TSPAN2   | Tetraspan 2                                                         | 0.999 | 13.4                            |   |       | 1,350,056  | 297,060   |
| Q58D20 | NLE1_BOVIN   | NLE1     | Notchless protein homolog 1                                         | 0.999 | 3.9                             |   |       | 719,777    | 114,915   |
| Q58D62 | FETUB_BOVIN  | FETUB    | Fetuin-B                                                            | 1.000 | 23.8                            |   |       | 29,475,273 | 717,978   |
|        |              |          |                                                                     |       | DGYVLSLNR                       | 2 | 0.956 |            |           |
|        |              |          |                                                                     |       | FMETATESLAK                     | 1 | 0.985 |            |           |
|        |              |          |                                                                     |       | FMETATESLAK                     | 2 | 1.000 |            |           |
|        |              |          |                                                                     |       | GSVQYLPDWDK                     | 2 | 1.000 |            |           |
|        |              |          |                                                                     |       | IFHESVYGCK                      | 2 | 1.000 |            |           |
|        |              |          |                                                                     |       | IFHESVYGCK                      | 3 | 0.995 |            |           |
|        |              |          |                                                                     |       | SESSCALESPPGSPVPGICHGSLGEPQGNQK | 3 | 1.000 |            |           |
|        |              |          |                                                                     |       | TSSQWVFGPAYFVEYLK               | 2 | 1.000 |            |           |
|        |              |          |                                                                     |       | TSSQWVFGPAYFVEYLK               | 3 | 0.999 |            |           |
| Q58D92 | Q58D92_BOVIN | RAD9A    | RAD9 homolog                                                        | 0.999 | 6.7                             |   |       | 1,424,493  | 552,085   |
| Q5EAC3 | Q5EAC3_BOVIN | RAD9A    | RAD9 homolog                                                        | 0.999 | 3.6                             |   |       | 1,424,493  | 552,085   |
| Q58DE5 | Q58DE5_BOVIN | DDX19L   | DDX19-like protein                                                  | 1.000 | 5.1                             |   |       | 860,809    | 79,162    |
| Q58DG1 | MYG1_BOVIN   |          | UPF0160 protein MYG1, mitochondria                                  | 0.999 | 4.2                             |   |       | 5,679,400  | 442,623   |
| Q58DI5 | PPAC2_BOVIN  | PPAPDC2  | Presqualene diphosphate phosphatase                                 | 0.999 | 8.0                             |   |       | 1,289,633  | 214,853   |
| Q58DJ9 | Q58DJ9_BOVIN | CHEK2    | Protein kinase CHK2 isoform alpha                                   | 0.999 | 3.9                             |   |       | 1,265,209  | 254,760   |
| Q58DK1 | CPT1B_BOVIN  | CPT1B    | Carnitine O-palmitoyltransferase 1, muscle isoform                  | 0.999 | 2.2                             |   |       | 1,162,030  | 215,723   |
| Q58DL5 | BCAR3_BOVIN  | BCAR3    | Breast cancer anti-estrogen resistance protein 1                    | 0.999 | 2.3                             |   |       | 1,190,704  | 153,462   |
| Q58DL9 | Q58DL9_BOVIN | PLTP     | Phospholipid transfer protein                                       | 0.933 | 2.8                             |   |       | 2,066,942  | 253,997   |
| Q58DM7 | OXND1_BOVIN  | OXNAD1   | Oxidoreductase NAD-binding domain-containing protein                | 0.999 | 4.9                             |   |       | 2,427,296  | 295,822   |
| Q58DQ1 | Q58DQ1_BOVIN | CRYZL1   | Crystallin, zeta-like 1 isoform epsilon                             | 0.999 | 12.6                            |   |       | 2,567,350  | 214,715   |
| Q59A28 | QORL1_BOVIN  | CRYZL1   | Quinone oxidoreductase-like protein                                 | 0.999 | 7.2                             |   |       | 2,567,350  | 214,715   |
| Q58DR0 | APC16_BOVIN  | ANAPC16  | Anaphase-promoting complex subunit 11                               | 0.999 | 30.0                            |   |       | 3,691,850  | 411,062   |
| Q59A32 | PUR2_BOVIN   | GART     | Trifunctional purine biosynthetic protein adenosine-                | 0.999 | 2.4                             |   |       | 21,172,375 | 1,643,237 |
| Q5BIM1 | TR145_BOVIN  | TRIM45   | Tripartite motif-containing protein 45                              | 0.999 | 2.9                             |   |       | 2,532,063  | 272,924   |
| Q5BIP2 | PGFRL_BOVIN  | PDGFRL   | Platelet-derived growth factor receptor-like protein                | 0.999 | 4.3                             |   |       | 18,329,108 | 1,834,933 |
| Q5BIR8 | Q5BIR8_BOVIN | FEZ1     | Fasciculation and elongation protein zeta 1 (Zygin                  | 1.000 | 5.4                             |   |       | 1,521,817  | 144,002   |
| Q5BLW6 | Q5BLW6_BOVIN | KCNK3    | Potassium voltage-gated channel delayed rectifier subfamily S membe | 0.999 | 4.9                             |   |       | 2,146,615  | 498,010   |

|        |              |           |                                                                                |       |                                |   |       |             |           |
|--------|--------------|-----------|--------------------------------------------------------------------------------|-------|--------------------------------|---|-------|-------------|-----------|
|        |              |           |                                                                                |       | DIDVQCSDEPPKCKQELPYFNIR        | 3 | 0.999 |             |           |
| Q5E956 | TPIS_BOVIN   | TP11      | Triosephosphate isomerase                                                      | 0.999 | 6.4                            |   |       | 3,287,708   | 648,124   |
| Q5E9F7 | COF1_BOVIN   | CFL1      | Cofilin-1                                                                      | 0.999 | 12.7                           |   |       | 4,825,071   | 539,219   |
| Q5E9F9 | PR57_BOVIN   | PSMC2     | 26S protease regulatory subunit 2                                              | 0.999 | 3.0                            |   |       | 1,103,346   | 218,041   |
| Q5E9G4 | TRI10_BOVIN  | TRIM10    | Tripartite motif-containing protein 10                                         | 0.999 | 5.3                            |   |       | 1,349,596   | 325,982   |
| Q5E9G8 | Q5E9G8_BOVIN | LGP2      | Putative uncharacterized protein LGP2                                          | 0.999 | 3.5                            |   |       | 3,218,363   | 693,954   |
| Q5E9H1 | FIBIN_BOVIN  | FIBIN     | Fin bud initiation factor homolog                                              | 0.999 | 7.1                            |   |       | 6,546,627   | 3,512,486 |
| Q5E9J8 | RIC8A_BOVIN  | RIC8A     | Synembryon-A                                                                   | 0.925 | 2.8                            |   |       | 4,902,183   | 334,723   |
| Q5E9N0 | BYST_BOVIN   | BYSL      | Bystin                                                                         | 0.999 | 4.8                            |   |       | 5,490,913   | 454,449   |
| Q5E9N5 | CLPB_BOVIN   | CLPB      | Caseinolytic peptidase B protein homolog                                       | 0.999 | 3.0                            |   |       | 5,333,821   | 540,895   |
|        |              |           |                                                                                |       | IAENLGDVQISDKITISK             | 3 | 0.999 |             |           |
|        |              |           |                                                                                |       | NRIAENLGDVQISDKITISK           | 3 | 0.999 |             |           |
| Q5E9V5 | KLD8B_BOVIN  | KLHDC8B   | Keich domain-containing protein 8E                                             | 0.999 | 3.4                            |   |       | 1,739,003   | 208,287   |
| Q5EA13 | Q5EA13_BOVIN | PPARA     | Peroxisome proliferative activated receptor, alpha isoform                     | 0.999 | 1.7                            |   |       | 1,415,375   | 328,164   |
| Q5EA15 | BHE40_BOVIN  | BHLHE40   | Class E basic helix-loop-helix protein 4                                       | 0.999 | 5.1                            |   |       | 3,864,282   | 1,073,886 |
| Q5EA66 | ANGL7_BOVIN  | ANGPTL7   | Angiotensin-related protein 7                                                  | 1.000 | 7.0                            |   |       | 1,976,845   | 260,657   |
| Q5EA82 | Q5EA82_BOVIN | C6orf11   | Chromosome 6 open reading frame 11                                             | 0.999 | 2.3                            |   |       | 3,788,108   | 252,766   |
| Q5EA94 | Q5EA94_BOVIN | CXCR6     | G protein-coupled receptor TYMSTR                                              | 0.999 | 6.8                            |   |       | 5,321,350   | 493,547   |
| Q5EA98 | MFAP1_BOVIN  | MFAP1     | Microfibrillar-associated protein 1                                            | 0.999 | 7.3                            |   |       | 4,520,855   | 341,004   |
|        |              |           |                                                                                |       | AQERKNEELVMEVEDEGR             | 3 | 0.999 |             |           |
|        |              |           |                                                                                |       | RLQNRISEDVEER                  | 3 | 0.999 |             |           |
| Q5EAC2 | GSHB_BOVIN   | GSS       | Glutathione synthetase                                                         | 0.999 | 4.2                            |   |       | 780,215     | 139,245   |
|        |              |           |                                                                                |       | EGGGNNLYGEEMVQALERLK           | 3 | 0.999 |             |           |
| Q6B411 | LYSM_BOVIN   |           | Lysozyme C, milk isozyme                                                       | 0.999 | 6.8                            |   |       | 3,045,782   | 112,336   |
|        |              |           |                                                                                |       | RVVRDPQGIK                     | 3 | 0.999 |             |           |
| Q6WCD5 | Q6WCD5_BOVIN | TLR4      | Toll-like receptor                                                             | 1.000 | 2.4                            |   |       | 528,525     | 74,998    |
| Q9GL65 | TLR4_BOVIN   | TLR4      | Toll-like receptor 4                                                           | 1.000 | 2.4                            |   |       | 528,525     | 74,998    |
| Q6WZ19 | NGB_BOVIN    | NGB       | Neuroglobin                                                                    | 1.000 | 19.2                           |   |       | 4,424,139   | 1,274,198 |
| Q70D51 | SIAT9_BOVIN  | ST3GAL5   | Lactosylceramide alpha-2,3-sialyltransferase                                   | 0.999 | 7.4                            |   |       | 1,820,237   | 354,098   |
| Q70E76 | Q70E76_BOVIN | ST3GAL-IV | Alpha2,3-sialyltransferase                                                     | 0.999 | 5.7                            |   |       | 1,700,069   | 221,161   |
| Q76LV2 | HS90A_BOVIN  | HSP90AA1  | Heat shock protein HSP 90-alpha                                                | 0.999 | 2.6                            |   |       | 227,070,008 | 2,301,802 |
| Q7SIH1 | A2MG_BOVIN   | A2M       | Alpha-2-macroglobulin                                                          | 1.000 | 32.1                           |   |       | 135,997,851 | 5,507,505 |
|        |              |           |                                                                                |       | AILYLNTGYQR                    | 2 | 0.981 |             |           |
|        |              |           |                                                                                |       | ALLAYAFALAGNER                 | 2 | 0.981 |             |           |
|        |              |           |                                                                                |       | ASFSVLGDILGSAMR                | 2 | 1.000 |             |           |
|        |              |           |                                                                                |       | ASFSVLGDILGSAMR                | 3 | 1.000 |             |           |
|        |              |           |                                                                                |       | DFVHFDDTSEPPTEVTR              | 2 | 1.000 |             |           |
|        |              |           |                                                                                |       | DTGLGLSPTASLR                  | 2 | 1.000 |             |           |
|        |              |           |                                                                                |       | EVIFNSLLCP5VDFVFLGAEDGGQVLR    | 2 | 1.000 |             |           |
|        |              |           |                                                                                |       | GGVDDEVTL5AYITIALLEMPVTHPVVR   | 3 | 1.000 |             |           |
|        |              |           |                                                                                |       | GNSEGTWLTAFVLK                 | 2 | 1.000 |             |           |
|        |              |           |                                                                                |       | GPTOEFK                        | 2 | 0.992 |             |           |
|        |              |           |                                                                                |       | GSGGTAHPPTVEEFVLPK             | 2 | 1.000 |             |           |
|        |              |           |                                                                                |       | GSGGTAHPPTVEEFVLPK             | 3 | 1.000 |             |           |
|        |              |           |                                                                                |       | GYFIDEAHTEALTWLAQK             | 3 | 0.999 |             |           |
|        |              |           |                                                                                |       | IAQWQNLVLENGLQQLTFPLSSEPFQGSYK | 2 | 1.000 |             |           |
|        |              |           |                                                                                |       | ICPQPEEHR                      | 3 | 0.937 |             |           |
|        |              |           |                                                                                |       | IQEEGTEVELTGK                  | 2 | 1.000 |             |           |
|        |              |           |                                                                                |       | IQHHTLASPVR                    | 2 | 1.000 |             |           |
|        |              |           |                                                                                |       | IQHHTLASPVR                    | 3 | 1.000 |             |           |
|        |              |           |                                                                                |       | ILLDESFFPLNELVPLVYVEDPK        | 2 | 0.978 |             |           |
|        |              |           |                                                                                |       | LLIYAILPDGEVVGD5AR             | 2 | 1.000 |             |           |
|        |              |           |                                                                                |       | LLTEDIYQPR                     | 2 | 0.996 |             |           |
|        |              |           |                                                                                |       | LPPNVVEESAR                    | 2 | 1.000 |             |           |
|        |              |           |                                                                                |       | NEESLVFVQTDKPIYKPEQTVK         | 3 | 1.000 |             |           |
|        |              |           |                                                                                |       | NPSNCYGEESNAVCEK               | 2 | 1.000 |             |           |
|        |              |           |                                                                                |       | NRDFVHFDDTSEPPTEVTR            | 2 | 0.984 |             |           |
|        |              |           |                                                                                |       | NRDFVHFDDTSEPPTEVTR            | 3 | 1.000 |             |           |
|        |              |           |                                                                                |       | PQYMLVPSLLHTETPEK              | 3 | 0.996 |             |           |
|        |              |           |                                                                                |       | RQEFEMK                        | 2 | 0.947 |             |           |
|        |              |           |                                                                                |       | RTEVLTSLYFEAVK                 | 2 | 0.996 |             |           |
|        |              |           |                                                                                |       | SNSFVLEFPR                     | 2 | 1.000 |             |           |
|        |              |           |                                                                                |       | SPTSQOVMFLTIQVK                | 2 | 1.000 |             |           |
|        |              |           |                                                                                |       | TQTVQAHYVLK                    | 2 | 1.000 |             |           |
|        |              |           |                                                                                |       | VGLNFSFGQSFAPASQAHLR           | 2 | 1.000 |             |           |
|        |              |           |                                                                                |       | VGLNFSFGQSFAPASQAHLR           | 3 | 1.000 |             |           |
|        |              |           |                                                                                |       | VTASPOSALCR                    | 2 | 1.000 |             |           |
|        |              |           |                                                                                |       | VYDYETDEFVAEYSAPCSK            | 2 | 1.000 |             |           |
| Q7YRD0 | PNO1_BOVIN   | PNO1      | RNA-binding protein PNO1                                                       | 0.999 | 11.1                           |   |       | 2,054,543   | 371,190   |
| Q862A9 | GPBAR_BOVIN  | GPBAR1    | G-protein coupled bile acid receptor 1                                         | 0.999 | 9.7                            |   |       | 2,976,547   | 273,520   |
| Q863C3 | GRP_BOVIN    | GRP       | Gastrin-releasing peptide                                                      | 0.999 | 19.4                           |   |       | 1,040,061   | 125,746   |
| Q8HYJ9 | FMO3_BOVIN   | FMO3      | Dimethylaniline monooxygenase [N-oxide-forming]                                | 0.999 | 3.0                            |   |       | 3,554,883   | 514,548   |
| Q8HZJ4 | CABP4_BOVIN  | CABP4     | Calcium-binding protein 4                                                      | 0.999 | 9.3                            |   |       | 7,731,992   | 2,534,203 |
| Q8MJ24 | LOXL4_BOVIN  | LOXL4     | Lysyl oxidase homolog 4                                                        | 0.999 | 2.8                            |   |       | 2,285,571   | 197,960   |
| Q8MJN0 | FUND2_BOVIN  | FUNDC2    | FUN14 domain-containing protein 2                                              | 0.999 | 9.5                            |   |       | 3,533,746   | 222,484   |
| Q8MKF0 | L2GL1_BOVIN  | LLGL1     | Lethal(2) giant larvae protein homolog                                         | 0.999 | 2.1                            |   |       | 4,511,650   | 375,084   |
| Q8SQB8 | ITB6_BOVIN   | ITGB6     | Integrin beta-6                                                                | 0.999 | 3.6                            |   |       | 2,764,405   | 434,476   |
| Q8WMX8 | ASZ1_BOVIN   | ASZ1      | Ankyrin repeat, SAM and basic leucine zipper domain-containing protein         | 0.999 | 3.4                            |   |       | 4,484,376   | 317,040   |
| Q8WN55 | PTBP1_BOVIN  | PTBP1     | Polypyrimidine tract-binding protein 1                                         | 0.999 | 3.0                            |   |       | 12,007,325  | 8,750,372 |
| Q95106 | BDNF_BOVIN   | BDNF      | Brain-derived neurotrophic factor                                              | 0.999 | 11.6                           |   |       | 3,059,708   | 246,311   |
| Q95118 | IL2RG_BOVIN  | IL2RG     | Cytokine receptor common subunit gamma                                         | 0.999 | 6.9                            |   |       | 1,224,696   | 126,879   |
| Q95121 | PEDF_BOVIN   | SERPINF1  | Pigment epithelium-derived factor                                              | 1.000 | 22.6                           |   |       | 14,332,489  | 1,444,008 |
|        |              |           |                                                                                |       | KTSLDFVLDDEER                  | 2 | 1.000 |             |           |
|        |              |           |                                                                                |       | LAAAVSNFYDLYR                  | 2 | 1.000 |             |           |
|        |              |           |                                                                                |       | LQSLFDAPDFSK                   | 2 | 1.000 |             |           |
|        |              |           |                                                                                |       | SGESPTANVLLSPLSVATLSALSGLAEQR  | 2 | 1.000 |             |           |
|        |              |           |                                                                                |       | VDLQEIENNWVQAGMK               | 2 | 1.000 |             |           |
|        |              |           |                                                                                |       | YGLDSDLNCK                     | 2 | 1.000 |             |           |
| Q95123 | DHSD_BOVIN   | SDHD      | Succinate dehydrogenase [ubiquinone] cytochrome b small subunit, mitochondrial | 0.999 | 10.1                           |   |       | 3,067,933   | 370,628   |
| Q9BG10 | GABT_BOVIN   | ABAT      | 4-aminobutyrate aminotransferase, mitochondrial                                | 0.999 | 9.8                            |   |       | 4,813,414   | 471,815   |
|        |              |           |                                                                                |       | TPVVRPALVSAFLQDR               | 3 | 0.999 |             |           |
|        |              |           |                                                                                |       | GTFC5FDTPDSSIRNKLILAR          | 3 | 0.999 |             |           |
|        |              |           |                                                                                |       | KTVAGIIVEPIQSEGGDNHASDDFFRK    | 3 | 0.999 |             |           |

| Q9MZL5   | CACB2_BOVIN | CACNB2     | Voltage-dependent L-type calcium channel subunit beta-               | 0.999 | 4.0                              |   |       | 1,588,672  | 187,295   |
|----------|-------------|------------|----------------------------------------------------------------------|-------|----------------------------------|---|-------|------------|-----------|
|          |             |            |                                                                      |       | VSYGSADSYTSRPSDSDVSLIEDR         | 3 | 0.999 |            |           |
| Q9N2I2   | IPSP_BOVIN  | SERPINA5   | Plasma serine protease inhibito                                      | 1.000 | 18.3                             |   |       | 11,503,249 | 989,112   |
|          |             |            |                                                                      |       | AQILEGLGIGPGESEELHSASQR          | 3 | 0.959 |            |           |
|          |             |            |                                                                      |       | STHEQDFYVTPETVVR                 | 3 | 0.999 |            |           |
|          |             |            |                                                                      |       | VSEMVHKAVVEDESGTQAAAATGMVITFKSAR | 3 | 0.999 |            |           |
| Q9TT36   | THBG_BOVIN  | SERPINA7   | Thyroxine-binding globuli                                            | 1.000 | 16.3                             |   |       | 11,095,154 | 800,855   |
|          |             |            |                                                                      |       | EGQMEWVEGAMSSK                   | 2 | 1.000 |            |           |
|          |             |            |                                                                      |       | FLNOPETLLHPIQFDR                 | 3 | 0.999 |            |           |
|          |             |            |                                                                      |       | KGWVDFVFK                        | 2 | 0.872 |            |           |
|          |             |            |                                                                      |       | MGIDAFADNADFSLTK                 | 2 | 1.000 |            |           |
|          |             |            |                                                                      |       | VVDPTFA                          | 1 | 0.949 |            |           |
| Q9TTA5   | SMAL1_BOVIN | SMARCAL1   | SWI/SNF-related matrix-associated actin-dependent regulator of chror | 1.000 | 4.1                              |   |       | 5,659,871  | 469,119   |
|          |             |            |                                                                      |       | IPSIIEYILDILES GREK              | 3 | 0.999 |            |           |
|          |             |            |                                                                      |       | SMPGPEPPWMPPAKEMTTKDK            | 3 | 0.999 |            |           |
| Q9TTE1   | SPA31_BOVIN | SERPINA3-1 | Serpin A3-1                                                          | 1.000 | 33.6                             |   |       | 30,730,130 | 3,554,314 |
|          |             |            |                                                                      |       | FIEDAQVLYSSEAFPTNFR              | 2 | 0.972 |            |           |
|          |             |            |                                                                      |       | GSTLLEILEGLK                     | 2 | 0.988 |            |           |
|          |             |            |                                                                      |       | LLDKFIEDAQVLYSSEAFPTNFR          | 3 | 1.000 |            |           |
|          |             |            |                                                                      |       | NPNKNVILSPVLSIALAFLSLGAR         | 3 | 0.999 |            |           |
|          |             |            |                                                                      |       | RIHELKLPK                        | 2 | 0.982 |            |           |
|          |             |            |                                                                      |       | RIHELKLPK                        | 3 | 1.000 |            |           |
|          |             |            |                                                                      |       | RVDGHTLASSNTDFAFSLYK             | 3 | 0.992 |            |           |
|          |             |            |                                                                      |       | SNYELNDILSOLGIR                  | 2 | 1.000 |            |           |
|          |             |            |                                                                      |       | SNYELNDILSOLGIR                  | 3 | 1.000 |            |           |
|          |             |            |                                                                      |       | TELVLVNYIYFK                     | 2 | 1.000 |            |           |
|          |             |            |                                                                      |       | VNRPFLLIIVLK                     | 3 | 0.974 |            |           |
|          |             |            |                                                                      |       | VNRPFLLIIVLKDTQSIIFLGK           | 3 | 1.000 |            |           |
| Q9TTK8   | KCRU_BOVIN  | CKMT1      | Creatine kinase U-type, mitochondria                                 | 0.999 | 6.3                              |   |       | 2,367,620  | 336,211   |
|          |             |            |                                                                      |       | LLSARPGRLRLALAGAGSLAAGFLLR       | 3 | 0.999 |            |           |
| Q9TU23-2 | CE290_BOVIN | CEP290     | Isoform 2 of Centrosomal protein of 290 kDε                          | 0.999 | 1.5                              |   |       | 364,105    | 51,140    |
|          |             |            |                                                                      |       | STEGTLTDFNPNFENDPNNSK            | 3 | 0.999 |            |           |
| Q9XSC3   | WDR44_BOVIN | WDR44      | WD repeat-containing protein 4ε                                      | 0.999 | 2.4                              |   |       | 233,968    | 36,337    |
|          |             |            |                                                                      |       | EEVEVKESDVLSESASSHSLSTK          | 3 | 0.999 |            |           |

----- Summary -----

Total Peptides: 3,544  
Total Proteins: 3,183  
Total Groups (Q#): 2,507  
Total Groups (#): 2,510  
Total Genes: 2,548  
Total Proteins in the Database: 26,881  
Total Genes in the Database: 20,324  
Protein Quantification Rate (%): 11.8  
Gene Quantification Rate (%): 12.5
